# Supplementary material for: Etiology Model of Kawasaki Disease and Multisystem Inflammatory Syndromes
Source: Preprints.org preprint supplement (doi:10.20944/preprints202401.0857.v1), 2024-01-11
Supplement: Supplementary file 1 [file supplementary]

## Sheet: Henoch_schonlein
['Henoch-Schonlein purpura']
Vaccine code report
Vaccine name	Symptoms	Administered	Frequency
COVID19	268	1634153	16
MMR	69	89659	76
HPV4	57	47277	120
HEP	54	75476	71
DTAP	43	64108	67
IPV	41	44537	92
FLU3	41	97624	41
HEPA	40	44185	90
PNC13	39	41775	93
HPV9	38	21735	174
FLUX	34	34142	99
VARCEL	33	85224	38
HIBV	29	60151	48
PNC	27	28560	94
MENB	27	14094	191
PPV	23	71426	32
FLU4	22	46657	47
TDAP	20	45855	43
DTAPIPV	19	13464	141
MMRV	18	20744	86
UNK	18	33974	52
MNQ	17	29053	58
FLUN3	17	6461	263
HEPAB	15	6486	231
HPV2	15	4925	304
FLUN4	13	4516	287
DTAPIPVHIB	12	12427	96
FLU(H1N1)	11	9183	119
RAB	10	6081	164
RV5	10	25071	39
FLUN(H1N1)	9	2892	311
TD	7	19084	36
VARZOS	6	120824	4
HPVX	6	2862	209
COVID19-2	5	39293	12
DTPIPV	5	707	707
MEN	4	5350	74
RV1	4	10854	36
HBHEPB	3	5580	53
DTP	3	24434	12
TYP	3	10391	28
FLUA3	3	3400	88
YF	3	4551	65
JEVX	3	150	2000
FLUC4	2	7019	28
OPV	2	24899	8
FLUX(H1N1)	2	2686	74
RVX	2	2415	82
MENHIB	2	336	595
HBPV	1	260	384
RUB	1	967	103
PNC20	1	1956	51
DTAPH	1	863	115
DTIPV	1	467	214
CEE	1	53	1886
FLUC3	1	1259	79
BCG	1	837	119
CHOL	1	324	308
DT	1	2848	35
DTPPVHBHPB	1	884	113
Vaccine name report
Vaccine name	Symptoms	Administered	Frequency
COVID19 (COVID19 (PFIZER-BIONTECH))	201	965666	20
HPV (GARDASIL)	57	47277	120
COVID19 (COVID19 (MODERNA))	53	555712	9
MEASLES + MUMPS + RUBELLA (MMR II)	49	78310	62
PNEUMO (PREVNAR13)	39	41775	93
HPV (GARDASIL 9)	38	21735	174
INFLUENZA (SEASONAL) (FLUZONE)	32	36871	86
INFLUENZA (SEASONAL) (NO BRAND NAME)	31	32989	93
VARICELLA (VARIVAX)	30	81886	36
PNEUMO (PREVNAR)	27	28560	94
MENINGOCOCCAL B (BEXSERO)	26	10508	247
DTAP (INFANRIX)	25	23866	104
HEP A (HAVRIX)	23	24256	94
HEP B (ENGERIX-B)	22	35400	62
HEP B (RECOMBIVAX HB)	21	28079	74
POLIO VIRUS, INACT. (NO BRAND NAME)	17	8261	205
INFLUENZA (SEASONAL) (FLUMIST)	17	6445	263
VACCINE NOT SPECIFIED (NO BRAND NAME)	17	31019	54
MEASLES + MUMPS + RUBELLA + VARICELLA (PROQUAD)	16	20115	79
PNEUMO (PNEUMOVAX)	16	61621	25
INFLUENZA (SEASONAL) (FLUZONE QUADRIVALENT)	16	16347	97
POLIO VIRUS, INACT. (POLIOVAX)	15	10104	148
HIB (ACTHIB)	15	22919	65
HPV (CERVARIX)	15	4925	304
MEASLES + MUMPS + RUBELLA (NO BRAND NAME)	14	8105	172
MENINGOCOCCAL CONJUGATE (MENACTRA)	13	19010	68
HEP A + HEP B (TWINRIX)	13	6293	206
COVID19 (COVID19 (JANSSEN))	12	98568	12
TDAP (BOOSTRIX)	11	17987	61
HEP A (VAQTA)	11	16725	65
DTAP + IPV (KINRIX)	11	9558	115
HEP B (NO BRAND NAME)	10	8400	119
ROTAVIRUS (ROTATEQ)	10	25071	39
POLIO VIRUS, INACT. (IPOL)	9	26172	34
INFLUENZA (H1N1) (H1N1 (MONOVALENT) (MEDIMMUNE))	9	2892	311
DTAP (DAPTACEL)	8	16336	48
DTAP + IPV + HIB (PENTACEL)	7	9705	72
INFLUENZA (SEASONAL) (FLUARIX)	7	5940	117
TDAP (ADACEL)	7	24751	28
PNEUMO (NO BRAND NAME)	7	6819	102
INFLUENZA (SEASONAL) (FLUMIST QUADRIVALENT)	7	3764	185
HIB (HIBERIX)	7	2645	264
HEP A (NO BRAND NAME)	6	3204	187
INFLUENZA (H1N1) (H1N1 (MONOVALENT) (SANOFI))	6	5039	119
HPV (NO BRAND NAME)	6	2862	209
INFLUENZA (SEASONAL) (FLUENZ TETRA)	6	752	797
DTAP (TRIPEDIA)	5	14560	34
MEASLES + MUMPS + RUBELLA (PRIORIX)	5	1171	426
DTP + IPV (NO BRAND NAME)	5	707	707
DTAP (NO BRAND NAME)	4	5865	68
HIB (NO BRAND NAME)	4	4694	85
INFLUENZA (H1N1) (H1N1 (MONOVALENT) (NOVARTIS))	4	3449	115
ZOSTER LIVE (ZOSTAVAX)	4	42792	9
ROTAVIRUS (ROTARIX)	4	10854	36
MENINGOCOCCAL CONJUGATE (MENVEO)	4	8652	46
RABIES (NO BRAND NAME)	4	870	459
RABIES (RABIPUR)	4	710	563
DTP (NO BRAND NAME)	3	16294	18
TD ADSORBED (NO BRAND NAME)	3	14119	21
INFLUENZA (SEASONAL) (FLUARIX QUADRIVALENT)	3	11571	25
INFLUENZA (SEASONAL) (FLUAD)	3	3326	90
COVID19 (COVID19 (PFIZER-BIONTECH BIVALENT))	3	22813	13
JAPANESE ENCEPHALITIS (NO BRAND NAME)	3	150	2000
INFLUENZA (SEASONAL) (FOREIGN)	3	1153	260
DTAP + IPV + HIB (INFANRIX QUINTA)	3	1417	211
DTAP + IPV (INFANRIX TETRA)	3	914	328
DTAP + IPV (UNKNOWN)	3	1281	234
HIB + HEP B (COMVAX)	2	5564	35
MENINGOCOCCAL (MENOMUNE)	2	1492	134
VARICELLA (NO BRAND NAME)	2	2951	67
RABIES (RABAVERT)	2	1732	115
HIB (PEDVAXHIB)	2	13654	14
DTAP + IPV (QUADRACEL)	2	1711	116
INFLUENZA (SEASONAL) (FLULAVAL QUADRIVALENT)	2	5569	35
INFLUENZA (SEASONAL) (FLUCELVAX QUADRIVALENT)	2	7019	28
COVID19 (COVID19 (UNKNOWN))	2	13824	14
COVID19 (COVID19 (MODERNA BIVALENT))	2	16480	12
POLIO VIRUS, ORAL (NO BRAND NAME)	2	2480	80
TD ADSORBED (DITANRIX)	2	182	1098
INFLUENZA (H1N1) (H1N1 (MONOVALENT) (UNKNOWN))	2	2686	74
TDAP (NO BRAND NAME)	2	3117	64
MEASLES + MUMPS + RUBELLA + VARICELLA (NO BRAND NAME)	2	629	317
HEP A + HEP B (NO BRAND NAME)	2	193	1036
YELLOW FEVER (NO BRAND NAME)	2	592	337
ROTAVIRUS (NO BRAND NAME)	2	2415	82
MENINGOCOCCAL (NO BRAND NAME)	2	3784	52
DTAP + IPV + HIB (UNKNOWN)	2	858	233
MENINGOCOCCAL CONJUGATE + HIB (MENITORIX)	2	291	687
DTAP (ACEL-IMUNE)	1	3378	29
HIB POLYSACCHARIDE (HIBIMUNE)	1	237	421
HIB (HIBTITER)	1	14676	6
HIB + HEP B (NO BRAND NAME)	1	16	6250
RUBELLA (MERUVAX II)	1	845	118
INFLUENZA (SEASONAL) (FLUVIRIN)	1	18518	5
TYPHOID VI POLYSACCHARIDE (TYPHIM VI)	1	5098	19
INFLUENZA (SEASONAL) (FLUZONE HIGH-DOSE)	1	16561	6
TD ADSORBED (TDVAX)	1	1181	84
ZOSTER (SHINGRIX)	1	68714	1
MENINGOCOCCAL B (TRUMENBA)	1	3586	27
INFLUENZA (SEASONAL) (AFLURIA QUADRIVALENT)	1	5420	18
VACCINE NOT SPECIFIED (OTHER)	1	2768	36
PNEUMO (PREVNAR20)	1	1956	51
TYPHOID VI POLYSACCHARIDE (NO BRAND NAME)	1	1836	54
DTAP + HIB (NO BRAND NAME)	1	301	332
TETANUS DIPHTHERIA (NO BRAND NAME)	1	2380	42
YELLOW FEVER (YF-VAX)	1	3650	27
DT + IPV (NO BRAND NAME)	1	436	229
INFLUENZA (H1N1) (H1N1 (MONOVALENT) (CSL))	1	502	199
MEASLES + MUMPS + RUBELLA (MMR I)	1	493	202
FSME-IMMUN. (NO BRAND NAME)	1	53	1886
INFLUENZA (SEASONAL) (OPTAFLU)	1	94	1063
TYPHOID LIVE ORAL TY21A (VIVOTIF)	1	3150	31
BCG (NO BRAND NAME)	1	530	188
CHOLERA (NO BRAND NAME)	1	144	694
DT ADSORBED (NO BRAND NAME)	1	2481	40
HEP B (FOREIGN)	1	2289	43
VARICELLA (VARILRIX)	1	387	258
DTAP+IPV+HIB+HEPB (VAXELIS)	1	884	113
ZOSTER (NO BRAND NAME)	1	9318	10
Age report:
Age	HEP	MMR	DTAP	HBPV	IPV	PNC	VARCEL	HBHEPB	DTP	HEPA	HIBV	MEN	RUB	FLU3	MNQ	FLUN3	TDAP	HPV4	MMRV	FLUX	TD	FLU(H1N1)	FLUN(H1N1)	DTAPIPVHIB	VARZOS	PNC13	DTAPIPV	RAB	PPV	TYP	FLUN4	HPV9	FLU4	HPVX	RV1	FLUA3	MENB	UNK	FLUC4	COVID19	COVID19-2	PNC20	OPV	DTAPH	HEPAB	YF	DTIPV	HPV2	JEVX
-1	12	3	4	0	3	2	1	0	0	4	5	1	0	0	1	1	2	8	1	13	0	0	0	2	1	10	3	4	2	1	7	5	1	1	1	1	8	4	0	106	0	0	0	0	2	1	0	4	1
0	8	0	7	0	18	10	1	1	1	0	13	0	0	1	0	0	0	0	0	0	0	0	0	4	0	12	1	0	3	0	0	0	1	0	3	0	1	4	0	0	0	0	0	1	0	0	0	0	0
1	1	14	5	1	3	8	9	1	0	8	5	0	0	3	0	0	0	0	2	0	0	0	0	5	0	8	0	0	1	0	0	0	3	0	0	0	1	0	0	0	0	0	0	0	0	0	0	0	0
2	0	4	4	0	1	2	2	1	0	5	1	0	0	2	0	0	0	0	0	1	0	0	0	0	0	0	0	0	2	0	0	0	2	0	0	0	2	0	0	2	0	0	0	0	0	0	0	0	0
3	0	3	1	0	0	3	1	0	0	3	0	0	0	6	0	4	0	0	1	2	0	1	1	0	0	3	0	0	0	0	0	0	1	0	0	0	2	0	0	1	0	0	0	0	0	0	0	0	0
4	3	7	7	0	6	1	5	0	0	1	2	0	0	3	0	3	0	0	10	3	0	0	2	1	0	3	9	0	2	0	3	0	4	0	0	0	2	0	0	2	0	0	0	0	2	0	0	0	0
5	4	19	10	0	7	0	7	0	1	5	2	0	0	6	0	2	0	0	4	0	0	1	3	0	1	0	5	0	2	0	0	0	2	0	0	0	3	1	0	8	1	0	0	0	2	0	0	0	0
6	4	2	2	0	0	0	1	0	0	1	0	0	0	6	0	3	2	0	0	2	0	2	1	0	0	0	1	0	0	0	0	0	3	0	0	0	3	1	0	1	0	0	0	0	0	0	0	0	0
7	2	4	1	0	1	0	0	0	0	1	0	0	0	3	0	0	1	0	0	0	1	3	0	0	0	0	0	0	0	0	0	0	2	0	0	0	0	0	0	5	0	0	0	0	1	0	1	0	0
8	3	5	1	0	0	0	1	0	1	0	1	0	0	5	0	2	0	0	0	1	0	0	1	0	0	0	0	0	0	0	2	0	0	0	0	0	2	0	0	2	1	0	0	0	0	0	0	0	0
9	1	4	0	0	0	0	2	0	0	1	0	0	0	3	0	0	0	0	0	1	0	0	1	0	0	0	0	1	0	0	0	0	0	0	0	0	0	0	0	2	0	0	0	0	1	0	0	0	0
10	2	2	0	0	0	0	1	0	0	0	0	0	0	0	1	2	2	1	0	0	0	0	0	0	0	0	0	0	2	0	0	1	0	0	0	0	1	0	0	4	0	0	1	0	0	0	0	1	0
11	1	0	0	0	0	0	1	0	0	1	0	0	0	0	5	0	5	4	0	0	1	1	0	0	0	0	0	0	0	0	0	0	1	0	0	0	0	0	0	3	0	0	0	0	0	0	0	3	0
12	3	0	0	0	0	0	1	0	0	2	0	0	0	1	3	0	3	4	0	0	0	1	0	0	0	0	0	0	0	0	1	4	1	3	0	0	0	0	0	5	0	0	0	0	0	0	0	0	0
13	2	0	0	0	0	0	0	0	0	1	0	0	0	0	2	0	1	9	0	0	1	0	0	0	0	0	0	0	0	0	0	1	0	0	0	0	0	0	0	7	0	0	0	0	0	0	0	1	0
14	1	1	0	0	1	0	0	0	0	1	0	1	0	0	1	0	3	11	0	0	2	0	0	0	0	0	0	0	0	0	0	1	0	0	0	0	0	0	0	2	0	0	0	0	0	0	0	1	0
15	2	0	0	0	0	0	0	0	0	2	0	0	0	0	0	0	0	4	0	0	1	0	0	0	0	0	0	2	0	1	0	1	0	0	0	0	0	0	1	4	0	0	1	0	0	0	0	2	0
16	0	0	0	0	0	0	0	0	0	0	0	0	0	0	1	0	0	1	0	1	0	0	0	0	0	0	0	0	0	0	0	2	0	1	0	0	1	0	0	7	0	0	0	0	1	0	0	0	0
17	0	0	0	0	0	0	0	0	0	0	0	1	0	0	2	0	0	2	0	0	0	1	0	0	0	0	0	0	0	0	0	3	0	1	0	0	1	0	0	1	0	0	0	0	1	1	0	0	0
18	0	0	0	0	0	0	0	0	0	0	0	1	0	0	0	0	0	3	0	0	0	0	0	0	0	0	0	0	0	0	0	1	0	0	0	0	0	0	0	1	0	0	0	0	0	0	0	0	0
19	1	0	0	0	0	0	0	0	0	0	0	0	0	0	1	0	0	0	0	1	0	0	0	0	0	0	0	0	0	0	0	0	0	0	0	0	0	0	0	0	0	0	0	0	0	0	0	1	0
20	2	0	0	0	0	0	0	0	0	2	0	0	0	0	0	0	0	0	0	0	0	0	0	0	0	0	0	2	0	0	0	1	0	0	0	0	0	0	0	1	0	0	0	0	0	0	0	0	2
21	1	0	0	0	0	0	0	0	0	0	0	0	0	0	0	0	0	1	0	0	0	0	0	0	0	0	0	0	0	0	0	2	0	0	0	0	0	0	0	2	0	0	0	0	0	0	0	0	0
22	0	1	0	0	0	0	0	0	0	0	0	0	0	0	0	0	0	0	0	0	0	0	0	0	0	0	0	0	0	0	0	0	0	0	0	0	0	0	0	0	0	0	0	0	0	0	0	0	0
23	0	0	0	0	0	0	0	0	0	0	0	0	0	0	0	0	0	0	0	0	0	0	0	0	0	0	0	0	0	0	0	4	0	0	0	0	0	1	1	1	0	0	0	0	0	0	0	0	0
24	0	0	0	0	0	0	0	0	0	0	0	0	0	0	0	0	0	0	0	0	0	0	0	0	0	0	0	0	0	0	0	1	0	0	0	0	0	0	0	2	0	0	0	0	1	0	0	0	0
25	0	0	0	0	0	0	0	0	0	0	0	0	0	0	0	0	0	0	0	1	0	0	0	0	0	0	0	0	0	0	0	5	0	0	0	0	0	1	0	1	1	0	0	0	0	0	0	1	0
26	0	0	0	0	1	0	0	0	0	0	0	0	0	0	0	0	0	0	0	0	1	0	0	0	0	0	0	1	0	0	0	4	0	0	0	0	0	0	0	3	0	0	0	0	1	1	0	0	0
27	0	0	0	0	0	0	0	0	0	0	0	0	0	0	0	0	0	0	0	0	0	0	0	0	0	0	0	0	0	0	0	0	0	0	0	0	0	1	0	1	1	0	0	0	0	0	0	0	0
28	0	0	0	0	0	0	0	0	0	1	0	0	0	0	0	0	0	1	0	0	0	0	0	0	0	0	0	0	0	0	0	0	0	0	0	0	0	1	0	1	0	0	0	0	0	0	0	0	0
29	0	0	0	0	0	0	0	0	0	1	0	0	0	0	0	0	0	2	0	0	0	0	0	0	0	0	0	0	0	0	0	0	0	0	0	0	0	0	0	1	0	0	0	0	0	0	0	0	0
30	0	0	0	0	0	0	0	0	0	0	0	0	0	0	0	0	0	0	0	0	0	0	0	0	0	0	0	0	0	0	0	0	0	0	0	0	0	0	0	1	0	0	0	0	0	0	0	1	0
31	0	0	0	0	0	0	0	0	0	0	0	0	0	0	0	0	0	0	0	0	0	0	0	0	0	0	0	0	0	0	0	0	0	0	0	0	0	0	0	3	0	0	0	0	0	0	0	0	0
32	0	0	0	0	0	0	0	0	0	0	0	0	0	0	0	0	0	0	0	0	0	1	0	0	0	0	0	0	0	0	0	0	0	0	0	0	0	0	0	2	0	0	0	0	0	0	0	0	0
33	0	0	0	0	0	0	0	0	0	0	0	0	0	0	0	0	0	2	0	0	0	0	0	0	0	0	0	0	0	0	0	0	0	0	0	0	0	0	0	1	0	0	0	0	0	0	0	0	0
34	0	0	0	0	0	0	0	0	0	0	0	0	0	0	0	0	0	0	0	0	0	0	0	0	0	0	0	0	0	0	0	0	0	0	0	0	0	0	0	3	0	0	0	0	0	0	0	0	0
35	1	0	0	0	0	0	0	0	0	0	0	0	0	0	0	0	0	0	0	0	0	0	0	0	0	0	0	0	0	0	0	0	0	0	0	0	0	0	0	1	0	0	0	0	0	0	0	0	0
36	0	0	0	0	0	0	0	0	0	0	0	0	0	0	0	0	0	0	0	0	0	0	0	0	0	0	0	0	0	0	0	0	0	0	0	0	0	0	0	1	0	0	0	0	0	0	0	0	0
37	0	0	0	0	0	0	0	0	0	0	0	0	0	0	0	0	0	0	0	0	0	0	0	0	0	0	0	0	0	0	0	0	0	0	0	0	0	0	0	2	0	0	0	0	0	0	0	0	0
38	0	0	0	0	0	0	0	0	0	0	0	0	0	0	0	0	0	2	0	0	0	0	0	0	0	1	0	0	0	0	0	0	0	0	0	0	0	1	0	6	0	0	0	0	0	0	0	0	0
39	0	0	0	0	0	0	0	0	0	0	0	0	1	0	0	0	0	0	0	1	0	0	0	0	0	0	0	0	0	0	0	0	0	0	0	0	0	0	0	2	0	0	0	0	0	0	0	0	0
40	0	0	0	0	0	0	0	0	0	0	0	0	0	0	0	0	0	1	0	0	0	0	0	0	0	0	0	0	0	0	0	0	0	0	0	0	0	0	0	3	0	0	0	0	0	0	0	0	0
41	0	0	0	0	0	0	0	0	0	0	0	0	0	0	0	0	0	1	0	0	0	0	0	0	0	0	0	0	0	0	0	0	0	0	0	0	0	0	0	2	0	0	0	0	0	0	0	0	0
42	0	0	0	0	0	0	0	0	0	0	0	0	0	0	0	0	0	0	0	0	0	0	0	0	0	0	0	0	0	0	0	0	0	0	0	0	0	0	0	2	0	0	0	0	1	0	0	0	0
43	0	0	0	0	0	0	0	0	0	0	0	0	0	0	0	0	0	0	0	0	0	0	0	0	0	0	0	0	0	0	0	0	0	0	0	0	0	0	0	0	0	0	0	0	0	0	0	0	0
44	0	0	0	0	0	0	0	0	0	0	0	0	0	0	0	0	0	0	0	0	0	0	0	0	0	0	0	0	0	0	0	0	0	0	0	0	0	0	0	1	0	0	0	0	0	0	0	0	0
45	0	0	0	0	0	0	0	0	0	0	0	0	0	0	0	0	0	0	0	0	0	0	0	0	0	0	0	0	0	0	0	0	0	0	0	0	0	0	0	2	0	0	0	0	0	0	0	0	0
46	0	0	0	0	0	0	0	0	0	0	0	0	0	0	0	0	0	0	0	0	0	0	0	0	0	0	0	0	0	0	0	0	0	0	0	0	0	0	0	1	0	0	0	0	0	0	0	0	0
47	0	0	0	0	0	0	0	0	0	0	0	0	0	0	0	0	0	0	0	0	0	0	0	0	0	0	0	0	0	0	0	0	0	0	0	0	0	0	0	5	0	0	0	0	0	0	0	0	0
48	0	0	0	0	0	0	0	0	0	0	0	0	0	0	0	0	0	0	0	0	0	0	0	0	0	0	0	0	0	0	0	0	0	0	0	0	0	0	0	0	0	0	0	0	0	0	0	0	0
49	0	0	0	0	0	0	0	0	0	0	0	0	0	0	0	0	0	0	0	4	0	0	0	0	0	0	0	0	0	0	0	0	0	0	0	0	0	1	0	0	0	0	0	0	0	0	0	0	0
50	0	0	0	0	0	0	0	0	0	0	0	0	0	0	0	0	0	0	0	0	0	0	0	0	0	0	0	0	0	0	0	0	0	0	0	0	0	0	0	0	0	0	0	0	0	0	0	0	0
51	0	0	0	0	0	0	0	0	0	0	0	0	0	0	0	0	0	0	0	0	0	0	0	0	0	0	0	0	0	1	0	0	0	0	0	0	0	0	0	0	0	0	0	0	0	0	0	0	0
52	0	0	0	0	0	0	0	0	0	0	0	0	0	0	0	0	0	0	0	0	0	0	0	0	0	0	0	0	0	0	0	0	0	0	0	0	0	0	0	2	0	0	0	0	0	0	0	0	0
53	0	0	0	0	0	0	0	0	0	0	0	0	0	0	0	0	0	0	0	0	0	0	0	0	0	0	0	0	0	0	0	0	0	0	0	0	0	0	0	0	0	0	0	0	0	0	0	0	0
54	0	0	0	0	0	0	0	0	0	0	0	0	0	0	0	0	0	0	0	0	0	0	0	0	1	0	0	0	0	0	0	0	0	0	0	0	0	0	0	0	0	0	0	0	0	0	0	0	0
55	0	0	0	0	0	0	0	0	0	0	0	0	0	0	0	0	0	0	0	0	0	0	0	0	0	0	0	0	0	0	0	0	0	0	0	0	0	0	0	0	0	0	0	0	0	0	0	0	0
56	0	0	0	0	0	0	0	0	0	0	0	0	0	0	0	0	0	0	0	0	0	0	0	0	0	0	0	0	0	0	0	0	0	0	0	0	0	0	0	4	0	0	0	0	0	0	0	0	0
57	0	0	0	0	0	0	0	0	0	0	0	0	0	0	0	0	0	0	0	0	0	0	0	0	0	0	0	0	0	0	0	0	0	0	0	0	0	0	0	1	0	0	0	0	0	0	0	0	0
58	0	0	0	0	0	0	0	0	0	0	0	0	0	0	0	0	0	0	0	0	0	0	0	0	1	0	0	0	0	0	0	0	0	0	0	0	0	0	0	3	0	0	0	0	0	0	0	0	0
59	0	0	0	0	0	0	0	0	0	0	0	0	0	0	0	0	0	0	0	0	0	0	0	0	0	0	0	0	0	0	0	0	0	0	0	0	0	0	0	2	0	0	0	0	0	0	0	0	0
60	0	0	0	0	0	0	0	0	0	0	0	0	0	0	0	0	1	0	0	0	0	0	0	0	1	0	0	0	1	0	0	0	0	0	0	0	0	0	0	0	0	0	0	0	0	0	0	0	0
61	0	0	0	0	0	0	0	0	0	0	0	0	0	0	0	0	0	0	0	0	0	0	0	0	0	0	0	0	0	0	0	0	0	0	0	0	0	0	0	1	0	0	0	0	0	0	0	0	0
62	0	0	0	0	0	0	0	0	0	0	0	0	0	0	0	0	0	0	0	0	0	0	0	0	0	0	0	0	1	0	0	0	0	0	0	0	0	0	0	1	0	0	0	0	0	0	0	0	0
63	0	0	1	0	0	0	0	0	0	0	0	0	0	0	0	0	0	0	0	0	0	0	0	0	0	0	0	0	1	0	0	0	0	0	0	0	0	0	0	2	0	0	0	0	0	0	0	0	0
64	0	0	0	0	0	0	0	0	0	0	0	0	0	0	0	0	0	0	0	0	0	0	0	0	0	0	0	0	0	0	0	0	0	0	0	0	0	0	0	2	0	0	0	0	0	0	0	0	0
65	0	0	0	0	0	0	0	0	0	0	0	0	0	0	0	0	0	0	0	1	0	0	0	0	0	1	0	0	3	0	0	0	0	0	0	0	0	0	0	2	0	0	0	0	0	0	0	0	0
66	0	0	0	0	0	0	0	0	0	0	0	0	0	0	0	0	0	0	0	0	0	0	0	0	0	0	0	0	0	0	0	0	0	0	0	0	0	0	0	1	0	1	0	0	0	0	0	0	0
67	0	0	0	0	0	0	0	0	0	0	0	0	0	0	0	0	0	0	0	2	0	0	0	0	0	0	0	0	1	0	0	0	0	0	0	0	0	0	0	3	0	0	0	0	0	0	0	0	0
68	0	0	0	0	0	0	0	0	0	0	0	0	0	0	0	0	0	0	0	0	0	0	0	0	0	1	0	0	0	0	0	0	0	0	0	0	0	0	0	0	0	0	0	0	0	0	0	0	0
69	0	0	0	0	0	0	0	0	0	0	0	0	0	0	0	0	0	0	0	0	0	0	0	0	0	0	0	0	0	0	0	0	0	0	0	0	0	1	0	2	0	0	0	0	0	0	0	0	0
70	0	0	0	0	0	0	0	0	0	0	0	0	0	0	0	0	0	0	0	0	0	0	0	0	0	0	0	0	1	0	0	0	0	0	0	0	0	0	0	1	0	0	0	0	0	0	0	0	0
71	0	0	0	0	0	0	0	0	0	0	0	0	0	0	0	0	0	0	0	0	0	0	0	0	0	0	0	0	0	0	0	0	0	0	0	0	0	0	0	3	0	0	0	0	0	0	0	0	0
72	0	0	0	0	0	0	0	0	0	0	0	0	0	1	0	0	0	0	0	0	0	0	0	0	0	0	0	0	0	0	0	0	1	0	0	0	0	0	0	4	0	0	0	0	0	0	0	0	0
73	0	0	0	0	0	0	0	0	0	0	0	0	0	0	0	0	0	0	0	0	0	0	0	0	0	0	0	0	0	0	0	0	0	0	0	0	0	0	0	2	0	0	0	0	0	0	0	0	0
74	0	0	0	0	0	0	0	0	0	0	0	0	0	0	0	0	0	0	0	0	0	0	0	0	0	0	0	0	0	0	0	0	0	0	0	0	0	0	0	1	0	0	0	0	0	0	0	0	0
75	0	0	0	0	0	1	0	0	0	0	0	0	0	1	0	0	0	0	0	0	0	0	0	0	1	0	0	0	0	0	0	0	0	0	0	0	0	0	0	2	1	0	0	0	0	0	0	0	0
76	0	0	0	0	0	0	0	0	0	0	0	0	0	0	0	0	0	0	0	0	0	0	0	0	0	0	0	0	0	0	0	0	0	0	0	1	0	0	0	2	0	0	0	0	0	0	0	0	0
77	0	0	0	0	0	0	0	0	0	0	0	0	0	0	0	0	0	0	0	0	0	0	0	0	0	0	0	0	1	0	0	0	0	0	0	1	0	0	0	2	0	0	0	0	0	0	0	0	0
78	0	0	0	0	0	0	0	0	0	0	0	0	0	0	0	0	0	0	0	0	0	0	0	0	0	0	0	0	0	0	0	0	0	0	0	0	0	0	0	1	0	0	0	0	0	0	0	0	0
79	0	0	0	0	0	0	0	0	0	0	0	0	0	0	0	0	0	0	0	0	0	0	0	0	0	0	0	0	0	0	0	0	0	0	0	0	0	0	0	0	0	0	0	0	0	0	0	0	0
80	0	0	0	0	0	0	0	0	0	0	0	0	0	0	0	0	0	0	0	0	0	0	0	0	0	0	0	0	0	0	0	0	0	0	0	0	0	0	0	0	0	0	0	0	0	0	0	0	0
81	0	0	0	0	0	0	0	0	0	0	0	0	0	0	0	0	0	0	0	0	0	0	0	0	0	0	0	0	0	0	0	0	0	0	0	0	0	0	0	0	0	0	0	0	0	0	0	0	0
82	0	0	0	0	0	0	0	0	0	0	0	0	0	0	0	0	0	0	0	0	0	0	0	0	0	0	0	0	0	0	0	0	0	0	0	0	0	0	0	0	0	0	0	0	0	0	0	0	0
83	0	0	0	0	0	0	0	0	0	0	0	0	0	0	0	0	0	0	0	0	0	0	0	0	0	0	0	0	0	0	0	0	0	0	0	0	0	0	0	0	0	0	0	0	0	0	0	0	0
84	0	0	0	0	0	0	0	0	0	0	0	0	0	0	0	0	0	0	0	0	0	0	0	0	0	0	0	0	0	0	0	0	0	0	0	0	0	0	0	0	0	0	0	0	0	0	0	0	0
85	0	0	0	0	0	0	0	0	0	0	0	0	0	0	0	0	0	0	0	0	0	0	0	0	0	0	0	0	0	0	0	0	0	0	0	0	0	0	0	0	0	0	0	0	0	0	0	0	0
86	0	0	0	0	0	0	0	0	0	0	0	0	0	0	0	0	0	0	0	0	0	0	0	0	0	0	0	0	0	0	0	0	0	0	0	0	0	0	0	0	0	0	0	0	0	0	0	0	0
87	0	0	0	0	0	0	0	0	0	0	0	0	0	0	0	0	0	0	0	0	0	0	0	0	0	0	0	0	0	0	0	0	0	0	0	0	0	0	0	0	0	0	0	0	0	0	0	0	0
88	0	0	0	0	0	0	0	0	0	0	0	0	0	0	0	0	0	0	0	0	0	0	0	0	0	0	0	0	0	0	0	0	0	0	0	0	0	0	0	1	0	0	0	0	0	0	0	0	0
89	0	0	0	0	0	0	0	0	0	0	0	0	0	0	0	0	0	0	0	0	0	0	0	0	0	0	0	0	0	0	0	0	0	0	0	0	0	0	0	0	0	0	0	0	0	0	0	0	0
90	0	0	0	0	0	0	0	0	0	0	0	0	0	0	0	0	0	0	0	0	0	0	0	0	0	0	0	0	0	0	0	0	0	0	0	0	0	0	0	1	0	0	0	0	0	0	0	0	0
91	0	0	0	0	0	0	0	0	0	0	0	0	0	0	0	0	0	0	0	0	0	0	0	0	0	0	0	0	0	0	0	0	0	0	0	0	0	0	0	0	0	0	0	0	0	0	0	0	0
92	0	0	0	0	0	0	0	0	0	0	0	0	0	0	0	0	0	0	0	0	0	0	0	0	0	0	0	0	0	0	0	0	0	0	0	0	0	0	0	0	0	0	0	0	0	0	0	0	0
93	0	0	0	0	0	0	0	0	0	0	0	0	0	0	0	0	0	0	0	0	0	0	0	0	0	0	0	0	0	0	0	0	0	0	0	0	0	0	0	0	0	0	0	0	0	0	0	0	0
94	0	0	0	0	0	0	0	0	0	0	0	0	0	0	0	0	0	0	0	0	0	0	0	0	0	0	0	0	0	0	0	0	0	0	0	0	0	0	0	1	0	0	0	0	0	0	0	0	0
95	0	0	0	0	0	0	0	0	0	0	0	0	0	0	0	0	0	0	0	0	0	0	0	0	0	0	0	0	0	0	0	0	0	0	0	0	0	0	0	0	0	0	0	0	0	0	0	0	0
96	0	0	0	0	0	0	0	0	0	0	0	0	0	0	0	0	0	0	0	0	0	0	0	0	0	0	0	0	0	0	0	0	0	0	0	0	0	0	0	0	0	0	0	0	0	0	0	0	0
97	0	0	0	0	0	0	0	0	0	0	0	0	0	0	0	0	0	0	0	0	0	0	0	0	0	0	0	0	0	0	0	0	0	0	0	0	0	0	0	0	0	0	0	0	0	0	0	0	0
98	0	0	0	0	0	0	0	0	0	0	0	0	0	0	0	0	0	0	0	0	0	0	0	0	0	0	0	0	0	0	0	0	0	0	0	0	0	0	0	0	0	0	0	0	0	0	0	0	0
99	0	0	0	0	0	0	0	0	0	0	0	0	0	0	0	0	0	0	0	0	0	0	0	0	0	0	0	0	0	0	0	0	0	0	0	0	0	0	0	0	0	0	0	0	0	0	0	0	0
100	0	0	0	0	0	0	0	0	0	0	0	0	0	0	0	0	0	0	0	0	0	0	0	0	0	0	0	0	0	0	0	0	0	0	0	0	0	0	0	0	0	0	0	0	0	0	0	0	0
101	0	0	0	0	0	0	0	0	0	0	0	0	0	0	0	0	0	0	0	0	0	0	0	0	0	0	0	0	0	0	0	0	0	0	0	0	0	0	0	0	0	0	0	0	0	0	0	0	0
102	0	0	0	0	0	0	0	0	0	0	0	0	0	0	0	0	0	0	0	0	0	0	0	0	0	0	0	0	0	0	0	0	0	0	0	0	0	0	0	0	0	0	0	0	0	0	0	0	0
103	0	0	0	0	0	0	0	0	0	0	0	0	0	0	0	0	0	0	0	0	0	0	0	0	0	0	0	0	0	0	0	0	0	0	0	0	0	0	0	0	0	0	0	0	0	0	0	0	0
104	0	0	0	0	0	0	0	0	0	0	0	0	0	0	0	0	0	0	0	0	0	0	0	0	0	0	0	0	0	0	0	0	0	0	0	0	0	0	0	0	0	0	0	0	0	0	0	0	0
105	0	0	0	0	0	0	0	0	0	0	0	0	0	0	0	0	0	0	0	0	0	0	0	0	0	0	0	0	0	0	0	0	0	0	0	0	0	0	0	0	0	0	0	0	0	0	0	0	0
106	0	0	0	0	0	0	0	0	0	0	0	0	0	0	0	0	0	0	0	0	0	0	0	0	0	0	0	0	0	0	0	0	0	0	0	0	0	0	0	0	0	0	0	0	0	0	0	0	0
107	0	0	0	0	0	0	0	0	0	0	0	0	0	0	0	0	0	0	0	0	0	0	0	0	0	0	0	0	0	0	0	0	0	0	0	0	0	0	0	0	0	0	0	0	0	0	0	0	0
108	0	0	0	0	0	0	0	0	0	0	0	0	0	0	0	0	0	0	0	0	0	0	0	0	0	0	0	0	0	0	0	0	0	0	0	0	0	0	0	0	0	0	0	0	0	0	0	0	0
109	0	0	0	0	0	0	0	0	0	0	0	0	0	0	0	0	0	0	0	0	0	0	0	0	0	0	0	0	0	0	0	0	0	0	0	0	0	0	0	0	0	0	0	0	0	0	0	0	0
110	0	0	0	0	0	0	0	0	0	0	0	0	0	0	0	0	0	0	0	0	0	0	0	0	0	0	0	0	0	0	0	0	0	0	0	0	0	0	0	0	0	0	0	0	0	0	0	0	0
111	0	0	0	0	0	0	0	0	0	0	0	0	0	0	0	0	0	0	0	0	0	0	0	0	0	0	0	0	0	0	0	0	0	0	0	0	0	0	0	0	0	0	0	0	0	0	0	0	0
112	0	0	0	0	0	0	0	0	0	0	0	0	0	0	0	0	0	0	0	0	0	0	0	0	0	0	0	0	0	0	0	0	0	0	0	0	0	0	0	0	0	0	0	0	0	0	0	0	0
113	0	0	0	0	0	0	0	0	0	0	0	0	0	0	0	0	0	0	0	0	0	0	0	0	0	0	0	0	0	0	0	0	0	0	0	0	0	0	0	0	0	0	0	0	0	0	0	0	0
114	0	0	0	0	0	0	0	0	0	0	0	0	0	0	0	0	0	0	0	0	0	0	0	0	0	0	0	0	0	0	0	0	0	0	0	0	0	0	0	0	0	0	0	0	0	0	0	0	0
115	0	0	0	0	0	0	0	0	0	0	0	0	0	0	0	0	0	0	0	0	0	0	0	0	0	0	0	0	0	0	0	0	0	0	0	0	0	0	0	0	0	0	0	0	0	0	0	0	0
116	0	0	0	0	0	0	0	0	0	0	0	0	0	0	0	0	0	0	0	0	0	0	0	0	0	0	0	0	0	0	0	0	0	0	0	0	0	0	0	0	0	0	0	0	0	0	0	0	0
117	0	0	0	0	0	0	0	0	0	0	0	0	0	0	0	0	0	0	0	0	0	0	0	0	0	0	0	0	0	0	0	0	0	0	0	0	0	0	0	0	0	0	0	0	0	0	0	0	0
118	0	0	0	0	0	0	0	0	0	0	0	0	0	0	0	0	0	0	0	0	0	0	0	0	0	0	0	0	0	0	0	0	0	0	0	0	0	0	0	0	0	0	0	0	0	0	0	0	0
119	0	0	0	0	0	0	0	0	0	0	0	0	0	0	0	0	0	0	0	0	0	0	0	0	0	0	0	0	0	0	0	0	0	0	0	0	0	0	0	0	0	0	0	0	0	0	0	0	0
120	0	0	0	0	0	0	0	0	0	0	0	0	0	0	0	0	0	0	0	0	0	0	0	0	0	0	0	0	0	0	0	0	0	0	0	0	0	0	0	0	0	0	0	0	0	0	0	0	0
Age report: count|total|freq/100K
Age	HEP	MMR	DTAP	HBPV	IPV	PNC	VARCEL	HBHEPB	DTP	HEPA	HIBV	MEN	RUB	FLU3	MNQ	FLUN3	TDAP	HPV4	MMRV	FLUX	TD	FLU(H1N1)	FLUN(H1N1)	DTAPIPVHIB	VARZOS	PNC13	DTAPIPV	RAB	PPV	TYP	FLUN4	HPV9	FLU4	HPVX	RV1	FLUA3	MENB	UNK	FLUC4	COVID19	COVID19-2	PNC20	OPV	DTAPH	HEPAB	YF	DTIPV	HPV2	JEVX
-1	12|16277|73	3|11940|25	4|3362|118	0|0|0	3|2473|121	2|1693|118	1|16090|6	0|0|0	0|0|0	4|6815|58	5|6212|80	1|1142|87	0|0|0	0|0|0	1|2601|38	1|840|119	2|3451|57	8|12921|61	1|6945|14	13|11019|117	0|0|0	0|0|0	0|0|0	2|1397|143	1|39337|2	10|7003|142	3|1535|195	4|1341|298	2|13840|14	1|2167|46	7|1089|642	5|7666|65	1|3610|27	1|1410|70	1|2769|36	1|260|384	8|4032|198	4|8220|48	0|0|0	106|477193|22	0|0|0	0|0|0	0|0|0	0|0|0	2|1364|146	1|559|178	0|0|0	4|1391|287	1|43|2325
0	8|14617|54	0|0|0	7|14495|48	0|0|0	18|13315|135	10|15682|63	1|777|128	1|3017|33	1|13133|7	0|0|0	13|31979|40	0|0|0	0|0|0	1|1860|53	0|0|0	0|0|0	0|0|0	0|0|0	0|0|0	0|0|0	0|0|0	0|0|0	0|0|0	4|8134|49	0|0|0	12|14578|82	1|1260|79	0|0|0	3|2058|145	0|0|0	0|0|0	0|0|0	1|1046|95	0|0|0	3|7721|38	0|0|0	1|1687|59	4|1356|294	0|0|0	0|0|0	0|0|0	0|0|0	0|0|0	1|268|373	0|0|0	0|0|0	0|0|0	0|0|0	0|0|0
1	1|2884|34	14|30890|45	5|13938|35	1|95|1052	3|4398|68	8|8068|99	9|25025|35	1|1887|52	0|0|0	8|9714|82	5|17022|29	0|0|0	0|0|0	3|3164|94	0|0|0	0|0|0	0|0|0	0|0|0	2|3852|51	0|0|0	0|0|0	0|0|0	0|0|0	5|1922|260	0|0|0	8|6421|124	0|0|0	0|0|0	1|871|114	0|0|0	0|0|0	0|0|0	3|1353|221	0|0|0	0|0|0	0|0|0	1|621|161	0|0|0	0|0|0	0|0|0	0|0|0	0|0|0	0|0|0	0|0|0	0|0|0	0|0|0	0|0|0	0|0|0	0|0|0
2	0|0|0	4|2208|181	4|2557|156	0|0|0	1|809|123	2|1023|195	2|2606|76	1|170|588	0|0|0	5|2306|216	1|1858|53	0|0|0	0|0|0	2|1016|196	0|0|0	0|0|0	0|0|0	0|0|0	0|0|0	1|265|377	0|0|0	0|0|0	0|0|0	0|0|0	0|0|0	0|0|0	0|0|0	0|0|0	2|831|240	0|0|0	0|0|0	0|0|0	2|619|323	0|0|0	0|0|0	0|0|0	2|252|793	0|0|0	0|0|0	2|826|242	0|0|0	0|0|0	0|0|0	0|0|0	0|0|0	0|0|0	0|0|0	0|0|0	0|0|0
3	0|0|0	3|1428|210	1|1559|64	0|0|0	0|0|0	3|612|490	1|2125|47	0|0|0	0|0|0	3|1073|279	0|0|0	0|0|0	0|0|0	6|1028|583	0|0|0	4|401|997	0|0|0	0|0|0	1|223|448	2|271|738	0|0|0	1|307|325	1|140|714	0|0|0	0|0|0	3|707|424	0|0|0	0|0|0	0|0|0	0|0|0	0|0|0	0|0|0	1|622|160	0|0|0	0|0|0	0|0|0	2|87|2298	0|0|0	0|0|0	1|865|115	0|0|0	0|0|0	0|0|0	0|0|0	0|0|0	0|0|0	0|0|0	0|0|0	0|0|0
4	3|812|369	7|14037|49	7|13054|53	0|0|0	6|10572|56	1|617|162	5|7828|63	0|0|0	0|0|0	1|2372|42	2|841|237	0|0|0	0|0|0	3|1321|227	0|0|0	3|468|641	0|0|0	0|0|0	10|5321|187	3|267|1123	0|0|0	0|0|0	2|151|1324	1|312|320	0|0|0	3|817|367	9|6200|145	0|0|0	2|266|751	0|0|0	3|292|1027	0|0|0	4|962|415	0|0|0	0|0|0	0|0|0	2|77|2597	0|0|0	0|0|0	2|1071|186	0|0|0	0|0|0	0|0|0	0|0|0	2|12|16666	0|0|0	0|0|0	0|0|0	0|0|0
5	4|948|421	19|9507|199	10|9546|104	0|0|0	7|6940|100	0|0|0	7|4693|149	0|0|0	1|1724|58	5|1815|275	2|270|740	0|0|0	0|0|0	6|753|796	0|0|0	2|363|550	0|0|0	0|0|0	4|2021|197	0|0|0	0|0|0	1|177|564	3|169|1775	0|0|0	1|92|1086	0|0|0	5|2437|205	0|0|0	2|220|909	0|0|0	0|0|0	0|0|0	2|663|301	0|0|0	0|0|0	0|0|0	3|66|4545	1|224|446	0|0|0	8|2751|290	1|334|299	0|0|0	0|0|0	0|0|0	2|24|8333	0|0|0	0|0|0	0|0|0	0|0|0
6	4|505|792	2|1424|140	2|1379|145	0|0|0	0|0|0	0|0|0	1|1770|56	0|0|0	0|0|0	1|566|176	0|0|0	0|0|0	0|0|0	6|546|1098	0|0|0	3|301|996	2|213|938	0|0|0	0|0|0	2|151|1324	0|0|0	2|155|1290	1|169|591	0|0|0	0|0|0	0|0|0	1|332|301	0|0|0	0|0|0	0|0|0	0|0|0	0|0|0	3|542|553	0|0|0	0|0|0	0|0|0	3|61|4918	1|123|813	0|0|0	1|1921|52	0|0|0	0|0|0	0|0|0	0|0|0	0|0|0	0|0|0	0|0|0	0|0|0	0|0|0
7	2|385|519	4|524|763	1|338|295	0|0|0	1|303|330	0|0|0	0|0|0	0|0|0	0|0|0	1|413|242	0|0|0	0|0|0	0|0|0	3|496|604	0|0|0	0|0|0	1|181|552	0|0|0	0|0|0	0|0|0	1|100|1000	3|162|1851	0|0|0	0|0|0	0|0|0	0|0|0	0|0|0	0|0|0	0|0|0	0|0|0	0|0|0	0|0|0	2|516|387	0|0|0	0|0|0	0|0|0	0|0|0	0|0|0	0|0|0	5|2117|236	0|0|0	0|0|0	0|0|0	0|0|0	1|14|7142	0|0|0	1|1|100000	0|0|0	0|0|0
8	3|400|750	5|430|1162	1|171|584	0|0|0	0|0|0	0|0|0	1|1310|76	0|0|0	1|25|4000	0|0|0	1|35|2857	0|0|0	0|0|0	5|475|1052	0|0|0	2|238|840	0|0|0	0|0|0	0|0|0	1|101|990	0|0|0	0|0|0	1|115|869	0|0|0	0|0|0	0|0|0	0|0|0	0|0|0	0|0|0	0|0|0	2|137|1459	0|0|0	0|0|0	0|0|0	0|0|0	0|0|0	2|52|3846	0|0|0	0|0|0	2|2194|91	1|260|384	0|0|0	0|0|0	0|0|0	0|0|0	0|0|0	0|0|0	0|0|0	0|0|0
9	1|508|196	4|416|961	0|0|0	0|0|0	0|0|0	0|0|0	2|1342|149	0|0|0	0|0|0	1|540|185	0|0|0	0|0|0	0|0|0	3|512|585	0|0|0	0|0|0	0|0|0	0|0|0	0|0|0	1|114|877	0|0|0	0|0|0	1|152|657	0|0|0	0|0|0	0|0|0	0|0|0	1|42|2380	0|0|0	0|0|0	0|0|0	0|0|0	0|0|0	0|0|0	0|0|0	0|0|0	0|0|0	0|0|0	0|0|0	2|2417|82	0|0|0	0|0|0	0|0|0	0|0|0	1|13|7692	0|0|0	0|0|0	0|0|0	0|0|0
10	2|654|305	2|473|422	0|0|0	0|0|0	0|0|0	0|0|0	1|1454|68	0|0|0	0|0|0	0|0|0	0|0|0	0|0|0	0|0|0	0|0|0	1|292|342	2|190|1052	2|794|251	1|423|236	0|0|0	0|0|0	0|0|0	0|0|0	0|0|0	0|0|0	0|0|0	0|0|0	0|0|0	0|0|0	2|141|1418	0|0|0	0|0|0	1|238|420	0|0|0	0|0|0	0|0|0	0|0|0	1|58|1724	0|0|0	0|0|0	4|2687|148	0|0|0	0|0|0	1|44|2272	0|0|0	0|0|0	0|0|0	0|0|0	1|27|3703	0|0|0
11	1|1373|72	0|0|0	0|0|0	0|0|0	0|0|0	0|0|0	1|2224|44	0|0|0	0|0|0	1|1357|73	0|0|0	0|0|0	0|0|0	0|0|0	5|6957|71	0|0|0	5|6647|75	4|3056|130	0|0|0	0|0|0	1|472|211	1|179|558	0|0|0	0|0|0	0|0|0	0|0|0	0|0|0	0|0|0	0|0|0	0|0|0	0|0|0	0|0|0	1|738|135	0|0|0	0|0|0	0|0|0	0|0|0	0|0|0	0|0|0	3|3950|75	0|0|0	0|0|0	0|0|0	0|0|0	0|0|0	0|0|0	0|0|0	3|160|1875	0|0|0
12	3|1447|207	0|0|0	0|0|0	0|0|0	0|0|0	0|0|0	1|1764|56	0|0|0	0|0|0	2|1185|168	0|0|0	0|0|0	0|0|0	1|483|207	3|3253|92	0|0|0	3|3124|96	4|3446|116	0|0|0	0|0|0	0|0|0	1|149|671	0|0|0	0|0|0	0|0|0	0|0|0	0|0|0	0|0|0	0|0|0	0|0|0	1|122|819	4|1853|215	1|515|194	3|249|1204	0|0|0	0|0|0	0|0|0	0|0|0	0|0|0	5|6136|81	0|0|0	0|0|0	0|0|0	0|0|0	0|0|0	0|0|0	0|0|0	0|0|0	0|0|0
13	2|897|222	0|0|0	0|0|0	0|0|0	0|0|0	0|0|0	0|0|0	0|0|0	0|0|0	1|923|108	0|0|0	0|0|0	0|0|0	0|0|0	2|1471|135	0|0|0	1|1269|78	9|3152|285	0|0|0	0|0|0	1|398|251	0|0|0	0|0|0	0|0|0	0|0|0	0|0|0	0|0|0	0|0|0	0|0|0	0|0|0	0|0|0	1|1222|81	0|0|0	0|0|0	0|0|0	0|0|0	0|0|0	0|0|0	0|0|0	7|4862|143	0|0|0	0|0|0	0|0|0	0|0|0	0|0|0	0|0|0	0|0|0	1|569|175	0|0|0
14	1|749|133	1|414|241	0|0|0	0|0|0	1|200|500	0|0|0	0|0|0	0|0|0	0|0|0	1|899|111	0|0|0	1|117|854	0|0|0	0|0|0	1|1316|75	0|0|0	3|975|307	11|3132|351	0|0|0	0|0|0	2|633|315	0|0|0	0|0|0	0|0|0	0|0|0	0|0|0	0|0|0	0|0|0	0|0|0	0|0|0	0|0|0	1|988|101	0|0|0	0|0|0	0|0|0	0|0|0	0|0|0	0|0|0	0|0|0	2|5306|37	0|0|0	0|0|0	0|0|0	0|0|0	0|0|0	0|0|0	0|0|0	1|556|179	0|0|0
15	2|776|257	0|0|0	0|0|0	0|0|0	0|0|0	0|0|0	0|0|0	0|0|0	0|0|0	2|845|236	0|0|0	0|0|0	0|0|0	0|0|0	0|0|0	0|0|0	0|0|0	4|3208|124	0|0|0	0|0|0	1|635|157	0|0|0	0|0|0	0|0|0	0|0|0	0|0|0	0|0|0	2|45|4444	0|0|0	1|62|1612	0|0|0	1|811|123	0|0|0	0|0|0	0|0|0	0|0|0	0|0|0	0|0|0	1|71|1408	4|6410|62	0|0|0	0|0|0	1|42|2380	0|0|0	0|0|0	0|0|0	0|0|0	2|496|403	0|0|0
16	0|0|0	0|0|0	0|0|0	0|0|0	0|0|0	0|0|0	0|0|0	0|0|0	0|0|0	0|0|0	0|0|0	0|0|0	0|0|0	0|0|0	1|3057|32	0|0|0	0|0|0	1|3062|32	0|0|0	1|81|1234	0|0|0	0|0|0	0|0|0	0|0|0	0|0|0	0|0|0	0|0|0	0|0|0	0|0|0	0|0|0	0|0|0	2|901|221	0|0|0	1|90|1111	0|0|0	0|0|0	1|1619|61	0|0|0	0|0|0	7|8329|84	0|0|0	0|0|0	0|0|0	0|0|0	1|42|2380	0|0|0	0|0|0	0|0|0	0|0|0
17	0|0|0	0|0|0	0|0|0	0|0|0	0|0|0	0|0|0	0|0|0	0|0|0	0|0|0	0|0|0	0|0|0	1|186|537	0|0|0	0|0|0	2|2562|78	0|0|0	0|0|0	2|2843|70	0|0|0	0|0|0	0|0|0	1|123|813	0|0|0	0|0|0	0|0|0	0|0|0	0|0|0	0|0|0	0|0|0	0|0|0	0|0|0	3|921|325	0|0|0	1|80|1250	0|0|0	0|0|0	1|1694|59	0|0|0	0|0|0	1|10274|9	0|0|0	0|0|0	0|0|0	0|0|0	1|52|1923	1|77|1298	0|0|0	0|0|0	0|0|0
18	0|0|0	0|0|0	0|0|0	0|0|0	0|0|0	0|0|0	0|0|0	0|0|0	0|0|0	0|0|0	0|0|0	1|410|243	0|0|0	0|0|0	0|0|0	0|0|0	0|0|0	3|2321|129	0|0|0	0|0|0	0|0|0	0|0|0	0|0|0	0|0|0	0|0|0	0|0|0	0|0|0	0|0|0	0|0|0	0|0|0	0|0|0	1|607|164	0|0|0	0|0|0	0|0|0	0|0|0	0|0|0	0|0|0	0|0|0	1|7237|13	0|0|0	0|0|0	0|0|0	0|0|0	0|0|0	0|0|0	0|0|0	0|0|0	0|0|0
19	1|767|130	0|0|0	0|0|0	0|0|0	0|0|0	0|0|0	0|0|0	0|0|0	0|0|0	0|0|0	0|0|0	0|0|0	0|0|0	0|0|0	1|556|179	0|0|0	0|0|0	0|0|0	0|0|0	1|101|990	0|0|0	0|0|0	0|0|0	0|0|0	0|0|0	0|0|0	0|0|0	0|0|0	0|0|0	0|0|0	0|0|0	0|0|0	0|0|0	0|0|0	0|0|0	0|0|0	0|0|0	0|0|0	0|0|0	0|0|0	0|0|0	0|0|0	0|0|0	0|0|0	0|0|0	0|0|0	0|0|0	1|61|1639	0|0|0
20	2|727|275	0|0|0	0|0|0	0|0|0	0|0|0	0|0|0	0|0|0	0|0|0	0|0|0	2|392|510	0|0|0	0|0|0	0|0|0	0|0|0	0|0|0	0|0|0	0|0|0	0|0|0	0|0|0	0|0|0	0|0|0	0|0|0	0|0|0	0|0|0	0|0|0	0|0|0	0|0|0	2|136|1470	0|0|0	0|0|0	0|0|0	1|196|510	0|0|0	0|0|0	0|0|0	0|0|0	0|0|0	0|0|0	0|0|0	1|8321|12	0|0|0	0|0|0	0|0|0	0|0|0	0|0|0	0|0|0	0|0|0	0|0|0	2|5|40000
21	1|659|151	0|0|0	0|0|0	0|0|0	0|0|0	0|0|0	0|0|0	0|0|0	0|0|0	0|0|0	0|0|0	0|0|0	0|0|0	0|0|0	0|0|0	0|0|0	0|0|0	1|953|104	0|0|0	0|0|0	0|0|0	0|0|0	0|0|0	0|0|0	0|0|0	0|0|0	0|0|0	0|0|0	0|0|0	0|0|0	0|0|0	2|212|943	0|0|0	0|0|0	0|0|0	0|0|0	0|0|0	0|0|0	0|0|0	2|8716|22	0|0|0	0|0|0	0|0|0	0|0|0	0|0|0	0|0|0	0|0|0	0|0|0	0|0|0
22	0|0|0	1|288|347	0|0|0	0|0|0	0|0|0	0|0|0	0|0|0	0|0|0	0|0|0	0|0|0	0|0|0	0|0|0	0|0|0	0|0|0	0|0|0	0|0|0	0|0|0	0|0|0	0|0|0	0|0|0	0|0|0	0|0|0	0|0|0	0|0|0	0|0|0	0|0|0	0|0|0	0|0|0	0|0|0	0|0|0	0|0|0	0|0|0	0|0|0	0|0|0	0|0|0	0|0|0	0|0|0	0|0|0	0|0|0	0|0|0	0|0|0	0|0|0	0|0|0	0|0|0	0|0|0	0|0|0	0|0|0	0|0|0	0|0|0
23	0|0|0	0|0|0	0|0|0	0|0|0	0|0|0	0|0|0	0|0|0	0|0|0	0|0|0	0|0|0	0|0|0	0|0|0	0|0|0	0|0|0	0|0|0	0|0|0	0|0|0	0|0|0	0|0|0	0|0|0	0|0|0	0|0|0	0|0|0	0|0|0	0|0|0	0|0|0	0|0|0	0|0|0	0|0|0	0|0|0	0|0|0	4|211|1895	0|0|0	0|0|0	0|0|0	0|0|0	0|0|0	1|205|487	1|68|1470	1|10291|9	0|0|0	0|0|0	0|0|0	0|0|0	0|0|0	0|0|0	0|0|0	0|0|0	0|0|0
24	0|0|0	0|0|0	0|0|0	0|0|0	0|0|0	0|0|0	0|0|0	0|0|0	0|0|0	0|0|0	0|0|0	0|0|0	0|0|0	0|0|0	0|0|0	0|0|0	0|0|0	0|0|0	0|0|0	0|0|0	0|0|0	0|0|0	0|0|0	0|0|0	0|0|0	0|0|0	0|0|0	0|0|0	0|0|0	0|0|0	0|0|0	1|209|478	0|0|0	0|0|0	0|0|0	0|0|0	0|0|0	0|0|0	0|0|0	2|10985|18	0|0|0	0|0|0	0|0|0	0|0|0	1|90|1111	0|0|0	0|0|0	0|0|0	0|0|0
25	0|0|0	0|0|0	0|0|0	0|0|0	0|0|0	0|0|0	0|0|0	0|0|0	0|0|0	0|0|0	0|0|0	0|0|0	0|0|0	0|0|0	0|0|0	0|0|0	0|0|0	0|0|0	0|0|0	1|208|480	0|0|0	0|0|0	0|0|0	0|0|0	0|0|0	0|0|0	0|0|0	0|0|0	0|0|0	0|0|0	0|0|0	5|236|2118	0|0|0	0|0|0	0|0|0	0|0|0	0|0|0	1|175|571	0|0|0	1|11912|8	1|189|529	0|0|0	0|0|0	0|0|0	0|0|0	0|0|0	0|0|0	1|42|2380	0|0|0
26	0|0|0	0|0|0	0|0|0	0|0|0	1|65|1538	0|0|0	0|0|0	0|0|0	0|0|0	0|0|0	0|0|0	0|0|0	0|0|0	0|0|0	0|0|0	0|0|0	0|0|0	0|0|0	0|0|0	0|0|0	1|241|414	0|0|0	0|0|0	0|0|0	0|0|0	0|0|0	0|0|0	1|140|714	0|0|0	0|0|0	0|0|0	4|170|2352	0|0|0	0|0|0	0|0|0	0|0|0	0|0|0	0|0|0	0|0|0	3|12456|24	0|0|0	0|0|0	0|0|0	0|0|0	1|94|1063	1|91|1098	0|0|0	0|0|0	0|0|0
27	0|0|0	0|0|0	0|0|0	0|0|0	0|0|0	0|0|0	0|0|0	0|0|0	0|0|0	0|0|0	0|0|0	0|0|0	0|0|0	0|0|0	0|0|0	0|0|0	0|0|0	0|0|0	0|0|0	0|0|0	0|0|0	0|0|0	0|0|0	0|0|0	0|0|0	0|0|0	0|0|0	0|0|0	0|0|0	0|0|0	0|0|0	0|0|0	0|0|0	0|0|0	0|0|0	0|0|0	0|0|0	1|220|454	0|0|0	1|13197|7	1|233|429	0|0|0	0|0|0	0|0|0	0|0|0	0|0|0	0|0|0	0|0|0	0|0|0
28	0|0|0	0|0|0	0|0|0	0|0|0	0|0|0	0|0|0	0|0|0	0|0|0	0|0|0	1|189|529	0|0|0	0|0|0	0|0|0	0|0|0	0|0|0	0|0|0	0|0|0	1|138|724	0|0|0	0|0|0	0|0|0	0|0|0	0|0|0	0|0|0	0|0|0	0|0|0	0|0|0	0|0|0	0|0|0	0|0|0	0|0|0	0|0|0	0|0|0	0|0|0	0|0|0	0|0|0	0|0|0	1|184|543	0|0|0	1|13813|7	0|0|0	0|0|0	0|0|0	0|0|0	0|0|0	0|0|0	0|0|0	0|0|0	0|0|0
29	0|0|0	0|0|0	0|0|0	0|0|0	0|0|0	0|0|0	0|0|0	0|0|0	0|0|0	1|175|571	0|0|0	0|0|0	0|0|0	0|0|0	0|0|0	0|0|0	0|0|0	2|86|2325	0|0|0	0|0|0	0|0|0	0|0|0	0|0|0	0|0|0	0|0|0	0|0|0	0|0|0	0|0|0	0|0|0	0|0|0	0|0|0	0|0|0	0|0|0	0|0|0	0|0|0	0|0|0	0|0|0	0|0|0	0|0|0	1|14700|6	0|0|0	0|0|0	0|0|0	0|0|0	0|0|0	0|0|0	0|0|0	0|0|0	0|0|0
30	0|0|0	0|0|0	0|0|0	0|0|0	0|0|0	0|0|0	0|0|0	0|0|0	0|0|0	0|0|0	0|0|0	0|0|0	0|0|0	0|0|0	0|0|0	0|0|0	0|0|0	0|0|0	0|0|0	0|0|0	0|0|0	0|0|0	0|0|0	0|0|0	0|0|0	0|0|0	0|0|0	0|0|0	0|0|0	0|0|0	0|0|0	0|0|0	0|0|0	0|0|0	0|0|0	0|0|0	0|0|0	0|0|0	0|0|0	1|16084|6	0|0|0	0|0|0	0|0|0	0|0|0	0|0|0	0|0|0	0|0|0	1|18|5555	0|0|0
31	0|0|0	0|0|0	0|0|0	0|0|0	0|0|0	0|0|0	0|0|0	0|0|0	0|0|0	0|0|0	0|0|0	0|0|0	0|0|0	0|0|0	0|0|0	0|0|0	0|0|0	0|0|0	0|0|0	0|0|0	0|0|0	0|0|0	0|0|0	0|0|0	0|0|0	0|0|0	0|0|0	0|0|0	0|0|0	0|0|0	0|0|0	0|0|0	0|0|0	0|0|0	0|0|0	0|0|0	0|0|0	0|0|0	0|0|0	3|16291|18	0|0|0	0|0|0	0|0|0	0|0|0	0|0|0	0|0|0	0|0|0	0|0|0	0|0|0
32	0|0|0	0|0|0	0|0|0	0|0|0	0|0|0	0|0|0	0|0|0	0|0|0	0|0|0	0|0|0	0|0|0	0|0|0	0|0|0	0|0|0	0|0|0	0|0|0	0|0|0	0|0|0	0|0|0	0|0|0	0|0|0	1|109|917	0|0|0	0|0|0	0|0|0	0|0|0	0|0|0	0|0|0	0|0|0	0|0|0	0|0|0	0|0|0	0|0|0	0|0|0	0|0|0	0|0|0	0|0|0	0|0|0	0|0|0	2|16836|11	0|0|0	0|0|0	0|0|0	0|0|0	0|0|0	0|0|0	0|0|0	0|0|0	0|0|0
33	0|0|0	0|0|0	0|0|0	0|0|0	0|0|0	0|0|0	0|0|0	0|0|0	0|0|0	0|0|0	0|0|0	0|0|0	0|0|0	0|0|0	0|0|0	0|0|0	0|0|0	2|69|2898	0|0|0	0|0|0	0|0|0	0|0|0	0|0|0	0|0|0	0|0|0	0|0|0	0|0|0	0|0|0	0|0|0	0|0|0	0|0|0	0|0|0	0|0|0	0|0|0	0|0|0	0|0|0	0|0|0	0|0|0	0|0|0	1|17100|5	0|0|0	0|0|0	0|0|0	0|0|0	0|0|0	0|0|0	0|0|0	0|0|0	0|0|0
34	0|0|0	0|0|0	0|0|0	0|0|0	0|0|0	0|0|0	0|0|0	0|0|0	0|0|0	0|0|0	0|0|0	0|0|0	0|0|0	0|0|0	0|0|0	0|0|0	0|0|0	0|0|0	0|0|0	0|0|0	0|0|0	0|0|0	0|0|0	0|0|0	0|0|0	0|0|0	0|0|0	0|0|0	0|0|0	0|0|0	0|0|0	0|0|0	0|0|0	0|0|0	0|0|0	0|0|0	0|0|0	0|0|0	0|0|0	3|17194|17	0|0|0	0|0|0	0|0|0	0|0|0	0|0|0	0|0|0	0|0|0	0|0|0	0|0|0
35	1|862|116	0|0|0	0|0|0	0|0|0	0|0|0	0|0|0	0|0|0	0|0|0	0|0|0	0|0|0	0|0|0	0|0|0	0|0|0	0|0|0	0|0|0	0|0|0	0|0|0	0|0|0	0|0|0	0|0|0	0|0|0	0|0|0	0|0|0	0|0|0	0|0|0	0|0|0	0|0|0	0|0|0	0|0|0	0|0|0	0|0|0	0|0|0	0|0|0	0|0|0	0|0|0	0|0|0	0|0|0	0|0|0	0|0|0	1|17432|5	0|0|0	0|0|0	0|0|0	0|0|0	0|0|0	0|0|0	0|0|0	0|0|0	0|0|0
36	0|0|0	0|0|0	0|0|0	0|0|0	0|0|0	0|0|0	0|0|0	0|0|0	0|0|0	0|0|0	0|0|0	0|0|0	0|0|0	0|0|0	0|0|0	0|0|0	0|0|0	0|0|0	0|0|0	0|0|0	0|0|0	0|0|0	0|0|0	0|0|0	0|0|0	0|0|0	0|0|0	0|0|0	0|0|0	0|0|0	0|0|0	0|0|0	0|0|0	0|0|0	0|0|0	0|0|0	0|0|0	0|0|0	0|0|0	1|18013|5	0|0|0	0|0|0	0|0|0	0|0|0	0|0|0	0|0|0	0|0|0	0|0|0	0|0|0
37	0|0|0	0|0|0	0|0|0	0|0|0	0|0|0	0|0|0	0|0|0	0|0|0	0|0|0	0|0|0	0|0|0	0|0|0	0|0|0	0|0|0	0|0|0	0|0|0	0|0|0	0|0|0	0|0|0	0|0|0	0|0|0	0|0|0	0|0|0	0|0|0	0|0|0	0|0|0	0|0|0	0|0|0	0|0|0	0|0|0	0|0|0	0|0|0	0|0|0	0|0|0	0|0|0	0|0|0	0|0|0	0|0|0	0|0|0	2|18062|11	0|0|0	0|0|0	0|0|0	0|0|0	0|0|0	0|0|0	0|0|0	0|0|0	0|0|0
38	0|0|0	0|0|0	0|0|0	0|0|0	0|0|0	0|0|0	0|0|0	0|0|0	0|0|0	0|0|0	0|0|0	0|0|0	0|0|0	0|0|0	0|0|0	0|0|0	0|0|0	2|52|3846	0|0|0	0|0|0	0|0|0	0|0|0	0|0|0	0|0|0	0|0|0	1|21|4761	0|0|0	0|0|0	0|0|0	0|0|0	0|0|0	0|0|0	0|0|0	0|0|0	0|0|0	0|0|0	0|0|0	1|284|352	0|0|0	6|18168|33	0|0|0	0|0|0	0|0|0	0|0|0	0|0|0	0|0|0	0|0|0	0|0|0	0|0|0
39	0|0|0	0|0|0	0|0|0	0|0|0	0|0|0	0|0|0	0|0|0	0|0|0	0|0|0	0|0|0	0|0|0	0|0|0	1|11|9090	0|0|0	0|0|0	0|0|0	0|0|0	0|0|0	0|0|0	1|263|380	0|0|0	0|0|0	0|0|0	0|0|0	0|0|0	0|0|0	0|0|0	0|0|0	0|0|0	0|0|0	0|0|0	0|0|0	0|0|0	0|0|0	0|0|0	0|0|0	0|0|0	0|0|0	0|0|0	2|18319|10	0|0|0	0|0|0	0|0|0	0|0|0	0|0|0	0|0|0	0|0|0	0|0|0	0|0|0
40	0|0|0	0|0|0	0|0|0	0|0|0	0|0|0	0|0|0	0|0|0	0|0|0	0|0|0	0|0|0	0|0|0	0|0|0	0|0|0	0|0|0	0|0|0	0|0|0	0|0|0	1|51|1960	0|0|0	0|0|0	0|0|0	0|0|0	0|0|0	0|0|0	0|0|0	0|0|0	0|0|0	0|0|0	0|0|0	0|0|0	0|0|0	0|0|0	0|0|0	0|0|0	0|0|0	0|0|0	0|0|0	0|0|0	0|0|0	3|18257|16	0|0|0	0|0|0	0|0|0	0|0|0	0|0|0	0|0|0	0|0|0	0|0|0	0|0|0
41	0|0|0	0|0|0	0|0|0	0|0|0	0|0|0	0|0|0	0|0|0	0|0|0	0|0|0	0|0|0	0|0|0	0|0|0	0|0|0	0|0|0	0|0|0	0|0|0	0|0|0	1|41|2439	0|0|0	0|0|0	0|0|0	0|0|0	0|0|0	0|0|0	0|0|0	0|0|0	0|0|0	0|0|0	0|0|0	0|0|0	0|0|0	0|0|0	0|0|0	0|0|0	0|0|0	0|0|0	0|0|0	0|0|0	0|0|0	2|17858|11	0|0|0	0|0|0	0|0|0	0|0|0	0|0|0	0|0|0	0|0|0	0|0|0	0|0|0
42	0|0|0	0|0|0	0|0|0	0|0|0	0|0|0	0|0|0	0|0|0	0|0|0	0|0|0	0|0|0	0|0|0	0|0|0	0|0|0	0|0|0	0|0|0	0|0|0	0|0|0	0|0|0	0|0|0	0|0|0	0|0|0	0|0|0	0|0|0	0|0|0	0|0|0	0|0|0	0|0|0	0|0|0	0|0|0	0|0|0	0|0|0	0|0|0	0|0|0	0|0|0	0|0|0	0|0|0	0|0|0	0|0|0	0|0|0	2|17539|11	0|0|0	0|0|0	0|0|0	0|0|0	1|117|854	0|0|0	0|0|0	0|0|0	0|0|0
43	0|0|0	0|0|0	0|0|0	0|0|0	0|0|0	0|0|0	0|0|0	0|0|0	0|0|0	0|0|0	0|0|0	0|0|0	0|0|0	0|0|0	0|0|0	0|0|0	0|0|0	0|0|0	0|0|0	0|0|0	0|0|0	0|0|0	0|0|0	0|0|0	0|0|0	0|0|0	0|0|0	0|0|0	0|0|0	0|0|0	0|0|0	0|0|0	0|0|0	0|0|0	0|0|0	0|0|0	0|0|0	0|0|0	0|0|0	0|0|0	0|0|0	0|0|0	0|0|0	0|0|0	0|0|0	0|0|0	0|0|0	0|0|0	0|0|0
44	0|0|0	0|0|0	0|0|0	0|0|0	0|0|0	0|0|0	0|0|0	0|0|0	0|0|0	0|0|0	0|0|0	0|0|0	0|0|0	0|0|0	0|0|0	0|0|0	0|0|0	0|0|0	0|0|0	0|0|0	0|0|0	0|0|0	0|0|0	0|0|0	0|0|0	0|0|0	0|0|0	0|0|0	0|0|0	0|0|0	0|0|0	0|0|0	0|0|0	0|0|0	0|0|0	0|0|0	0|0|0	0|0|0	0|0|0	1|17133|5	0|0|0	0|0|0	0|0|0	0|0|0	0|0|0	0|0|0	0|0|0	0|0|0	0|0|0
45	0|0|0	0|0|0	0|0|0	0|0|0	0|0|0	0|0|0	0|0|0	0|0|0	0|0|0	0|0|0	0|0|0	0|0|0	0|0|0	0|0|0	0|0|0	0|0|0	0|0|0	0|0|0	0|0|0	0|0|0	0|0|0	0|0|0	0|0|0	0|0|0	0|0|0	0|0|0	0|0|0	0|0|0	0|0|0	0|0|0	0|0|0	0|0|0	0|0|0	0|0|0	0|0|0	0|0|0	0|0|0	0|0|0	0|0|0	2|17148|11	0|0|0	0|0|0	0|0|0	0|0|0	0|0|0	0|0|0	0|0|0	0|0|0	0|0|0
46	0|0|0	0|0|0	0|0|0	0|0|0	0|0|0	0|0|0	0|0|0	0|0|0	0|0|0	0|0|0	0|0|0	0|0|0	0|0|0	0|0|0	0|0|0	0|0|0	0|0|0	0|0|0	0|0|0	0|0|0	0|0|0	0|0|0	0|0|0	0|0|0	0|0|0	0|0|0	0|0|0	0|0|0	0|0|0	0|0|0	0|0|0	0|0|0	0|0|0	0|0|0	0|0|0	0|0|0	0|0|0	0|0|0	0|0|0	1|17307|5	0|0|0	0|0|0	0|0|0	0|0|0	0|0|0	0|0|0	0|0|0	0|0|0	0|0|0
47	0|0|0	0|0|0	0|0|0	0|0|0	0|0|0	0|0|0	0|0|0	0|0|0	0|0|0	0|0|0	0|0|0	0|0|0	0|0|0	0|0|0	0|0|0	0|0|0	0|0|0	0|0|0	0|0|0	0|0|0	0|0|0	0|0|0	0|0|0	0|0|0	0|0|0	0|0|0	0|0|0	0|0|0	0|0|0	0|0|0	0|0|0	0|0|0	0|0|0	0|0|0	0|0|0	0|0|0	0|0|0	0|0|0	0|0|0	5|17012|29	0|0|0	0|0|0	0|0|0	0|0|0	0|0|0	0|0|0	0|0|0	0|0|0	0|0|0
48	0|0|0	0|0|0	0|0|0	0|0|0	0|0|0	0|0|0	0|0|0	0|0|0	0|0|0	0|0|0	0|0|0	0|0|0	0|0|0	0|0|0	0|0|0	0|0|0	0|0|0	0|0|0	0|0|0	0|0|0	0|0|0	0|0|0	0|0|0	0|0|0	0|0|0	0|0|0	0|0|0	0|0|0	0|0|0	0|0|0	0|0|0	0|0|0	0|0|0	0|0|0	0|0|0	0|0|0	0|0|0	0|0|0	0|0|0	0|0|0	0|0|0	0|0|0	0|0|0	0|0|0	0|0|0	0|0|0	0|0|0	0|0|0	0|0|0
49	0|0|0	0|0|0	0|0|0	0|0|0	0|0|0	0|0|0	0|0|0	0|0|0	0|0|0	0|0|0	0|0|0	0|0|0	0|0|0	0|0|0	0|0|0	0|0|0	0|0|0	0|0|0	0|0|0	4|329|1215	0|0|0	0|0|0	0|0|0	0|0|0	0|0|0	0|0|0	0|0|0	0|0|0	0|0|0	0|0|0	0|0|0	0|0|0	0|0|0	0|0|0	0|0|0	0|0|0	0|0|0	1|250|400	0|0|0	0|0|0	0|0|0	0|0|0	0|0|0	0|0|0	0|0|0	0|0|0	0|0|0	0|0|0	0|0|0
50	0|0|0	0|0|0	0|0|0	0|0|0	0|0|0	0|0|0	0|0|0	0|0|0	0|0|0	0|0|0	0|0|0	0|0|0	0|0|0	0|0|0	0|0|0	0|0|0	0|0|0	0|0|0	0|0|0	0|0|0	0|0|0	0|0|0	0|0|0	0|0|0	0|0|0	0|0|0	0|0|0	0|0|0	0|0|0	0|0|0	0|0|0	0|0|0	0|0|0	0|0|0	0|0|0	0|0|0	0|0|0	0|0|0	0|0|0	0|0|0	0|0|0	0|0|0	0|0|0	0|0|0	0|0|0	0|0|0	0|0|0	0|0|0	0|0|0
51	0|0|0	0|0|0	0|0|0	0|0|0	0|0|0	0|0|0	0|0|0	0|0|0	0|0|0	0|0|0	0|0|0	0|0|0	0|0|0	0|0|0	0|0|0	0|0|0	0|0|0	0|0|0	0|0|0	0|0|0	0|0|0	0|0|0	0|0|0	0|0|0	0|0|0	0|0|0	0|0|0	0|0|0	0|0|0	1|102|980	0|0|0	0|0|0	0|0|0	0|0|0	0|0|0	0|0|0	0|0|0	0|0|0	0|0|0	0|0|0	0|0|0	0|0|0	0|0|0	0|0|0	0|0|0	0|0|0	0|0|0	0|0|0	0|0|0
52	0|0|0	0|0|0	0|0|0	0|0|0	0|0|0	0|0|0	0|0|0	0|0|0	0|0|0	0|0|0	0|0|0	0|0|0	0|0|0	0|0|0	0|0|0	0|0|0	0|0|0	0|0|0	0|0|0	0|0|0	0|0|0	0|0|0	0|0|0	0|0|0	0|0|0	0|0|0	0|0|0	0|0|0	0|0|0	0|0|0	0|0|0	0|0|0	0|0|0	0|0|0	0|0|0	0|0|0	0|0|0	0|0|0	0|0|0	2|18246|10	0|0|0	0|0|0	0|0|0	0|0|0	0|0|0	0|0|0	0|0|0	0|0|0	0|0|0
53	0|0|0	0|0|0	0|0|0	0|0|0	0|0|0	0|0|0	0|0|0	0|0|0	0|0|0	0|0|0	0|0|0	0|0|0	0|0|0	0|0|0	0|0|0	0|0|0	0|0|0	0|0|0	0|0|0	0|0|0	0|0|0	0|0|0	0|0|0	0|0|0	0|0|0	0|0|0	0|0|0	0|0|0	0|0|0	0|0|0	0|0|0	0|0|0	0|0|0	0|0|0	0|0|0	0|0|0	0|0|0	0|0|0	0|0|0	0|0|0	0|0|0	0|0|0	0|0|0	0|0|0	0|0|0	0|0|0	0|0|0	0|0|0	0|0|0
54	0|0|0	0|0|0	0|0|0	0|0|0	0|0|0	0|0|0	0|0|0	0|0|0	0|0|0	0|0|0	0|0|0	0|0|0	0|0|0	0|0|0	0|0|0	0|0|0	0|0|0	0|0|0	0|0|0	0|0|0	0|0|0	0|0|0	0|0|0	0|0|0	1|1723|58	0|0|0	0|0|0	0|0|0	0|0|0	0|0|0	0|0|0	0|0|0	0|0|0	0|0|0	0|0|0	0|0|0	0|0|0	0|0|0	0|0|0	0|0|0	0|0|0	0|0|0	0|0|0	0|0|0	0|0|0	0|0|0	0|0|0	0|0|0	0|0|0
55	0|0|0	0|0|0	0|0|0	0|0|0	0|0|0	0|0|0	0|0|0	0|0|0	0|0|0	0|0|0	0|0|0	0|0|0	0|0|0	0|0|0	0|0|0	0|0|0	0|0|0	0|0|0	0|0|0	0|0|0	0|0|0	0|0|0	0|0|0	0|0|0	0|0|0	0|0|0	0|0|0	0|0|0	0|0|0	0|0|0	0|0|0	0|0|0	0|0|0	0|0|0	0|0|0	0|0|0	0|0|0	0|0|0	0|0|0	0|0|0	0|0|0	0|0|0	0|0|0	0|0|0	0|0|0	0|0|0	0|0|0	0|0|0	0|0|0
56	0|0|0	0|0|0	0|0|0	0|0|0	0|0|0	0|0|0	0|0|0	0|0|0	0|0|0	0|0|0	0|0|0	0|0|0	0|0|0	0|0|0	0|0|0	0|0|0	0|0|0	0|0|0	0|0|0	0|0|0	0|0|0	0|0|0	0|0|0	0|0|0	0|0|0	0|0|0	0|0|0	0|0|0	0|0|0	0|0|0	0|0|0	0|0|0	0|0|0	0|0|0	0|0|0	0|0|0	0|0|0	0|0|0	0|0|0	4|18692|21	0|0|0	0|0|0	0|0|0	0|0|0	0|0|0	0|0|0	0|0|0	0|0|0	0|0|0
57	0|0|0	0|0|0	0|0|0	0|0|0	0|0|0	0|0|0	0|0|0	0|0|0	0|0|0	0|0|0	0|0|0	0|0|0	0|0|0	0|0|0	0|0|0	0|0|0	0|0|0	0|0|0	0|0|0	0|0|0	0|0|0	0|0|0	0|0|0	0|0|0	0|0|0	0|0|0	0|0|0	0|0|0	0|0|0	0|0|0	0|0|0	0|0|0	0|0|0	0|0|0	0|0|0	0|0|0	0|0|0	0|0|0	0|0|0	1|18642|5	0|0|0	0|0|0	0|0|0	0|0|0	0|0|0	0|0|0	0|0|0	0|0|0	0|0|0
58	0|0|0	0|0|0	0|0|0	0|0|0	0|0|0	0|0|0	0|0|0	0|0|0	0|0|0	0|0|0	0|0|0	0|0|0	0|0|0	0|0|0	0|0|0	0|0|0	0|0|0	0|0|0	0|0|0	0|0|0	0|0|0	0|0|0	0|0|0	0|0|0	1|2070|48	0|0|0	0|0|0	0|0|0	0|0|0	0|0|0	0|0|0	0|0|0	0|0|0	0|0|0	0|0|0	0|0|0	0|0|0	0|0|0	0|0|0	3|18348|16	0|0|0	0|0|0	0|0|0	0|0|0	0|0|0	0|0|0	0|0|0	0|0|0	0|0|0
59	0|0|0	0|0|0	0|0|0	0|0|0	0|0|0	0|0|0	0|0|0	0|0|0	0|0|0	0|0|0	0|0|0	0|0|0	0|0|0	0|0|0	0|0|0	0|0|0	0|0|0	0|0|0	0|0|0	0|0|0	0|0|0	0|0|0	0|0|0	0|0|0	0|0|0	0|0|0	0|0|0	0|0|0	0|0|0	0|0|0	0|0|0	0|0|0	0|0|0	0|0|0	0|0|0	0|0|0	0|0|0	0|0|0	0|0|0	2|18563|10	0|0|0	0|0|0	0|0|0	0|0|0	0|0|0	0|0|0	0|0|0	0|0|0	0|0|0
60	0|0|0	0|0|0	0|0|0	0|0|0	0|0|0	0|0|0	0|0|0	0|0|0	0|0|0	0|0|0	0|0|0	0|0|0	0|0|0	0|0|0	0|0|0	0|0|0	1|451|221	0|0|0	0|0|0	0|0|0	0|0|0	0|0|0	0|0|0	0|0|0	1|5178|19	0|0|0	0|0|0	0|0|0	1|1008|99	0|0|0	0|0|0	0|0|0	0|0|0	0|0|0	0|0|0	0|0|0	0|0|0	0|0|0	0|0|0	0|0|0	0|0|0	0|0|0	0|0|0	0|0|0	0|0|0	0|0|0	0|0|0	0|0|0	0|0|0
61	0|0|0	0|0|0	0|0|0	0|0|0	0|0|0	0|0|0	0|0|0	0|0|0	0|0|0	0|0|0	0|0|0	0|0|0	0|0|0	0|0|0	0|0|0	0|0|0	0|0|0	0|0|0	0|0|0	0|0|0	0|0|0	0|0|0	0|0|0	0|0|0	0|0|0	0|0|0	0|0|0	0|0|0	0|0|0	0|0|0	0|0|0	0|0|0	0|0|0	0|0|0	0|0|0	0|0|0	0|0|0	0|0|0	0|0|0	1|17914|5	0|0|0	0|0|0	0|0|0	0|0|0	0|0|0	0|0|0	0|0|0	0|0|0	0|0|0
62	0|0|0	0|0|0	0|0|0	0|0|0	0|0|0	0|0|0	0|0|0	0|0|0	0|0|0	0|0|0	0|0|0	0|0|0	0|0|0	0|0|0	0|0|0	0|0|0	0|0|0	0|0|0	0|0|0	0|0|0	0|0|0	0|0|0	0|0|0	0|0|0	0|0|0	0|0|0	0|0|0	0|0|0	1|908|110	0|0|0	0|0|0	0|0|0	0|0|0	0|0|0	0|0|0	0|0|0	0|0|0	0|0|0	0|0|0	1|17500|5	0|0|0	0|0|0	0|0|0	0|0|0	0|0|0	0|0|0	0|0|0	0|0|0	0|0|0
63	0|0|0	0|0|0	1|20|5000	0|0|0	0|0|0	0|0|0	0|0|0	0|0|0	0|0|0	0|0|0	0|0|0	0|0|0	0|0|0	0|0|0	0|0|0	0|0|0	0|0|0	0|0|0	0|0|0	0|0|0	0|0|0	0|0|0	0|0|0	0|0|0	0|0|0	0|0|0	0|0|0	0|0|0	1|933|107	0|0|0	0|0|0	0|0|0	0|0|0	0|0|0	0|0|0	0|0|0	0|0|0	0|0|0	0|0|0	2|17448|11	0|0|0	0|0|0	0|0|0	0|0|0	0|0|0	0|0|0	0|0|0	0|0|0	0|0|0
64	0|0|0	0|0|0	0|0|0	0|0|0	0|0|0	0|0|0	0|0|0	0|0|0	0|0|0	0|0|0	0|0|0	0|0|0	0|0|0	0|0|0	0|0|0	0|0|0	0|0|0	0|0|0	0|0|0	0|0|0	0|0|0	0|0|0	0|0|0	0|0|0	0|0|0	0|0|0	0|0|0	0|0|0	0|0|0	0|0|0	0|0|0	0|0|0	0|0|0	0|0|0	0|0|0	0|0|0	0|0|0	0|0|0	0|0|0	2|17055|11	0|0|0	0|0|0	0|0|0	0|0|0	0|0|0	0|0|0	0|0|0	0|0|0	0|0|0
65	0|0|0	0|0|0	0|0|0	0|0|0	0|0|0	0|0|0	0|0|0	0|0|0	0|0|0	0|0|0	0|0|0	0|0|0	0|0|0	0|0|0	0|0|0	0|0|0	0|0|0	0|0|0	0|0|0	1|516|193	0|0|0	0|0|0	0|0|0	0|0|0	0|0|0	1|1477|67	0|0|0	0|0|0	3|3208|93	0|0|0	0|0|0	0|0|0	0|0|0	0|0|0	0|0|0	0|0|0	0|0|0	0|0|0	0|0|0	2|18507|10	0|0|0	0|0|0	0|0|0	0|0|0	0|0|0	0|0|0	0|0|0	0|0|0	0|0|0
66	0|0|0	0|0|0	0|0|0	0|0|0	0|0|0	0|0|0	0|0|0	0|0|0	0|0|0	0|0|0	0|0|0	0|0|0	0|0|0	0|0|0	0|0|0	0|0|0	0|0|0	0|0|0	0|0|0	0|0|0	0|0|0	0|0|0	0|0|0	0|0|0	0|0|0	0|0|0	0|0|0	0|0|0	0|0|0	0|0|0	0|0|0	0|0|0	0|0|0	0|0|0	0|0|0	0|0|0	0|0|0	0|0|0	0|0|0	1|17752|5	0|0|0	1|124|806	0|0|0	0|0|0	0|0|0	0|0|0	0|0|0	0|0|0	0|0|0
67	0|0|0	0|0|0	0|0|0	0|0|0	0|0|0	0|0|0	0|0|0	0|0|0	0|0|0	0|0|0	0|0|0	0|0|0	0|0|0	0|0|0	0|0|0	0|0|0	0|0|0	0|0|0	0|0|0	2|436|458	0|0|0	0|0|0	0|0|0	0|0|0	0|0|0	0|0|0	0|0|0	0|0|0	1|2592|38	0|0|0	0|0|0	0|0|0	0|0|0	0|0|0	0|0|0	0|0|0	0|0|0	0|0|0	0|0|0	3|17200|17	0|0|0	0|0|0	0|0|0	0|0|0	0|0|0	0|0|0	0|0|0	0|0|0	0|0|0
68	0|0|0	0|0|0	0|0|0	0|0|0	0|0|0	0|0|0	0|0|0	0|0|0	0|0|0	0|0|0	0|0|0	0|0|0	0|0|0	0|0|0	0|0|0	0|0|0	0|0|0	0|0|0	0|0|0	0|0|0	0|0|0	0|0|0	0|0|0	0|0|0	0|0|0	1|547|182	0|0|0	0|0|0	0|0|0	0|0|0	0|0|0	0|0|0	0|0|0	0|0|0	0|0|0	0|0|0	0|0|0	0|0|0	0|0|0	0|0|0	0|0|0	0|0|0	0|0|0	0|0|0	0|0|0	0|0|0	0|0|0	0|0|0	0|0|0
69	0|0|0	0|0|0	0|0|0	0|0|0	0|0|0	0|0|0	0|0|0	0|0|0	0|0|0	0|0|0	0|0|0	0|0|0	0|0|0	0|0|0	0|0|0	0|0|0	0|0|0	0|0|0	0|0|0	0|0|0	0|0|0	0|0|0	0|0|0	0|0|0	0|0|0	0|0|0	0|0|0	0|0|0	0|0|0	0|0|0	0|0|0	0|0|0	0|0|0	0|0|0	0|0|0	0|0|0	0|0|0	1|333|300	0|0|0	2|16173|12	0|0|0	0|0|0	0|0|0	0|0|0	0|0|0	0|0|0	0|0|0	0|0|0	0|0|0
70	0|0|0	0|0|0	0|0|0	0|0|0	0|0|0	0|0|0	0|0|0	0|0|0	0|0|0	0|0|0	0|0|0	0|0|0	0|0|0	0|0|0	0|0|0	0|0|0	0|0|0	0|0|0	0|0|0	0|0|0	0|0|0	0|0|0	0|0|0	0|0|0	0|0|0	0|0|0	0|0|0	0|0|0	1|1790|55	0|0|0	0|0|0	0|0|0	0|0|0	0|0|0	0|0|0	0|0|0	0|0|0	0|0|0	0|0|0	1|15686|6	0|0|0	0|0|0	0|0|0	0|0|0	0|0|0	0|0|0	0|0|0	0|0|0	0|0|0
71	0|0|0	0|0|0	0|0|0	0|0|0	0|0|0	0|0|0	0|0|0	0|0|0	0|0|0	0|0|0	0|0|0	0|0|0	0|0|0	0|0|0	0|0|0	0|0|0	0|0|0	0|0|0	0|0|0	0|0|0	0|0|0	0|0|0	0|0|0	0|0|0	0|0|0	0|0|0	0|0|0	0|0|0	0|0|0	0|0|0	0|0|0	0|0|0	0|0|0	0|0|0	0|0|0	0|0|0	0|0|0	0|0|0	0|0|0	3|15057|19	0|0|0	0|0|0	0|0|0	0|0|0	0|0|0	0|0|0	0|0|0	0|0|0	0|0|0
72	0|0|0	0|0|0	0|0|0	0|0|0	0|0|0	0|0|0	0|0|0	0|0|0	0|0|0	0|0|0	0|0|0	0|0|0	0|0|0	1|1590|62	0|0|0	0|0|0	0|0|0	0|0|0	0|0|0	0|0|0	0|0|0	0|0|0	0|0|0	0|0|0	0|0|0	0|0|0	0|0|0	0|0|0	0|0|0	0|0|0	0|0|0	0|0|0	1|476|210	0|0|0	0|0|0	0|0|0	0|0|0	0|0|0	0|0|0	4|14426|27	0|0|0	0|0|0	0|0|0	0|0|0	0|0|0	0|0|0	0|0|0	0|0|0	0|0|0
73	0|0|0	0|0|0	0|0|0	0|0|0	0|0|0	0|0|0	0|0|0	0|0|0	0|0|0	0|0|0	0|0|0	0|0|0	0|0|0	0|0|0	0|0|0	0|0|0	0|0|0	0|0|0	0|0|0	0|0|0	0|0|0	0|0|0	0|0|0	0|0|0	0|0|0	0|0|0	0|0|0	0|0|0	0|0|0	0|0|0	0|0|0	0|0|0	0|0|0	0|0|0	0|0|0	0|0|0	0|0|0	0|0|0	0|0|0	2|14364|13	0|0|0	0|0|0	0|0|0	0|0|0	0|0|0	0|0|0	0|0|0	0|0|0	0|0|0
74	0|0|0	0|0|0	0|0|0	0|0|0	0|0|0	0|0|0	0|0|0	0|0|0	0|0|0	0|0|0	0|0|0	0|0|0	0|0|0	0|0|0	0|0|0	0|0|0	0|0|0	0|0|0	0|0|0	0|0|0	0|0|0	0|0|0	0|0|0	0|0|0	0|0|0	0|0|0	0|0|0	0|0|0	0|0|0	0|0|0	0|0|0	0|0|0	0|0|0	0|0|0	0|0|0	0|0|0	0|0|0	0|0|0	0|0|0	1|13852|7	0|0|0	0|0|0	0|0|0	0|0|0	0|0|0	0|0|0	0|0|0	0|0|0	0|0|0
75	0|0|0	0|0|0	0|0|0	0|0|0	0|0|0	1|8|12500	0|0|0	0|0|0	0|0|0	0|0|0	0|0|0	0|0|0	0|0|0	1|1215|82	0|0|0	0|0|0	0|0|0	0|0|0	0|0|0	0|0|0	0|0|0	0|0|0	0|0|0	0|0|0	1|1682|59	0|0|0	0|0|0	0|0|0	0|0|0	0|0|0	0|0|0	0|0|0	0|0|0	0|0|0	0|0|0	0|0|0	0|0|0	0|0|0	0|0|0	2|11541|17	1|827|120	0|0|0	0|0|0	0|0|0	0|0|0	0|0|0	0|0|0	0|0|0	0|0|0
76	0|0|0	0|0|0	0|0|0	0|0|0	0|0|0	0|0|0	0|0|0	0|0|0	0|0|0	0|0|0	0|0|0	0|0|0	0|0|0	0|0|0	0|0|0	0|0|0	0|0|0	0|0|0	0|0|0	0|0|0	0|0|0	0|0|0	0|0|0	0|0|0	0|0|0	0|0|0	0|0|0	0|0|0	0|0|0	0|0|0	0|0|0	0|0|0	0|0|0	0|0|0	0|0|0	1|101|990	0|0|0	0|0|0	0|0|0	2|10516|19	0|0|0	0|0|0	0|0|0	0|0|0	0|0|0	0|0|0	0|0|0	0|0|0	0|0|0
77	0|0|0	0|0|0	0|0|0	0|0|0	0|0|0	0|0|0	0|0|0	0|0|0	0|0|0	0|0|0	0|0|0	0|0|0	0|0|0	0|0|0	0|0|0	0|0|0	0|0|0	0|0|0	0|0|0	0|0|0	0|0|0	0|0|0	0|0|0	0|0|0	0|0|0	0|0|0	0|0|0	0|0|0	1|827|120	0|0|0	0|0|0	0|0|0	0|0|0	0|0|0	0|0|0	1|111|900	0|0|0	0|0|0	0|0|0	2|10046|19	0|0|0	0|0|0	0|0|0	0|0|0	0|0|0	0|0|0	0|0|0	0|0|0	0|0|0
78	0|0|0	0|0|0	0|0|0	0|0|0	0|0|0	0|0|0	0|0|0	0|0|0	0|0|0	0|0|0	0|0|0	0|0|0	0|0|0	0|0|0	0|0|0	0|0|0	0|0|0	0|0|0	0|0|0	0|0|0	0|0|0	0|0|0	0|0|0	0|0|0	0|0|0	0|0|0	0|0|0	0|0|0	0|0|0	0|0|0	0|0|0	0|0|0	0|0|0	0|0|0	0|0|0	0|0|0	0|0|0	0|0|0	0|0|0	1|9889|10	0|0|0	0|0|0	0|0|0	0|0|0	0|0|0	0|0|0	0|0|0	0|0|0	0|0|0
79	0|0|0	0|0|0	0|0|0	0|0|0	0|0|0	0|0|0	0|0|0	0|0|0	0|0|0	0|0|0	0|0|0	0|0|0	0|0|0	0|0|0	0|0|0	0|0|0	0|0|0	0|0|0	0|0|0	0|0|0	0|0|0	0|0|0	0|0|0	0|0|0	0|0|0	0|0|0	0|0|0	0|0|0	0|0|0	0|0|0	0|0|0	0|0|0	0|0|0	0|0|0	0|0|0	0|0|0	0|0|0	0|0|0	0|0|0	0|0|0	0|0|0	0|0|0	0|0|0	0|0|0	0|0|0	0|0|0	0|0|0	0|0|0	0|0|0
80	0|0|0	0|0|0	0|0|0	0|0|0	0|0|0	0|0|0	0|0|0	0|0|0	0|0|0	0|0|0	0|0|0	0|0|0	0|0|0	0|0|0	0|0|0	0|0|0	0|0|0	0|0|0	0|0|0	0|0|0	0|0|0	0|0|0	0|0|0	0|0|0	0|0|0	0|0|0	0|0|0	0|0|0	0|0|0	0|0|0	0|0|0	0|0|0	0|0|0	0|0|0	0|0|0	0|0|0	0|0|0	0|0|0	0|0|0	0|0|0	0|0|0	0|0|0	0|0|0	0|0|0	0|0|0	0|0|0	0|0|0	0|0|0	0|0|0
81	0|0|0	0|0|0	0|0|0	0|0|0	0|0|0	0|0|0	0|0|0	0|0|0	0|0|0	0|0|0	0|0|0	0|0|0	0|0|0	0|0|0	0|0|0	0|0|0	0|0|0	0|0|0	0|0|0	0|0|0	0|0|0	0|0|0	0|0|0	0|0|0	0|0|0	0|0|0	0|0|0	0|0|0	0|0|0	0|0|0	0|0|0	0|0|0	0|0|0	0|0|0	0|0|0	0|0|0	0|0|0	0|0|0	0|0|0	0|0|0	0|0|0	0|0|0	0|0|0	0|0|0	0|0|0	0|0|0	0|0|0	0|0|0	0|0|0
82	0|0|0	0|0|0	0|0|0	0|0|0	0|0|0	0|0|0	0|0|0	0|0|0	0|0|0	0|0|0	0|0|0	0|0|0	0|0|0	0|0|0	0|0|0	0|0|0	0|0|0	0|0|0	0|0|0	0|0|0	0|0|0	0|0|0	0|0|0	0|0|0	0|0|0	0|0|0	0|0|0	0|0|0	0|0|0	0|0|0	0|0|0	0|0|0	0|0|0	0|0|0	0|0|0	0|0|0	0|0|0	0|0|0	0|0|0	0|0|0	0|0|0	0|0|0	0|0|0	0|0|0	0|0|0	0|0|0	0|0|0	0|0|0	0|0|0
83	0|0|0	0|0|0	0|0|0	0|0|0	0|0|0	0|0|0	0|0|0	0|0|0	0|0|0	0|0|0	0|0|0	0|0|0	0|0|0	0|0|0	0|0|0	0|0|0	0|0|0	0|0|0	0|0|0	0|0|0	0|0|0	0|0|0	0|0|0	0|0|0	0|0|0	0|0|0	0|0|0	0|0|0	0|0|0	0|0|0	0|0|0	0|0|0	0|0|0	0|0|0	0|0|0	0|0|0	0|0|0	0|0|0	0|0|0	0|0|0	0|0|0	0|0|0	0|0|0	0|0|0	0|0|0	0|0|0	0|0|0	0|0|0	0|0|0
84	0|0|0	0|0|0	0|0|0	0|0|0	0|0|0	0|0|0	0|0|0	0|0|0	0|0|0	0|0|0	0|0|0	0|0|0	0|0|0	0|0|0	0|0|0	0|0|0	0|0|0	0|0|0	0|0|0	0|0|0	0|0|0	0|0|0	0|0|0	0|0|0	0|0|0	0|0|0	0|0|0	0|0|0	0|0|0	0|0|0	0|0|0	0|0|0	0|0|0	0|0|0	0|0|0	0|0|0	0|0|0	0|0|0	0|0|0	0|0|0	0|0|0	0|0|0	0|0|0	0|0|0	0|0|0	0|0|0	0|0|0	0|0|0	0|0|0
85	0|0|0	0|0|0	0|0|0	0|0|0	0|0|0	0|0|0	0|0|0	0|0|0	0|0|0	0|0|0	0|0|0	0|0|0	0|0|0	0|0|0	0|0|0	0|0|0	0|0|0	0|0|0	0|0|0	0|0|0	0|0|0	0|0|0	0|0|0	0|0|0	0|0|0	0|0|0	0|0|0	0|0|0	0|0|0	0|0|0	0|0|0	0|0|0	0|0|0	0|0|0	0|0|0	0|0|0	0|0|0	0|0|0	0|0|0	0|0|0	0|0|0	0|0|0	0|0|0	0|0|0	0|0|0	0|0|0	0|0|0	0|0|0	0|0|0
86	0|0|0	0|0|0	0|0|0	0|0|0	0|0|0	0|0|0	0|0|0	0|0|0	0|0|0	0|0|0	0|0|0	0|0|0	0|0|0	0|0|0	0|0|0	0|0|0	0|0|0	0|0|0	0|0|0	0|0|0	0|0|0	0|0|0	0|0|0	0|0|0	0|0|0	0|0|0	0|0|0	0|0|0	0|0|0	0|0|0	0|0|0	0|0|0	0|0|0	0|0|0	0|0|0	0|0|0	0|0|0	0|0|0	0|0|0	0|0|0	0|0|0	0|0|0	0|0|0	0|0|0	0|0|0	0|0|0	0|0|0	0|0|0	0|0|0
87	0|0|0	0|0|0	0|0|0	0|0|0	0|0|0	0|0|0	0|0|0	0|0|0	0|0|0	0|0|0	0|0|0	0|0|0	0|0|0	0|0|0	0|0|0	0|0|0	0|0|0	0|0|0	0|0|0	0|0|0	0|0|0	0|0|0	0|0|0	0|0|0	0|0|0	0|0|0	0|0|0	0|0|0	0|0|0	0|0|0	0|0|0	0|0|0	0|0|0	0|0|0	0|0|0	0|0|0	0|0|0	0|0|0	0|0|0	0|0|0	0|0|0	0|0|0	0|0|0	0|0|0	0|0|0	0|0|0	0|0|0	0|0|0	0|0|0
88	0|0|0	0|0|0	0|0|0	0|0|0	0|0|0	0|0|0	0|0|0	0|0|0	0|0|0	0|0|0	0|0|0	0|0|0	0|0|0	0|0|0	0|0|0	0|0|0	0|0|0	0|0|0	0|0|0	0|0|0	0|0|0	0|0|0	0|0|0	0|0|0	0|0|0	0|0|0	0|0|0	0|0|0	0|0|0	0|0|0	0|0|0	0|0|0	0|0|0	0|0|0	0|0|0	0|0|0	0|0|0	0|0|0	0|0|0	1|3313|30	0|0|0	0|0|0	0|0|0	0|0|0	0|0|0	0|0|0	0|0|0	0|0|0	0|0|0
89	0|0|0	0|0|0	0|0|0	0|0|0	0|0|0	0|0|0	0|0|0	0|0|0	0|0|0	0|0|0	0|0|0	0|0|0	0|0|0	0|0|0	0|0|0	0|0|0	0|0|0	0|0|0	0|0|0	0|0|0	0|0|0	0|0|0	0|0|0	0|0|0	0|0|0	0|0|0	0|0|0	0|0|0	0|0|0	0|0|0	0|0|0	0|0|0	0|0|0	0|0|0	0|0|0	0|0|0	0|0|0	0|0|0	0|0|0	0|0|0	0|0|0	0|0|0	0|0|0	0|0|0	0|0|0	0|0|0	0|0|0	0|0|0	0|0|0
90	0|0|0	0|0|0	0|0|0	0|0|0	0|0|0	0|0|0	0|0|0	0|0|0	0|0|0	0|0|0	0|0|0	0|0|0	0|0|0	0|0|0	0|0|0	0|0|0	0|0|0	0|0|0	0|0|0	0|0|0	0|0|0	0|0|0	0|0|0	0|0|0	0|0|0	0|0|0	0|0|0	0|0|0	0|0|0	0|0|0	0|0|0	0|0|0	0|0|0	0|0|0	0|0|0	0|0|0	0|0|0	0|0|0	0|0|0	1|2722|36	0|0|0	0|0|0	0|0|0	0|0|0	0|0|0	0|0|0	0|0|0	0|0|0	0|0|0
91	0|0|0	0|0|0	0|0|0	0|0|0	0|0|0	0|0|0	0|0|0	0|0|0	0|0|0	0|0|0	0|0|0	0|0|0	0|0|0	0|0|0	0|0|0	0|0|0	0|0|0	0|0|0	0|0|0	0|0|0	0|0|0	0|0|0	0|0|0	0|0|0	0|0|0	0|0|0	0|0|0	0|0|0	0|0|0	0|0|0	0|0|0	0|0|0	0|0|0	0|0|0	0|0|0	0|0|0	0|0|0	0|0|0	0|0|0	0|0|0	0|0|0	0|0|0	0|0|0	0|0|0	0|0|0	0|0|0	0|0|0	0|0|0	0|0|0
92	0|0|0	0|0|0	0|0|0	0|0|0	0|0|0	0|0|0	0|0|0	0|0|0	0|0|0	0|0|0	0|0|0	0|0|0	0|0|0	0|0|0	0|0|0	0|0|0	0|0|0	0|0|0	0|0|0	0|0|0	0|0|0	0|0|0	0|0|0	0|0|0	0|0|0	0|0|0	0|0|0	0|0|0	0|0|0	0|0|0	0|0|0	0|0|0	0|0|0	0|0|0	0|0|0	0|0|0	0|0|0	0|0|0	0|0|0	0|0|0	0|0|0	0|0|0	0|0|0	0|0|0	0|0|0	0|0|0	0|0|0	0|0|0	0|0|0
93	0|0|0	0|0|0	0|0|0	0|0|0	0|0|0	0|0|0	0|0|0	0|0|0	0|0|0	0|0|0	0|0|0	0|0|0	0|0|0	0|0|0	0|0|0	0|0|0	0|0|0	0|0|0	0|0|0	0|0|0	0|0|0	0|0|0	0|0|0	0|0|0	0|0|0	0|0|0	0|0|0	0|0|0	0|0|0	0|0|0	0|0|0	0|0|0	0|0|0	0|0|0	0|0|0	0|0|0	0|0|0	0|0|0	0|0|0	0|0|0	0|0|0	0|0|0	0|0|0	0|0|0	0|0|0	0|0|0	0|0|0	0|0|0	0|0|0
94	0|0|0	0|0|0	0|0|0	0|0|0	0|0|0	0|0|0	0|0|0	0|0|0	0|0|0	0|0|0	0|0|0	0|0|0	0|0|0	0|0|0	0|0|0	0|0|0	0|0|0	0|0|0	0|0|0	0|0|0	0|0|0	0|0|0	0|0|0	0|0|0	0|0|0	0|0|0	0|0|0	0|0|0	0|0|0	0|0|0	0|0|0	0|0|0	0|0|0	0|0|0	0|0|0	0|0|0	0|0|0	0|0|0	0|0|0	1|1244|80	0|0|0	0|0|0	0|0|0	0|0|0	0|0|0	0|0|0	0|0|0	0|0|0	0|0|0
95	0|0|0	0|0|0	0|0|0	0|0|0	0|0|0	0|0|0	0|0|0	0|0|0	0|0|0	0|0|0	0|0|0	0|0|0	0|0|0	0|0|0	0|0|0	0|0|0	0|0|0	0|0|0	0|0|0	0|0|0	0|0|0	0|0|0	0|0|0	0|0|0	0|0|0	0|0|0	0|0|0	0|0|0	0|0|0	0|0|0	0|0|0	0|0|0	0|0|0	0|0|0	0|0|0	0|0|0	0|0|0	0|0|0	0|0|0	0|0|0	0|0|0	0|0|0	0|0|0	0|0|0	0|0|0	0|0|0	0|0|0	0|0|0	0|0|0
96	0|0|0	0|0|0	0|0|0	0|0|0	0|0|0	0|0|0	0|0|0	0|0|0	0|0|0	0|0|0	0|0|0	0|0|0	0|0|0	0|0|0	0|0|0	0|0|0	0|0|0	0|0|0	0|0|0	0|0|0	0|0|0	0|0|0	0|0|0	0|0|0	0|0|0	0|0|0	0|0|0	0|0|0	0|0|0	0|0|0	0|0|0	0|0|0	0|0|0	0|0|0	0|0|0	0|0|0	0|0|0	0|0|0	0|0|0	0|0|0	0|0|0	0|0|0	0|0|0	0|0|0	0|0|0	0|0|0	0|0|0	0|0|0	0|0|0
97	0|0|0	0|0|0	0|0|0	0|0|0	0|0|0	0|0|0	0|0|0	0|0|0	0|0|0	0|0|0	0|0|0	0|0|0	0|0|0	0|0|0	0|0|0	0|0|0	0|0|0	0|0|0	0|0|0	0|0|0	0|0|0	0|0|0	0|0|0	0|0|0	0|0|0	0|0|0	0|0|0	0|0|0	0|0|0	0|0|0	0|0|0	0|0|0	0|0|0	0|0|0	0|0|0	0|0|0	0|0|0	0|0|0	0|0|0	0|0|0	0|0|0	0|0|0	0|0|0	0|0|0	0|0|0	0|0|0	0|0|0	0|0|0	0|0|0
98	0|0|0	0|0|0	0|0|0	0|0|0	0|0|0	0|0|0	0|0|0	0|0|0	0|0|0	0|0|0	0|0|0	0|0|0	0|0|0	0|0|0	0|0|0	0|0|0	0|0|0	0|0|0	0|0|0	0|0|0	0|0|0	0|0|0	0|0|0	0|0|0	0|0|0	0|0|0	0|0|0	0|0|0	0|0|0	0|0|0	0|0|0	0|0|0	0|0|0	0|0|0	0|0|0	0|0|0	0|0|0	0|0|0	0|0|0	0|0|0	0|0|0	0|0|0	0|0|0	0|0|0	0|0|0	0|0|0	0|0|0	0|0|0	0|0|0
99	0|0|0	0|0|0	0|0|0	0|0|0	0|0|0	0|0|0	0|0|0	0|0|0	0|0|0	0|0|0	0|0|0	0|0|0	0|0|0	0|0|0	0|0|0	0|0|0	0|0|0	0|0|0	0|0|0	0|0|0	0|0|0	0|0|0	0|0|0	0|0|0	0|0|0	0|0|0	0|0|0	0|0|0	0|0|0	0|0|0	0|0|0	0|0|0	0|0|0	0|0|0	0|0|0	0|0|0	0|0|0	0|0|0	0|0|0	0|0|0	0|0|0	0|0|0	0|0|0	0|0|0	0|0|0	0|0|0	0|0|0	0|0|0	0|0|0
100	0|0|0	0|0|0	0|0|0	0|0|0	0|0|0	0|0|0	0|0|0	0|0|0	0|0|0	0|0|0	0|0|0	0|0|0	0|0|0	0|0|0	0|0|0	0|0|0	0|0|0	0|0|0	0|0|0	0|0|0	0|0|0	0|0|0	0|0|0	0|0|0	0|0|0	0|0|0	0|0|0	0|0|0	0|0|0	0|0|0	0|0|0	0|0|0	0|0|0	0|0|0	0|0|0	0|0|0	0|0|0	0|0|0	0|0|0	0|0|0	0|0|0	0|0|0	0|0|0	0|0|0	0|0|0	0|0|0	0|0|0	0|0|0	0|0|0
101	0|0|0	0|0|0	0|0|0	0|0|0	0|0|0	0|0|0	0|0|0	0|0|0	0|0|0	0|0|0	0|0|0	0|0|0	0|0|0	0|0|0	0|0|0	0|0|0	0|0|0	0|0|0	0|0|0	0|0|0	0|0|0	0|0|0	0|0|0	0|0|0	0|0|0	0|0|0	0|0|0	0|0|0	0|0|0	0|0|0	0|0|0	0|0|0	0|0|0	0|0|0	0|0|0	0|0|0	0|0|0	0|0|0	0|0|0	0|0|0	0|0|0	0|0|0	0|0|0	0|0|0	0|0|0	0|0|0	0|0|0	0|0|0	0|0|0
102	0|0|0	0|0|0	0|0|0	0|0|0	0|0|0	0|0|0	0|0|0	0|0|0	0|0|0	0|0|0	0|0|0	0|0|0	0|0|0	0|0|0	0|0|0	0|0|0	0|0|0	0|0|0	0|0|0	0|0|0	0|0|0	0|0|0	0|0|0	0|0|0	0|0|0	0|0|0	0|0|0	0|0|0	0|0|0	0|0|0	0|0|0	0|0|0	0|0|0	0|0|0	0|0|0	0|0|0	0|0|0	0|0|0	0|0|0	0|0|0	0|0|0	0|0|0	0|0|0	0|0|0	0|0|0	0|0|0	0|0|0	0|0|0	0|0|0
103	0|0|0	0|0|0	0|0|0	0|0|0	0|0|0	0|0|0	0|0|0	0|0|0	0|0|0	0|0|0	0|0|0	0|0|0	0|0|0	0|0|0	0|0|0	0|0|0	0|0|0	0|0|0	0|0|0	0|0|0	0|0|0	0|0|0	0|0|0	0|0|0	0|0|0	0|0|0	0|0|0	0|0|0	0|0|0	0|0|0	0|0|0	0|0|0	0|0|0	0|0|0	0|0|0	0|0|0	0|0|0	0|0|0	0|0|0	0|0|0	0|0|0	0|0|0	0|0|0	0|0|0	0|0|0	0|0|0	0|0|0	0|0|0	0|0|0
104	0|0|0	0|0|0	0|0|0	0|0|0	0|0|0	0|0|0	0|0|0	0|0|0	0|0|0	0|0|0	0|0|0	0|0|0	0|0|0	0|0|0	0|0|0	0|0|0	0|0|0	0|0|0	0|0|0	0|0|0	0|0|0	0|0|0	0|0|0	0|0|0	0|0|0	0|0|0	0|0|0	0|0|0	0|0|0	0|0|0	0|0|0	0|0|0	0|0|0	0|0|0	0|0|0	0|0|0	0|0|0	0|0|0	0|0|0	0|0|0	0|0|0	0|0|0	0|0|0	0|0|0	0|0|0	0|0|0	0|0|0	0|0|0	0|0|0
105	0|0|0	0|0|0	0|0|0	0|0|0	0|0|0	0|0|0	0|0|0	0|0|0	0|0|0	0|0|0	0|0|0	0|0|0	0|0|0	0|0|0	0|0|0	0|0|0	0|0|0	0|0|0	0|0|0	0|0|0	0|0|0	0|0|0	0|0|0	0|0|0	0|0|0	0|0|0	0|0|0	0|0|0	0|0|0	0|0|0	0|0|0	0|0|0	0|0|0	0|0|0	0|0|0	0|0|0	0|0|0	0|0|0	0|0|0	0|0|0	0|0|0	0|0|0	0|0|0	0|0|0	0|0|0	0|0|0	0|0|0	0|0|0	0|0|0
106	0|0|0	0|0|0	0|0|0	0|0|0	0|0|0	0|0|0	0|0|0	0|0|0	0|0|0	0|0|0	0|0|0	0|0|0	0|0|0	0|0|0	0|0|0	0|0|0	0|0|0	0|0|0	0|0|0	0|0|0	0|0|0	0|0|0	0|0|0	0|0|0	0|0|0	0|0|0	0|0|0	0|0|0	0|0|0	0|0|0	0|0|0	0|0|0	0|0|0	0|0|0	0|0|0	0|0|0	0|0|0	0|0|0	0|0|0	0|0|0	0|0|0	0|0|0	0|0|0	0|0|0	0|0|0	0|0|0	0|0|0	0|0|0	0|0|0
107	0|0|0	0|0|0	0|0|0	0|0|0	0|0|0	0|0|0	0|0|0	0|0|0	0|0|0	0|0|0	0|0|0	0|0|0	0|0|0	0|0|0	0|0|0	0|0|0	0|0|0	0|0|0	0|0|0	0|0|0	0|0|0	0|0|0	0|0|0	0|0|0	0|0|0	0|0|0	0|0|0	0|0|0	0|0|0	0|0|0	0|0|0	0|0|0	0|0|0	0|0|0	0|0|0	0|0|0	0|0|0	0|0|0	0|0|0	0|0|0	0|0|0	0|0|0	0|0|0	0|0|0	0|0|0	0|0|0	0|0|0	0|0|0	0|0|0
108	0|0|0	0|0|0	0|0|0	0|0|0	0|0|0	0|0|0	0|0|0	0|0|0	0|0|0	0|0|0	0|0|0	0|0|0	0|0|0	0|0|0	0|0|0	0|0|0	0|0|0	0|0|0	0|0|0	0|0|0	0|0|0	0|0|0	0|0|0	0|0|0	0|0|0	0|0|0	0|0|0	0|0|0	0|0|0	0|0|0	0|0|0	0|0|0	0|0|0	0|0|0	0|0|0	0|0|0	0|0|0	0|0|0	0|0|0	0|0|0	0|0|0	0|0|0	0|0|0	0|0|0	0|0|0	0|0|0	0|0|0	0|0|0	0|0|0
109	0|0|0	0|0|0	0|0|0	0|0|0	0|0|0	0|0|0	0|0|0	0|0|0	0|0|0	0|0|0	0|0|0	0|0|0	0|0|0	0|0|0	0|0|0	0|0|0	0|0|0	0|0|0	0|0|0	0|0|0	0|0|0	0|0|0	0|0|0	0|0|0	0|0|0	0|0|0	0|0|0	0|0|0	0|0|0	0|0|0	0|0|0	0|0|0	0|0|0	0|0|0	0|0|0	0|0|0	0|0|0	0|0|0	0|0|0	0|0|0	0|0|0	0|0|0	0|0|0	0|0|0	0|0|0	0|0|0	0|0|0	0|0|0	0|0|0
110	0|0|0	0|0|0	0|0|0	0|0|0	0|0|0	0|0|0	0|0|0	0|0|0	0|0|0	0|0|0	0|0|0	0|0|0	0|0|0	0|0|0	0|0|0	0|0|0	0|0|0	0|0|0	0|0|0	0|0|0	0|0|0	0|0|0	0|0|0	0|0|0	0|0|0	0|0|0	0|0|0	0|0|0	0|0|0	0|0|0	0|0|0	0|0|0	0|0|0	0|0|0	0|0|0	0|0|0	0|0|0	0|0|0	0|0|0	0|0|0	0|0|0	0|0|0	0|0|0	0|0|0	0|0|0	0|0|0	0|0|0	0|0|0	0|0|0
111	0|0|0	0|0|0	0|0|0	0|0|0	0|0|0	0|0|0	0|0|0	0|0|0	0|0|0	0|0|0	0|0|0	0|0|0	0|0|0	0|0|0	0|0|0	0|0|0	0|0|0	0|0|0	0|0|0	0|0|0	0|0|0	0|0|0	0|0|0	0|0|0	0|0|0	0|0|0	0|0|0	0|0|0	0|0|0	0|0|0	0|0|0	0|0|0	0|0|0	0|0|0	0|0|0	0|0|0	0|0|0	0|0|0	0|0|0	0|0|0	0|0|0	0|0|0	0|0|0	0|0|0	0|0|0	0|0|0	0|0|0	0|0|0	0|0|0
112	0|0|0	0|0|0	0|0|0	0|0|0	0|0|0	0|0|0	0|0|0	0|0|0	0|0|0	0|0|0	0|0|0	0|0|0	0|0|0	0|0|0	0|0|0	0|0|0	0|0|0	0|0|0	0|0|0	0|0|0	0|0|0	0|0|0	0|0|0	0|0|0	0|0|0	0|0|0	0|0|0	0|0|0	0|0|0	0|0|0	0|0|0	0|0|0	0|0|0	0|0|0	0|0|0	0|0|0	0|0|0	0|0|0	0|0|0	0|0|0	0|0|0	0|0|0	0|0|0	0|0|0	0|0|0	0|0|0	0|0|0	0|0|0	0|0|0
113	0|0|0	0|0|0	0|0|0	0|0|0	0|0|0	0|0|0	0|0|0	0|0|0	0|0|0	0|0|0	0|0|0	0|0|0	0|0|0	0|0|0	0|0|0	0|0|0	0|0|0	0|0|0	0|0|0	0|0|0	0|0|0	0|0|0	0|0|0	0|0|0	0|0|0	0|0|0	0|0|0	0|0|0	0|0|0	0|0|0	0|0|0	0|0|0	0|0|0	0|0|0	0|0|0	0|0|0	0|0|0	0|0|0	0|0|0	0|0|0	0|0|0	0|0|0	0|0|0	0|0|0	0|0|0	0|0|0	0|0|0	0|0|0	0|0|0
114	0|0|0	0|0|0	0|0|0	0|0|0	0|0|0	0|0|0	0|0|0	0|0|0	0|0|0	0|0|0	0|0|0	0|0|0	0|0|0	0|0|0	0|0|0	0|0|0	0|0|0	0|0|0	0|0|0	0|0|0	0|0|0	0|0|0	0|0|0	0|0|0	0|0|0	0|0|0	0|0|0	0|0|0	0|0|0	0|0|0	0|0|0	0|0|0	0|0|0	0|0|0	0|0|0	0|0|0	0|0|0	0|0|0	0|0|0	0|0|0	0|0|0	0|0|0	0|0|0	0|0|0	0|0|0	0|0|0	0|0|0	0|0|0	0|0|0
115	0|0|0	0|0|0	0|0|0	0|0|0	0|0|0	0|0|0	0|0|0	0|0|0	0|0|0	0|0|0	0|0|0	0|0|0	0|0|0	0|0|0	0|0|0	0|0|0	0|0|0	0|0|0	0|0|0	0|0|0	0|0|0	0|0|0	0|0|0	0|0|0	0|0|0	0|0|0	0|0|0	0|0|0	0|0|0	0|0|0	0|0|0	0|0|0	0|0|0	0|0|0	0|0|0	0|0|0	0|0|0	0|0|0	0|0|0	0|0|0	0|0|0	0|0|0	0|0|0	0|0|0	0|0|0	0|0|0	0|0|0	0|0|0	0|0|0
116	0|0|0	0|0|0	0|0|0	0|0|0	0|0|0	0|0|0	0|0|0	0|0|0	0|0|0	0|0|0	0|0|0	0|0|0	0|0|0	0|0|0	0|0|0	0|0|0	0|0|0	0|0|0	0|0|0	0|0|0	0|0|0	0|0|0	0|0|0	0|0|0	0|0|0	0|0|0	0|0|0	0|0|0	0|0|0	0|0|0	0|0|0	0|0|0	0|0|0	0|0|0	0|0|0	0|0|0	0|0|0	0|0|0	0|0|0	0|0|0	0|0|0	0|0|0	0|0|0	0|0|0	0|0|0	0|0|0	0|0|0	0|0|0	0|0|0
117	0|0|0	0|0|0	0|0|0	0|0|0	0|0|0	0|0|0	0|0|0	0|0|0	0|0|0	0|0|0	0|0|0	0|0|0	0|0|0	0|0|0	0|0|0	0|0|0	0|0|0	0|0|0	0|0|0	0|0|0	0|0|0	0|0|0	0|0|0	0|0|0	0|0|0	0|0|0	0|0|0	0|0|0	0|0|0	0|0|0	0|0|0	0|0|0	0|0|0	0|0|0	0|0|0	0|0|0	0|0|0	0|0|0	0|0|0	0|0|0	0|0|0	0|0|0	0|0|0	0|0|0	0|0|0	0|0|0	0|0|0	0|0|0	0|0|0
118	0|0|0	0|0|0	0|0|0	0|0|0	0|0|0	0|0|0	0|0|0	0|0|0	0|0|0	0|0|0	0|0|0	0|0|0	0|0|0	0|0|0	0|0|0	0|0|0	0|0|0	0|0|0	0|0|0	0|0|0	0|0|0	0|0|0	0|0|0	0|0|0	0|0|0	0|0|0	0|0|0	0|0|0	0|0|0	0|0|0	0|0|0	0|0|0	0|0|0	0|0|0	0|0|0	0|0|0	0|0|0	0|0|0	0|0|0	0|0|0	0|0|0	0|0|0	0|0|0	0|0|0	0|0|0	0|0|0	0|0|0	0|0|0	0|0|0
119	0|0|0	0|0|0	0|0|0	0|0|0	0|0|0	0|0|0	0|0|0	0|0|0	0|0|0	0|0|0	0|0|0	0|0|0	0|0|0	0|0|0	0|0|0	0|0|0	0|0|0	0|0|0	0|0|0	0|0|0	0|0|0	0|0|0	0|0|0	0|0|0	0|0|0	0|0|0	0|0|0	0|0|0	0|0|0	0|0|0	0|0|0	0|0|0	0|0|0	0|0|0	0|0|0	0|0|0	0|0|0	0|0|0	0|0|0	0|0|0	0|0|0	0|0|0	0|0|0	0|0|0	0|0|0	0|0|0	0|0|0	0|0|0	0|0|0
120	0|0|0	0|0|0	0|0|0	0|0|0	0|0|0	0|0|0	0|0|0	0|0|0	0|0|0	0|0|0	0|0|0	0|0|0	0|0|0	0|0|0	0|0|0	0|0|0	0|0|0	0|0|0	0|0|0	0|0|0	0|0|0	0|0|0	0|0|0	0|0|0	0|0|0	0|0|0	0|0|0	0|0|0	0|0|0	0|0|0	0|0|0	0|0|0	0|0|0	0|0|0	0|0|0	0|0|0	0|0|0	0|0|0	0|0|0	0|0|0	0|0|0	0|0|0	0|0|0	0|0|0	0|0|0	0|0|0	0|0|0	0|0|0	0|0|0
Onset report:
Onset	HEP	MMR	DTAP	HBPV	IPV	PNC	VARCEL	HBHEPB	DTP	HEPA	HIBV	MEN	RUB	FLU3	MNQ	FLUN3	TDAP	HPV4	MMRV	FLUX	TD	FLU(H1N1)	FLUN(H1N1)	DTAPIPVHIB	VARZOS	PNC13	DTAPIPV	RAB	PPV	TYP	FLUN4	HPV9	FLU4	HPVX	RV1	FLUA3	MENB	UNK	FLUC4	COVID19	COVID19-2	PNC20	OPV	DTAPH	HEPAB	YF	DTIPV	HPV2	JEVX
-1	15	7	1			2	3	1		9	3	1	1	2	3	1	4	10	1	19	1		1	1		6	1	3	5	1	1	2	1	5	1		4	3		66			1		2	1		7	1
0	4	9	8		12	5	2			3	10			2	1	2	1	6	2	1		1	3	2	1	6	5	1	6		2	3	2		2	1	4	4		24				1			1	2
1	5	11	9		7	6	4			6	5			13	2	2	2	4	2	3	1	1		4		11	2	2	5		1	4	6	1	1		2	4		24	1		1		2	1		1
2	4	6	8		7	6	2			1	3			6		4		2	3	1		1	1	3		4	2		2		3	1	3				5	2		19	1	1			2
3	3	6	4	1	5	2	1		1	1	2			2	2		1	1		1	1			1	1	2	1		2		1	3	3			2	2	1		10					2	1
4	3	4	2		3	3	2	2		2	1			2	1		1	1				1			1	1					1	2	1				1		1	13
5	2	1				1	1							1	1	1	1	3	1	2		2					1				1	1					2			7	1							1
6		2	2		1	1			2		2			1		1		2	1							1					1		1							8
7		2	1		1					1				1	3		1	1										1	1	1		4					2			7
8	1	2								1					1		1	1								1		1				1	1							4
9	2	4	2		2		4			5	1					2					1			1		3		1				1	1							9									1
10	1	1			1							1		1				1			1					1						2								3
11		1					1			1		1				2						1				1											1			4
12	3	1					2											1													1								1	3
13	2		1																1								1													3
14	1	1	1				1							1				1	1				1																	4
15					1									1				2		1			1									2								3
16	2									1		1						2			1							1												5									1
17										2					1			3	1	2		1							1								1			2
18		1	1				2										2								1							2	2				2			1	1
19																	1	1		1										1										1
20														1				1																						3
21							1							1	1	1	1	2																						1
22										1								1																						1
23																			1	1							1
24										1																1														2					1
25																				1																				1
26														1	1																									1
27		2	1		1						1												1						1
28		1					1							1								1	1				1					1								1
29														1			1														1
30		1					1										2																1							1					1
31	1																	1																						2					1
32			1							1
33	1						1																																	1
34																																								1
35																																								1
36														1
37
38																		1							1												1
39																																								1
40																			1																					1
41														1				1	1								1											1		1
42																																								1
43	1																																							1
44																																																1
45		1
46											1															1
47																																								1
48																		1
49																1																						1		2
50			1															1	1			1					2																		1
51																		1			1
52																				1
53																																																1
54
55
56
57																		1																						1
58
59
60		1					1			1												1
61																																2								1
62
63
64
65
66
67																																1
68
69		1
70																			1						1		1													1
71
72
73
74																																								1
75																																								1
76										1							1
77																																1
78
79																																								1
80
81
82							1
83
84
85
86																																								1
87																																								1
88
89																																																1
90
91
92										1
93
94
95
96
97
98
99																		1
100
101
102
103
104																																								1
105																																								1
106
107
108
109																																								1
110
111
112
113
114
115
116
117
118
119																																								1
120
Shots report:
Shots	HEP	MMR	DTAP	HBPV	IPV	PNC	VARCEL	HBHEPB	DTP	HEPA	HIBV	MEN	RUB	FLU3	MNQ	FLUN3	TDAP	HPV4	MMRV	FLUX	TD	FLU(H1N1)	FLUN(H1N1)	DTAPIPVHIB	VARZOS	PNC13	DTAPIPV	RAB	PPV	TYP	FLUN4	HPV9	FLU4	HPVX	RV1	FLUA3	MENB	UNK	FLUC4	COVID19	COVID19-2	PNC20	OPV	DTAPH	HEPAB	YF	DTIPV	HPV2	JEVX
1	31	31	8		16	10	11	1		14	6	3	1	35	5	15	5	45	2	26	2	9	8	1	4	14		5	16	1	12	29	17	6		3	21	9	2	251	3	1			10	1		15
2	14	15	10		4	2	7		2	10	5	1		3	6	1	10	8	11	7	2	2	1	5	2	8	12	1	5			6	1				2	6		8	2		1				1		1
3	6	13	11		8	7	7		1	7	8			2	2		2	2	4	1	2			6		7	6	2	1	2	1		2		2			1		2			1	1	2	1
4	2	8	10	1	10	7	8	2		6	6				3		2	1			1					8	1	2	1			1	1		2		4								1	1			2
5	1	1	3		2	1				3	3			1	1	1	1	1	1							2							1
6		1	1		1						1																											1
7
8
9
10
11
12
13
14
15
16
17
18
19
20
21
22
23
24
25
Shots frequency report: count|total|frequency/100K
Shots	HEP	MMR	DTAP	HBPV	IPV	PNC	VARCEL	HBHEPB	DTP	HEPA	HIBV	MEN	RUB	FLU3	MNQ	FLUN3	TDAP	HPV4	MMRV	FLUX	TD	FLU(H1N1)	FLUN(H1N1)	DTAPIPVHIB	VARZOS	PNC13	DTAPIPV	RAB	PPV	TYP	FLUN4	HPV9	FLU4	HPVX	RV1	FLUA3	MENB	UNK	FLUC4	COVID19	COVID19-2	PNC20	OPV	DTAPH	HEPAB	YF	DTIPV	HPV2	JEVX
1	31|44058|70	31|27856|111	8|10968|72	|0|0	16|2382|671	10|4209|237	11|41464|26	1|337|296	|0|0	14|13671|102	6|7037|85	3|1667|179	1|825|121	35|71593|48	5|9486|52	15|5257|285	5|21511|23	45|36911|121	2|10302|19	26|24450|106	2|11913|16	9|7718|116	8|2590|308	1|2618|38	4|106707|3	14|14421|97	|0|0	5|4784|104	16|43087|37	1|4101|24	12|3923|305	29|14436|200	17|32190|52	6|2086|287	|0|0	3|2467|121	21|8985|233	9|17959|50	2|5456|36	251|1496895|16	3|34155|8	1|1336|74	|0|0	|0|0	10|3817|261	1|1678|59	|0|0	15|4632|323	|0|0
2	14|8402|166	15|17184|87	10|11631|85	|0|0	4|5543|72	2|4346|46	7|14775|47	|0|0	2|5822|34	10|9489|105	5|8868|56	1|1619|61	|0|0	3|18627|16	6|8415|71	1|477|209	10|11464|87	8|4999|160	11|5510|199	7|7595|92	2|4170|47	2|977|204	1|194|515	5|2449|204	2|9513|21	8|8816|90	12|4326|277	1|715|139	5|22442|22	|0|0	|0|0	6|2694|222	1|9941|10	|0|0	|0|0	|0|0	2|2608|76	6|9343|64	|0|0	8|59519|13	2|4062|49	|0|0	1|6015|16	|0|0	|0|0	|0|0	1|241|414	|0|0	1|55|1818
3	6|8166|73	13|23866|54	11|20667|53	|0|0	8|16897|47	7|7358|95	7|12607|55	|0|0	1|10657|9	7|8625|81	8|19950|40	|0|0	|0|0	2|3557|56	2|6676|29	|0|0	2|7700|25	2|3067|65	4|2974|134	1|1080|92	2|1722|116	|0|0	|0|0	6|3911|153	|0|0	7|7967|87	6|3180|188	2|242|826	1|3435|29	2|2058|97	1|151|662	|0|0	2|2184|91	|0|0	2|2129|93	|0|0	|0|0	1|1736|57	|0|0	2|8740|22	|0|0	|0|0	1|12931|7	1|266|375	2|693|288	1|854|117	|0|0	|0|0	|0|0
4	2|9379|21	8|15024|53	10|15131|66	1|81|1234	10|13726|72	7|9431|74	8|11003|72	2|2291|87	|0|0	6|7738|77	6|18134|33	|0|0	|0|0	|0|0	3|2958|101	|0|0	2|3399|58	1|1528|65	|0|0	|0|0	1|733|136	|0|0	|0|0	|0|0	|0|0	8|7864|101	1|1227|81	2|123|1626	1|1248|80	|0|0	|0|0	1|838|119	1|1384|72	|0|0	2|2508|79	|0|0	4|821|487	|0|0	|0|0	|0|0	|0|0	|0|0	|0|0	|0|0	1|364|274	1|550|181	|0|0	|0|0	2|20|10000
5	1|2960|33	1|3952|25	3|4402|68	|0|0	2|4360|45	1|2557|39	|0|0	|0|0	|0|0	3|2841|105	3|4499|66	|0|0	|0|0	1|954|104	1|860|116	1|144|694	1|1022|97	1|445|224	1|440|227	|0|0	|0|0	|0|0	|0|0	|0|0	|0|0	2|1915|104	|0|0	|0|0	|0|0	|0|0	|0|0	|0|0	1|501|199	|0|0	|0|0	|0|0	|0|0	|0|0	|0|0	|0|0	|0|0	|0|0	|0|0	|0|0	|0|0	|0|0	|0|0	|0|0	|0|0
6	|0|0	1|1131|88	1|986|101	|0|0	1|1097|91	|0|0	|0|0	|0|0	|0|0	|0|0	1|1198|83	|0|0	|0|0	|0|0	|0|0	|0|0	|0|0	|0|0	|0|0	|0|0	|0|0	|0|0	|0|0	|0|0	|0|0	|0|0	|0|0	|0|0	|0|0	|0|0	|0|0	|0|0	|0|0	|0|0	|0|0	|0|0	|0|0	1|132|757	|0|0	|0|0	|0|0	|0|0	|0|0	|0|0	|0|0	|0|0	|0|0	|0|0	|0|0
7	|0|0	|0|0	|0|0	|0|0	|0|0	|0|0	|0|0	|0|0	|0|0	|0|0	|0|0	|0|0	|0|0	|0|0	|0|0	|0|0	|0|0	|0|0	|0|0	|0|0	|0|0	|0|0	|0|0	|0|0	|0|0	|0|0	|0|0	|0|0	|0|0	|0|0	|0|0	|0|0	|0|0	|0|0	|0|0	|0|0	|0|0	|0|0	|0|0	|0|0	|0|0	|0|0	|0|0	|0|0	|0|0	|0|0	|0|0	|0|0	|0|0
8	|0|0	|0|0	|0|0	|0|0	|0|0	|0|0	|0|0	|0|0	|0|0	|0|0	|0|0	|0|0	|0|0	|0|0	|0|0	|0|0	|0|0	|0|0	|0|0	|0|0	|0|0	|0|0	|0|0	|0|0	|0|0	|0|0	|0|0	|0|0	|0|0	|0|0	|0|0	|0|0	|0|0	|0|0	|0|0	|0|0	|0|0	|0|0	|0|0	|0|0	|0|0	|0|0	|0|0	|0|0	|0|0	|0|0	|0|0	|0|0	|0|0
9	|0|0	|0|0	|0|0	|0|0	|0|0	|0|0	|0|0	|0|0	|0|0	|0|0	|0|0	|0|0	|0|0	|0|0	|0|0	|0|0	|0|0	|0|0	|0|0	|0|0	|0|0	|0|0	|0|0	|0|0	|0|0	|0|0	|0|0	|0|0	|0|0	|0|0	|0|0	|0|0	|0|0	|0|0	|0|0	|0|0	|0|0	|0|0	|0|0	|0|0	|0|0	|0|0	|0|0	|0|0	|0|0	|0|0	|0|0	|0|0	|0|0
10	|0|0	|0|0	|0|0	|0|0	|0|0	|0|0	|0|0	|0|0	|0|0	|0|0	|0|0	|0|0	|0|0	|0|0	|0|0	|0|0	|0|0	|0|0	|0|0	|0|0	|0|0	|0|0	|0|0	|0|0	|0|0	|0|0	|0|0	|0|0	|0|0	|0|0	|0|0	|0|0	|0|0	|0|0	|0|0	|0|0	|0|0	|0|0	|0|0	|0|0	|0|0	|0|0	|0|0	|0|0	|0|0	|0|0	|0|0	|0|0	|0|0
11	|0|0	|0|0	|0|0	|0|0	|0|0	|0|0	|0|0	|0|0	|0|0	|0|0	|0|0	|0|0	|0|0	|0|0	|0|0	|0|0	|0|0	|0|0	|0|0	|0|0	|0|0	|0|0	|0|0	|0|0	|0|0	|0|0	|0|0	|0|0	|0|0	|0|0	|0|0	|0|0	|0|0	|0|0	|0|0	|0|0	|0|0	|0|0	|0|0	|0|0	|0|0	|0|0	|0|0	|0|0	|0|0	|0|0	|0|0	|0|0	|0|0
12	|0|0	|0|0	|0|0	|0|0	|0|0	|0|0	|0|0	|0|0	|0|0	|0|0	|0|0	|0|0	|0|0	|0|0	|0|0	|0|0	|0|0	|0|0	|0|0	|0|0	|0|0	|0|0	|0|0	|0|0	|0|0	|0|0	|0|0	|0|0	|0|0	|0|0	|0|0	|0|0	|0|0	|0|0	|0|0	|0|0	|0|0	|0|0	|0|0	|0|0	|0|0	|0|0	|0|0	|0|0	|0|0	|0|0	|0|0	|0|0	|0|0
13	|0|0	|0|0	|0|0	|0|0	|0|0	|0|0	|0|0	|0|0	|0|0	|0|0	|0|0	|0|0	|0|0	|0|0	|0|0	|0|0	|0|0	|0|0	|0|0	|0|0	|0|0	|0|0	|0|0	|0|0	|0|0	|0|0	|0|0	|0|0	|0|0	|0|0	|0|0	|0|0	|0|0	|0|0	|0|0	|0|0	|0|0	|0|0	|0|0	|0|0	|0|0	|0|0	|0|0	|0|0	|0|0	|0|0	|0|0	|0|0	|0|0
14	|0|0	|0|0	|0|0	|0|0	|0|0	|0|0	|0|0	|0|0	|0|0	|0|0	|0|0	|0|0	|0|0	|0|0	|0|0	|0|0	|0|0	|0|0	|0|0	|0|0	|0|0	|0|0	|0|0	|0|0	|0|0	|0|0	|0|0	|0|0	|0|0	|0|0	|0|0	|0|0	|0|0	|0|0	|0|0	|0|0	|0|0	|0|0	|0|0	|0|0	|0|0	|0|0	|0|0	|0|0	|0|0	|0|0	|0|0	|0|0	|0|0
15	|0|0	|0|0	|0|0	|0|0	|0|0	|0|0	|0|0	|0|0	|0|0	|0|0	|0|0	|0|0	|0|0	|0|0	|0|0	|0|0	|0|0	|0|0	|0|0	|0|0	|0|0	|0|0	|0|0	|0|0	|0|0	|0|0	|0|0	|0|0	|0|0	|0|0	|0|0	|0|0	|0|0	|0|0	|0|0	|0|0	|0|0	|0|0	|0|0	|0|0	|0|0	|0|0	|0|0	|0|0	|0|0	|0|0	|0|0	|0|0	|0|0
16	|0|0	|0|0	|0|0	|0|0	|0|0	|0|0	|0|0	|0|0	|0|0	|0|0	|0|0	|0|0	|0|0	|0|0	|0|0	|0|0	|0|0	|0|0	|0|0	|0|0	|0|0	|0|0	|0|0	|0|0	|0|0	|0|0	|0|0	|0|0	|0|0	|0|0	|0|0	|0|0	|0|0	|0|0	|0|0	|0|0	|0|0	|0|0	|0|0	|0|0	|0|0	|0|0	|0|0	|0|0	|0|0	|0|0	|0|0	|0|0	|0|0
17	|0|0	|0|0	|0|0	|0|0	|0|0	|0|0	|0|0	|0|0	|0|0	|0|0	|0|0	|0|0	|0|0	|0|0	|0|0	|0|0	|0|0	|0|0	|0|0	|0|0	|0|0	|0|0	|0|0	|0|0	|0|0	|0|0	|0|0	|0|0	|0|0	|0|0	|0|0	|0|0	|0|0	|0|0	|0|0	|0|0	|0|0	|0|0	|0|0	|0|0	|0|0	|0|0	|0|0	|0|0	|0|0	|0|0	|0|0	|0|0	|0|0
18	|0|0	|0|0	|0|0	|0|0	|0|0	|0|0	|0|0	|0|0	|0|0	|0|0	|0|0	|0|0	|0|0	|0|0	|0|0	|0|0	|0|0	|0|0	|0|0	|0|0	|0|0	|0|0	|0|0	|0|0	|0|0	|0|0	|0|0	|0|0	|0|0	|0|0	|0|0	|0|0	|0|0	|0|0	|0|0	|0|0	|0|0	|0|0	|0|0	|0|0	|0|0	|0|0	|0|0	|0|0	|0|0	|0|0	|0|0	|0|0	|0|0
19	|0|0	|0|0	|0|0	|0|0	|0|0	|0|0	|0|0	|0|0	|0|0	|0|0	|0|0	|0|0	|0|0	|0|0	|0|0	|0|0	|0|0	|0|0	|0|0	|0|0	|0|0	|0|0	|0|0	|0|0	|0|0	|0|0	|0|0	|0|0	|0|0	|0|0	|0|0	|0|0	|0|0	|0|0	|0|0	|0|0	|0|0	|0|0	|0|0	|0|0	|0|0	|0|0	|0|0	|0|0	|0|0	|0|0	|0|0	|0|0	|0|0
20	|0|0	|0|0	|0|0	|0|0	|0|0	|0|0	|0|0	|0|0	|0|0	|0|0	|0|0	|0|0	|0|0	|0|0	|0|0	|0|0	|0|0	|0|0	|0|0	|0|0	|0|0	|0|0	|0|0	|0|0	|0|0	|0|0	|0|0	|0|0	|0|0	|0|0	|0|0	|0|0	|0|0	|0|0	|0|0	|0|0	|0|0	|0|0	|0|0	|0|0	|0|0	|0|0	|0|0	|0|0	|0|0	|0|0	|0|0	|0|0	|0|0
21	|0|0	|0|0	|0|0	|0|0	|0|0	|0|0	|0|0	|0|0	|0|0	|0|0	|0|0	|0|0	|0|0	|0|0	|0|0	|0|0	|0|0	|0|0	|0|0	|0|0	|0|0	|0|0	|0|0	|0|0	|0|0	|0|0	|0|0	|0|0	|0|0	|0|0	|0|0	|0|0	|0|0	|0|0	|0|0	|0|0	|0|0	|0|0	|0|0	|0|0	|0|0	|0|0	|0|0	|0|0	|0|0	|0|0	|0|0	|0|0	|0|0
22	|0|0	|0|0	|0|0	|0|0	|0|0	|0|0	|0|0	|0|0	|0|0	|0|0	|0|0	|0|0	|0|0	|0|0	|0|0	|0|0	|0|0	|0|0	|0|0	|0|0	|0|0	|0|0	|0|0	|0|0	|0|0	|0|0	|0|0	|0|0	|0|0	|0|0	|0|0	|0|0	|0|0	|0|0	|0|0	|0|0	|0|0	|0|0	|0|0	|0|0	|0|0	|0|0	|0|0	|0|0	|0|0	|0|0	|0|0	|0|0	|0|0
23	|0|0	|0|0	|0|0	|0|0	|0|0	|0|0	|0|0	|0|0	|0|0	|0|0	|0|0	|0|0	|0|0	|0|0	|0|0	|0|0	|0|0	|0|0	|0|0	|0|0	|0|0	|0|0	|0|0	|0|0	|0|0	|0|0	|0|0	|0|0	|0|0	|0|0	|0|0	|0|0	|0|0	|0|0	|0|0	|0|0	|0|0	|0|0	|0|0	|0|0	|0|0	|0|0	|0|0	|0|0	|0|0	|0|0	|0|0	|0|0	|0|0
24	|0|0	|0|0	|0|0	|0|0	|0|0	|0|0	|0|0	|0|0	|0|0	|0|0	|0|0	|0|0	|0|0	|0|0	|0|0	|0|0	|0|0	|0|0	|0|0	|0|0	|0|0	|0|0	|0|0	|0|0	|0|0	|0|0	|0|0	|0|0	|0|0	|0|0	|0|0	|0|0	|0|0	|0|0	|0|0	|0|0	|0|0	|0|0	|0|0	|0|0	|0|0	|0|0	|0|0	|0|0	|0|0	|0|0	|0|0	|0|0	|0|0
25	|0|0	|0|0	|0|0	|0|0	|0|0	|0|0	|0|0	|0|0	|0|0	|0|0	|0|0	|0|0	|0|0	|0|0	|0|0	|0|0	|0|0	|0|0	|0|0	|0|0	|0|0	|0|0	|0|0	|0|0	|0|0	|0|0	|0|0	|0|0	|0|0	|0|0	|0|0	|0|0	|0|0	|0|0	|0|0	|0|0	|0|0	|0|0	|0|0	|0|0	|0|0	|0|0	|0|0	|0|0	|0|0	|0|0	|0|0	|0|0	|0|0
Children age 0-5 shots frequency report: count|total|frequency/100K
Shots	HEP	MMR	DTAP	HBPV	IPV	PNC	VARCEL	HBHEPB	DTP	HEPA	HIBV	MEN	RUB	FLU3	MNQ	FLUN3	TDAP	HPV4	MMRV	FLUX	TD	FLU(H1N1)	FLUN(H1N1)	DTAPIPVHIB	VARZOS	PNC13	DTAPIPV	RAB	PPV	TYP	FLUN4	HPV9	FLU4	HPVX	RV1	FLUA3	MENB	UNK	FLUC4	COVID19	COVID19-2	PNC20	OPV	DTAPH	HEPAB	YF	DTIPV	HPV2	JEVX
1	8|3491|229	17|9746|174	6|6962|86	|0|0	13|1292|1006	9|3230|278	8|13540|59	1|185|540	|0|0	7|3094|226	5|3722|134	0|270|0	0|43|0	18|4073|441	0|238|0	7|1451|482	0|572|0	0|141|0	2|3446|58	5|1137|439	0|73|0	0|1150|0	6|556|1079	0|1992|0	1|237|421	5|2865|174	|0|0	0|155|0	8|1682|475	0|101|0	2|1048|190	0|254|0	10|2706|369	0|10|0	|0|0	0|14|0	9|1960|459	5|1413|353	0|178|0	13|6902|188	1|1465|68	0|32|0	|0|0	|0|0	4|73|5479	0|50|0	|0|0	0|5|0	|0|0
2	4|2081|192	12|11193|107	6|9827|61	|0|0	4|4277|93	1|3806|26	3|8110|36	|0|0	1|5204|19	5|3105|161	4|7871|50	0|477|0	|0|0	1|1084|92	0|211|0	1|104|961	0|229|0	0|21|0	10|4253|235	1|370|270	0|52|0	2|185|1081	0|64|0	4|2109|189	0|52|0	6|4356|137	9|3717|242	0|40|0	1|757|132	|0|0	|0|0	0|23|0	0|605|0	|0|0	|0|0	|0|0	0|270|0	0|551|0	|0|0	0|273|0	0|114|0	|0|0	0|5553|0	|0|0	|0|0	|0|0	0|20|0	|0|0	0|27|0
3	3|4960|60	11|20641|53	10|18981|52	|0|0	7|14698|47	6|6942|86	7|8860|79	|0|0	1|9838|10	4|4409|90	6|18543|32	|0|0	|0|0	2|1329|150	0|121|0	|0|0	0|151|0	0|20|0	4|2605|153	0|269|0	0|54|0	|0|0	|0|0	6|3610|166	|0|0	7|6610|105	5|2848|175	0|13|0	1|711|140	0|35|0	1|59|1694	|0|0	2|782|255	|0|0	2|1593|125	|0|0	|0|0	0|359|0	|0|0	0|60|0	|0|0	|0|0	0|12136|0	1|250|400	0|18|0	0|17|0	|0|0	|0|0	|0|0
4	0|7275|0	6|13145|45	9|14180|63	1|74|1351	9|11986|75	7|9138|76	7|8602|81	2|2197|91	|0|0	4|4791|83	5|17251|28	|0|0	|0|0	|0|0	0|92|0	|0|0	0|150|0	0|17|0	|0|0	|0|0	0|42|0	|0|0	|0|0	|0|0	|0|0	6|7250|82	1|1100|90	0|14|0	0|706|0	|0|0	|0|0	0|21|0	0|726|0	|0|0	1|2217|45	|0|0	2|315|634	|0|0	|0|0	|0|0	|0|0	|0|0	|0|0	|0|0	0|15|0	0|6|0	|0|0	|0|0	0|0|0
5	1|2125|47	1|3304|30	3|4137|72	|0|0	2|3562|56	1|2484|40	|0|0	|0|0	|0|0	2|1794|111	3|4190|71	|0|0	|0|0	0|701|0	0|43|0	1|72|1388	0|41|0	0|9|0	1|342|292	|0|0	|0|0	|0|0	|0|0	|0|0	|0|0	2|1750|114	|0|0	|0|0	|0|0	|0|0	|0|0	|0|0	1|318|314	|0|0	|0|0	|0|0	|0|0	|0|0	|0|0	|0|0	|0|0	|0|0	|0|0	|0|0	|0|0	|0|0	|0|0	|0|0	|0|0
6	|0|0	0|838|0	0|906|0	|0|0	0|715|0	|0|0	|0|0	|0|0	|0|0	|0|0	0|1115|0	|0|0	|0|0	|0|0	|0|0	|0|0	|0|0	|0|0	|0|0	|0|0	|0|0	|0|0	|0|0	|0|0	|0|0	|0|0	|0|0	|0|0	|0|0	|0|0	|0|0	|0|0	|0|0	|0|0	|0|0	|0|0	|0|0	0|40|0	|0|0	|0|0	|0|0	|0|0	|0|0	|0|0	|0|0	|0|0	|0|0	|0|0	|0|0
7	|0|0	|0|0	|0|0	|0|0	|0|0	|0|0	|0|0	|0|0	|0|0	|0|0	|0|0	|0|0	|0|0	|0|0	|0|0	|0|0	|0|0	|0|0	|0|0	|0|0	|0|0	|0|0	|0|0	|0|0	|0|0	|0|0	|0|0	|0|0	|0|0	|0|0	|0|0	|0|0	|0|0	|0|0	|0|0	|0|0	|0|0	|0|0	|0|0	|0|0	|0|0	|0|0	|0|0	|0|0	|0|0	|0|0	|0|0	|0|0	|0|0
8	|0|0	|0|0	|0|0	|0|0	|0|0	|0|0	|0|0	|0|0	|0|0	|0|0	|0|0	|0|0	|0|0	|0|0	|0|0	|0|0	|0|0	|0|0	|0|0	|0|0	|0|0	|0|0	|0|0	|0|0	|0|0	|0|0	|0|0	|0|0	|0|0	|0|0	|0|0	|0|0	|0|0	|0|0	|0|0	|0|0	|0|0	|0|0	|0|0	|0|0	|0|0	|0|0	|0|0	|0|0	|0|0	|0|0	|0|0	|0|0	|0|0
9	|0|0	|0|0	|0|0	|0|0	|0|0	|0|0	|0|0	|0|0	|0|0	|0|0	|0|0	|0|0	|0|0	|0|0	|0|0	|0|0	|0|0	|0|0	|0|0	|0|0	|0|0	|0|0	|0|0	|0|0	|0|0	|0|0	|0|0	|0|0	|0|0	|0|0	|0|0	|0|0	|0|0	|0|0	|0|0	|0|0	|0|0	|0|0	|0|0	|0|0	|0|0	|0|0	|0|0	|0|0	|0|0	|0|0	|0|0	|0|0	|0|0
10	|0|0	|0|0	|0|0	|0|0	|0|0	|0|0	|0|0	|0|0	|0|0	|0|0	|0|0	|0|0	|0|0	|0|0	|0|0	|0|0	|0|0	|0|0	|0|0	|0|0	|0|0	|0|0	|0|0	|0|0	|0|0	|0|0	|0|0	|0|0	|0|0	|0|0	|0|0	|0|0	|0|0	|0|0	|0|0	|0|0	|0|0	|0|0	|0|0	|0|0	|0|0	|0|0	|0|0	|0|0	|0|0	|0|0	|0|0	|0|0	|0|0
11	|0|0	|0|0	|0|0	|0|0	|0|0	|0|0	|0|0	|0|0	|0|0	|0|0	|0|0	|0|0	|0|0	|0|0	|0|0	|0|0	|0|0	|0|0	|0|0	|0|0	|0|0	|0|0	|0|0	|0|0	|0|0	|0|0	|0|0	|0|0	|0|0	|0|0	|0|0	|0|0	|0|0	|0|0	|0|0	|0|0	|0|0	|0|0	|0|0	|0|0	|0|0	|0|0	|0|0	|0|0	|0|0	|0|0	|0|0	|0|0	|0|0
12	|0|0	|0|0	|0|0	|0|0	|0|0	|0|0	|0|0	|0|0	|0|0	|0|0	|0|0	|0|0	|0|0	|0|0	|0|0	|0|0	|0|0	|0|0	|0|0	|0|0	|0|0	|0|0	|0|0	|0|0	|0|0	|0|0	|0|0	|0|0	|0|0	|0|0	|0|0	|0|0	|0|0	|0|0	|0|0	|0|0	|0|0	|0|0	|0|0	|0|0	|0|0	|0|0	|0|0	|0|0	|0|0	|0|0	|0|0	|0|0	|0|0
13	|0|0	|0|0	|0|0	|0|0	|0|0	|0|0	|0|0	|0|0	|0|0	|0|0	|0|0	|0|0	|0|0	|0|0	|0|0	|0|0	|0|0	|0|0	|0|0	|0|0	|0|0	|0|0	|0|0	|0|0	|0|0	|0|0	|0|0	|0|0	|0|0	|0|0	|0|0	|0|0	|0|0	|0|0	|0|0	|0|0	|0|0	|0|0	|0|0	|0|0	|0|0	|0|0	|0|0	|0|0	|0|0	|0|0	|0|0	|0|0	|0|0
14	|0|0	|0|0	|0|0	|0|0	|0|0	|0|0	|0|0	|0|0	|0|0	|0|0	|0|0	|0|0	|0|0	|0|0	|0|0	|0|0	|0|0	|0|0	|0|0	|0|0	|0|0	|0|0	|0|0	|0|0	|0|0	|0|0	|0|0	|0|0	|0|0	|0|0	|0|0	|0|0	|0|0	|0|0	|0|0	|0|0	|0|0	|0|0	|0|0	|0|0	|0|0	|0|0	|0|0	|0|0	|0|0	|0|0	|0|0	|0|0	|0|0
15	|0|0	|0|0	|0|0	|0|0	|0|0	|0|0	|0|0	|0|0	|0|0	|0|0	|0|0	|0|0	|0|0	|0|0	|0|0	|0|0	|0|0	|0|0	|0|0	|0|0	|0|0	|0|0	|0|0	|0|0	|0|0	|0|0	|0|0	|0|0	|0|0	|0|0	|0|0	|0|0	|0|0	|0|0	|0|0	|0|0	|0|0	|0|0	|0|0	|0|0	|0|0	|0|0	|0|0	|0|0	|0|0	|0|0	|0|0	|0|0	|0|0
16	|0|0	|0|0	|0|0	|0|0	|0|0	|0|0	|0|0	|0|0	|0|0	|0|0	|0|0	|0|0	|0|0	|0|0	|0|0	|0|0	|0|0	|0|0	|0|0	|0|0	|0|0	|0|0	|0|0	|0|0	|0|0	|0|0	|0|0	|0|0	|0|0	|0|0	|0|0	|0|0	|0|0	|0|0	|0|0	|0|0	|0|0	|0|0	|0|0	|0|0	|0|0	|0|0	|0|0	|0|0	|0|0	|0|0	|0|0	|0|0	|0|0
17	|0|0	|0|0	|0|0	|0|0	|0|0	|0|0	|0|0	|0|0	|0|0	|0|0	|0|0	|0|0	|0|0	|0|0	|0|0	|0|0	|0|0	|0|0	|0|0	|0|0	|0|0	|0|0	|0|0	|0|0	|0|0	|0|0	|0|0	|0|0	|0|0	|0|0	|0|0	|0|0	|0|0	|0|0	|0|0	|0|0	|0|0	|0|0	|0|0	|0|0	|0|0	|0|0	|0|0	|0|0	|0|0	|0|0	|0|0	|0|0	|0|0
18	|0|0	|0|0	|0|0	|0|0	|0|0	|0|0	|0|0	|0|0	|0|0	|0|0	|0|0	|0|0	|0|0	|0|0	|0|0	|0|0	|0|0	|0|0	|0|0	|0|0	|0|0	|0|0	|0|0	|0|0	|0|0	|0|0	|0|0	|0|0	|0|0	|0|0	|0|0	|0|0	|0|0	|0|0	|0|0	|0|0	|0|0	|0|0	|0|0	|0|0	|0|0	|0|0	|0|0	|0|0	|0|0	|0|0	|0|0	|0|0	|0|0
19	|0|0	|0|0	|0|0	|0|0	|0|0	|0|0	|0|0	|0|0	|0|0	|0|0	|0|0	|0|0	|0|0	|0|0	|0|0	|0|0	|0|0	|0|0	|0|0	|0|0	|0|0	|0|0	|0|0	|0|0	|0|0	|0|0	|0|0	|0|0	|0|0	|0|0	|0|0	|0|0	|0|0	|0|0	|0|0	|0|0	|0|0	|0|0	|0|0	|0|0	|0|0	|0|0	|0|0	|0|0	|0|0	|0|0	|0|0	|0|0	|0|0
20	|0|0	|0|0	|0|0	|0|0	|0|0	|0|0	|0|0	|0|0	|0|0	|0|0	|0|0	|0|0	|0|0	|0|0	|0|0	|0|0	|0|0	|0|0	|0|0	|0|0	|0|0	|0|0	|0|0	|0|0	|0|0	|0|0	|0|0	|0|0	|0|0	|0|0	|0|0	|0|0	|0|0	|0|0	|0|0	|0|0	|0|0	|0|0	|0|0	|0|0	|0|0	|0|0	|0|0	|0|0	|0|0	|0|0	|0|0	|0|0	|0|0
21	|0|0	|0|0	|0|0	|0|0	|0|0	|0|0	|0|0	|0|0	|0|0	|0|0	|0|0	|0|0	|0|0	|0|0	|0|0	|0|0	|0|0	|0|0	|0|0	|0|0	|0|0	|0|0	|0|0	|0|0	|0|0	|0|0	|0|0	|0|0	|0|0	|0|0	|0|0	|0|0	|0|0	|0|0	|0|0	|0|0	|0|0	|0|0	|0|0	|0|0	|0|0	|0|0	|0|0	|0|0	|0|0	|0|0	|0|0	|0|0	|0|0
22	|0|0	|0|0	|0|0	|0|0	|0|0	|0|0	|0|0	|0|0	|0|0	|0|0	|0|0	|0|0	|0|0	|0|0	|0|0	|0|0	|0|0	|0|0	|0|0	|0|0	|0|0	|0|0	|0|0	|0|0	|0|0	|0|0	|0|0	|0|0	|0|0	|0|0	|0|0	|0|0	|0|0	|0|0	|0|0	|0|0	|0|0	|0|0	|0|0	|0|0	|0|0	|0|0	|0|0	|0|0	|0|0	|0|0	|0|0	|0|0	|0|0
23	|0|0	|0|0	|0|0	|0|0	|0|0	|0|0	|0|0	|0|0	|0|0	|0|0	|0|0	|0|0	|0|0	|0|0	|0|0	|0|0	|0|0	|0|0	|0|0	|0|0	|0|0	|0|0	|0|0	|0|0	|0|0	|0|0	|0|0	|0|0	|0|0	|0|0	|0|0	|0|0	|0|0	|0|0	|0|0	|0|0	|0|0	|0|0	|0|0	|0|0	|0|0	|0|0	|0|0	|0|0	|0|0	|0|0	|0|0	|0|0	|0|0
24	|0|0	|0|0	|0|0	|0|0	|0|0	|0|0	|0|0	|0|0	|0|0	|0|0	|0|0	|0|0	|0|0	|0|0	|0|0	|0|0	|0|0	|0|0	|0|0	|0|0	|0|0	|0|0	|0|0	|0|0	|0|0	|0|0	|0|0	|0|0	|0|0	|0|0	|0|0	|0|0	|0|0	|0|0	|0|0	|0|0	|0|0	|0|0	|0|0	|0|0	|0|0	|0|0	|0|0	|0|0	|0|0	|0|0	|0|0	|0|0	|0|0
25	|0|0	|0|0	|0|0	|0|0	|0|0	|0|0	|0|0	|0|0	|0|0	|0|0	|0|0	|0|0	|0|0	|0|0	|0|0	|0|0	|0|0	|0|0	|0|0	|0|0	|0|0	|0|0	|0|0	|0|0	|0|0	|0|0	|0|0	|0|0	|0|0	|0|0	|0|0	|0|0	|0|0	|0|0	|0|0	|0|0	|0|0	|0|0	|0|0	|0|0	|0|0	|0|0	|0|0	|0|0	|0|0	|0|0	|0|0	|0|0	|0|0
Details report:
VAERS ID	Vaccine Code	Vaccine Name	Vax lot	Vax series	Vax route	Age	Gender	Onset
152278	HEP	HEP B (RECOMBIVAX HB)	0994J	3	IM	15	M	3
153574	HEP	HEP B (RECOMBIVAX HB)	0318K	1	IM	9	M	8
153574	MMR	MEASLES + MUMPS + RUBELLA (MMR II)	0049K	2	SC	9	M	8
153974	MMR	MEASLES + MUMPS + RUBELLA (MMR II)	1079J	UNK	SC	9	F	2
160512	DTAP	DTAP (ACEL-IMUNE)	466022	4	IM	1.6	F	3
160512	HBPV	HIB POLYSACCHARIDE (HIBIMUNE)	458725	UNK		1.6	F	3
160512	IPV	POLIO VIRUS, INACT. (POLIOVAX)	R1329	3		1.6	F	3
160512	PNC	PNEUMO (PREVNAR)	471653	1	IM	1.6	F	3
161154	VARCEL	VARICELLA (VARIVAX)	0761K	1	SC	10	F	14
165008	PNC	PNEUMO (PREVNAR)	474718	UNK		2	M	5
166878	VARCEL	VARICELLA (VARIVAX)	0437K	1	IM	5	F	12
168558	HEP	HEP B (RECOMBIVAX HB)	1400	1	IM	8	F	43
168615	HBHEPB	HIB + HEP B (COMVAX)	1523K	1	IM	1.08	M	4
168615	IPV	POLIO VIRUS, INACT. (POLIOVAX)	506	3	SC	1.08	M	4
168615	PNC	PNEUMO (PREVNAR)	474728	1	IM	1.08	M	4
168615	VARCEL	VARICELLA (VARIVAX)	0546K	1	SC	1.08	M	4
172074	VARCEL	VARICELLA (VARIVAX)	6356051151K	2	SC	4	F	0
171978	DTP	DTP (NO BRAND NAME)		UNK		5	F	3
171978	IPV	POLIO VIRUS, INACT. (NO BRAND NAME)		UNK		5	F	3
171978	MMR	MEASLES + MUMPS + RUBELLA (MMR II)		UNK		5	F	3
173044	HEP	HEP B (ENGERIX-B)	5215B9	1	IM	7.75	M	4
173044	HEPA	HEP A (HAVRIX)	698C9	1	IM	7.75	M	4
174407	IPV	POLIO VIRUS, INACT. (POLIOVAX)	T0697	4		5	M	2
174407	MMR	MEASLES + MUMPS + RUBELLA (MMR II)	1510K	2	SC	5	M	2
174500	DTAP	DTAP (TRIPEDIA)	U0378AA	1	IM	0.3	M	6
174500	HIBV	HIB (HIBTITER)	0057L	1	IM	0.3	M	6
174500	PNC	PNEUMO (PREVNAR)	477454	1	IM	0.3	M	6
174552	PNC	PNEUMO (PREVNAR)	481545	UNK	IM	1.5	M	0
174850	PNC	PNEUMO (PREVNAR)	473351	1	IM	3	F	1
175301	DTAP	DTAP (TRIPEDIA)	UO276CA	UNK	IM	2.5	F	4
175301	HBHEPB	HIB + HEP B (NO BRAND NAME)		UNK		2.5	F	4
175301	IPV	POLIO VIRUS, INACT. (POLIOVAX)	T0186	UNK	IM	2.5	F	4
175301	PNC	PNEUMO (PREVNAR)	472036	UNK	IM	2.5	F	4
177426	DTAP	DTAP (INFANRIX)	98A42	5	IM	5	F	3
177426	IPV	POLIO VIRUS, INACT. (NO BRAND NAME)	R0692	1	SC	5	F	3
177426	MMR	MEASLES + MUMPS + RUBELLA (MMR II)	1383K	2	SC	5	F	3
177971	MMR	MEASLES + MUMPS + RUBELLA (NO BRAND NAME)		UNK	SC	4	M	3
180957	MMR	MEASLES + MUMPS + RUBELLA (MMR II)	0901K	2	SC	7	F	18
182349	HEP	HEP B (RECOMBIVAX HB)	1652K	1		11	F	16
183994	DTAP	DTAP (INFANRIX)	530A2	3	IM	0.6	F	1
183994	IPV	POLIO VIRUS, INACT. (IPOL)	T0816	3	SC	0.6	F	1
183994	PNC	PNEUMO (PREVNAR)	482371	3	IM	0.6	F	1
184712	HEP	HEP B (RECOMBIVAX HB)	1422K	1	IM	12	M	33
184712	VARCEL	VARICELLA (VARIVAX)	0533K	1	SC	12	M	33
186489	MEN	MENINGOCOCCAL (MENOMUNE)	UB118AA	1	SC	17	F	11
192873	MMR	MEASLES + MUMPS + RUBELLA (MMR II)	1090L	2	SC	5	M	386
209496	DTAP	DTAP (TRIPEDIA)	U0997BA	5	IM	5	F	27
209496	IPV	POLIO VIRUS, INACT. (POLIOVAX)	W0907	4	SC	5	F	27
209496	MMR	MEASLES + MUMPS + RUBELLA (MMR II)	0273N	2	SC	5	F	27
212460	PNC	PNEUMO (PREVNAR)	494318	4	IM	1.5	M	1
215512	RUB	RUBELLA (MERUVAX II)		UNK		39	F
227178	DTAP	DTAP (NO BRAND NAME)		UNK		5	M	1
227178	HEPA	HEP A (NO BRAND NAME)		UNK		5	M	1
227178	HIBV	HIB (NO BRAND NAME)		UNK		5	M	1
227178	IPV	POLIO VIRUS, INACT. (NO BRAND NAME)		UNK		5	M	1
227178	MMR	MEASLES + MUMPS + RUBELLA (NO BRAND NAME)		UNK		5	M	1
228903	FLU3	INFLUENZA (SEASONAL) (FLUZONE)	U1489AA	3	IM	6	F	1
233612	DTAP	DTAP (TRIPEDIA)	U13070B	5	IM	6	F	2
233612	FLU3	INFLUENZA (SEASONAL) (FLUZONE)	U1381AA	1	IM	6	F	2
234179	DTAP	DTAP (TRIPEDIA)	U1300DA	4	IM	4	M	2
234179	IPV	POLIO VIRUS, INACT. (IPOL)	X1191	4	IM	4	M	2
245835	MNQ	MENINGOCOCCAL CONJUGATE (MENACTRA)	U1684AA	1	IM	19	M	26
246271	FLU3	INFLUENZA (SEASONAL) (FLUZONE)	U1746AA	6	IM	7	M	3
246476	FLU3	INFLUENZA (SEASONAL) (FLUZONE)	U1839AA	2	IM	6	M	1
246477	FLU3	INFLUENZA (SEASONAL) (FLUZONE)	U1763JA	3	IM	1.66	M	1
247303	FLU3	INFLUENZA (SEASONAL) (FLUZONE)	U1743JA	1	IM	0.76	M	3
249967	FLU3	INFLUENZA (SEASONAL) (FLUZONE)	U1743NA	UNK	IM	3	F	20
267702	FLUN3	INFLUENZA (SEASONAL) (FLUMIST)	500441P	1	IN	10	M	2
268931	FLU3	INFLUENZA (SEASONAL) (FLUZONE)	U2239AA	1		5	M	29
274444	MNQ	MENINGOCOCCAL CONJUGATE (MENACTRA)	U2119AA	UNK		14	F	8
274444	TDAP	TDAP (BOOSTRIX)	AC52B01AA	1	IM	14	F	8
277385	HEPA	HEP A (HAVRIX)	AHAVB129AA	2	IM	13	F	17
277385	HPV4	HPV (GARDASIL)	114	1	IM	13	F	17
277385	MNQ	MENINGOCOCCAL CONJUGATE (MENACTRA)	42159AA	1	IM	13	F	17
277542	DTAP	DTAP (DAPTACEL)	C2490AA	5	IM	4	F	2
277542	IPV	POLIO VIRUS, INACT. (IPOL)	Y1032	4	IM	4	F	2
277542	MMRV	MEASLES + MUMPS + RUBELLA + VARICELLA (PROQUAD)	0227U	1	SC	4	F	2
277907	FLU3	INFLUENZA (SEASONAL) (FLUZONE)	U2239AA	3	UN	8	F	1
278654	HPV4	HPV (GARDASIL)	0688F	1	IM	13	F	57
280142	MMR	MEASLES + MUMPS + RUBELLA (MMR II)	0898L	1	SC	1	F	797
280142	PNC	PNEUMO (PREVNAR)	481548	4	IM	1	F	797
280142	VARCEL	VARICELLA (VARIVAX)	0795L	1	SC	1	F	797
280037	HEPA	HEP A (HAVRIX)	AHAVB124BA	1		4	F	9
281096	HPV4	HPV (GARDASIL)	1424F	1	IM	21	F	41
296424	MMR	MEASLES + MUMPS + RUBELLA (MMR II)	0426U	UNK	SC	1.1	M	9
296424	VARCEL	VARICELLA (VARIVAX)		UNK	UN	1.1	M	9
297206	FLUN3	INFLUENZA (SEASONAL) (FLUMIST)	500487P	1	IN	4	F	9
302796	FLUN3	INFLUENZA (SEASONAL) (FLUMIST)	500491P	UNK	IN	4	M	21
304104	FLU3	INFLUENZA (SEASONAL) (FLUZONE)	U2525AA	3	UN	3	F	1
304104	HEPA	HEP A (HAVRIX)	AHAVB17VA	2	UN	3	F	1
304240	FLU3	INFLUENZA (SEASONAL) (FLUZONE)	U2481GA	3	IM	2	M	2
304509	HPV4	HPV (GARDASIL)	1446U	1	UN	13	F	5
304509	MNQ	MENINGOCOCCAL CONJUGATE (MENACTRA)	V2428AA	1	UN	13	F	5
304509	TDAP	TDAP (BOOSTRIX)	AC52B021BA	1	UN	13	F	5
307065	FLU3	INFLUENZA (SEASONAL) (FLUVIRIN)	78990	2	UN	75	M	1
309109	HEP	HEP B (RECOMBIVAX HB)	1610U	3	UN	1.3	M	1
309109	MMR	MEASLES + MUMPS + RUBELLA (MMR II)	1670U	1	UN	1.3	M	1
309109	VARCEL	VARICELLA (VARIVAX)	1796U	1	UN	1.3	M	1
319920	HEPA	HEP A (HAVRIX)	AHAVB129AA	1	IM	1	F	3
319920	MMR	MEASLES + MUMPS + RUBELLA (MMR II)	0482X	1	SC	1	F	3
319920	PNC	PNEUMO (PREVNAR)	853981A	4	IM	1	F	3
319920	VARCEL	VARICELLA (VARIVAX)	0092X	1	SC	1	F	3
323699	HEP	HEP B (RECOMBIVAX HB)		UNK	UN		U
324105	VARCEL	VARICELLA (VARIVAX)	0169X	2	SC	8	M	2
330006	FLU3	INFLUENZA (SEASONAL) (FLUZONE)	U2763AA	3	IM	5	F	1
330307	FLUN3	INFLUENZA (SEASONAL) (FLUMIST)	500569P	1	IN	8	M	2
330541	FLUN3	INFLUENZA (SEASONAL) (FLUMIST)	500563P	1	IN	6	F	2
332098	HPV4	HPV (GARDASIL)	0955f	2	IM	13	F	20
332980	FLUN3	INFLUENZA (SEASONAL) (FLUMIST)	500546P	1	IN	3	F	6
333684	FLUN3	INFLUENZA (SEASONAL) (FLUMIST)	500559P	1	IN	6	F	1
334501	FLUX	INFLUENZA (SEASONAL) (NO BRAND NAME)	881291P	2	IM	4	F	19
334564	FLU3	INFLUENZA (SEASONAL) (FLUZONE)	UT2782CA	4	IM	1.9	F	14
349267	MMR	MEASLES + MUMPS + RUBELLA (NO BRAND NAME)		UNK		1.25	M	1
350360	DTAP	DTAP (INFANRIX)	GSKAC14B066AA	5	IM	4	F	1
350360	IPV	POLIO VIRUS, INACT. (IPOL)	APB0475	4	IM	4	F	1
350360	MMR	MEASLES + MUMPS + RUBELLA (MMR II)	7954	2	SC	4	F	1
350360	VARCEL	VARICELLA (VARIVAX)	6934	2	SC	4	F	1
353201	HPV4	HPV (GARDASIL)	1757U	1	IM	15	F	4
353633	DTAP	DTAP (INFANRIX)	AC14B100AA	5	IM	5	F	9
353633	HEPA	HEP A (HAVRIX)	AHAVB350BA	2	IM	5	F	9
353633	IPV	POLIO VIRUS, INACT. (IPOL)	B1090	4	IM	5	F	9
353633	VARCEL	VARICELLA (VARIVAX)	0682Y	2	SC	5	F	9
355315	FLUN3	INFLUENZA (SEASONAL) (FLUMIST)	500540P	1	IN	5	M	0
355584	FLUN3	INFLUENZA (SEASONAL) (FLUMIST)	500585P	1	OT	6	M	5
356677	FLUN3	INFLUENZA (SEASONAL) (FLUMIST)	500675P	2	IN	3	M	11
357832	HEPA	HEP A (NO BRAND NAME)		UNK	UN	11	M	9
357832	TD	TD ADSORBED (NO BRAND NAME)		UNK	UN	11	M	9
358894	VARCEL	VARICELLA (VARIVAX)	0689Y	1	UN	9	F	5
360401	DTAP	DTAP (DAPTACEL)	C3139AA	5	IM	4	M	1
360401	FLU3	INFLUENZA (SEASONAL) (FLUZONE)	U3259EA	1	IM	4	M	1
360401	VARCEL	VARICELLA (VARIVAX)	0882Y	2	SC	4	M	1
361725	FLU3	INFLUENZA (SEASONAL) (FLUZONE)	U3210AA	4	IM	8	M	4
364630	FLU3	INFLUENZA (SEASONAL) (FLUZONE)	U3211AA	4	IM	5	M	2
364868	FLU(H1N1)	INFLUENZA (H1N1) (H1N1 (MONOVALENT) (SANOFI))	UP007AA	UNK		3	F	5
364868	FLUX	INFLUENZA (SEASONAL) (NO BRAND NAME)	U3186AA	UNK		3	F	5
366951	FLUN(H1N1)	INFLUENZA (H1N1) (H1N1 (MONOVALENT) (MEDIMMUNE))	500763P	2	IN	3	M	14
367415	FLUN(H1N1)	INFLUENZA (H1N1) (H1N1 (MONOVALENT) (MEDIMMUNE))	500779P	1	IN	6	M	15
367415	FLUX	INFLUENZA (SEASONAL) (NO BRAND NAME)	97847P1 VIS	1	IM	6	M	15
367427	FLUN(H1N1)	INFLUENZA (H1N1) (H1N1 (MONOVALENT) (MEDIMMUNE))		UNK	IN	4	M	0
367890	FLU(H1N1)	INFLUENZA (H1N1) (H1N1 (MONOVALENT) (SANOFI))	UP009AA	UNK	UN	11	M	2
369792	FLUN(H1N1)	INFLUENZA (H1N1) (H1N1 (MONOVALENT) (MEDIMMUNE))	500751P	UNK	IN	5	M	2
371272	FLU(H1N1)	INFLUENZA (H1N1) (H1N1 (MONOVALENT) (NOVARTIS))	1009232P	1	IM	17	F	0
372457	FLUN(H1N1)	INFLUENZA (H1N1) (H1N1 (MONOVALENT) (MEDIMMUNE))	500759	1		9	M	0
373336	DTAPIPVHIB	DTAP + IPV + HIB (PENTACEL)		UNK	UN	0.5	M	2
373336	HEP	HEP B (ENGERIX-B)		UNK	UN	0.5	M	2
373336	PNC	PNEUMO (PREVNAR)		UNK	UN	0.5	M	2
373475	FLU(H1N1)	INFLUENZA (H1N1) (H1N1 (MONOVALENT) (NOVARTIS))	102041P1	1	IM	6	M	1
373628	FLU3	INFLUENZA (SEASONAL) (FLUZONE)	U3259EA	1	IM	4	F	7
373717	HEPA	HEP A (HAVRIX)	AHAVB336DA	1	UN	9	M
373717	VARCEL	VARICELLA (VARIVAX)	1591U	1	UN	9	M
375029	DTAPIPVHIB	DTAP + IPV + HIB (PENTACEL)		UNK	UN	0.5	M	2
375029	HEP	HEP B (ENGERIX-B)		UNK	UN	0.5	M	2
375029	PNC	PNEUMO (PREVNAR)		UNK	UN	0.5	M	2
375843	FLUN(H1N1)	INFLUENZA (H1N1) (H1N1 (MONOVALENT) (MEDIMMUNE))	500800P	2	IN	5	F	0
375879	FLUN(H1N1)	INFLUENZA (H1N1) (H1N1 (MONOVALENT) (MEDIMMUNE))	500780P	1	IN	4	F	28
375925	FLU(H1N1)	INFLUENZA (H1N1) (H1N1 (MONOVALENT) (SANOFI))	UP019AA	UNK	IM	7	F	17
375926	FLU(H1N1)	INFLUENZA (H1N1) (H1N1 (MONOVALENT) (SANOFI))	UP019AA	UNK	IM	7	M	28
376573	FLU(H1N1)	INFLUENZA (H1N1) (H1N1 (MONOVALENT) (SANOFI))	U25047A	2	UN	5	F	4
376573	HEPA	HEP A (NO BRAND NAME)	1254Y	UNK	UN	5	F	4
377755	FLU3	INFLUENZA (SEASONAL) (FLUZONE)	97845P2	1	IM	5	M	26
377779	FLUN(H1N1)	INFLUENZA (H1N1) (H1N1 (MONOVALENT) (MEDIMMUNE))	500805P	1	IN	8	F	27
381367	FLU(H1N1)	INFLUENZA (H1N1) (H1N1 (MONOVALENT) (NOVARTIS))		UNK	IM	12	F	60
381909	FLU3	INFLUENZA (SEASONAL) (FLUZONE)	U3192AA	UNK	IM	9	F	10
383504	VARZOS	ZOSTER LIVE (ZOSTAVAX)		UNK	UN		M	38
383825	FLU(H1N1)	INFLUENZA (H1N1) (H1N1 (MONOVALENT) (NOVARTIS))	102041P1	2	IM	6	F	50
385088	HPV4	HPV (GARDASIL)	0229X	1	IM	11	F	21
385088	MNQ	MENINGOCOCCAL CONJUGATE (MENACTRA)	U3018AA	1	IM	11	F	21
385088	TDAP	TDAP (BOOSTRIX)	AC52B037AA	6	IM	11	F	21
385088	VARCEL	VARICELLA (VARIVAX)	1233Y	2	SC	11	F	21
386249	HPV4	HPV (GARDASIL)		1	UN	15	F	3
386302	FLU3	INFLUENZA (SEASONAL) (FLUZONE)	U3205CA	1	IM	8	F	28
387798	VARCEL	VARICELLA (VARIVAX)		UNK	UN	0.96	F
394148	HEPA	HEP A (VAQTA)	0245Z	1	IM	1.15	F	9
394148	MMR	MEASLES + MUMPS + RUBELLA (MMR II)	1357Y	1	SC	1.15	F	9
394148	PNC13	PNEUMO (PREVNAR13)	E49133	4	IM	1.15	F	9
394148	VARCEL	VARICELLA (VARIVAX)	1656Y	1	SC	1.15	F	9
396972	MEN	MENINGOCOCCAL (MENOMUNE)		UNK	IJ	18	F	10
397175	VARCEL	VARICELLA (VARIVAX)	11514	2	SC	5	F	18
402614	MMR	MEASLES + MUMPS + RUBELLA (MMR II)	0679Y	2	SC	5	M	30
403877	FLU3	INFLUENZA (SEASONAL) (FLUZONE)	UT3569BA	UNK	UN	6	M	4
404308	FLUX	INFLUENZA (SEASONAL) (NO BRAND NAME)		UNK		3	M	0
404914	FLUN3	INFLUENZA (SEASONAL) (FLUMIST)	501009P	1	IN	3	F	1
404914	PNC13	PNEUMO (PREVNAR13)	914506	1	UN	3	F	1
407301	HBHEPB	HIB + HEP B (COMVAX)	0695R	3	UN	0.31	F
408950	FLUN3	INFLUENZA (SEASONAL) (FLUMIST)	501057P	4	IN	10	M	0
411421	HPV4	HPV (GARDASIL)	0664Z	2	IM	17	F	15
411705	FLUN3	INFLUENZA (SEASONAL) (FLUMIST)	501045P	1	IN	3	F	9
412465	DTAP	DTAP (DAPTACEL)		5	IM	7	M	7
420110	DTAP	DTAP (DAPTACEL)	C3358AA	5	IM	4	M	2
420110	FLUN3	INFLUENZA (SEASONAL) (FLUMIST)	5010T1P	4	IN	4	M	2
420110	IPV	POLIO VIRUS, INACT. (POLIOVAX)	D0848	4	IM	4	M	2
420110	MMRV	MEASLES + MUMPS + RUBELLA + VARICELLA (PROQUAD)	1365Z	2	IM	4	M	2
420110	PNC	PNEUMO (PREVNAR)	915065	5	IM	4	M	2
420468	FLU3	INFLUENZA (SEASONAL) (FLUZONE)	U3579DA	2	IM	7	M	15
423108	VARCEL	VARICELLA (VARIVAX)		UNK	UN	2	F	396
424826	PNC13	PNEUMO (PREVNAR13)	915371	UNK	IM	3	M	10
435004	FLU3	INFLUENZA (SEASONAL) (FLUARIX)	AFLUA631CA	3	IM	3	M	2
436168	TDAP	TDAP (ADACEL)	C3540AA	1	IM	11	M	29
440360	FLU3	INFLUENZA (SEASONAL) (FLUZONE)	UT443AA	3	IM	3	F	1
440524	FLU3	INFLUENZA (SEASONAL) (FLUZONE)	UH477AC	4	IM	3	F	1
442814	FLU3	INFLUENZA (SEASONAL) (FLUZONE)	U4122BA	3	IM	3	M	0
448599	DTAP	DTAP (DAPTACEL)	L3618AA	5	IM	4	M	2
448599	IPV	POLIO VIRUS, INACT. (IPOL)	H1305	4	UN	4	M	2
448825	DTAPIPV	DTAP + IPV (KINRIX)	AC20B196CA	5	IM	4	M	2
448825	MMR	MEASLES + MUMPS + RUBELLA (MMR II)	0871AA	2	SC	4	M	2
448825	PNC13	PNEUMO (PREVNAR13)	F1177	1	IM	4	M	2
450539	FLUN3	INFLUENZA (SEASONAL) (FLUMIST)		UNK	IN	8	M	49
468605	VARZOS	ZOSTER LIVE (ZOSTAVAX)	0658AA	UNK	SC	58	F	3
465757	DTAPIPV	DTAP + IPV (KINRIX)		UNK	UN	5	M
465757	MMR	MEASLES + MUMPS + RUBELLA (NO BRAND NAME)		UNK	UN	5	M
465757	VARCEL	VARICELLA (NO BRAND NAME)		UNK	UN	5	M
470212	FLU3	INFLUENZA (SEASONAL) (FLUZONE)	U4545FA	7+	IM	8	M	1
477395	RAB	RABIES (RABAVERT)		UNK	IM	9	M	1
478198	FLUX	INFLUENZA (SEASONAL) (NO BRAND NAME)		UNK		6	F	23
484995	FLU3	INFLUENZA (SEASONAL) (FLUZONE)	UH734AB	1	IM	12	M	1
484995	HEPA	HEP A (HAVRIX)	AHAVB577CA	2	IM	12	M	1
484995	HPV4	HPV (GARDASIL)	0636AE	1	IM	12	M	1
484995	MNQ	MENINGOCOCCAL CONJUGATE (MENACTRA)	U4283AA	1	IM	12	M	1
484995	TDAP	TDAP (ADACEL)	C4009AA	6	IM	12	M	1
486210	DTAP	DTAP (NO BRAND NAME)		1	IM	63	F	1
486210	PPV	PNEUMO (NO BRAND NAME)		2	IM	63	F	1
491679	HEP	HEP B (RECOMBIVAX HB)	H014132	3	IM	0.76	F	1
494501	DTAP	DTAP (INFANRIX)	AC14B177BA	4	UN	1	M	0
494501	HEPA	HEP A (HAVRIX)	AHAVB703AA	1	UN	1	M	0
494501	MMRV	MEASLES + MUMPS + RUBELLA + VARICELLA (PROQUAD)	H020134	1	UN	1	M	0
497224	TYP	TYPHOID VI POLYSACCHARIDE (TYPHIM VI)	G05081	1	IM	51	M	19
506627	DTAPIPV	DTAP + IPV (KINRIX)	9AB77	1	IM	4	M	2
506627	FLUN4	INFLUENZA (SEASONAL) (FLUMIST QUADRIVALENT)	BJ2154	3	IN	4	M	2
506627	MMRV	MEASLES + MUMPS + RUBELLA + VARICELLA (PROQUAD)	J006565	1	SC	4	M	2
507102	DTAP	DTAP (INFANRIX)	AC14B0778A	UNK		2	M	0
507102	HEPA	HEP A (VAQTA)	J000366	UNK		2	M	0
507102	HIBV	HIB (PEDVAXHIB)	J005670	UNK		2	M	0
508210	FLUN4	INFLUENZA (SEASONAL) (FLUMIST QUADRIVALENT)	bj2154	UNK	IN	12	F	0
511328	FLU3	INFLUENZA (SEASONAL) (FLUZONE)	UH920AC	UNK	IM	9	M	2
511578	FLU3	INFLUENZA (SEASONAL) (FLUZONE)	U4790AA	7+	IM	8	M	5
511578	HEP	HEP B (RECOMBIVAX HB)	J006511	4	IM	8	M	5
514798	MNQ	MENINGOCOCCAL CONJUGATE (MENACTRA)		UNK	UN	17	F	3
519548	MMR	MEASLES + MUMPS + RUBELLA (MMR II)	H018184	2	SC	5	M	1
520064	PPV	PNEUMO (PNEUMOVAX)	J013345	UNK	IM	65	F	1
520093	DTAPIPV	DTAP + IPV (KINRIX)	2B4G3	1	IM	4	F	0
520093	MMRV	MEASLES + MUMPS + RUBELLA + VARICELLA (PROQUAD)	J007202	1	SC	4	F	0
521772	DTAPIPV	DTAP + IPV (KINRIX)	AC20B267CA	UNK	IM	4	M	1
521772	MMRV	MEASLES + MUMPS + RUBELLA + VARICELLA (PROQUAD)	H019439	UNK	SC	4	M	1
523516	FLUN(H1N1)	INFLUENZA (H1N1) (H1N1 (MONOVALENT) (MEDIMMUNE))	500751P	UNK	IN	5	M
528853	DTAP	DTAP (DAPTACEL)	C4587AA	5	UN	5	M	9
528853	IPV	POLIO VIRUS, INACT. (POLIOVAX)	J1731	4	UN	5	M	9
528853	MMR	MEASLES + MUMPS + RUBELLA (MMR II)	J007156	2	SC	5	M	9
528853	VARCEL	VARICELLA (VARIVAX)	J006957	2	SC	5	M	9
539946	MMR	MEASLES + MUMPS + RUBELLA (MMR II)	J006954	3	UN	22	M
543318	MNQ	MENINGOCOCCAL CONJUGATE (MENACTRA)	U4798AA	UNK	IM	11	F	1
543318	TDAP	TDAP (ADACEL)	U4902BA	UNK	IM	11	F	1
549981	FLUN4	INFLUENZA (SEASONAL) (FLUMIST QUADRIVALENT)	CH2062	1	IN	4	M	3
550891	FLUN4	INFLUENZA (SEASONAL) (FLUMIST QUADRIVALENT)	CJ2005	UNK	IN	8	M	12
553433	FLU3	INFLUENZA (SEASONAL) (FLUZONE)	U5007AB	3	IM	1.85	F	21
555283	FLUN4	INFLUENZA (SEASONAL) (FLUMIST QUADRIVALENT)	CH2061	UNK	IN	8	M	29
560254	FLUX	INFLUENZA (SEASONAL) (NO BRAND NAME)		UNK	UN	4	M	52
561036	FLU3	INFLUENZA (SEASONAL) (FLUZONE)	UI207AB	7+	IM	6	F	2
595813	DTAPIPV	DTAP + IPV (KINRIX)	99A7M	2	IM	4	M	5
595813	MMRV	MEASLES + MUMPS + RUBELLA + VARICELLA (PROQUAD)	K009470	2	SC	4	M	5
598557	DTAPIPV	DTAP + IPV (KINRIX)	23MJ7	UNK	UN	5	M	41
598557	FLU3	INFLUENZA (SEASONAL) (FLUZONE)	UI196AB	UNK	UN	5	M	41
598557	MMRV	MEASLES + MUMPS + RUBELLA + VARICELLA (PROQUAD)	K004861	1	UN	5	M	41
604922	HPV9	HPV (GARDASIL 9)	L013429	1	IM	17	F	7
604922	MNQ	MENINGOCOCCAL CONJUGATE (MENACTRA)	U5185BA	2	IM	17	F	7
605915	FLU4	INFLUENZA (SEASONAL) (FLUZONE QUADRIVALENT)	UI443AB	1	IM	6	F	1
612812	FLUN4	INFLUENZA (SEASONAL) (FLUMIST QUADRIVALENT)	FJ2189	UNK	IN	4	M	4
622411	PNC13	PNEUMO (PREVNAR13)	M06900	1	IM	38	F	24
627021	HPV4	HPV (GARDASIL)	1019386	2	IM	10	F	180
632260	HPV4	HPV (GARDASIL)		UNK	SYR		F
646609	HEP	HEP B (RECOMBIVAX HB)	M003658	2	UN	4	M	14
646609	MMRV	MEASLES + MUMPS + RUBELLA + VARICELLA (PROQUAD)	M010476	2	UN	4	M	14
650402	MMR	MEASLES + MUMPS + RUBELLA (MMR II)	L049314	2	SC	4	F	4
650402	VARCEL	VARICELLA (VARIVAX)	M005974	2	SC	4	F	4
654685	FLU3	INFLUENZA (SEASONAL) (FLUZONE HIGH-DOSE)	01672K8	1	UN	72	M	0
660759	HPVX	HPV (NO BRAND NAME)		UNK		16	M	1
670058	HPV9	HPV (GARDASIL 9)	L014415	1	UN	13	F	262
671179	VARCEL	VARICELLA (VARIVAX)		UNK		5	M	82
675681	DTAPIPVHIB	DTAP + IPV + HIB (PENTACEL)	C5226AA	UNK	IM	1.75	F	9
675681	FLU4	INFLUENZA (SEASONAL) (FLUZONE QUADRIVALENT)	UI5663JA	1	IM	1.75	F	9
675681	PNC13	PNEUMO (PREVNAR13)	N34937	3	IM	1.75	F	9
676975	TD	TD ADSORBED (TDVAX)	J1AH400012	UNK	IM	7	F
679361	DTAPIPVHIB	DTAP + IPV + HIB (PENTACEL)		UNK	IM	0.5	F	1
679361	PNC13	PNEUMO (PREVNAR13)		UNK	IM	0.5	F	1
679361	RV1	ROTAVIRUS (ROTARIX)		UNK	PO	0.5	F	1
681237	MMRV	MEASLES + MUMPS + RUBELLA + VARICELLA (PROQUAD)	M031941	3	SC	5	M	6
682386	FLU4	INFLUENZA (SEASONAL) (FLUZONE QUADRIVALENT)	UT56635A	2	UN	0.67	F	30
689480	DTAPIPV	DTAP + IPV (QUADRACEL)	C5222AA	UNK	IM	6	F	3
689480	HEP	HEP B (RECOMBIVAX HB)	M039642	5	IM	6	F	3
689480	MMR	MEASLES + MUMPS + RUBELLA (MMR II)	M032485	3	SC	6	F	3
700903	HEPA	HEP A (NO BRAND NAME)		1	UN	1.08	F	11
700903	MMR	MEASLES + MUMPS + RUBELLA (NO BRAND NAME)		UNK	UN	1.08	F	11
700903	PNC13	PNEUMO (PREVNAR13)		4	UN	1.08	F	11
700903	VARCEL	VARICELLA (NO BRAND NAME)		UNK	UN	1.08	F	11
711778	TDAP	TDAP (BOOSTRIX)	7Y29Z	UNK	IM	60	F	18
711778	VARZOS	ZOSTER LIVE (ZOSTAVAX)	M036296	UNK	IM	60	F	18
714647	HEPA	HEP A (HAVRIX)	4RB4J	2	SYR	3	F	8
715674	FLU4	INFLUENZA (SEASONAL) (FLUZONE QUADRIVALENT)	UT5913jA	4	IM	2	M	3
721462	FLU4	INFLUENZA (SEASONAL) (FLUARIX QUADRIVALENT)	DT2S7	UNK	IM	5	M	2
722798	FLU4	INFLUENZA (SEASONAL) (FLUZONE QUADRIVALENT)	UT5949PA	1	IM	4	F	1
723875	DTAP	DTAP (DAPTACEL)	C5148AA	4	IM	2	F	0
723875	FLU4	INFLUENZA (SEASONAL) (FLUZONE QUADRIVALENT)	UT5934JA	N/A	IM	2	F	0
723875	VARCEL	VARICELLA (VARIVAX)	N007930	1	SC	2	F	0
724790	FLU4	INFLUENZA (SEASONAL) (FLUZONE QUADRIVALENT)	UT5897LA	UNK	IM	1.67	M	2
729085	HEP	HEP B (RECOMBIVAX HB)	M010671	3	IM	5	M	1
729085	MMR	MEASLES + MUMPS + RUBELLA (MMR II)	M000768	2	IM	5	M	1
739157	FLUA3	INFLUENZA (SEASONAL) (FLUAD)		UNK	IM	76	M	0
739207	FLU4	INFLUENZA (SEASONAL) (FLUZONE QUADRIVALENT)	U5958AA	1	IM	7	F	1
747367	DTAP	DTAP (INFANRIX)	3373Z	3	IM	5	F	13
752512	DTAP	DTAP (INFANRIX)	PT2RK	4	IM	3	M	32
752512	HEPA	HEP A (HAVRIX)	GB242	2	IM	3	M	32
753788	HPV9	HPV (GARDASIL 9)		1	SYR	12	F	28
758993	VARZOS	ZOSTER (SHINGRIX)	ZY3X4	1	IM	54	F	70
765027	DTAPIPVHIB	DTAP + IPV + HIB (PENTACEL)	C5529AA	1	IM	4	M	1
765027	MMR	MEASLES + MUMPS + RUBELLA (MMR II)	N032752	1	SC	4	M	1
765027	PNC13	PNEUMO (PREVNAR13)	T78676	1	IM	4	M	1
778381	FLU4	INFLUENZA (SEASONAL) (FLUARIX QUADRIVALENT)	EN9S4	UNK	IM	4	M	1
778540	FLU4	INFLUENZA (SEASONAL) (FLUZONE QUADRIVALENT)	UT6310MA	1	IM	4	M	4
784747	MMR	MEASLES + MUMPS + RUBELLA (MMR II)	M025607	1	SC	5	M	45
788886	FLUX	INFLUENZA (SEASONAL) (NO BRAND NAME)		2	UN		M
789419	FLUX	INFLUENZA (SEASONAL) (NO BRAND NAME)		2	IM		M
790681	FLUX	INFLUENZA (SEASONAL) (NO BRAND NAME)		UNK	IM	19	M
792837	DTAPIPV	DTAP + IPV (KINRIX)	G9P35	5	IM	5	M	1
792837	MMRV	MEASLES + MUMPS + RUBELLA + VARICELLA (PROQUAD)	R017626	2	SC	5	M	1
796827	HEPA	HEP A (VAQTA)	R006210	UNK	UN	1	M	17
796827	MMRV	MEASLES + MUMPS + RUBELLA + VARICELLA (PROQUAD)	R013126	UNK	UN	1	M	17
797757	DTAP	DTAP (DAPTACEL)	C5206AA	4	IM	1.83	M	1
797757	FLU4	INFLUENZA (SEASONAL) (FLUZONE QUADRIVALENT)	UT6259MA	N/A		1.83	M	1
797757	HEPA	HEP A (HAVRIX)	2GY7E	2		1.83	M	1
797757	HIBV	HIB (ACTHIB)	UI902AAA	2	IM	1.83	M	1
797757	PNC13	PNEUMO (PREVNAR13)	W51943	4		1.83	M	1
799307	HEPA	HEP A (HAVRIX)	A2X9E	1	UN	1	F	60
799307	MMR	MEASLES + MUMPS + RUBELLA (MMR II)	L023386	1	UN	1	F	60
799307	VARCEL	VARICELLA (VARIVAX)	L041205	1	UN	1	F	60
799740	PNC13	PNEUMO (PREVNAR13)	W51759	4	SYR	3	M	1
804958	DTAPIPVHIB	DTAP + IPV + HIB (PENTACEL)	UJ082AAA	4	IM	1.25	M	1
804958	PNC13	PNEUMO (PREVNAR13)	X49147	4	IM	1.25	M	1
806872	HEP	HEP B (RECOMBIVAX HB)		UNK	IM	4	M
811087	HPV9	HPV (GARDASIL 9)		2		17	F	67
818525	MENB	MENINGOCOCCAL B (TRUMENBA)	X46476	1	IM	16	M	0
818525	MNQ	MENINGOCOCCAL CONJUGATE (MENACTRA)	U6153AA	2	IM	16	M	0
824864	MENB	MENINGOCOCCAL B (BEXSERO)	ABX795AA	1	IM	17	F	1
826072	MNQ	MENINGOCOCCAL CONJUGATE (MENACTRA)		UNK	OT		U
831000	HEP	HEP B (NO BRAND NAME)		UNK			M
831000	HEPA	HEP A (NO BRAND NAME)		UNK			M
831422	DTAPIPV	DTAP + IPV (KINRIX)		UNK	SYR	4	F	23
831422	MMRV	MEASLES + MUMPS + RUBELLA + VARICELLA (PROQUAD)		UNK	SYR	4	F	23
831730	HEP	HEP B (RECOMBIVAX HB)		UNK	OT		M
831730	HEPA	HEP A (VAQTA)		UNK	OT		M
833612	MMR	MEASLES + MUMPS + RUBELLA (MMR II)		3	SYR	5	M	1
833612	VARCEL	VARICELLA (VARIVAX)		2	SYR	5	M	1
837783	FLU4	INFLUENZA (SEASONAL) (FLUZONE QUADRIVALENT)		UNK		5	M	6
848535	FLU4	INFLUENZA (SEASONAL) (FLUZONE QUADRIVALENT)	UJ209AA	1	IM	72	M	1
853973	UNK	VACCINE NOT SPECIFIED (NO BRAND NAME)		UNK	IM	5	F	2
855178	FLU4	INFLUENZA (SEASONAL) (FLULAVAL QUADRIVALENT)	3325F	1	IM	6	M	3
862454	FLU4	INFLUENZA (SEASONAL) (FLUZONE QUADRIVALENT)		UNK	IM	11	F	18
867625	DTAPIPV	DTAP + IPV (KINRIX)	HB717	4	IM	4	M	28
867625	MMR	MEASLES + MUMPS + RUBELLA (MMR II)	SO18592	2	SC	4	M	28
867625	VARCEL	VARICELLA (VARIVAX)	S024367	2	SC	4	M	28
871100	FLUC4	INFLUENZA (SEASONAL) (FLUCELVAX QUADRIVALENT)	261982	1	IM	23	M	12
873215	MNQ	MENINGOCOCCAL CONJUGATE (MENACTRA)	U659694	UNK	OT	11	F
873215	TDAP	TDAP (ADACEL)	U66502A	UNK	OT	11	F
874929	MMR	MEASLES + MUMPS + RUBELLA (MMR II)	S029456	1	IM	1	F	14
875517	MENB	MENINGOCOCCAL B (BEXSERO)	ABXA63AA	1	IM	10	M	7
875517	MMR	MEASLES + MUMPS + RUBELLA (MMR II)	S013536	1	SC	10	M	7
875517	MNQ	MENINGOCOCCAL CONJUGATE (MENVEO)	AMVA163A	2	IM	10	M	7
875517	PPV	PNEUMO (PNEUMOVAX)	S018405	1	IM	10	M	7
877672	FLUX	INFLUENZA (SEASONAL) (NO BRAND NAME)	UNK	UNK			F
878154	FLUX	INFLUENZA (SEASONAL) (NO BRAND NAME)		UNK	OT	4	F
882630	DTAPIPVHIB	DTAP + IPV + HIB (PENTACEL)	UJ160AA	4	IM	1.75	M	0
882630	HEPA	HEP A (HAVRIX)	T001419	2	IM	1.75	M	0
882630	PNC13	PNEUMO (PREVNAR13)		4	IM	1.75	M	0
883611	DTAP	DTAP (INFANRIX)	D2KX9	4	IM	2	M	1
884250	FLU4	INFLUENZA (SEASONAL) (FLULAVAL QUADRIVALENT)	P7HK7	2	IM	3	M	2
897056	HPV9	HPV (GARDASIL 9)	S020255	2	IM	18	F	7
902497	VARCEL	VARICELLA (VARIVAX)	t015999	UNK	SYR	3	F	12
946679	COVID19	COVID19 (COVID19 (MODERNA))	037K20A	1	IM	39	F	9
966728	FLU4	INFLUENZA (SEASONAL) (FLUZONE QUADRIVALENT)	UT7041JA	1	IM	12	F	3
966728	HPV9	HPV (GARDASIL 9)	1621926	1	IM	12	F	3
966728	MNQ	MENINGOCOCCAL CONJUGATE (MENACTRA)	U6560BA	1	IM	12	F	3
966728	TDAP	TDAP (BOOSTRIX)	9L39Z	6	IM	12	F	3
988274	COVID19	COVID19 (COVID19 (MODERNA))	011L20A	1	IM	29	F	4
1034158	COVID19	COVID19 (COVID19 (MODERNA))	010M20A	1	IM	77	M	0
1043805	DTAPIPV	DTAP + IPV (QUADRACEL)		5	SYR	4	M	70
1043805	MMRV	MEASLES + MUMPS + RUBELLA + VARICELLA (PROQUAD)		2	SYR	4	M	70
1068696	COVID19	COVID19 (COVID19 (PFIZER-BIONTECH))	EL9267	2	IM	77	M	6
1129261	COVID19	COVID19 (COVID19 (PFIZER-BIONTECH))	Unknown	2	OT		M	2
1157740	COVID19	COVID19 (COVID19 (MODERNA))		UNK		72	F	2
1164157	COVID19	COVID19 (COVID19 (PFIZER-BIONTECH))		UNK	SYR	47	M	9
1171520	COVID19	COVID19 (COVID19 (JANSSEN))	1805031	1	IM	62	M	8
1225397	MMR	MEASLES + MUMPS + RUBELLA (MMR II)		UNK		3	M	5
1239102	COVID19	COVID19 (COVID19 (JANSSEN))	041A21A	1	IM	56	F	6
1244527	COVID19	COVID19 (COVID19 (PFIZER-BIONTECH))		UNK	IM	61	M	1
1263164	COVID19	COVID19 (COVID19 (JANSSEN))	043a21a	1	IM	37	F	3
1284300	COVID19	COVID19 (COVID19 (MODERNA))	031c20a	1	SYR	34	F	3
1284300	COVID19	COVID19 (COVID19 (MODERNA))	017c21a	2	SYR	34	F	3
1326874	COVID19	COVID19 (COVID19 (MODERNA))		UNK		52	M	26
1328256	TDAP	TDAP (ADACEL)	u6737aa	1	SYR	10	F	30
1329442	COVID19	COVID19 (COVID19 (PFIZER-BIONTECH))	EW0164	2		25	F	2
1332055	FLU4	INFLUENZA (SEASONAL) (FLUARIX QUADRIVALENT)		UNK		4	F	18
1332678	COVID19	COVID19 (COVID19 (PFIZER-BIONTECH))	EW0164	1		31	M	1
1342030	COVID19	COVID19 (COVID19 (MODERNA))	041C21A	1	SYR	21	F	2
1378320	COVID19	COVID19 (COVID19 (MODERNA))		1		58	M	11
1390969	COVID19	COVID19 (COVID19 (PFIZER-BIONTECH))	EW0164	1		13	M	2
1394571	COVID19	COVID19 (COVID19 (PFIZER-BIONTECH))	EWO179	1	SYR	15	F	16
1396785	COVID19	COVID19 (COVID19 (MODERNA))	1111111	2	SYR	75	F	42
1427846	COVID19	COVID19 (COVID19 (MODERNA))	026A21A	1	IM	64	F	12
1427846	COVID19	COVID19 (COVID19 (MODERNA))	009C21A	2	IM	64	F	12
1427978	COVID19	COVID19 (COVID19 (MODERNA))		1	SYR	38	F	4
1460385	COVID19	COVID19 (COVID19 (PFIZER-BIONTECH))		2	IM	40	F	0
1465593	UNK	VACCINE NOT SPECIFIED (NO BRAND NAME)		UNK		23	M	41
1466082	COVID19	COVID19 (COVID19 (PFIZER-BIONTECH))	EW0179	2		16	M
1482898	COVID19	COVID19 (COVID19 (PFIZER-BIONTECH))	EW0176	1		16	M	7
1490307	COVID19	COVID19 (COVID19 (MODERNA))		UNK		65	F	1
1490983	COVID19	COVID19 (COVID19 (JANSSEN))	043A21A	1	IM	32	F	105
1633317	COVID19	COVID19 (COVID19 (PFIZER-BIONTECH))	FA6780	2	UN	13	M	16
1636858	COVID19	COVID19 (COVID19 (PFIZER-BIONTECH))	FA7485	UNK		15	M	1
1646281	COVID19	COVID19 (COVID19 (PFIZER-BIONTECH))		2			M
1649128	COVID19	COVID19 (COVID19 (PFIZER-BIONTECH))	EN6205	1		58	M	6
1654037	MNQ	MENINGOCOCCAL CONJUGATE (MENVEO)		UNK	IM	11	M	7
1654037	TDAP	TDAP (ADACEL)		UNK	IM	11	M	7
1661259	COVID19	COVID19 (COVID19 (PFIZER-BIONTECH))		1			M	6
1666399	COVID19	COVID19 (COVID19 (PFIZER-BIONTECH))		1	IM	13	M	2
1677448	COVID19	COVID19 (COVID19 (PFIZER-BIONTECH))		1		40	M	24
1707598	COVID19	COVID19 (COVID19 (MODERNA))		UNK	OT	42	M
1745374	COVID19	COVID19 (COVID19 (PFIZER-BIONTECH))	EW0168	1	IM	38	M	28
1745374	COVID19	COVID19 (COVID19 (PFIZER-BIONTECH))	FA7484	2	IM	38	M	28
1785762	COVID19	COVID19 (COVID19 (PFIZER-BIONTECH))		UNK		75	M	17
1804306	COVID19	COVID19 (COVID19 (JANSSEN))	1822811	1	IM	26	M	4
1818772	COVID19	COVID19 (COVID19 (JANSSEN))		1	SYR	31	F	1
1840569	COVID19	COVID19 (COVID19 (PFIZER-BIONTECH))	HRSFF8841	2	IM	13	F	2
1869347	COVID19	COVID19 (COVID19 (PFIZER-BIONTECH))	EW0198	2	IM	15	M	2
1870920	COVID19	COVID19 (COVID19 (PFIZER-BIONTECH))	FK5127	1	SYR	7	M	2
1873538	COVID19	COVID19 (COVID19 (PFIZER-BIONTECH))	Fk5127	1	SYR	11	F	4
1873622	COVID19	COVID19 (COVID19 (PFIZER-BIONTECH))	kk2157	1	UN	7	M	2
1873919	COVID19	COVID19 (COVID19 (PFIZER-BIONTECH))	FF3527	1	UN	12	M	5
1894497	COVID19	COVID19 (COVID19 (PFIZER-BIONTECH))	FK5127	1	IM	11	F	5
1901176	COVID19	COVID19 (COVID19 (PFIZER-BIONTECH))		UNK		12	M
1901937	COVID19	COVID19 (COVID19 (PFIZER-BIONTECH))	FK5127	1	IM	10	F	11
1906298	COVID19	COVID19 (COVID19 (PFIZER-BIONTECH))	FK5127	1	IM	6	F	14
1934795	COVID19	COVID19 (COVID19 (UNKNOWN))		3		21	F	1
1934795	HPV9	HPV (GARDASIL 9)	U006800	UNK		21	F	1
1943152	FLU4	INFLUENZA (SEASONAL) (FLUZONE QUADRIVALENT)	UT7633NA	UNK	IM		U
1941896	COVID19	COVID19 (COVID19 (PFIZER-BIONTECH))		1		18	F	122
1952439	COVID19	COVID19 (COVID19 (PFIZER-BIONTECH))	FK5127	1	IM	5	M	19
1971326	COVID19	COVID19 (COVID19 (PFIZER-BIONTECH))		2		7	F	6
1982123	COVID19	COVID19 (COVID19 (PFIZER-BIONTECH))	FK5618	2	IM	5	F	15
2006515	COVID19	COVID19 (COVID19 (PFIZER-BIONTECH))	FL0007	2	IM	8	M	33
2024782	COVID19	COVID19 (COVID19 (PFIZER-BIONTECH))	FF2593	1	IM	12	M	41
2024782	COVID19	COVID19 (COVID19 (PFIZER-BIONTECH))	FG3527	2	IM	12	M	41
2039850	COVID19	COVID19 (COVID19 (PFIZER-BIONTECH))	fe3594	3	IM	16	F	7
2065352	COVID19	COVID19 (COVID19 (PFIZER-BIONTECH))	FK5127	1	IM	9	M	4
2074384	COVID19	COVID19 (COVID19 (PFIZER-BIONTECH))		2			F
2083073	COVID19	COVID19 (COVID19 (PFIZER-BIONTECH))	33036BD	3	IM	12	F	22
2085597	COVID19	COVID19 (COVID19 (PFIZER-BIONTECH))		2		10	M	17
2091163	COVID19	COVID19 (COVID19 (PFIZER-BIONTECH))	EW0183	2	OT	16	F	236
2109344	COVID19	COVID19 (COVID19 (PFIZER-BIONTECH))	FL0007	2	IM	5	F	5
2161980	COVID19	COVID19 (COVID19 (PFIZER-BIONTECH))	FK5618	2	IM	5	F	6
2165406	COVID19	COVID19 (COVID19 (PFIZER-BIONTECH))	FL3209	3	IM	20	M	4
2192216	COVID19	COVID19 (COVID19 (PFIZER-BIONTECH))	59267-1055-1	1	IM	5	M	16
2206124	COVID19	COVID19 (COVID19 (PFIZER-BIONTECH))		1			F
2210991	HPV4	HPV (GARDASIL)		2		11	M	194
2213951	COVID19	COVID19 (COVID19 (PFIZER-BIONTECH))		UNK		14	M	15
2225450	COVID19	COVID19 (COVID19 (JANSSEN))	205A21A	1	IM	59	M	119
2318950	COVID19	COVID19 (COVID19 (PFIZER-BIONTECH))	FL3209	3	IM	35	F	5
2327632	COVID19	COVID19 (COVID19 (PFIZER-BIONTECH))	FL0007	2	SYR	10	F	9
2330134	COVID19	COVID19 (COVID19 (MODERNA))	022J21A	3	IM	34	M	21
2331654	COVID19	COVID19 (COVID19 (PFIZER-BIONTECH))	FC3184	3	IM	66	F	1
2363486	COVID19	COVID19 (COVID19 (PFIZER-BIONTECH))	FL8095	2	IM	5	F	2
2371741	COVID19	COVID19 (COVID19 (PFIZER-BIONTECH))	EN6200	2		69	F	0
2373834	COVID19	COVID19 (COVID19 (MODERNA))	AS1414B	1	IM	4	M	3
2400580	COVID19	COVID19 (COVID19 (PFIZER-BIONTECH))	VFCFL8094	3	SYR	5	M	0
2415246	COVID19	COVID19 (COVID19 (PFIZER-BIONTECH))	EK5730	1	IM		U
2415246	COVID19	COVID19 (COVID19 (PFIZER-BIONTECH))	EL1283	2	IM		U
2415246	COVID19	COVID19 (COVID19 (PFIZER-BIONTECH))	FJ8862	3	IM		U
2428456	COVID19	COVID19 (COVID19 (PFIZER-BIONTECH))		2			M
2470273	COVID19	COVID19 (COVID19 (PFIZER-BIONTECH))	EP7533	2	IM	36	M	9
2480545	COVID19	COVID19 (COVID19 (PFIZER-BIONTECH))	FL2757	3	IM	7	M	8
2480545	FLU4	INFLUENZA (SEASONAL) (AFLURIA QUADRIVALENT)		1	IM	7	M	8
2481168	COVID19	COVID19 (COVID19 (MODERNA))	041L20A	1	SYR	39	M	109
2481168	COVID19	COVID19 (COVID19 (MODERNA))	013M20A	2	SYR	39	M	109
2489200	COVID19	COVID19 (COVID19 (MODERNA))	AS1412B	1	IM	2	F	47
2493267	COVID19	COVID19 (COVID19 (MODERNA))	AR9236B	1	SYR	3	M	3
2504558	COVID19-2	COVID19 (COVID19 (PFIZER-BIONTECH BIVALENT))	GJ6665	5	IM	75	F	2
2523617	COVID19	COVID19 (COVID19 (MODERNA))		1	OT	24	M
2524195	FLUC4	INFLUENZA (SEASONAL) (FLUCELVAX QUADRIVALENT)	AS1595B	UNK	IM	15	M	4
2552400	COVID19-2	COVID19 (COVID19 (PFIZER-BIONTECH BIVALENT))	GK1657	3	IM	8	F	5
2576603	COVID19-2	COVID19 (COVID19 (MODERNA BIVALENT))	216K22A	3	IM	5	F	18
2579003	COVID19-2	COVID19 (COVID19 (MODERNA BIVALENT))	052D22A	3	SYR	25	F	1
2579003	FLUX	INFLUENZA (SEASONAL) (NO BRAND NAME)		UNK	SYR	25	F	1
2599482	COVID19-2	COVID19 (COVID19 (PFIZER-BIONTECH BIVALENT))	GH9694	4	IM	27	F	138
2599482	UNK	VACCINE NOT SPECIFIED (OTHER)		1	IM	27	F	138
2608421	FLU4	INFLUENZA (SEASONAL) (FLUZONE QUADRIVALENT)	ut7681ja	1	IM	6	F	0
2613948	MMRV	MEASLES + MUMPS + RUBELLA + VARICELLA (PROQUAD)		UNK	SYR	3	F	40
2637524	COVID19	COVID19 (COVID19 (MODERNA))		1	OT	67	M
2638670	COVID19	COVID19 (COVID19 (MODERNA))		1	OT	38	F
2657953	COVID19	COVID19 (COVID19 (PFIZER-BIONTECH))	F51614	2		12	F	7
2681546	RAB	RABIES (RABAVERT)	Unknown	2			F	8
2691949	PNC20	PNEUMO (PREVNAR20)	GT0538	1	IM	66	F	2
2694949	COVID19	COVID19 (COVID19 (MODERNA))		UNK	IM	7	F	1
2699921	DTAPIPV	DTAP + IPV (KINRIX)	7745R	1	IM	4	M	13
2699921	MMRV	MEASLES + MUMPS + RUBELLA + VARICELLA (PROQUAD)	X009883	1	SC	4	M	13
152738	HEP	HEP B (RECOMBIVAX HB)	99C221	UNK	IM	12	F	2
166010	MMR	MEASLES + MUMPS + RUBELLA (MMR II)		UNK	SC	6	M
166011	MMR	MEASLES + MUMPS + RUBELLA (MMR II)		UNK	SC	2	F
170678	HIBV	HIB (PEDVAXHIB)		3		1.2	M	4
170678	MMR	MEASLES + MUMPS + RUBELLA (MMR II)	2431R	UNK		1.2	M	4
173352	HEP	HEP B (RECOMBIVAX HB)	R04743	3	IM	0.9	F	5
176436	DTAP	DTAP (INFANRIX)		UNK	IM	0.25	M	14
182106	OPV	POLIO VIRUS, ORAL (NO BRAND NAME)		UNK	PO	15	M	1
182106	RAB	RABIES (NO BRAND NAME)		2	IM	15	M	1
182106	TD	TD ADSORBED (NO BRAND NAME)		UNK	IM	15	M	1
182947	HEPA	HEP A (VAQTA)		UNK	IM	15	M	7
182947	RAB	RABIES (NO BRAND NAME)		1	IM	15	M	7
182947	TYP	TYPHOID VI POLYSACCHARIDE (NO BRAND NAME)		UNK	IM	15	M	7
185310	PPV	PNEUMO (PNEUMOVAX)		UNK	IM	60	M
185528	MMR	MEASLES + MUMPS + RUBELLA (MMR II)	M8555J	UNK	IM	2.08	F	7
187290	MMR	MEASLES + MUMPS + RUBELLA (MMR II)		UNK		10	F	8
191416	HEP	HEP B (ENGERIX-B)	5117A9	UNK	IM	10	F	12
196839	PPV	PNEUMO (PNEUMOVAX)		UNK	IM	10	M	0
198915	MMR	MEASLES + MUMPS + RUBELLA (MMR II)	1023L	UNK	IM	1	F	2
211699	DTAP	DTAP (INFANRIX)	1456909	UNK	IM	4	M	2
236778	MMR	MEASLES + MUMPS + RUBELLA (MMR II)		UNK		2	F	12
244766	DTAP	DTAP (INFANRIX)	UNK	UNK		0.95	M	3
244766	HIBV	HIB (HIBERIX)	UNK	UNK		0.95	M	3
244766	IPV	POLIO VIRUS, INACT. (NO BRAND NAME)	UNK	UNK		0.95	M	3
247862	HEP	HEP B (RECOMBIVAX HB)		UNK		7	M	13
248144	FLUX	INFLUENZA (SEASONAL) (NO BRAND NAME)		UNK	UN	67	F
248144	PPV	PNEUMO (NO BRAND NAME)		UNK	UN	67	F
249320	MMR	MEASLES + MUMPS + RUBELLA (MMR II)		UNK	IM	7	M	1
249740	PPV	PNEUMO (PNEUMOVAX)		UNK	UN		M
252721	HEP	HEP B (ENGERIX-B)		UNK		14	M	10
252721	IPV	POLIO VIRUS, INACT. (NO BRAND NAME)		UNK		14	M	10
252721	TD	TD ADSORBED (NO BRAND NAME)		UNK		14	M	10
252857	DTAPH	DTAP + HIB (NO BRAND NAME)		UNK	IM	0.49	M	0
252857	IPV	POLIO VIRUS, INACT. (NO BRAND NAME)		UNK	IM	0.49	M	0
252857	PNC	PNEUMO (PREVNAR)	18121	3	IM	0.49	M	0
253811	MMR	MEASLES + MUMPS + RUBELLA (MMR II)	F1657	UNK	SC	7	M	3
262591	HEP	HEP B (ENGERIX-B)	AHBVB166BA	UNK		6	F	1
263531	DTAP	DTAP (INFANRIX)	AC14B024AA	UNK	IM	6	F	4
264581	DTAP	DTAP (INFANRIX)	AC14B024AA	UNK	IM	5	F	1
264581	MMR	MEASLES + MUMPS + RUBELLA (NO BRAND NAME)		UNK	IM	5	F	1
266273	HEPAB	HEP A + HEP B (TWINRIX)		UNK	IM	9	F	3
270399	HEPAB	HEP A + HEP B (TWINRIX)		UNK		42	M	31
271965	PPV	PNEUMO (PNEUMOVAX)		UNK		77	M	1
277355	MMR	MEASLES + MUMPS + RUBELLA (MMR II)		UNK	SC	8	F	10
278882	TD	TD ADSORBED (DITANRIX)	50202	UNK	IM	13	F	16
280388	PNC	PNEUMO (PREVNAR)		2	IM	0.25	M	0
288655	HEPAB	HEP A + HEP B (TWINRIX)		UNK	IM	4	M	50
289389	HEPAB	HEP A + HEP B (TWINRIX)		UNK	IM	16	F	2
295361	HIBV	HIB (ACTHIB)	A0267	1	IM	4	M	2
303077	TDAP	TDAP (BOOSTRIX)		UNK	UN	7	F	18
304330	HPV4	HPV (GARDASIL)	1537F	1	IM	18	F	17
307400	DTAP	DTAP (INFANRIX)	AC14B050AE	UNK	SC	5	F	6
307400	MMR	MEASLES + MUMPS + RUBELLA (PRIORIX)	A69CB002A	UNK	SC	5	F	6
309237	HPV4	HPV (GARDASIL)		1	UN	12	F	0
309511	DTAP	DTAP (INFANRIX)	A20CA363A	1	UN	0.4	M	2
309511	HIBV	HIB (HIBERIX)	A20CA363A	1	UN	0.4	M	2
309511	IPV	POLIO VIRUS, INACT. (NO BRAND NAME)	A20CA363A	1	UN	0.4	M	2
309511	PNC	PNEUMO (PREVNAR)	25646	2	UN	0.4	M	2
312609	HEPAB	HEP A + HEP B (TWINRIX)		UNK	UN		F
314781	HEPAB	HEP A + HEP B (TWINRIX)		UNK	IM	26	F	3
314781	IPV	POLIO VIRUS, INACT. (IPOL)		UNK	IM	26	F	3
314781	TD	TETANUS DIPHTHERIA (NO BRAND NAME)		UNK	IM	26	F	3
314781	YF	YELLOW FEVER (YF-VAX)		UNK	SC	26	F	3
315014	DTAP	DTAP (INFANRIX)	A20CA363A	UNK	UN	0.4	M	2
315014	HIBV	HIB (HIBERIX)	A20CA363A	UNK	UN	0.4	M	2
315014	IPV	POLIO VIRUS, INACT. (NO BRAND NAME)	A20CA363A	UNK	UN	0.4	M	2
315014	PNC	PNEUMO (PREVNAR)		UNK	UN	0.4	M	2
320707	PNC	PNEUMO (PREVNAR)		UNK	UN		M	0
324388	DTAP	DTAP (INFANRIX)	A20CA176C	1	IM	1.9	M	18
328689	HEP	HEP B (ENGERIX-B)		3	IM	5	M	4
328689	MMR	MEASLES + MUMPS + RUBELLA (MMR II)		2	SC	5	M	4
329896	DTIPV	DT + IPV (NO BRAND NAME)	W67472	UNK	IM	7	M	0
329896	MMR	MEASLES + MUMPS + RUBELLA (MMR II)	1192M	2	IM	7	M	0
338384	HPV4	HPV (GARDASIL)		1	IM	14	F	21
338402	PPV	PNEUMO (PNEUMOVAX)		UNK	IM	4	F	1
342263	HPV4	HPV (GARDASIL)	NG52730	2	IM	14	F	51
342263	TD	TD ADSORBED (DITANRIX)	XC12BM115C1	UNK	IM	14	F	51
343876	PPV	PNEUMO (PNEUMOVAX)		UNK	SC	62	M
345532	HEP	HEP B (RECOMBIVAX HB)		2	IM	6	M	9
346095	HEP	HEP B (RECOMBIVAX HB)		UNK	UN	19	F
348728	HPV4	HPV (GARDASIL)	1049U	1	IM	13	F	0
351751	DTAP	DTAP (INFANRIX)	AC14B082AD	UNK	IM	5	F	0
351751	MMR	MEASLES + MUMPS + RUBELLA (PRIORIX)	A69FB806A	UNK	SC	5	F	0
351754	DTAP	DTAP (INFANRIX)	A20CA457A	3	UN	1	M	1
351754	HIBV	HIB (HIBERIX)	A20CA457A	3	UN	1	M	1
351754	IPV	POLIO VIRUS, INACT. (NO BRAND NAME)	A20CA457A	3	UN	1	M	1
351754	PNC	PNEUMO (PREVNAR)	34468	3	UN	1	M	1
355732	HEPA	HEP A (HAVRIX)		UNK	UN		M
357013	PNC	PNEUMO (PREVNAR)	37392D1507	1	IM	3	F	4
369904	HEP	HEP B (RECOMBIVAX HB)		UNK	IM	13	F	12
369904	HPV4	HPV (GARDASIL)	NM55660	2	IM	13	F	12
371168	HPV4	HPV (GARDASIL)		1	UN		F
374774	HEP	HEP B (RECOMBIVAX HB)		UNK	IM	13	F	135
374774	HPV4	HPV (GARDASIL)		UNK	IM	13	F	135
376475	MMR	MEASLES + MUMPS + RUBELLA (MMR II)		UNK	IM	3	F	0
377704	HPV4	HPV (GARDASIL)	1050U	1	UN	14	F	31
378998	HPV2	HPV (CERVARIX)	AHPVA014C1	1	IM	10	F	5
383929	HEPAB	HEP A + HEP B (TWINRIX)		UNK	UN	24	F	1
385237	HPV4	HPV (GARDASIL)	NJ29430	UNK	IM	11	F	17
385743	RAB	RABIES (RABIPUR)	1712	3	UN	26	F	0
385822	HPV2	HPV (CERVARIX)		UNK	IM	19	F
386947	HPV4	HPV (GARDASIL)	1334X	1	UN	16	F	2
390374	PNC	PNEUMO (PREVNAR)	E12541	UNK	IM	3	F	1
392286	HEP	HEP B (NO BRAND NAME)		UNK	IM	20	F	16
392286	HEPA	HEP A (HAVRIX)		UNK	IM	20	F	16
392286	JEVX	JAPANESE ENCEPHALITIS (NO BRAND NAME)		UNK	IM	20	F	16
392286	RAB	RABIES (NO BRAND NAME)		UNK	IM	20	F	16
392918	HEP	HEP B (NO BRAND NAME)		UNK	IJ	20	F	9
392918	HEPA	HEP A (HAVRIX)		UNK	IJ	20	F	9
392918	JEVX	JAPANESE ENCEPHALITIS (NO BRAND NAME)		UNK	IJ	20	F	9
392918	RAB	RABIES (NO BRAND NAME)		UNK	IJ	20	F	9
393906	TDAP	TDAP (BOOSTRIX)		UNK	UN		U
394792	HEP	HEP B (ENGERIX-B)		1	UN	10	F	187
397298	FLU(H1N1)	INFLUENZA (H1N1) (H1N1 (MONOVALENT) (CSL))		UNK		7	F	5
397713	HEPA	HEP A (HAVRIX)		UNK	UN	12	F
401944	MMR	MEASLES + MUMPS + RUBELLA (PRIORIX)	XMJRB660A	UNK	SC	2	F	1
403178	FLU3	INFLUENZA (SEASONAL) (FLUARIX)		UNK	UN	5	F	36
407574	DTP	DTP (NO BRAND NAME)		1	UN	0.28	F	6
407574	IPV	POLIO VIRUS, INACT. (IPOL)	D0448	2	UN	0.28	F	6
411852	HEPA	HEP A (HAVRIX)	AHAVB439AA	UNK	IM	6	M	1
413411	FLU3	INFLUENZA (SEASONAL) (FLUARIX)	YFLUA537AA	UNK	IM	6	M	1
413439	DTAP	DTAP (NO BRAND NAME)		UNK	UN	8	M	0
413439	HIBV	HIB (NO BRAND NAME)		UNK	UN	8	M	0
413439	MMR	MEASLES + MUMPS + RUBELLA (MMR I)	0833Y	UNK	UN	8	M	0
416360	HPV4	HPV (GARDASIL)	NJ29430	1	IM	14	F	22
418114	FLU3	INFLUENZA (SEASONAL) (FLUARIX)	YFLUA522AA	UNK	UN	2	F
418388	HPV2	HPV (CERVARIX)		2	UN	14	F	89
425007	HEPA	HEP A (HAVRIX)	AHAVB240AI	UNK	IM	28	F	22
426541	HPV4	HPV (GARDASIL)	NK10770	2	UN		F	50
426845	FLUX(H1N1)	INFLUENZA (H1N1) (H1N1 (MONOVALENT) (UNKNOWN))		UNK	UN	9	F
427009	FLU3	INFLUENZA (SEASONAL) (FLUARIX)	YFLUA537AA	UNK	IM	9	M	6
431194	PNC	PNEUMO (PREVNAR)		1	IM	0.51	M	1
432917	DTPIPV	DTP + IPV (NO BRAND NAME)		UNK	IM	0.45	M	1
432917	PNC13	PNEUMO (PREVNAR13)		UNK	IM	0.45	M	1
435223	PNC	PNEUMO (PREVNAR)		UNK	SC	0.3	M
435641	FLUX	INFLUENZA (SEASONAL) (FOREIGN)	107502	UNK	IM	2	M	25
435972	PPV	PNEUMO (NO BRAND NAME)		UNK	UN	0.3	M	1
438239	HPV4	HPV (GARDASIL)		UNK	IM	15	F	7
442019	FLUX	INFLUENZA (SEASONAL) (NO BRAND NAME)		UNK	SYR	39	F
442848	MMR	MEASLES + MUMPS + RUBELLA (MMR II)		UNK	SC		U	0
443464	HPV4	HPV (GARDASIL)		UNK	UN		U
445253	HEP	HEP B (ENGERIX-B)	5103C6	3	SC	35	F	234
445785	HEP	HEP B (ENGERIX-B)		3	IM	15	F	31
445905	FLUX(H1N1)	INFLUENZA (H1N1) (H1N1 (MONOVALENT) (UNKNOWN))		UNK	UN	39	F
447883	PNC13	PNEUMO (PREVNAR13)	F36278	1	UN	4	F	2
450101	DTAPIPVHIB	DTAP + IPV + HIB (INFANRIX QUINTA)		UNK	UN	1.61	M	2
450101	PNC	PNEUMO (PREVNAR)	F51992	UNK	UN	1.61	M	2
450855	DTAPIPVHIB	DTAP + IPV + HIB (INFANRIX QUINTA)		UNK	UN	1.61	M	3
450855	PNC13	PNEUMO (PREVNAR13)		UNK	UN	1.61	M	3
451138	TDAP	TDAP (ADACEL)		1	UN	6	F
451928	FLU3	INFLUENZA (SEASONAL) (FLUARIX)		UNK	UN	7	F
452361	HEP	HEP B (ENGERIX-B)		1	IM	21	M
453119	HPV2	HPV (CERVARIX)		3	IM	13	F	198
454832	FLUX	INFLUENZA (SEASONAL) (FOREIGN)		UNK	SYR		M	1
454884	MMR	MEASLES + MUMPS + RUBELLA (MMR II)		2	UN	3	F
456405	TDAP	TDAP (NO BRAND NAME)		1	UN	6	F	30
456405	VARCEL	VARICELLA (VARIVAX)	1164Z	2	UN	6	F	30
456559	HPV4	HPV (GARDASIL)	0108AA	1	IM	15	F	38
461454	MNQ	MENINGOCOCCAL CONJUGATE (MENVEO)	A11025	UNK	IM	12	M	4
462510	FLUX	INFLUENZA (SEASONAL) (NO BRAND NAME)		UNK	SYR	49	F
464664	HPV2	HPV (CERVARIX)		2	UN	15	F
465227	HPV4	HPV (GARDASIL)		2	IM	18	F
466052	DTPIPV	DTP + IPV (NO BRAND NAME)	0131A	UNK	IM	0.25	F	3
466052	HIBV	HIB (ACTHIB)	69915	1	IM	0.25	F	3
466052	PNC13	PNEUMO (PREVNAR13)		UNK	UN	0.25	F	3
475754	MMR	MEASLES + MUMPS + RUBELLA (MMR II)		UNK	SC	9	M	0
477237	DTPIPV	DTP + IPV (NO BRAND NAME)		3	SYR		M
477237	HIBV	HIB (ACTHIB)		3	SYR		M
477237	PNC	PNEUMO (PREVNAR)		UNK	UN		M
479444	FLU(H1N1)	INFLUENZA (H1N1) (H1N1 (MONOVALENT) (SANOFI))	E5712	UNK	UN	32	F	11
484952	HEPA	HEP A (HAVRIX)		UNK	IM	5	F
484952	MMRV	MEASLES + MUMPS + RUBELLA + VARICELLA (NO BRAND NAME)		UNK	IM	5	F
485088	FLUN3	INFLUENZA (SEASONAL) (FLUMIST)	AF2105	UNK	IN	5	M	11
486620	DTAPIPV	DTAP + IPV (INFANRIX TETRA)	AC20B234BF	UNK	IM	5	M	0
486620	MMR	MEASLES + MUMPS + RUBELLA (PRIORIX)	A69CC859A	UNK	IM	5	M	0
486849	DTAPIPV	DTAP + IPV (INFANRIX TETRA)		UNK	IM	5	F	0
486849	MMR	MEASLES + MUMPS + RUBELLA (NO BRAND NAME)		UNK	SC	5	F	0
487280	HPV4	HPV (GARDASIL)		1	UN	14	F	15
488067	HPV4	HPV (GARDASIL)		UNK	IM	14	F	10
495682	FLUX	INFLUENZA (SEASONAL) (FOREIGN)		UNK	UN	49	F
496196	FLUX	INFLUENZA (SEASONAL) (NO BRAND NAME)		UNK	UN	49	F
497750	HEPA	HEP A (HAVRIX)		1	UN	14	M	24
497848	HPV4	HPV (GARDASIL)	H019870	UNK	IM	29	F	16
497964	MMR	MEASLES + MUMPS + RUBELLA (NO BRAND NAME)		UNK	SC	9	F	69
499438	HPV2	HPV (CERVARIX)		3	UN	15	F	1
500414	HIBV	HIB (HIBERIX)	YHIBC677GA	UNK	SYR	4	M	0
502789	IPV	POLIO VIRUS, INACT. (POLIOVAX)	J0413	1	IM	0.17	M	0
514415	HEPAB	HEP A + HEP B (NO BRAND NAME)		UNK	UN	5	M
514996	HEP	HEP B (ENGERIX-B)		1	UN	12	M	0
516358	HIBV	HIB (ACTHIB)		UNK	IM	1.6	F	0
516382	PNC13	PNEUMO (PREVNAR13)		UNK	UN	68	F	1
516985	HPV4	HPV (GARDASIL)	H022070	2	IM	18	M	6
526291	DTP	DTP (NO BRAND NAME)		6	IM	8	F	6
526291	MMR	MEASLES + MUMPS + RUBELLA (MMR II)		2	SC	8	F	6
527780	FLUX	INFLUENZA (SEASONAL) (NO BRAND NAME)		UNK		49	F
530420	MMR	MEASLES + MUMPS + RUBELLA (NO BRAND NAME)		UNK	IM	14	M	4
532105	HPVX	HPV (NO BRAND NAME)		UNK	UN	12	F
532114	HPVX	HPV (NO BRAND NAME)		UNK	UN	12	F
532370	HPVX	HPV (NO BRAND NAME)		UNK	UN	12	F
535552	MMR	MEASLES + MUMPS + RUBELLA (MMR II)	1721AA	UNK	SC	1.36	F
536095	FLUX	INFLUENZA (SEASONAL) (NO BRAND NAME)		UNK	UN		M
536569	HEPA	HEP A (VAQTA)		UNK	IM	2	F	203
537436	IPV	POLIO VIRUS, INACT. (POLIOVAX)	J0413	UNK	IM	0.17	M	0
537444	IPV	POLIO VIRUS, INACT. (POLIOVAX)	J0013	1	IM	0.18	M	0
539868	OPV	POLIO VIRUS, ORAL (NO BRAND NAME)		UNK	PO	10	M
539868	TDAP	TDAP (BOOSTRIX)		UNK	IM	10	M
539997	IPV	POLIO VIRUS, INACT. (POLIOVAX)		UNK	IM	7	M	7
545248	CEE	FSME-IMMUN. (NO BRAND NAME)		1	UN	17	M	1
545248	HEPAB	HEP A + HEP B (TWINRIX)		1	UN	17	M	1
545248	YF	YELLOW FEVER (NO BRAND NAME)		1	UN	17	M	1
550875	HEP	HEP B (ENGERIX-B)		2	UN	5	M	12
559318	HIBV	HIB (ACTHIB)		UNK	IM	5	M	0
560229	HPV4	HPV (GARDASIL)		UNK	IM	13	F	0
575209	DTAP	DTAP (NO BRAND NAME)		UNK	UN		F
575209	HIBV	HIB (ACTHIB)		UNK	UN		F
575209	PNC13	PNEUMO (PREVNAR13)		UNK	UN		F
575209	RV1	ROTAVIRUS (ROTARIX)		UNK	PO		F
575254	HEP	HEP B (ENGERIX-B)		UNK	IM	0.75	M	13
575816	IPV	POLIO VIRUS, INACT. (POLIOVAX)	K0021	UNK	IM	0.17	F	0
575891	MENB	MENINGOCOCCAL B (BEXSERO)	131301	1	IM	6	F	7
575975	HEP	HEP B (ENGERIX-B)	YHBVC391BA	2	UN	0.09	M	4
576699	HEPA	HEP A (HAVRIX)		UNK	UN	5	F
576808	FLUC3	INFLUENZA (SEASONAL) (OPTAFLU)		UNK	SYR	16	F	80
577403	PPV	PNEUMO (PNEUMOVAX)		1	SC	65	F	3
578194	HEPA	HEP A (NO BRAND NAME)		UNK	UN	29	F
578448	PPV	PNEUMO (PNEUMOVAX)	K003747	UNK	UN	5	F	0
578725	FLUX	INFLUENZA (SEASONAL) (NO BRAND NAME)		UNK			U
578725	HEP	HEP B (NO BRAND NAME)		UNK			U
578725	TYP	TYPHOID LIVE ORAL TY21A (VIVOTIF)		UNK	PO		U
581070	HIBV	HIB (ACTHIB)	KI545	1	SC	0.33	M	46
581070	PNC13	PNEUMO (PREVNAR13)	14C05A	1	SC	0.33	M	46
582187	MNQ	MENINGOCOCCAL CONJUGATE (MENVEO)		UNK	SYR	11	F
583187	MMR	MEASLES + MUMPS + RUBELLA (NO BRAND NAME)	K015765	1	IM	4	M	418
584798	DTPIPV	DTP + IPV (NO BRAND NAME)		UNK	SC	0.25	M	9
584798	HIBV	HIB (NO BRAND NAME)		UNK	SC	0.25	M	9
584798	PNC13	PNEUMO (PREVNAR13)		UNK	SC	0.25	M	9
584798	RVX	ROTAVIRUS (NO BRAND NAME)		UNK	PO	0.25	M	9
588651	HPV2	HPV (CERVARIX)		2	UN		F
588594	RV5	ROTAVIRUS (ROTATEQ)		2	PO	0.17	M	0
588633	HPV4	HPV (GARDASIL)		UNK	UN	17	F
588965	HPVX	HPV (NO BRAND NAME)		2	UN	17	F
589016	DTAPIPV	DTAP + IPV (UNKNOWN)		2	SC	0.25	M	0
589016	HIBV	HIB (ACTHIB)	K1548	2	SC	0.25	M	0
589016	PNC13	PNEUMO (PREVNAR13)		2	SC	0.25	M	0
589016	RV5	ROTAVIRUS (ROTATEQ)		2	PO	0.25	M	0
607782	HPV4	HPV (GARDASIL)		UNK	UN		U
592376	FLUN3	INFLUENZA (SEASONAL) (FLUMIST)		UNK	IN		U
613755	HEPAB	HEP A + HEP B (NO BRAND NAME)	AHABB280AP	UNK	IM	4	M	24
614233	HPV4	HPV (GARDASIL)	K006781	2	UN	14	F	19
614233	TDAP	TDAP (NO BRAND NAME)		UNK	UN	14	F	19
614696	HIBV	HIB (ACTHIB)	J11881	UNK	UN	0.8	M	1
614933	IPV	POLIO VIRUS, INACT. (NO BRAND NAME)	J00452	UNK	UN	0.2	F	1
614937	IPV	POLIO VIRUS, INACT. (IPOL)	J05161	UNK	UN	0.2	M	1
610442	DTAP	DTAP (INFANRIX)	AC14B208AA	1	IM	5	M	3
619057	MENB	MENINGOCOCCAL B (BEXSERO)		UNK	UN		M	38
614170	MENB	MENINGOCOCCAL B (BEXSERO)		UNK	IM		F	18
620641	HPV4	HPV (GARDASIL)	H007741	3	UN	13	F	99
620218	MENB	MENINGOCOCCAL B (BEXSERO)		UNK	UN	5	M
628555	HPV4	HPV (GARDASIL)	K006781	2	UN	14	F	16
628555	MEN	MENINGOCOCCAL (NO BRAND NAME)		3	UN	14	F	16
628577	HPV4	HPV (GARDASIL)	J000394	2	IM	40	F	8
630656	MENB	MENINGOCOCCAL B (BEXSERO)	140301B	UNK	IM		F	3
633594	PPV	PNEUMO (PNEUMOVAX)		UNK	UN	2	F	2
633745	PPV	PNEUMO (PNEUMOVAX)	K012824	UNK	UN	2	F	0
634080	PPV	PNEUMO (PNEUMOVAX)	K003747	UNK	UN	5	F	3
643843	HPV2	HPV (CERVARIX)		UNK	IM	11	F	53
644094	HIBV	HIB (ACTHIB)	L1298	2	UN	0.3	F	0
644094	PNC13	PNEUMO (PREVNAR13)	15F01A	2	UN	0.3	F	0
644094	RV1	ROTAVIRUS (ROTARIX)	AROLB224AA	2	PO	0.3	F	0
644391	DTAP	DTAP (INFANRIX)	A20CB283A	1	UN	0.3	M	0
644391	MENB	MENINGOCOCCAL B (BEXSERO)	152601	1	UN	0.3	M	0
644391	PNC13	PNEUMO (PREVNAR13)		1	UN	0.3	M	0
644391	RV1	ROTAVIRUS (ROTARIX)	AROLB325BA	1	UN	0.3	M	0
644473	DTPIPV	DTP + IPV (NO BRAND NAME)	A030B	1	SC	0.3	M	0
644473	HEP	HEP B (NO BRAND NAME)	9KS01R	2	SC	0.3	M	0
644473	HIBV	HIB (ACTHIB)	L1615	2	SC	0.3	M	0
644473	PNC13	PNEUMO (PREVNAR13)	15D01A	2	SC	0.3	M	0
644473	RV5	ROTAVIRUS (ROTATEQ)	L026062	2	PO	0.3	M	0
644557	HEP	HEP B (ENGERIX-B)	YHBVC394AA	UNK	UN	8	M	0
644671	HEP	HEP B (ENGERIX-B)	YHBVC390BA	UNK	UN	5	M	1
645780	HIBV	HIB (ACTHIB)	L1192	1	SC	0.2	M	1
645780	PNC13	PNEUMO (PREVNAR13)	15D01A	1	UN	0.2	M	1
649227	HPV2	HPV (CERVARIX)		UNK	IM		F
673764	HEPA	HEP A (VAQTA)		UNK	UN	15	M	92
657003	FLU3	INFLUENZA (SEASONAL) (FLUARIX)		UNK	IN	4	F	130
657672	PNC13	PNEUMO (PREVNAR13)		UNK	IM	65	F
675091	HEPAB	HEP A + HEP B (TWINRIX)		2	IM	7	F	30
675899	HEPAB	HEP A + HEP B (TWINRIX)		UNK	UN	5	M	2
676544	HIBV	HIB (HIBERIX)	A72FA594A	UNK	IM	1.25	F	27
676544	MMR	MEASLES + MUMPS + RUBELLA (MMR II)	R0540	UNK	SC	1.25	F	27
676544	PPV	PNEUMO (NO BRAND NAME)	E81958	UNK	IM	1.25	F	27
676549	HPV4	HPV (GARDASIL)		UNK	UN		F
676738	HPV4	HPV (GARDASIL)	K006781	2	UN	14	F	14
677467	MENB	MENINGOCOCCAL B (BEXSERO)	15A061	1	IM	3	F	4
672378	IPV	POLIO VIRUS, INACT. (POLIOVAX)	M74641M	1	IM		F	0
677388	MENB	MENINGOCOCCAL B (BEXSERO)		1	IM	4	F	2
677360	MENB	MENINGOCOCCAL B (BEXSERO)		UNK	IM	6	F	5
677587	MENB	MENINGOCOCCAL B (BEXSERO)	154901	1	IM	5	F	18
682068	HPV9	HPV (GARDASIL 9)	M027261	UNK	UN	10	M	10
682111	FLUN4	INFLUENZA (SEASONAL) (FLUMIST QUADRIVALENT)		UNK	IN		M	6
690160	HPV4	HPV (GARDASIL)	NH45640	UNK	UN	14	F	48
695501	HPV2	HPV (CERVARIX)	AHPVA206CF	UNK	IM		F	44
699200	MENB	MENINGOCOCCAL B (BEXSERO)		UNK	UN	6	F	1
705188	HPV4	HPV (GARDASIL)	K006781	2	IM	14	F	0
705188	TDAP	TDAP (BOOSTRIX)		UNK	UN	14	F	0
708983	PPV	PNEUMO (PNEUMOVAX)	K016373	UNK	UN	4	F	2
716153	PNC13	PNEUMO (PREVNAR13)	S15225N73146	2	SYR	0.17	M	0
718369	FLUX	INFLUENZA (SEASONAL) (NO BRAND NAME)		UNK	UN		F
718369	PPV	PNEUMO (NO BRAND NAME)		UNK	UN		F
719465	HIBV	HIB (ACTHIB)		2	IM		M
720389	FLUX	INFLUENZA (SEASONAL) (NO BRAND NAME)		UNK	UN	65	F	17
720389	PPV	PNEUMO (PNEUMOVAX)		UNK	SC	65	F	17
720618	HPV4	HPV (GARDASIL)		1	IM	12	F
726531	FLUN4	INFLUENZA (SEASONAL) (FLUENZ TETRA)		UNK	IN		M	5
727023	MENB	MENINGOCOCCAL B (BEXSERO)	153221	1	UN	5	F	17
731425	HEP	HEP B (ENGERIX-B)		UNK	UN		U
731587	HEP	HEP B (ENGERIX-B)		UNK	UN		U
731937	HPV2	HPV (CERVARIX)	AHPVA320AY	UNK	UN		F
732107	HEP	HEP B (NO BRAND NAME)		UNK	UN		U
732528	HEP	HEP B (NO BRAND NAME)		UNK	IM		U
732967	MENB	MENINGOCOCCAL B (BEXSERO)		1	SYR	3	M	2
734038	PNC13	PNEUMO (PREVNAR13)	H23100	4	IM		U	8
735817	MENB	MENINGOCOCCAL B (BEXSERO)	167801A	UNK	IM		M
736186	FLUN4	INFLUENZA (SEASONAL) (FLUENZ TETRA)		UNK	IN		F	2
736861	IPV	POLIO VIRUS, INACT. (POLIOVAX)	M746521M	UNK	UN		M	15
740008	MEN	MENINGOCOCCAL (NO BRAND NAME)		UNK	UN		M
742346	HPV4	HPV (GARDASIL)		UNK	UN		F
742946	FLUN4	INFLUENZA (SEASONAL) (FLUENZ TETRA)	Unknown	UNK	IN		F
743194	RAB	RABIES (RABIPUR)		3	UN		U
743804	DTAPIPV	DTAP + IPV (INFANRIX TETRA)	AC20B352BC	UNK	IM		F	50
743804	MMRV	MEASLES + MUMPS + RUBELLA + VARICELLA (NO BRAND NAME)	A71CB175A	2	SC		F	50
746432	HPV9	HPV (GARDASIL 9)	N024468	UNK	IM	14	F
746473	PNC13	PNEUMO (PREVNAR13)		1	IM		M	4
758084	HEP	HEP B (ENGERIX-B)	AHBVC704AQ	3	IM	6	U	0
758215	MENB	MENINGOCOCCAL B (BEXSERO)	160801	UNK	IM	2	U	0
760358	RAB	RABIES (RABIPUR)		2	IM		U
778020	FLUX	INFLUENZA (SEASONAL) (NO BRAND NAME)		1	UN	8	F	5
778020	MENB	MENINGOCOCCAL B (BEXSERO)		1	UN	8	F	5
780636	YF	YELLOW FEVER (NO BRAND NAME)		UNK	UN		M
784066	FLUA3	INFLUENZA (SEASONAL) (FLUAD)	251219A1A	UNK	IM	77	F	3
786327	HIBV	HIB (ACTHIB)	N1K28	1	SYR		F	6
786327	PNC13	PNEUMO (PREVNAR13)	L733Y7	1	SYR		F	6
787166	BCG	BCG (NO BRAND NAME)		UNK	UN	0.08	U
787166	HEP	HEP B (ENGERIX-B)		2	UN	0.08	U
792839	HPV4	HPV (GARDASIL)	N018579	UNK	IM	12	F	0
793591	PPV	PNEUMO (PNEUMOVAX)	R005759	UNK	IM	70	M	0
795137	DTAPIPVHIB	DTAP + IPV + HIB (UNKNOWN)		UNK	UN		U
796351	PNC13	PNEUMO (PREVNAR13)		1	UN		M
805240	MENB	MENINGOCOCCAL B (BEXSERO)	170501	UNK	OT		M
809085	MENB	MENINGOCOCCAL B (BEXSERO)		3		2	F
809309	HPV2	HPV (CERVARIX)	AHPVA339AC	1		25	F	0
809826	HPV9	HPV (GARDASIL 9)	R026787	1			U	2
810474	HPV9	HPV (GARDASIL 9)	R022074	UNK			F	7
811276	HEPAB	HEP A + HEP B (TWINRIX)	AHABB384AB	UNK	OT		M	329
811276	HEPAB	HEP A + HEP B (TWINRIX)	AHABB391AD	UNK	OT		M	329
811276	HEPAB	HEP A + HEP B (TWINRIX)	AHABB384AB	UNK	OT		M	329
812400	MMR	MEASLES + MUMPS + RUBELLA (NO BRAND NAME)	R019134	UNK	OT	8	F	9
818309	FLUX	INFLUENZA (SEASONAL) (NO BRAND NAME)	No batch number	UNK	OT	9	F	3
823969	FLUX	INFLUENZA (SEASONAL) (NO BRAND NAME)		UNK			F
824284	FLUX	INFLUENZA (SEASONAL) (NO BRAND NAME)		UNK	OT		F
824344	UNK	VACCINE NOT SPECIFIED (NO BRAND NAME)	No batch number	UNK	OT	49	F
826040	IPV	POLIO VIRUS, INACT. (NO BRAND NAME)	N3K711M	UNK	OT	0.17	F	0
829372	HPV4	HPV (GARDASIL)	L042771	1	OT	11	F	5
830184	PNC13	PNEUMO (PREVNAR13)	W80360W45482	UNK			U
830283	HPV9	HPV (GARDASIL 9)	S004620	1		17	F	4
830491	FLUA3	INFLUENZA (SEASONAL) (FLUAD)	251703c1a	UNK	OT		F	3
830920	HPV4	HPV (GARDASIL)		2			F
843276	RV5	ROTAVIRUS (ROTATEQ)		2	OT		F
844800	PNC	PNEUMO (PREVNAR)		UNK		75	F	0
844800	VARZOS	ZOSTER LIVE (ZOSTAVAX)		UNK		75	F	0
845373	MENB	MENINGOCOCCAL B (BEXSERO)	ABXA02BB	1		8	U	0
846777	HPV2	HPV (CERVARIX)		1		11	U	0
846815	CHOL	CHOLERA (NO BRAND NAME)	KV00232	UNK	OT		M	76
846815	HEPA	HEP A (VAQTA)	AHAVB986AM	UNK	OT		M	76
846815	TDAP	TDAP (BOOSTRIX)	AC37B320AM	UNK	OT		M	76
847384	HPV9	HPV (GARDASIL 9)	R018537	1	OT		F	3
850184	HEP	HEP B (NO BRAND NAME)		UNK	OT		M	3
850799	MMR	MEASLES + MUMPS + RUBELLA (NO BRAND NAME)		UNK		8	F
854883	DT	DT ADSORBED (NO BRAND NAME)		UNK	OT		F	0
854883	DTAP	DTAP (INFANRIX)		UNK	OT		F	0
854883	HIBV	HIB (HIBERIX)		UNK	OT		F	0
854883	IPV	POLIO VIRUS, INACT. (NO BRAND NAME)		UNK	OT		F	0
854883	MMR	MEASLES + MUMPS + RUBELLA (PRIORIX)		UNK	OT		F	0
854883	UNK	VACCINE NOT SPECIFIED (NO BRAND NAME)		UNK	OT		F	0
857898	FLUX	INFLUENZA (SEASONAL) (NO BRAND NAME)		UNK	OT		F	1
860309	HEP	HEP B (FOREIGN)	R003363	UNK	OT		M	2
860309	VARCEL	VARICELLA (VARILRIX)	A70CD341A	UNK	OT		M	2
862845	HPV9	HPV (GARDASIL 9)	S015761	UNK	OT	12	M	4
862845	TDAP	TDAP (BOOSTRIX)	AC37B335BE	UNK	OT	12	M	4
866900	FLUX	INFLUENZA (SEASONAL) (NO BRAND NAME)	AFLBA393BA	UNK	OT		U	17
867743	DTAPIPVHIB	DTAP + IPV + HIB (INFANRIX QUINTA)	A20CB386B	4	OT		M	1
867743	PNC13	PNEUMO (PREVNAR13)	12065	1	OT		M	1
867953	HPVX	HPV (NO BRAND NAME)		UNK			F
873037	PNC13	PNEUMO (PREVNAR13)		UNK			U	1
874809	DTAP	DTAP (INFANRIX)	AC14B232AN	1	OT		F	0
874809	DTAPIPV	DTAP + IPV (UNKNOWN)	AC39B109AC	1	OT		F	0
874979	DTAP	DTAP (INFANRIX)	AC14B232AN	UNK	OT		F	50
874979	DTAPIPV	DTAP + IPV (UNKNOWN)	AC39B109AC	UNK	OT		F	50
878407	HPV9	HPV (GARDASIL 9)	R022753	UNK	OT	23	F	9
878571	UNK	VACCINE NOT SPECIFIED (NO BRAND NAME)	w62464w07367	UNK	OT	0.33	M	1
878583	UNK	VACCINE NOT SPECIFIED (NO BRAND NAME)	w76285w11604	UNK	OT	0.25	M	0
878585	UNK	VACCINE NOT SPECIFIED (NO BRAND NAME)	w80361x06702	UNK	OT	0.17	M	0
878611	UNK	VACCINE NOT SPECIFIED (NO BRAND NAME)	AA0578X37663	UNK	OT	0.17	M	0
878647	HIBV	HIB (NO BRAND NAME)	201807032	UNK		0.25	M	0
878647	RV5	ROTAVIRUS (ROTATEQ)	S002168	UNK	OT	0.25	M	0
878940	IPV	POLIO VIRUS, INACT. (NO BRAND NAME)	N3N731M	UNK	OT	0.25	M	0
878977	IPV	POLIO VIRUS, INACT. (NO BRAND NAME)	P3G171M	UNK	OT	0.17	M	0
879299	HEP	HEP B (NO BRAND NAME)		UNK			M
879300	HPV2	HPV (CERVARIX)	AHPVA379AA	UNK	OT	30	F
879381	HPV2	HPV (CERVARIX)	AHPVA379AA	UNK	OT	11	F
879461	PNC13	PNEUMO (PREVNAR13)		1			M
895019	HPV9	HPV (GARDASIL 9)	S017469	UNK	OT	23	F	1
895132	HPV9	HPV (GARDASIL 9)	S024736	UNK	OT	25	F	1
895170	HPV4	HPV (GARDASIL)	S034527	UNK	OT	41	F	0
895385	HPV4	HPV (GARDASIL)	S033195	UNK	OT	29	F	2
896224	IPV	POLIO VIRUS, INACT. (NO BRAND NAME)	R3C731M	UNK	OT	0.17	M	0
896225	IPV	POLIO VIRUS, INACT. (NO BRAND NAME)	P3P091M	UNK	OT	0.17	F	0
896227	IPV	POLIO VIRUS, INACT. (NO BRAND NAME)	P3M54M	UNK	OT	4	M	4
902294	IPV	POLIO VIRUS, INACT. (POLIOVAX)	R3N141M	1	OT	0.33	M	1
920900	FLUN4	INFLUENZA (SEASONAL) (FLUENZ TETRA)		UNK	OT		M	0
942513	HPV9	HPV (GARDASIL 9)	S004620	3		26	F	460
945697	HPV9	HPV (GARDASIL 9)	T014234	UNK	OT	20	F	5
955615	PPV	PNEUMO (NO BRAND NAME)	DJ8143CR3613	UNK	OT	0.17	M	0
1112884	HPV9	HPV (GARDASIL 9)	S004620	3	OT	26	F	197
1112884	HPV9	HPV (GARDASIL 9)		2	OT	26	F	197
1114396	MENB	MENINGOCOCCAL B (BEXSERO)	UNK	UNK	IM		M	2
1114396	MENHIB	MENINGOCOCCAL CONJUGATE + HIB (MENITORIX)	UNK	UNK	IM		M	2
1114396	MMR	MEASLES + MUMPS + RUBELLA (NO BRAND NAME)	UNK	UNK	IM		M	2
1114396	PNC13	PNEUMO (PREVNAR13)	UNK	UNK	IM		M	2
1136565	MENB	MENINGOCOCCAL B (BEXSERO)		UNK	OT	1	M	2
1136565	MENHIB	MENINGOCOCCAL CONJUGATE + HIB (MENITORIX)		UNK	OT	1	M	2
1136565	MMR	MEASLES + MUMPS + RUBELLA (NO BRAND NAME)		UNK	OT	1	M	2
1136565	PNC13	PNEUMO (PREVNAR13)		UNK	OT	1	M	2
1235088	COVID19	COVID19 (COVID19 (PFIZER-BIONTECH))		1			F
1235861	COVID19	COVID19 (COVID19 (MODERNA))	300042698	1	OT	44	F	2
1235868	FLUX	INFLUENZA (SEASONAL) (NO BRAND NAME)		UNK	OT	16	M
1236475	HPV4	HPV (GARDASIL)	T025795	UNK	OT	38	F	1
1259835	FLUX	INFLUENZA (SEASONAL) (NO BRAND NAME)		UNK	OT		M
1290491	COVID19	COVID19 (COVID19 (MODERNA))	300042460	1	OT	65	F	4
1303923	COVID19	COVID19 (COVID19 (PFIZER-BIONTECH))	Unknown	1		74	F	0
1304700	COVID19	COVID19 (COVID19 (PFIZER-BIONTECH))	EP9605	2		27	F	0
1318275	COVID19	COVID19 (COVID19 (PFIZER-BIONTECH))	ER1741	2			M	13
1339427	COVID19	COVID19 (COVID19 (PFIZER-BIONTECH))	EW4811	1	OT	56	F	3
1349163	COVID19	COVID19 (COVID19 (PFIZER-BIONTECH))		2		72	F	79
1361472	COVID19	COVID19 (COVID19 (PFIZER-BIONTECH))		UNK	IM	88	F	61
1366186	COVID19	COVID19 (COVID19 (MODERNA))	30061655-28	1	OT	33	F	0
1369147	COVID19	COVID19 (COVID19 (PFIZER-BIONTECH))		1			F	3
1379742	COVID19	COVID19 (COVID19 (PFIZER-BIONTECH))	ET8885	1		38	F	0
1383972	COVID19	COVID19 (COVID19 (PFIZER-BIONTECH))	ET3674	1		46	F
1390100	COVID19	COVID19 (COVID19 (PFIZER-BIONTECH))		1			M
1401507	COVID19	COVID19 (COVID19 (PFIZER-BIONTECH))	EY3014	1		47	M	6
1403076	COVID19	COVID19 (COVID19 (PFIZER-BIONTECH))	EP2166	UNK	OT		F	2
1431884	COVID19	COVID19 (COVID19 (PFIZER-BIONTECH))		1			M	14
1441907	COVID19	COVID19 (COVID19 (PFIZER-BIONTECH))	EY0779	UNK		40	F
1444853	COVID19	COVID19 (COVID19 (PFIZER-BIONTECH))	ET6956	1	OT		M	4
1452123	COVID19	COVID19 (COVID19 (MODERNA))	3001653	1	OT	73	M	6
1454043	HEP	HEP B (ENGERIX-B)	AHBVC879AA	UNK		4	F
1455160	COVID19	COVID19 (COVID19 (PFIZER-BIONTECH))	Unknown	2			M	7
1461516	COVID19	COVID19 (COVID19 (PFIZER-BIONTECH))	Unknown	1	OT	73	M	13
1467790	DTAPIPVHIB	DTAP + IPV + HIB (UNKNOWN)		UNK		0.33	F	0
1467790	RV5	ROTAVIRUS (ROTATEQ)	T007418	UNK	OT	0.33	F	0
1469753	RV5	ROTAVIRUS (ROTATEQ)	S008977	UNK	OT	1.17	M	369
1485742	COVID19	COVID19 (COVID19 (PFIZER-BIONTECH))	EY4834	2		38	F	2
1491141	COVID19	COVID19 (COVID19 (PFIZER-BIONTECH))	EW6126	2		71	F	9
1495523	COVID19	COVID19 (COVID19 (PFIZER-BIONTECH))	FA8142	2	OT		F
1509315	COVID19	COVID19 (COVID19 (JANSSEN))		UNK			F
1527706	COVID19	COVID19 (COVID19 (PFIZER-BIONTECH))		2			M	4
1565953	HPV9	HPV (GARDASIL 9)		UNK	OT	16	F	77
1573460	HPV9	HPV (GARDASIL 9)	S040467	UNK	OT	25	F	3
1573460	UNK	VACCINE NOT SPECIFIED (NO BRAND NAME)		UNK		25	F	3
1578769	HPV4	HPV (GARDASIL)	S016467	UNK	OT	28	F	1
1578769	UNK	VACCINE NOT SPECIFIED (NO BRAND NAME)		UNK		28	F	1
1583225	HPV4	HPV (GARDASIL)	T025795	1		38	F	1
1583225	UNK	VACCINE NOT SPECIFIED (NO BRAND NAME)		UNK		38	F	1
1585188	COVID19	COVID19 (COVID19 (MODERNA))		1	OT	94	F	8
1623140	COVID19	COVID19 (COVID19 (PFIZER-BIONTECH))	Unknown	2			F	5
1625012	COVID19	COVID19 (COVID19 (PFIZER-BIONTECH))		1			M	11
1629195	COVID19	COVID19 (COVID19 (JANSSEN))		UNK			M
1633846	COVID19	COVID19 (COVID19 (PFIZER-BIONTECH))	Unknown	2	OT		F	5
1697522	COVID19	COVID19 (COVID19 (PFIZER-BIONTECH))	1D013A	2	OT		F	49
1702839	COVID19	COVID19 (COVID19 (PFIZER-BIONTECH))	FE4728	2	OT		F	9
1703773	COVID19	COVID19 (COVID19 (MODERNA))		UNK	OT	78	F
1746753	COVID19	COVID19 (COVID19 (PFIZER-BIONTECH))		1			F	9
1751416	COVID19	COVID19 (COVID19 (PFIZER-BIONTECH))	EW0207	1		72	F	0
1754932	COVID19	COVID19 (COVID19 (MODERNA))		UNK	OT	56	F	2
1755501	COVID19	COVID19 (COVID19 (PFIZER-BIONTECH))	FE7010	2			F	18
1760061	COVID19	COVID19 (COVID19 (PFIZER-BIONTECH))		2	OT		M	4
1765976	COVID19	COVID19 (COVID19 (PFIZER-BIONTECH))	FF2834	1	OT		F	3
1780274	COVID19	COVID19 (COVID19 (PFIZER-BIONTECH))	FE2707	1	OT	31	F	0
1780599	COVID19	COVID19 (COVID19 (PFIZER-BIONTECH))	FE3380	2		23	M	0
1783888	COVID19	COVID19 (COVID19 (PFIZER-BIONTECH))		2	OT		F	13
1787327	COVID19	COVID19 (COVID19 (MODERNA))		1	OT	17	M	30
1789545	COVID19	COVID19 (COVID19 (PFIZER-BIONTECH))	FA5765	2	OT		F	2
1802723	COVID19	COVID19 (COVID19 (PFIZER-BIONTECH))	EK4244	2		24	F
1806350	COVID19	COVID19 (COVID19 (PFIZER-BIONTECH))	FD9309	2	OT		M	12
1806863	COVID19	COVID19 (COVID19 (PFIZER-BIONTECH))	ELO141	1			F	10
1816505	COVID19	COVID19 (COVID19 (PFIZER-BIONTECH))	FE3380	1			M
1818859	HPV4	HPV (GARDASIL)	T016154	UNK	OT	33	F	6
1822509	COVID19	COVID19 (COVID19 (JANSSEN))		UNK			F
1825963	HEPA	HEP A (VAQTA)	T017561	UNK	OT	2	F	2
1826219	COVID19	COVID19 (COVID19 (PFIZER-BIONTECH))		2	OT		M	43
1834886	COVID19	COVID19 (COVID19 (PFIZER-BIONTECH))	FE2625	2	OT		F
1841800	COVID19	COVID19 (COVID19 (PFIZER-BIONTECH))	FC9880	2		45	F	1
1844569	COVID19	COVID19 (COVID19 (PFIZER-BIONTECH))	Unknown	2	OT	16	F	40
1844932	COVID19	COVID19 (COVID19 (PFIZER-BIONTECH))	FG4686	2	OT		M	3
1845155	COVID19	COVID19 (COVID19 (PFIZER-BIONTECH))	EW8904	1	OT	70	F	1
1856393	COVID19	COVID19 (COVID19 (PFIZER-BIONTECH))	EW0207	2		64	F	9
1856483	MENB	MENINGOCOCCAL B (BEXSERO)	ABXB25AB	UNK	IM		M	3
1859812	COVID19	COVID19 (COVID19 (PFIZER-BIONTECH))		2			M	1
1859822	COVID19	COVID19 (COVID19 (PFIZER-BIONTECH))	FD0349	2		38	M	1
1859826	COVID19	COVID19 (COVID19 (PFIZER-BIONTECH))		1		41	F
1866644	COVID19	COVID19 (COVID19 (PFIZER-BIONTECH))	FF9942	2		30	F	20
1871341	COVID19	COVID19 (COVID19 (PFIZER-BIONTECH))	FE7051	UNK	OT		F	31
1882402	HPV4	HPV (GARDASIL)	T016154	1	OT	33	F	5
1898584	COVID19	COVID19 (COVID19 (MODERNA))	3005695	1	OT	14	M	1
1901254	COVID19	COVID19 (COVID19 (MODERNA))		1	OT	59	M	1
1902786	COVID19	COVID19 (COVID19 (PFIZER-BIONTECH))		2	OT		F	70
1906971	COVID19	COVID19 (COVID19 (PFIZER-BIONTECH))		1			F	8
1910897	COVID19	COVID19 (COVID19 (PFIZER-BIONTECH))	EY3014	1			F	20
1913891	COVID19	COVID19 (COVID19 (PFIZER-BIONTECH))		UNK			M
1914157	RV5	ROTAVIRUS (ROTATEQ)		UNK	OT	0.17	M	14
1938207	COVID19	COVID19 (COVID19 (PFIZER-BIONTECH))		2			F
1940732	FLUX	INFLUENZA (SEASONAL) (NO BRAND NAME)	UT503AC	UNK	OT		F	2
1946505	COVID19	COVID19 (COVID19 (PFIZER-BIONTECH))	Unknown	1	OT		F	7
1980396	COVID19	COVID19 (COVID19 (PFIZER-BIONTECH))		2		13	F	0
2003110	HPV9	HPV (GARDASIL 9)	T035361	UNK		25	F	7
2009617	COVID19	COVID19 (COVID19 (PFIZER-BIONTECH))		2			M
2016676	COVID19	COVID19 (COVID19 (PFIZER-BIONTECH))	FD827	2	OT	15	F	1
2036531	MENB	MENINGOCOCCAL B (BEXSERO)		1	IM	4	F	2
2052120	COVID19	COVID19 (COVID19 (MODERNA))		2	OT	32	M	86
2061203	COVID19	COVID19 (COVID19 (PFIZER-BIONTECH))		2			F
2063646	UNK	VACCINE NOT SPECIFIED (NO BRAND NAME)	DNS188	2		6	M	1
2069913	COVID19	COVID19 (COVID19 (MODERNA))		1	OT	52	F	0
2073276	COVID19	COVID19 (COVID19 (PFIZER-BIONTECH))	FH8469	1	OT		M	0
2074100	COVID19	COVID19 (COVID19 (PFIZER-BIONTECH))		2			F
2084797	COVID19	COVID19 (COVID19 (MODERNA))		2	OT	47	M
2086887	COVID19	COVID19 (COVID19 (MODERNA))		1	OT	47	M
2086891	COVID19	COVID19 (COVID19 (PFIZER-BIONTECH))		UNK		42	M	5
2095074	COVID19	COVID19 (COVID19 (PFIZER-BIONTECH))	FN4072	1	OT	11	M	1
2105747	COVID19	COVID19 (COVID19 (PFIZER-BIONTECH))	FN4072	1	OT	10	M	3
2111615	COVID19	COVID19 (COVID19 (PFIZER-BIONTECH))	Unknown	2		8	F	0
2115323	HPV9	HPV (GARDASIL 9)		1	OT	12	F	10
2121592	COVID19	COVID19 (COVID19 (PFIZER-BIONTECH))	Unknown	1	OT		M	39
2124587	COVID19	COVID19 (COVID19 (PFIZER-BIONTECH))	FN4072	UNK			F	4
2140619	HPV9	HPV (GARDASIL 9)		2		25	F	61
2150341	COVID19	COVID19 (COVID19 (UNKNOWN))		2		34	F	0
2154419	COVID19	COVID19 (COVID19 (PFIZER-BIONTECH))	Unknown	UNK			M
2156114	COVID19	COVID19 (COVID19 (PFIZER-BIONTECH))	UNKNOWN	2			F
2156114	UNK	VACCINE NOT SPECIFIED (NO BRAND NAME)	Unknown	UNK			F
2157269	COVID19	COVID19 (COVID19 (MODERNA))	3006275	UNK	OT	16	M	3
2159003	COVID19	COVID19 (COVID19 (PFIZER-BIONTECH))		1	OT		M	7
2159056	COVID19	COVID19 (COVID19 (PFIZER-BIONTECH))	FC3143	2	OT	63	M	14
2164785	COVID19	COVID19 (COVID19 (MODERNA))	214001	1	OT	28	M	24
2171907	COVID19	COVID19 (COVID19 (PFIZER-BIONTECH))	FF4213	2	OT		M	75
2171963	COVID19	COVID19 (COVID19 (PFIZER-BIONTECH))	1F1009A	3	OT	76	F	2
2172018	COVID19	COVID19 (COVID19 (PFIZER-BIONTECH))	1F1009A	1	OT	76	F	12
2172564	COVID19	COVID19 (COVID19 (PFIZER-BIONTECH))		UNK			M
2181345	COVID19	COVID19 (COVID19 (PFIZER-BIONTECH))		UNK			U
2183315	COVID19	COVID19 (COVID19 (PFIZER-BIONTECH))	FJ1763	2		13	F	1
2186271	COVID19	COVID19 (COVID19 (PFIZER-BIONTECH))		1			F	1
2190691	COVID19	COVID19 (COVID19 (PFIZER-BIONTECH))		1		9	F	0
2190901	COVID19	COVID19 (COVID19 (PFIZER-BIONTECH))	Unknown	2	OT		M
2193474	COVID19	COVID19 (COVID19 (PFIZER-BIONTECH))		2			M
2193493	COVID19	COVID19 (COVID19 (PFIZER-BIONTECH))		2	OT	67	F
2195296	COVID19	COVID19 (COVID19 (PFIZER-BIONTECH))	FN4072	2	OT		M	0
2195412	COVID19	COVID19 (COVID19 (PFIZER-BIONTECH))		3		37	F	0
2195601	COVID19	COVID19 (COVID19 (PFIZER-BIONTECH))		1			M
2200081	COVID19	COVID19 (COVID19 (MODERNA))	2104025	UNK	OT	71	F
2210879	COVID19	COVID19 (COVID19 (MODERNA))	044G21ABS	UNK	OT	69	M	49
2210879	UNK	VACCINE NOT SPECIFIED (NO BRAND NAME)		UNK	OT	69	M	49
2210879	UNK	VACCINE NOT SPECIFIED (NO BRAND NAME)		UNK	OT	69	M	49
2217167	COVID19	COVID19 (COVID19 (PFIZER-BIONTECH))		1	OT		F	16
2217224	COVID19	COVID19 (COVID19 (PFIZER-BIONTECH))		1	OT		M	25
2224559	COVID19	COVID19 (COVID19 (MODERNA))		3	OT	45	M	10
2224708	COVID19	COVID19 (COVID19 (PFIZER-BIONTECH))		3			F
2229973	COVID19	COVID19 (COVID19 (PFIZER-BIONTECH))		UNK			U
2234851	COVID19	COVID19 (COVID19 (PFIZER-BIONTECH))	1F1023A	3	OT	90	M	11
2236576	COVID19	COVID19 (COVID19 (PFIZER-BIONTECH))	FN4072	2		2	M	15
2239565	COVID19	COVID19 (COVID19 (MODERNA))	000109A	UNK	OT	56	M	1
2259144	COVID19	COVID19 (COVID19 (MODERNA))		UNK	OT	58	M	31
2259429	COVID19	COVID19 (COVID19 (PFIZER-BIONTECH))		2			F
2260748	COVID19	COVID19 (COVID19 (PFIZER-BIONTECH))		2	OT		M	10
2264112	COVID19	COVID19 (COVID19 (JANSSEN))	XD985	1	OT		M	2
2269774	COVID19	COVID19 (COVID19 (PFIZER-BIONTECH))		3	OT	26	M
2286218	COVID19	COVID19 (COVID19 (PFIZER-BIONTECH))		1			F
2293285	COVID19	COVID19 (COVID19 (PFIZER-BIONTECH))		2	OT		M	0
2294914	COVID19	COVID19 (COVID19 (PFIZER-BIONTECH))		1			F
2297473	VARCEL	VARICELLA (VARIVAX)		UNK	OT	1	M	18
2298957	UNK	VACCINE NOT SPECIFIED (NO BRAND NAME)	EM2895	UNK			M	2
2302538	COVID19	COVID19 (COVID19 (PFIZER-BIONTECH))		3	OT		M	7
2308245	COVID19	COVID19 (COVID19 (PFIZER-BIONTECH))	FK6304	3	OT		F	34
2314594	COVID19	COVID19 (COVID19 (PFIZER-BIONTECH))	FN4072	1		5	M	9
2326372	COVID19	COVID19 (COVID19 (PFIZER-BIONTECH))		3	OT		M	20
2327809	RV5	ROTAVIRUS (ROTATEQ)		3	OT		U
2331303	COVID19	COVID19 (COVID19 (PFIZER-BIONTECH))	FK6302	3		71	M	4
2358976	COVID19	COVID19 (COVID19 (MODERNA))		1	OT	63	M
2364217	COVID19	COVID19 (COVID19 (MODERNA))		UNK	OT	41	M
2367234	COVID19	COVID19 (COVID19 (MODERNA))	3001946	UNK	OT		F
2368566	COVID19	COVID19 (COVID19 (MODERNA))		3	OT	72	M	0
2369380	COVID19	COVID19 (COVID19 (PFIZER-BIONTECH))	FG7387	2	OT		F	1
2394096	COVID19	COVID19 (COVID19 (PFIZER-BIONTECH))		2			F
2399835	COVID19	COVID19 (COVID19 (PFIZER-BIONTECH))		UNK			F
2399836	COVID19	COVID19 (COVID19 (PFIZER-BIONTECH))		UNK			F
2403340	HEPA	HEP A (VAQTA)	U014033	UNK		2	F	1
2406043	HPV9	HPV (GARDASIL 9)	S040467	UNK	OT	25	F	0
2417078	COVID19	COVID19 (COVID19 (PFIZER-BIONTECH))	Unknown	3	OT		M	104
2417803	COVID19	COVID19 (COVID19 (PFIZER-BIONTECH))		2			M
2418665	COVID19	COVID19 (COVID19 (PFIZER-BIONTECH))	FK0594	3	OT		F	1
2427229	COVID19	COVID19 (COVID19 (PFIZER-BIONTECH))		2			F
2429127	COVID19	COVID19 (COVID19 (MODERNA))		3	OT	26	M
2460928	HPV9	HPV (GARDASIL 9)		1		24	F
2472135	COVID19	COVID19 (COVID19 (PFIZER-BIONTECH))		2			F
2483395	COVID19	COVID19 (COVID19 (MODERNA))	000261A	3	OT	47	F	1
2488167	HEP	HEP B (NO BRAND NAME)	UNK	UNK			M
2488167	JEVX	JAPANESE ENCEPHALITIS (NO BRAND NAME)	UNK	UNK			M
2490496	COVID19	COVID19 (COVID19 (PFIZER-BIONTECH))		2			M
2497980	COVID19	COVID19 (COVID19 (PFIZER-BIONTECH))	FF0884	3	OT		F	2
2504850	COVID19	COVID19 (COVID19 (PFIZER-BIONTECH))		2			F
2507749	COVID19	COVID19 (COVID19 (PFIZER-BIONTECH))		2			M	74
2508876	COVID19	COVID19 (COVID19 (MODERNA))		UNK	OT	16	F
2515605	COVID19	COVID19 (COVID19 (PFIZER-BIONTECH))	GE3043	4			F	0
2517756	COVID19	COVID19 (COVID19 (PFIZER-BIONTECH))		1			M
2519163	COVID19	COVID19 (COVID19 (PFIZER-BIONTECH))	FN1665	UNK			F	16
2521232	DTPPVHBHPB	DTAP+IPV+HIB+HEPB (VAXELIS)		UNK	IM		M	0
2528079	FLUN4	INFLUENZA (SEASONAL) (FLUENZ TETRA)	PH2080	UNK	OT		F	2
2538116	COVID19	COVID19 (COVID19 (PFIZER-BIONTECH))	PCB0016	3	OT	67	M	0
2540460	COVID19	COVID19 (COVID19 (PFIZER-BIONTECH))	Unknown	UNK			F	14
2543473	VARZOS	ZOSTER (NO BRAND NAME)		UNK	OT	5	M	4
2543918	COVID19	COVID19 (COVID19 (PFIZER-BIONTECH))		2			M
2558871	COVID19	COVID19 (COVID19 (PFIZER-BIONTECH))	GE1643	4			F	1
2559365	HEPA	HEP A (VAQTA)		1		2	F
2565979	COVID19	COVID19 (COVID19 (PFIZER-BIONTECH))	Unknown	UNK	OT		M	1809
2568139	COVID19	COVID19 (COVID19 (PFIZER-BIONTECH))	Fn1664	2			M	57
2578770	COVID19	COVID19 (COVID19 (PFIZER-BIONTECH))		UNK	OT		M	1809
2584592	HPV9	HPV (GARDASIL 9)	U021740	1	OT		F	15
2591225	COVID19	COVID19 (COVID19 (PFIZER-BIONTECH))		2	OT	4	M	1
2594846	COVID19	COVID19 (COVID19 (PFIZER-BIONTECH))		1			F
2598493	COVID19	COVID19 (COVID19 (PFIZER-BIONTECH))		UNK	OT		F	87
2603290	COVID19	COVID19 (COVID19 (JANSSEN))	21C1905	1			M	133
2606461	RV5	ROTAVIRUS (ROTATEQ)	W004314	1	OT	0.08	M	0
2628900	COVID19	COVID19 (COVID19 (PFIZER-BIONTECH))	GH9715	3		57	M	35
2639923	HPV9	HPV (GARDASIL 9)	3023869	UNK	OT	15	M	8
2651138	MENB	MENINGOCOCCAL B (BEXSERO)	ABXC83AC	UNK	IM		M	11
2653568	COVID19	COVID19 (COVID19 (PFIZER-BIONTECH))		4	OT		M
2654823	HPV9	HPV (GARDASIL 9)	U032903	2	OT	23	F	0
2654917	FLUN4	INFLUENZA (SEASONAL) (FLUENZ TETRA)	MH2218B	2	OT		F	1
2657165	HPV9	HPV (GARDASIL 9)	U032903	1		23	F	61
2657165	HPV9	HPV (GARDASIL 9)	U032903	2	OT	23	F	61
2664022	COVID19	COVID19 (COVID19 (PFIZER-BIONTECH))		1			M	4
2664422	COVID19	COVID19 (COVID19 (PFIZER-BIONTECH))		1			M
2668377	FLUX	INFLUENZA (SEASONAL) (NO BRAND NAME)	No batch number	UNK	OT	67	M
2674762	COVID19	COVID19 (COVID19 (PFIZER-BIONTECH))	SDCH8	2		13	M	0
2678106	HPV9	HPV (GARDASIL 9)	U021740	1	OT	21	F	15
2678107	HPV9	HPV (GARDASIL 9)	W039175	1	OT	26	F	0
2679194	PNC13	PNEUMO (PREVNAR13)	EL3517EP6169	2	OT	0.25	F
2680386	RAB	RABIES (RABIPUR)	ARBBQ1ZE	UNK			M
2680386	UNK	VACCINE NOT SPECIFIED (NO BRAND NAME)	35519	UNK			M
2681863	HPV9	HPV (GARDASIL 9)	W023160	1	OT		F	18
2694387	COVID19	COVID19 (COVID19 (PFIZER-BIONTECH))		4			F
2694388	COVID19	COVID19 (COVID19 (PFIZER-BIONTECH))		2			F
2696358	PPV	PNEUMO (NO BRAND NAME)	EL8879CN1	2	OT	0.33	F	0
2696358	RVX	ROTAVIRUS (NO BRAND NAME)	W009443	UNK		0.33	F	0
2696608	HPV9	HPV (GARDASIL 9)	W023160	1	OT	16	F	18
2696915	HPV9	HPV (GARDASIL 9)	W039175	1	OT	26	F	1
[truncated: 13 more columns]

## Sheet: Kawasaki
["Kawasaki's disease"]
Vaccine code report
Vaccine name	Symptoms	Administered	Frequency
VARCEL	31	85224	36
PNC	107	28560	374
MMR	64	89659	71
DTAP	57	64108	88
HIBV	126	60151	209
IPV	44	44537	98
DTAPHEPBIP	41	12512	327
FLU3	7	97624	7
HEPA	30	44185	67
RV5	104	25071	414
HBHEPB	8	5580	143
UNK	31	33974	91
HEP	60	75476	79
DTP	11	24434	45
OPV	1	24899	4
DTAPIPVHIB	56	12427	450
RV1	80	10854	737
MEA	1	820	121
FLU(H1N1)	2	9183	21
FLUN3	2	6461	30
PNC13	160	41775	383
6VAX-F	68	5828	1166
MNQ	4	29053	13
FLUN4	3	4516	66
FLU4	14	46657	30
HPV9	1	21735	4
RVX	6	2415	248
MMRV	11	20744	53
MEN	16	5350	299
TDAP	1	45855	2
COVID19	57	1634153	3
DTAPIPV	15	13464	111
COVID19-2	3	39293	7
DTPPVHBHPB	3	884	339
PNC15	1	433	230
DTPIHI	1	263	380
DTPPHIB	1	184	543
DTAPH	3	863	347
MNC	1	120	833
BCG	5	837	597
HEPAB	3	6486	46
YF	1	4551	21
FLUX	18	34142	52
PPV	16	71426	22
DTPHEP	1	345	289
RAB	1	6081	16
PNC10	3	1135	264
JEVX	1	150	666
DTPIPV	10	707	1414
MENB	91	14094	645
MER	3	237	1265
MU	3	239	1255
JEV1	2	595	336
TYP	6	10391	57
TTOX	1	3804	26
VARZOS	3	120824	2
HPV2	1	4925	20
DF	1	275	363
DTOX	1	158	632
Vaccine name report
Vaccine name	Symptoms	Administered	Frequency
VARICELLA (VARIVAX)	21	81886	25
PNEUMO (PREVNAR)	107	28560	374
MEASLES + MUMPS + RUBELLA (MMR II)	45	78310	57
DTAP (DAPTACEL)	13	16336	79
HIB (ACTHIB)	86	22919	375
POLIO VIRUS, INACT. (POLIOVAX)	10	10104	98
DTAP + HEPB + IPV (PEDIARIX)	40	12274	325
HIB (PEDVAXHIB)	18	13654	131
DTAP (TRIPEDIA)	7	14560	48
POLIO VIRUS, INACT. (IPOL)	15	26172	57
DTAP (INFANRIX)	25	23866	104
INFLUENZA (SEASONAL) (FLUZONE)	5	36871	13
HEP A (HAVRIX)	17	24256	70
ROTAVIRUS (ROTATEQ)	104	25071	414
HIB + HEP B (COMVAX)	8	5564	143
VACCINE NOT SPECIFIED (NO BRAND NAME)	31	31019	99
DTAP (NO BRAND NAME)	10	5865	170
POLIO VIRUS, INACT. (NO BRAND NAME)	19	8261	229
HEP B (RECOMBIVAX HB)	7	28079	24
HIB (NO BRAND NAME)	16	4694	340
HEP B (NO BRAND NAME)	18	8400	214
DTP (NO BRAND NAME)	11	16294	67
POLIO VIRUS, ORAL (ORIMUNE)	1	22419	4
DTAP + IPV + HIB (PENTACEL)	20	9705	206
HEP B (FOREIGN)	5	2289	218
ROTAVIRUS (ROTARIX)	80	10854	737
MEASLES (ATTENUVAX)	1	626	159
INFLUENZA (H1N1) (H1N1 (MONOVALENT) (SANOFI))	2	5039	39
HEP A (VAQTA)	9	16725	53
INFLUENZA (SEASONAL) (FLUMIST)	2	6445	31
PNEUMO (PREVNAR13)	160	41775	383
HEP B (ENGERIX-B)	29	35400	81
DTAP+IPV+HEPB+HIB (INFANRIX HEXA)	55	4284	1283
MENINGOCOCCAL CONJUGATE (MENVEO)	2	8652	23
HIB (HIBERIX)	6	2645	226
HEP B (GENHEVAC B)	1	146	684
INFLUENZA (SEASONAL) (FLUMIST QUADRIVALENT)	1	3764	26
INFLUENZA (SEASONAL) (FLUZONE QUADRIVALENT)	3	16347	18
DTAP + IPV + HIB (NO BRAND NAME)	2	447	447
INFLUENZA (SEASONAL) (FLUARIX QUADRIVALENT)	8	11571	69
HPV (GARDASIL 9)	1	21735	4
ROTAVIRUS (NO BRAND NAME)	6	2415	248
MEASLES + MUMPS + RUBELLA + VARICELLA (PROQUAD)	8	20115	39
MENINGOCOCCAL (NO BRAND NAME)	16	3784	422
TDAP (NO BRAND NAME)	1	3117	32
COVID19 (COVID19 (PFIZER-BIONTECH))	53	965666	5
DTAP + IPV (QUADRACEL)	1	1711	58
COVID19 (COVID19 (MODERNA))	3	555712	0
COVID19 (COVID19 (JANSSEN))	1	98568	1
COVID19 (COVID19 (PFIZER-BIONTECH BIVALENT))	2	22813	8
DTAP+IPV+HIB+HEPB (VAXELIS)	3	884	339
PNEUMO (VAXNEUVANCE)	1	433	230
DTAP (ACEL-IMUNE)	2	3378	59
DT+IPV+HIB+HEPB (NO BRAND NAME)	1	263	380
DTP + IPV + ACT-HIB (NO BRAND NAME)	1	184	543
INFLUENZA (SEASONAL) (FLUARIX)	2	5940	33
DTAP + HIB (NO BRAND NAME)	2	301	664
DTAP + HIB (TRIHIBIT)	1	562	177
MENINGOCOCCAL (MENINGITEC)	1	120	833
BCG (NO BRAND NAME)	4	530	754
HEP A + HEP B (TWINRIX)	1	6293	15
YELLOW FEVER (NO BRAND NAME)	1	592	168
DTAP + IPV + HIB (INFANRIX QUINTA)	19	1417	1340
INFLUENZA (SEASONAL) (NO BRAND NAME)	18	32989	54
PNEUMO (NO BRAND NAME)	15	6819	219
DTP + HEP B (TRITANRIX)	1	101	990
MEASLES + MUMPS + RUBELLA (PRIORIX)	7	1171	597
MEASLES + MUMPS + RUBELLA (NO BRAND NAME)	12	8105	148
RABIES (RABAVERT)	1	1732	57
MEASLES + MUMPS + RUBELLA + VARICELLA (NO BRAND NAME)	3	629	476
DTAP + IPV (INFANRIX TETRA)	7	914	765
PNEUMO (SYNFLORIX)	3	1135	264
VARICELLA (NO BRAND NAME)	6	2951	203
JAPANESE ENCEPHALITIS (NO BRAND NAME)	1	150	666
DTP + IPV (NO BRAND NAME)	10	707	1414
VARICELLA (VARILRIX)	4	387	1033
MENINGOCOCCAL B (BEXSERO)	91	10508	866
DTAP+IPV+HEPB+HIB (NO BRAND NAME)	13	1462	889
DTAP + IPV (UNKNOWN)	7	1281	546
DTAP + IPV + HIB (UNKNOWN)	15	858	1748
DTAP + HEPB + IPV (INFANRIX PENTA)	1	49	2040
INFLUENZA (SEASONAL) (FLUENZ TETRA)	2	752	265
INFLUENZA (SEASONAL) (QIV DRESDEN)	3	469	639
MEASLES + RUBELLA (NO BRAND NAME)	2	55	3636
MUMPS (NO BRAND NAME)	3	73	4109
MENINGOCOCCAL CONJUGATE (MENACTRA)	2	19010	10
BCG (MYCOBAX)	1	227	440
PNEUMO (PNEUMOVAX)	1	61621	1
JAPANESE ENCEPHALITIS (IXIARO)	2	595	336
TYPHOID VI POLYSACCHARIDE (TYPHIM VI)	2	5098	39
TETANUS TOXOID (NO BRAND NAME)	1	2746	36
MEASLES + RUBELLA (MR-VAX II)	1	182	549
ZOSTER LIVE (ZOSTAVAX)	3	42792	7
HPV (CERVARIX)	1	4925	20
DENGUE TETRAVALENT (DENGVAXIA)	1	275	363
HEP A + HEP B (NO BRAND NAME)	2	193	1036
HEP A (NO BRAND NAME)	4	3204	124
TYPHOID LIVE ORAL TY21A (VIVOTIF)	3	3150	95
COVID19 (COVID19 (MODERNA BIVALENT))	1	16480	6
TYPHOID LIVE ORAL TY21A (NO BRAND NAME)	1	140	714
DIPHTHERIA TOXOIDS (NO BRAND NAME)	1	158	632
Age report:
Age	VARCEL	PNC	MMR	DTAP	HIBV	IPV	DTAPHEPBIP	FLU3	HEPA	RV5	HBHEPB	UNK	HEP	DTP	OPV	DTAPIPVHIB	RV1	MEA	FLU(H1N1)	FLUN3	PNC13	6VAX-F	MNQ	FLUN4	FLU4	HPV9	RVX	MMRV	MEN	TDAP	COVID19	DTAPIPV	COVID19-2	DTPPVHBHPB	PNC15	DTPIHI	DTPPHIB	DTAPH	MNC	BCG	HEPAB	YF	FLUX	PPV	DTPHEP	RAB	PNC10	JEVX	DTPIPV
-1	9	10	17	12	22	7	0	0	11	11	0	11	21	1	0	17	37	0	0	0	47	26	1	0	7	0	6	3	12	0	28	7	0	1	0	0	0	0	0	2	2	0	11	7	0	0	2	0	3
0	1	78	2	32	85	33	41	1	0	91	8	6	36	8	0	31	42	0	0	0	95	39	3	0	2	0	0	0	1	1	0	6	0	1	1	1	1	2	1	1	0	0	1	6	1	0	1	0	7
1	17	16	34	9	16	1	0	4	12	2	0	5	1	1	0	6	0	0	1	0	16	3	0	0	2	0	0	6	2	0	1	0	0	1	0	0	0	1	0	0	0	0	3	3	0	0	0	0	0
2	1	2	2	0	2	0	0	1	7	0	0	0	0	0	0	1	0	0	0	1	1	0	0	0	0	0	0	1	0	0	2	0	0	0	0	0	0	0	0	1	1	0	2	0	0	0	0	0	0
3	2	0	2	1	0	1	0	1	0	0	0	0	0	0	0	0	0	1	0	0	1	0	0	2	1	0	0	0	0	0	0	1	0	0	0	0	0	0	0	0	0	0	1	0	0	0	0	1	0
4	1	0	5	2	0	2	0	0	0	0	0	0	0	0	0	0	0	0	1	0	0	0	0	0	0	0	0	0	0	0	1	0	0	0	0	0	0	0	0	0	0	0	0	0	0	0	0	0	0
5	0	0	1	0	0	0	0	0	0	0	0	0	0	1	1	0	0	0	0	0	0	0	0	1	1	0	0	1	0	0	1	1	0	0	0	0	0	0	0	0	0	0	0	0	0	0	0	0	0
6	0	0	0	1	1	0	0	0	0	0	0	0	0	0	0	0	0	0	0	1	0	0	0	0	0	0	0	0	0	0	1	0	1	0	0	0	0	0	0	1	0	0	0	0	0	0	0	0	0
7	0	1	0	0	0	0	0	0	0	0	0	0	0	0	0	0	0	0	0	0	0	0	0	0	0	0	0	0	0	0	3	0	0	0	0	0	0	0	0	0	0	0	0	0	0	0	0	0	0
8	0	0	0	0	0	0	0	0	0	0	0	0	0	0	0	0	0	0	0	0	0	0	0	0	0	0	0	0	0	0	0	0	1	0	0	0	0	0	0	0	0	0	0	0	0	0	0	0	0
9	0	0	0	0	0	0	0	0	0	0	0	0	0	0	0	0	0	0	0	0	0	0	0	0	0	0	0	0	0	0	3	0	0	0	0	0	0	0	0	0	0	0	0	0	0	1	0	0	0
10	0	0	0	0	0	0	0	0	0	0	0	0	0	0	0	0	0	0	0	0	0	0	0	0	0	0	0	0	0	0	1	0	0	0	0	0	0	0	0	0	0	0	0	0	0	0	0	0	0
11	0	0	0	0	0	0	0	0	0	0	0	0	0	0	0	0	0	0	0	0	0	0	0	0	0	0	0	0	1	0	1	0	0	0	0	0	0	0	0	0	0	0	0	0	0	0	0	0	0
12	0	0	0	0	0	0	0	0	0	0	0	0	0	0	0	0	0	0	0	0	0	0	0	0	0	0	0	0	0	0	4	0	0	0	0	0	0	0	0	0	0	1	0	0	0	0	0	0	0
13	0	0	0	0	0	0	0	0	0	0	0	1	0	0	0	0	0	0	0	0	0	0	0	0	0	0	0	0	0	0	2	0	0	0	0	0	0	0	0	0	0	0	0	0	0	0	0	0	0
14	0	0	0	0	0	0	0	0	0	0	0	0	0	0	0	0	0	0	0	0	0	0	0	0	0	0	0	0	0	0	1	0	0	0	0	0	0	0	0	0	0	0	0	0	0	0	0	0	0
15	0	0	0	0	0	0	0	0	0	0	0	0	0	0	0	0	0	0	0	0	0	0	0	0	0	0	0	0	0	0	1	0	0	0	0	0	0	0	0	0	0	0	0	0	0	0	0	0	0
16	0	0	0	0	0	0	0	0	0	0	0	0	0	0	0	0	0	0	0	0	0	0	0	0	1	1	0	0	0	0	0	0	0	0	0	0	0	0	0	0	0	0	0	0	0	0	0	0	0
17	0	0	0	0	0	0	0	0	0	0	0	0	0	0	0	0	0	0	0	0	0	0	0	0	0	0	0	0	0	0	1	0	1	0	0	0	0	0	0	0	0	0	0	0	0	0	0	0	0
18	0	0	1	0	0	0	0	0	0	0	0	0	0	0	0	0	0	0	0	0	0	0	0	0	0	0	0	0	0	0	1	0	0	0	0	0	0	0	0	0	0	0	0	0	0	0	0	0	0
19	0	0	0	0	0	0	0	0	0	0	0	0	0	0	0	0	0	0	0	0	0	0	0	0	0	0	0	0	0	0	0	0	0	0	0	0	0	0	0	0	0	0	0	0	0	0	0	0	0
20	0	0	0	0	0	0	0	0	0	0	0	0	0	0	0	0	0	0	0	0	0	0	0	0	0	0	0	0	0	0	0	0	0	0	0	0	0	0	0	0	0	0	0	0	0	0	0	0	0
21	0	0	0	0	0	0	0	0	0	0	0	0	0	0	0	0	0	0	0	0	0	0	0	0	0	0	0	0	0	0	0	0	0	0	0	0	0	0	0	0	0	0	0	0	0	0	0	0	0
22	0	0	0	0	0	0	0	0	0	0	0	0	0	0	0	0	0	0	0	0	0	0	0	0	0	0	0	0	0	0	0	0	0	0	0	0	0	0	0	0	0	0	0	0	0	0	0	0	0
23	0	0	0	0	0	0	0	0	0	0	0	0	0	0	0	0	0	0	0	0	0	0	0	0	0	0	0	0	0	0	0	0	0	0	0	0	0	0	0	0	0	0	0	0	0	0	0	0	0
24	0	0	0	0	0	0	0	0	0	0	0	0	0	0	0	0	0	0	0	0	0	0	0	0	0	0	0	0	0	0	0	0	0	0	0	0	0	0	0	0	0	0	0	0	0	0	0	0	0
25	0	0	0	0	0	0	0	0	0	0	0	0	0	0	0	0	0	0	0	0	0	0	0	0	0	0	0	0	0	0	0	0	0	0	0	0	0	0	0	0	0	0	0	0	0	0	0	0	0
26	0	0	0	0	0	0	0	0	0	0	0	0	0	0	0	0	0	0	0	0	0	0	0	0	0	0	0	0	0	0	0	0	0	0	0	0	0	0	0	0	0	0	0	0	0	0	0	0	0
27	0	0	0	0	0	0	0	0	0	0	0	0	0	0	0	0	0	0	0	0	0	0	0	0	0	0	0	0	0	0	0	0	0	0	0	0	0	0	0	0	0	0	0	0	0	0	0	0	0
28	0	0	0	0	0	0	0	0	0	0	0	0	0	0	0	0	0	0	0	0	0	0	0	0	0	0	0	0	0	0	0	0	0	0	0	0	0	0	0	0	0	0	0	0	0	0	0	0	0
29	0	0	0	0	0	0	0	0	0	0	0	0	0	0	0	0	0	0	0	0	0	0	0	0	0	0	0	0	0	0	0	0	0	0	0	0	0	0	0	0	0	0	0	0	0	0	0	0	0
30	0	0	0	0	0	0	0	0	0	0	0	0	0	0	0	0	0	0	0	0	0	0	0	0	0	0	0	0	0	0	0	0	0	0	0	0	0	0	0	0	0	0	0	0	0	0	0	0	0
31	0	0	0	0	0	0	0	0	0	0	0	0	0	0	0	0	0	0	0	0	0	0	0	0	0	0	0	0	0	0	0	0	0	0	0	0	0	0	0	0	0	0	0	0	0	0	0	0	0
32	0	0	0	0	0	0	0	0	0	0	0	0	0	0	0	0	0	0	0	0	0	0	0	0	0	0	0	0	0	0	0	0	0	0	0	0	0	0	0	0	0	0	0	0	0	0	0	0	0
33	0	0	0	0	0	0	0	0	0	0	0	0	0	0	0	0	0	0	0	0	0	0	0	0	0	0	0	0	0	0	0	0	0	0	0	0	0	0	0	0	0	0	0	0	0	0	0	0	0
34	0	0	0	0	0	0	0	0	0	0	0	0	0	0	0	0	0	0	0	0	0	0	0	0	0	0	0	0	0	0	0	0	0	0	0	0	0	0	0	0	0	0	0	0	0	0	0	0	0
35	0	0	0	0	0	0	0	0	0	0	0	0	0	0	0	0	0	0	0	0	0	0	0	0	0	0	0	0	0	0	0	0	0	0	0	0	0	0	0	0	0	0	0	0	0	0	0	0	0
36	0	0	0	0	0	0	0	0	0	0	0	0	0	0	0	0	0	0	0	0	0	0	0	0	0	0	0	0	0	0	0	0	0	0	0	0	0	0	0	0	0	0	0	0	0	0	0	0	0
37	0	0	0	0	0	0	0	0	0	0	0	0	0	0	0	0	0	0	0	0	0	0	0	0	0	0	0	0	0	0	0	0	0	0	0	0	0	0	0	0	0	0	0	0	0	0	0	0	0
38	0	0	0	0	0	0	0	0	0	0	0	0	0	0	0	0	0	0	0	0	0	0	0	0	0	0	0	0	0	0	0	0	0	0	0	0	0	0	0	0	0	0	0	0	0	0	0	0	0
39	0	0	0	0	0	0	0	0	0	0	0	0	0	0	0	0	0	0	0	0	0	0	0	0	0	0	0	0	0	0	0	0	0	0	0	0	0	0	0	0	0	0	0	0	0	0	0	0	0
40	0	0	0	0	0	0	0	0	0	0	0	0	0	0	0	0	0	0	0	0	0	0	0	0	0	0	0	0	0	0	0	0	0	0	0	0	0	0	0	0	0	0	0	0	0	0	0	0	0
41	0	0	0	0	0	0	0	0	0	0	0	0	0	0	0	0	0	0	0	0	0	0	0	0	0	0	0	0	0	0	0	0	0	0	0	0	0	0	0	0	0	0	0	0	0	0	0	0	0
42	0	0	0	0	0	0	0	0	0	0	0	0	0	0	0	0	0	0	0	0	0	0	0	0	0	0	0	0	0	0	1	0	0	0	0	0	0	0	0	0	0	0	0	0	0	0	0	0	0
43	0	0	0	0	0	0	0	0	0	0	0	0	0	0	0	0	0	0	0	0	0	0	0	0	0	0	0	0	0	0	0	0	0	0	0	0	0	0	0	0	0	0	0	0	0	0	0	0	0
44	0	0	0	0	0	0	0	0	0	0	0	0	0	0	0	0	0	0	0	0	0	0	0	0	0	0	0	0	0	0	0	0	0	0	0	0	0	0	0	0	0	0	0	0	0	0	0	0	0
45	0	0	0	0	0	0	0	0	0	0	0	0	0	0	0	0	0	0	0	0	0	0	0	0	0	0	0	0	0	0	0	0	0	0	0	0	0	0	0	0	0	0	0	0	0	0	0	0	0
46	0	0	0	0	0	0	0	0	0	0	0	0	0	0	0	0	0	0	0	0	0	0	0	0	0	0	0	0	0	0	0	0	0	0	0	0	0	0	0	0	0	0	0	0	0	0	0	0	0
47	0	0	0	0	0	0	0	0	0	0	0	0	0	0	0	0	0	0	0	0	0	0	0	0	0	0	0	0	0	0	0	0	0	0	0	0	0	0	0	0	0	0	0	0	0	0	0	0	0
48	0	0	0	0	0	0	0	0	0	0	0	0	0	0	0	0	0	0	0	0	0	0	0	0	0	0	0	0	0	0	0	0	0	0	0	0	0	0	0	0	0	0	0	0	0	0	0	0	0
49	0	0	0	0	0	0	0	0	0	0	0	0	0	0	0	0	0	0	0	0	0	0	0	0	0	0	0	0	0	0	0	0	0	0	0	0	0	0	0	0	0	0	0	0	0	0	0	0	0
50	0	0	0	0	0	0	0	0	0	0	0	0	0	0	0	0	0	0	0	0	0	0	0	0	0	0	0	0	0	0	0	0	0	0	0	0	0	0	0	0	0	0	0	0	0	0	0	0	0
51	0	0	0	0	0	0	0	0	0	0	0	0	0	0	0	0	0	0	0	0	0	0	0	0	0	0	0	0	0	0	0	0	0	0	0	0	0	0	0	0	0	0	0	0	0	0	0	0	0
52	0	0	0	0	0	0	0	0	0	0	0	0	0	0	0	0	0	0	0	0	0	0	0	0	0	0	0	0	0	0	0	0	0	0	0	0	0	0	0	0	0	0	0	0	0	0	0	0	0
53	0	0	0	0	0	0	0	0	0	0	0	0	0	0	0	0	0	0	0	0	0	0	0	0	0	0	0	0	0	0	0	0	0	0	0	0	0	0	0	0	0	0	0	0	0	0	0	0	0
54	0	0	0	0	0	0	0	0	0	0	0	0	0	0	0	0	0	0	0	0	0	0	0	0	0	0	0	0	0	0	0	0	0	0	0	0	0	0	0	0	0	0	0	0	0	0	0	0	0
55	0	0	0	0	0	0	0	0	0	0	0	0	0	0	0	0	0	0	0	0	0	0	0	0	0	0	0	0	0	0	0	0	0	0	0	0	0	0	0	0	0	0	0	0	0	0	0	0	0
56	0	0	0	0	0	0	0	0	0	0	0	0	0	0	0	0	0	0	0	0	0	0	0	0	0	0	0	0	0	0	0	0	0	0	0	0	0	0	0	0	0	0	0	0	0	0	0	0	0
57	0	0	0	0	0	0	0	0	0	0	0	0	0	0	0	0	0	0	0	0	0	0	0	0	0	0	0	0	0	0	0	0	0	0	0	0	0	0	0	0	0	0	0	0	0	0	0	0	0
58	0	0	0	0	0	0	0	0	0	0	0	0	0	0	0	0	0	0	0	0	0	0	0	0	0	0	0	0	0	0	0	0	0	0	0	0	0	0	0	0	0	0	0	0	0	0	0	0	0
59	0	0	0	0	0	0	0	0	0	0	0	0	0	0	0	0	0	0	0	0	0	0	0	0	0	0	0	0	0	0	0	0	0	0	0	0	0	0	0	0	0	0	0	0	0	0	0	0	0
60	0	0	0	0	0	0	0	0	0	0	0	0	0	0	0	0	0	0	0	0	0	0	0	0	0	0	0	0	0	0	0	0	0	0	0	0	0	0	0	0	0	0	0	0	0	0	0	0	0
61	0	0	0	0	0	0	0	0	0	0	0	0	0	0	0	0	0	0	0	0	0	0	0	0	0	0	0	0	0	0	0	0	0	0	0	0	0	0	0	0	0	0	0	0	0	0	0	0	0
62	0	0	0	0	0	0	0	0	0	0	0	0	0	0	0	0	0	0	0	0	0	0	0	0	0	0	0	0	0	0	0	0	0	0	0	0	0	0	0	0	0	0	0	0	0	0	0	0	0
63	0	0	0	0	0	0	0	0	0	0	0	0	0	0	0	0	0	0	0	0	0	0	0	0	0	0	0	0	0	0	0	0	0	0	0	0	0	0	0	0	0	0	0	0	0	0	0	0	0
64	0	0	0	0	0	0	0	0	0	0	0	0	0	0	0	0	0	0	0	0	0	0	0	0	0	0	0	0	0	0	0	0	0	0	0	0	0	0	0	0	0	0	0	0	0	0	0	0	0
65	0	0	0	0	0	0	0	0	0	0	0	0	0	0	0	0	0	0	0	0	0	0	0	0	0	0	0	0	0	0	0	0	0	0	0	0	0	0	0	0	0	0	0	0	0	0	0	0	0
66	0	0	0	0	0	0	0	0	0	0	0	0	0	0	0	0	0	0	0	0	0	0	0	0	0	0	0	0	0	0	0	0	0	0	0	0	0	0	0	0	0	0	0	0	0	0	0	0	0
67	0	0	0	0	0	0	0	0	0	0	0	0	0	0	0	0	0	0	0	0	0	0	0	0	0	0	0	0	0	0	0	0	0	0	0	0	0	0	0	0	0	0	0	0	0	0	0	0	0
68	0	0	0	0	0	0	0	0	0	0	0	0	0	0	0	0	0	0	0	0	0	0	0	0	0	0	0	0	0	0	0	0	0	0	0	0	0	0	0	0	0	0	0	0	0	0	0	0	0
69	0	0	0	0	0	0	0	0	0	0	0	0	0	0	0	0	0	0	0	0	0	0	0	0	0	0	0	0	0	0	0	0	0	0	0	0	0	0	0	0	0	0	0	0	0	0	0	0	0
70	0	0	0	0	0	0	0	0	0	0	0	0	0	0	0	0	0	0	0	0	0	0	0	0	0	0	0	0	0	0	0	0	0	0	0	0	0	0	0	0	0	0	0	0	0	0	0	0	0
71	0	0	0	0	0	0	0	0	0	0	0	0	0	0	0	0	0	0	0	0	0	0	0	0	0	0	0	0	0	0	0	0	0	0	0	0	0	0	0	0	0	0	0	0	0	0	0	0	0
72	0	0	0	0	0	0	0	0	0	0	0	0	0	0	0	0	0	0	0	0	0	0	0	0	0	0	0	0	0	0	0	0	0	0	0	0	0	0	0	0	0	0	0	0	0	0	0	0	0
73	0	0	0	0	0	0	0	0	0	0	0	0	0	0	0	0	0	0	0	0	0	0	0	0	0	0	0	0	0	0	0	0	0	0	0	0	0	0	0	0	0	0	0	0	0	0	0	0	0
74	0	0	0	0	0	0	0	0	0	0	0	0	0	0	0	0	0	0	0	0	0	0	0	0	0	0	0	0	0	0	0	0	0	0	0	0	0	0	0	0	0	0	0	0	0	0	0	0	0
75	0	0	0	0	0	0	0	0	0	0	0	0	0	0	0	0	0	0	0	0	0	0	0	0	0	0	0	0	0	0	0	0	0	0	0	0	0	0	0	0	0	0	0	0	0	0	0	0	0
76	0	0	0	0	0	0	0	0	0	0	0	0	0	0	0	0	0	0	0	0	0	0	0	0	0	0	0	0	0	0	0	0	0	0	0	0	0	0	0	0	0	0	0	0	0	0	0	0	0
77	0	0	0	0	0	0	0	0	0	0	0	0	0	0	0	0	0	0	0	0	0	0	0	0	0	0	0	0	0	0	0	0	0	0	0	0	0	0	0	0	0	0	0	0	0	0	0	0	0
78	0	0	0	0	0	0	0	0	0	0	0	0	0	0	0	0	0	0	0	0	0	0	0	0	0	0	0	0	0	0	0	0	0	0	0	0	0	0	0	0	0	0	0	0	0	0	0	0	0
79	0	0	0	0	0	0	0	0	0	0	0	0	0	0	0	0	0	0	0	0	0	0	0	0	0	0	0	0	0	0	0	0	0	0	0	0	0	0	0	0	0	0	0	0	0	0	0	0	0
80	0	0	0	0	0	0	0	0	0	0	0	0	0	0	0	0	0	0	0	0	0	0	0	0	0	0	0	0	0	0	0	0	0	0	0	0	0	0	0	0	0	0	0	0	0	0	0	0	0
81	0	0	0	0	0	0	0	0	0	0	0	0	0	0	0	0	0	0	0	0	0	0	0	0	0	0	0	0	0	0	0	0	0	0	0	0	0	0	0	0	0	0	0	0	0	0	0	0	0
82	0	0	0	0	0	0	0	0	0	0	0	0	0	0	0	0	0	0	0	0	0	0	0	0	0	0	0	0	0	0	0	0	0	0	0	0	0	0	0	0	0	0	0	0	0	0	0	0	0
83	0	0	0	0	0	0	0	0	0	0	0	0	0	0	0	0	0	0	0	0	0	0	0	0	0	0	0	0	0	0	0	0	0	0	0	0	0	0	0	0	0	0	0	0	0	0	0	0	0
84	0	0	0	0	0	0	0	0	0	0	0	0	0	0	0	0	0	0	0	0	0	0	0	0	0	0	0	0	0	0	0	0	0	0	0	0	0	0	0	0	0	0	0	0	0	0	0	0	0
85	0	0	0	0	0	0	0	0	0	0	0	0	0	0	0	0	0	0	0	0	0	0	0	0	0	0	0	0	0	0	0	0	0	0	0	0	0	0	0	0	0	0	0	0	0	0	0	0	0
86	0	0	0	0	0	0	0	0	0	0	0	0	0	0	0	0	0	0	0	0	0	0	0	0	0	0	0	0	0	0	0	0	0	0	0	0	0	0	0	0	0	0	0	0	0	0	0	0	0
87	0	0	0	0	0	0	0	0	0	0	0	0	0	0	0	0	0	0	0	0	0	0	0	0	0	0	0	0	0	0	0	0	0	0	0	0	0	0	0	0	0	0	0	0	0	0	0	0	0
88	0	0	0	0	0	0	0	0	0	0	0	0	0	0	0	0	0	0	0	0	0	0	0	0	0	0	0	0	0	0	0	0	0	0	0	0	0	0	0	0	0	0	0	0	0	0	0	0	0
89	0	0	0	0	0	0	0	0	0	0	0	0	0	0	0	0	0	0	0	0	0	0	0	0	0	0	0	0	0	0	0	0	0	0	0	0	0	0	0	0	0	0	0	0	0	0	0	0	0
90	0	0	0	0	0	0	0	0	0	0	0	0	0	0	0	0	0	0	0	0	0	0	0	0	0	0	0	0	0	0	0	0	0	0	0	0	0	0	0	0	0	0	0	0	0	0	0	0	0
91	0	0	0	0	0	0	0	0	0	0	0	0	0	0	0	0	0	0	0	0	0	0	0	0	0	0	0	0	0	0	0	0	0	0	0	0	0	0	0	0	0	0	0	0	0	0	0	0	0
92	0	0	0	0	0	0	0	0	0	0	0	0	0	0	0	0	0	0	0	0	0	0	0	0	0	0	0	0	0	0	0	0	0	0	0	0	0	0	0	0	0	0	0	0	0	0	0	0	0
93	0	0	0	0	0	0	0	0	0	0	0	0	0	0	0	0	0	0	0	0	0	0	0	0	0	0	0	0	0	0	0	0	0	0	0	0	0	0	0	0	0	0	0	0	0	0	0	0	0
94	0	0	0	0	0	0	0	0	0	0	0	0	0	0	0	0	0	0	0	0	0	0	0	0	0	0	0	0	0	0	0	0	0	0	0	0	0	0	0	0	0	0	0	0	0	0	0	0	0
95	0	0	0	0	0	0	0	0	0	0	0	0	0	0	0	0	0	0	0	0	0	0	0	0	0	0	0	0	0	0	0	0	0	0	0	0	0	0	0	0	0	0	0	0	0	0	0	0	0
96	0	0	0	0	0	0	0	0	0	0	0	0	0	0	0	0	0	0	0	0	0	0	0	0	0	0	0	0	0	0	0	0	0	0	0	0	0	0	0	0	0	0	0	0	0	0	0	0	0
97	0	0	0	0	0	0	0	0	0	0	0	0	0	0	0	0	0	0	0	0	0	0	0	0	0	0	0	0	0	0	0	0	0	0	0	0	0	0	0	0	0	0	0	0	0	0	0	0	0
98	0	0	0	0	0	0	0	0	0	0	0	0	0	0	0	0	0	0	0	0	0	0	0	0	0	0	0	0	0	0	0	0	0	0	0	0	0	0	0	0	0	0	0	0	0	0	0	0	0
99	0	0	0	0	0	0	0	0	0	0	0	0	0	0	0	0	0	0	0	0	0	0	0	0	0	0	0	0	0	0	0	0	0	0	0	0	0	0	0	0	0	0	0	0	0	0	0	0	0
100	0	0	0	0	0	0	0	0	0	0	0	0	0	0	0	0	0	0	0	0	0	0	0	0	0	0	0	0	0	0	0	0	0	0	0	0	0	0	0	0	0	0	0	0	0	0	0	0	0
101	0	0	0	0	0	0	0	0	0	0	0	0	0	0	0	0	0	0	0	0	0	0	0	0	0	0	0	0	0	0	0	0	0	0	0	0	0	0	0	0	0	0	0	0	0	0	0	0	0
102	0	0	0	0	0	0	0	0	0	0	0	0	0	0	0	0	0	0	0	0	0	0	0	0	0	0	0	0	0	0	0	0	0	0	0	0	0	0	0	0	0	0	0	0	0	0	0	0	0
103	0	0	0	0	0	0	0	0	0	0	0	0	0	0	0	0	0	0	0	0	0	0	0	0	0	0	0	0	0	0	0	0	0	0	0	0	0	0	0	0	0	0	0	0	0	0	0	0	0
104	0	0	0	0	0	0	0	0	0	0	0	0	0	0	0	0	0	0	0	0	0	0	0	0	0	0	0	0	0	0	0	0	0	0	0	0	0	0	0	0	0	0	0	0	0	0	0	0	0
105	0	0	0	0	0	0	0	0	0	0	0	0	0	0	0	0	0	0	0	0	0	0	0	0	0	0	0	0	0	0	0	0	0	0	0	0	0	0	0	0	0	0	0	0	0	0	0	0	0
106	0	0	0	0	0	0	0	0	0	0	0	0	0	0	0	0	0	0	0	0	0	0	0	0	0	0	0	0	0	0	0	0	0	0	0	0	0	0	0	0	0	0	0	0	0	0	0	0	0
107	0	0	0	0	0	0	0	0	0	0	0	0	0	0	0	0	0	0	0	0	0	0	0	0	0	0	0	0	0	0	0	0	0	0	0	0	0	0	0	0	0	0	0	0	0	0	0	0	0
108	0	0	0	0	0	0	0	0	0	0	0	0	0	0	0	0	0	0	0	0	0	0	0	0	0	0	0	0	0	0	0	0	0	0	0	0	0	0	0	0	0	0	0	0	0	0	0	0	0
109	0	0	0	0	0	0	0	0	0	0	0	0	0	0	0	0	0	0	0	0	0	0	0	0	0	0	0	0	0	0	0	0	0	0	0	0	0	0	0	0	0	0	0	0	0	0	0	0	0
110	0	0	0	0	0	0	0	0	0	0	0	0	0	0	0	0	0	0	0	0	0	0	0	0	0	0	0	0	0	0	0	0	0	0	0	0	0	0	0	0	0	0	0	0	0	0	0	0	0
111	0	0	0	0	0	0	0	0	0	0	0	0	0	0	0	0	0	0	0	0	0	0	0	0	0	0	0	0	0	0	0	0	0	0	0	0	0	0	0	0	0	0	0	0	0	0	0	0	0
112	0	0	0	0	0	0	0	0	0	0	0	0	0	0	0	0	0	0	0	0	0	0	0	0	0	0	0	0	0	0	0	0	0	0	0	0	0	0	0	0	0	0	0	0	0	0	0	0	0
113	0	0	0	0	0	0	0	0	0	0	0	0	0	0	0	0	0	0	0	0	0	0	0	0	0	0	0	0	0	0	0	0	0	0	0	0	0	0	0	0	0	0	0	0	0	0	0	0	0
114	0	0	0	0	0	0	0	0	0	0	0	0	0	0	0	0	0	0	0	0	0	0	0	0	0	0	0	0	0	0	0	0	0	0	0	0	0	0	0	0	0	0	0	0	0	0	0	0	0
115	0	0	0	0	0	0	0	0	0	0	0	0	0	0	0	0	0	0	0	0	0	0	0	0	0	0	0	0	0	0	0	0	0	0	0	0	0	0	0	0	0	0	0	0	0	0	0	0	0
116	0	0	0	0	0	0	0	0	0	0	0	0	0	0	0	0	0	0	0	0	0	0	0	0	0	0	0	0	0	0	0	0	0	0	0	0	0	0	0	0	0	0	0	0	0	0	0	0	0
117	0	0	0	0	0	0	0	0	0	0	0	0	0	0	0	0	0	0	0	0	0	0	0	0	0	0	0	0	0	0	0	0	0	0	0	0	0	0	0	0	0	0	0	0	0	0	0	0	0
118	0	0	0	0	0	0	0	0	0	0	0	0	0	0	0	0	0	0	0	0	0	0	0	0	0	0	0	0	0	0	0	0	0	0	0	0	0	0	0	0	0	0	0	0	0	0	0	0	0
119	0	0	0	0	0	0	0	0	0	0	0	0	0	0	0	0	0	0	0	0	0	0	0	0	0	0	0	0	0	0	0	0	0	0	0	0	0	0	0	0	0	0	0	0	0	0	0	0	0
120	0	0	0	0	0	0	0	0	0	0	0	0	0	0	0	0	0	0	0	0	0	0	0	0	0	0	0	0	0	0	0	0	0	0	0	0	0	0	0	0	0	0	0	0	0	0	0	0	0
Age report: count|total|freq/100K
Age	VARCEL	PNC	MMR	DTAP	HIBV	IPV	DTAPHEPBIP	FLU3	HEPA	RV5	HBHEPB	UNK	HEP	DTP	OPV	DTAPIPVHIB	RV1	MEA	FLU(H1N1)	FLUN3	PNC13	6VAX-F	MNQ	FLUN4	FLU4	HPV9	RVX	MMRV	MEN	TDAP	COVID19	DTAPIPV	COVID19-2	DTPPVHBHPB	PNC15	DTPIHI	DTPPHIB	DTAPH	MNC	BCG	HEPAB	YF	FLUX	PPV	DTPHEP	RAB	PNC10	JEVX	DTPIPV
-1	9|16090|55	10|1693|590	17|11940|142	12|3362|356	22|6212|354	7|2473|283	0|0|0	0|0|0	11|6815|161	11|8093|135	0|0|0	11|8220|133	21|16277|129	1|1794|55	0|0|0	17|1397|1216	37|2769|1336	0|0|0	0|0|0	0|0|0	47|7003|671	26|1643|1582	1|2601|38	0|0|0	7|3610|193	0|0|0	6|891|673	3|6945|43	12|1142|1050	0|0|0	28|477193|5	7|1535|456	0|0|0	1|450|222	0|0|0	0|0|0	0|0|0	0|0|0	0|0|0	2|399|501	2|1364|146	0|0|0	11|11019|99	7|13840|50	0|0|0	0|0|0	2|417|479	0|0|0	3|137|2189
0	1|777|128	78|15682|497	2|978|204	32|14495|220	85|31979|265	33|13315|247	41|9552|429	1|1860|53	0|0|0	91|16540|550	8|3017|265	6|1356|442	36|14617|246	8|13133|60	0|0|0	31|8134|381	42|7721|543	0|0|0	0|0|0	0|0|0	95|14578|651	39|3666|1063	3|311|964	0|0|0	2|1046|191	0|0|0	0|0|0	0|0|0	1|586|170	1|219|456	0|0|0	6|1260|476	0|0|0	1|319|313	1|120|833	1|137|729	1|122|819	2|268|746	1|45|2222	1|199|502	0|0|0	0|0|0	1|452|221	6|2058|291	1|285|350	0|0|0	1|572|174	0|0|0	7|352|1988
1	17|25025|67	16|8068|198	34|30890|110	9|13938|64	16|17022|93	1|4398|22	0|0|0	4|3164|126	12|9714|123	2|257|778	0|0|0	5|688|726	1|2884|34	1|4351|22	0|0|0	6|1922|312	0|0|0	0|0|0	1|421|237	0|0|0	16|6421|249	3|344|872	0|0|0	0|0|0	2|1353|147	0|0|0	0|0|0	6|3852|155	2|521|383	0|0|0	1|851|117	0|0|0	0|0|0	1|51|1960	0|0|0	0|0|0	0|0|0	1|415|240	0|0|0	0|0|0	0|0|0	0|0|0	3|733|409	3|871|344	0|0|0	0|0|0	0|0|0	0|0|0	0|0|0
2	1|2606|38	2|1023|195	2|2208|90	0|0|0	2|1858|107	0|0|0	0|0|0	1|1016|98	7|2306|303	0|0|0	0|0|0	0|0|0	0|0|0	0|0|0	0|0|0	1|270|370	0|0|0	0|0|0	0|0|0	1|360|277	1|844|118	0|0|0	0|0|0	0|0|0	0|0|0	0|0|0	0|0|0	1|273|366	0|0|0	0|0|0	2|826|242	0|0|0	0|0|0	0|0|0	0|0|0	0|0|0	0|0|0	0|0|0	0|0|0	1|8|12500	1|29|3448	0|0|0	2|265|754	0|0|0	0|0|0	0|0|0	0|0|0	0|0|0	0|0|0
3	2|2125|94	0|0|0	2|1428|140	1|1559|64	0|0|0	1|610|163	0|0|0	1|1028|97	0|0|0	0|0|0	0|0|0	0|0|0	0|0|0	0|0|0	0|0|0	0|0|0	0|0|0	1|4|25000	0|0|0	0|0|0	1|707|141	0|0|0	0|0|0	2|255|784	1|622|160	0|0|0	0|0|0	0|0|0	0|0|0	0|0|0	0|0|0	1|340|294	0|0|0	0|0|0	0|0|0	0|0|0	0|0|0	0|0|0	0|0|0	0|0|0	0|0|0	0|0|0	1|271|369	0|0|0	0|0|0	0|0|0	0|0|0	1|11|9090	0|0|0
4	1|7828|12	0|0|0	5|14037|35	2|13054|15	0|0|0	2|10572|18	0|0|0	0|0|0	0|0|0	0|0|0	0|0|0	0|0|0	0|0|0	0|0|0	0|0|0	0|0|0	0|0|0	0|0|0	1|193|518	0|0|0	0|0|0	0|0|0	0|0|0	0|0|0	0|0|0	0|0|0	0|0|0	0|0|0	0|0|0	0|0|0	1|1071|93	0|0|0	0|0|0	0|0|0	0|0|0	0|0|0	0|0|0	0|0|0	0|0|0	0|0|0	0|0|0	0|0|0	0|0|0	0|0|0	0|0|0	0|0|0	0|0|0	0|0|0	0|0|0
5	0|0|0	0|0|0	1|9507|10	0|0|0	0|0|0	0|0|0	0|0|0	0|0|0	0|0|0	0|0|0	0|0|0	0|0|0	0|0|0	1|1724|58	1|2448|40	0|0|0	0|0|0	0|0|0	0|0|0	0|0|0	0|0|0	0|0|0	0|0|0	1|248|403	1|663|150	0|0|0	0|0|0	1|2021|49	0|0|0	0|0|0	1|2751|36	1|2437|41	0|0|0	0|0|0	0|0|0	0|0|0	0|0|0	0|0|0	0|0|0	0|0|0	0|0|0	0|0|0	0|0|0	0|0|0	0|0|0	0|0|0	0|0|0	0|0|0	0|0|0
6	0|0|0	0|0|0	0|0|0	1|1379|72	1|93|1075	0|0|0	0|0|0	0|0|0	0|0|0	0|0|0	0|0|0	0|0|0	0|0|0	0|0|0	0|0|0	0|0|0	0|0|0	0|0|0	0|0|0	1|301|332	0|0|0	0|0|0	0|0|0	0|0|0	0|0|0	0|0|0	0|0|0	0|0|0	0|0|0	0|0|0	1|1921|52	0|0|0	1|219|456	0|0|0	0|0|0	0|0|0	0|0|0	0|0|0	0|0|0	1|1|100000	0|0|0	0|0|0	0|0|0	0|0|0	0|0|0	0|0|0	0|0|0	0|0|0	0|0|0
7	0|0|0	1|73|1369	0|0|0	0|0|0	0|0|0	0|0|0	0|0|0	0|0|0	0|0|0	0|0|0	0|0|0	0|0|0	0|0|0	0|0|0	0|0|0	0|0|0	0|0|0	0|0|0	0|0|0	0|0|0	0|0|0	0|0|0	0|0|0	0|0|0	0|0|0	0|0|0	0|0|0	0|0|0	0|0|0	0|0|0	3|2117|141	0|0|0	0|0|0	0|0|0	0|0|0	0|0|0	0|0|0	0|0|0	0|0|0	0|0|0	0|0|0	0|0|0	0|0|0	0|0|0	0|0|0	0|0|0	0|0|0	0|0|0	0|0|0
8	0|0|0	0|0|0	0|0|0	0|0|0	0|0|0	0|0|0	0|0|0	0|0|0	0|0|0	0|0|0	0|0|0	0|0|0	0|0|0	0|0|0	0|0|0	0|0|0	0|0|0	0|0|0	0|0|0	0|0|0	0|0|0	0|0|0	0|0|0	0|0|0	0|0|0	0|0|0	0|0|0	0|0|0	0|0|0	0|0|0	0|0|0	0|0|0	1|260|384	0|0|0	0|0|0	0|0|0	0|0|0	0|0|0	0|0|0	0|0|0	0|0|0	0|0|0	0|0|0	0|0|0	0|0|0	0|0|0	0|0|0	0|0|0	0|0|0
9	0|0|0	0|0|0	0|0|0	0|0|0	0|0|0	0|0|0	0|0|0	0|0|0	0|0|0	0|0|0	0|0|0	0|0|0	0|0|0	0|0|0	0|0|0	0|0|0	0|0|0	0|0|0	0|0|0	0|0|0	0|0|0	0|0|0	0|0|0	0|0|0	0|0|0	0|0|0	0|0|0	0|0|0	0|0|0	0|0|0	3|2417|124	0|0|0	0|0|0	0|0|0	0|0|0	0|0|0	0|0|0	0|0|0	0|0|0	0|0|0	0|0|0	0|0|0	0|0|0	0|0|0	0|0|0	1|42|2380	0|0|0	0|0|0	0|0|0
10	0|0|0	0|0|0	0|0|0	0|0|0	0|0|0	0|0|0	0|0|0	0|0|0	0|0|0	0|0|0	0|0|0	0|0|0	0|0|0	0|0|0	0|0|0	0|0|0	0|0|0	0|0|0	0|0|0	0|0|0	0|0|0	0|0|0	0|0|0	0|0|0	0|0|0	0|0|0	0|0|0	0|0|0	0|0|0	0|0|0	1|2687|37	0|0|0	0|0|0	0|0|0	0|0|0	0|0|0	0|0|0	0|0|0	0|0|0	0|0|0	0|0|0	0|0|0	0|0|0	0|0|0	0|0|0	0|0|0	0|0|0	0|0|0	0|0|0
11	0|0|0	0|0|0	0|0|0	0|0|0	0|0|0	0|0|0	0|0|0	0|0|0	0|0|0	0|0|0	0|0|0	0|0|0	0|0|0	0|0|0	0|0|0	0|0|0	0|0|0	0|0|0	0|0|0	0|0|0	0|0|0	0|0|0	0|0|0	0|0|0	0|0|0	0|0|0	0|0|0	0|0|0	1|363|275	0|0|0	1|3950|25	0|0|0	0|0|0	0|0|0	0|0|0	0|0|0	0|0|0	0|0|0	0|0|0	0|0|0	0|0|0	0|0|0	0|0|0	0|0|0	0|0|0	0|0|0	0|0|0	0|0|0	0|0|0
12	0|0|0	0|0|0	0|0|0	0|0|0	0|0|0	0|0|0	0|0|0	0|0|0	0|0|0	0|0|0	0|0|0	0|0|0	0|0|0	0|0|0	0|0|0	0|0|0	0|0|0	0|0|0	0|0|0	0|0|0	0|0|0	0|0|0	0|0|0	0|0|0	0|0|0	0|0|0	0|0|0	0|0|0	0|0|0	0|0|0	4|6136|65	0|0|0	0|0|0	0|0|0	0|0|0	0|0|0	0|0|0	0|0|0	0|0|0	0|0|0	0|0|0	1|17|5882	0|0|0	0|0|0	0|0|0	0|0|0	0|0|0	0|0|0	0|0|0
13	0|0|0	0|0|0	0|0|0	0|0|0	0|0|0	0|0|0	0|0|0	0|0|0	0|0|0	0|0|0	0|0|0	1|127|787	0|0|0	0|0|0	0|0|0	0|0|0	0|0|0	0|0|0	0|0|0	0|0|0	0|0|0	0|0|0	0|0|0	0|0|0	0|0|0	0|0|0	0|0|0	0|0|0	0|0|0	0|0|0	2|4862|41	0|0|0	0|0|0	0|0|0	0|0|0	0|0|0	0|0|0	0|0|0	0|0|0	0|0|0	0|0|0	0|0|0	0|0|0	0|0|0	0|0|0	0|0|0	0|0|0	0|0|0	0|0|0
14	0|0|0	0|0|0	0|0|0	0|0|0	0|0|0	0|0|0	0|0|0	0|0|0	0|0|0	0|0|0	0|0|0	0|0|0	0|0|0	0|0|0	0|0|0	0|0|0	0|0|0	0|0|0	0|0|0	0|0|0	0|0|0	0|0|0	0|0|0	0|0|0	0|0|0	0|0|0	0|0|0	0|0|0	0|0|0	0|0|0	1|5306|18	0|0|0	0|0|0	0|0|0	0|0|0	0|0|0	0|0|0	0|0|0	0|0|0	0|0|0	0|0|0	0|0|0	0|0|0	0|0|0	0|0|0	0|0|0	0|0|0	0|0|0	0|0|0
15	0|0|0	0|0|0	0|0|0	0|0|0	0|0|0	0|0|0	0|0|0	0|0|0	0|0|0	0|0|0	0|0|0	0|0|0	0|0|0	0|0|0	0|0|0	0|0|0	0|0|0	0|0|0	0|0|0	0|0|0	0|0|0	0|0|0	0|0|0	0|0|0	0|0|0	0|0|0	0|0|0	0|0|0	0|0|0	0|0|0	1|6410|15	0|0|0	0|0|0	0|0|0	0|0|0	0|0|0	0|0|0	0|0|0	0|0|0	0|0|0	0|0|0	0|0|0	0|0|0	0|0|0	0|0|0	0|0|0	0|0|0	0|0|0	0|0|0
16	0|0|0	0|0|0	0|0|0	0|0|0	0|0|0	0|0|0	0|0|0	0|0|0	0|0|0	0|0|0	0|0|0	0|0|0	0|0|0	0|0|0	0|0|0	0|0|0	0|0|0	0|0|0	0|0|0	0|0|0	0|0|0	0|0|0	0|0|0	0|0|0	1|506|197	1|901|110	0|0|0	0|0|0	0|0|0	0|0|0	0|0|0	0|0|0	0|0|0	0|0|0	0|0|0	0|0|0	0|0|0	0|0|0	0|0|0	0|0|0	0|0|0	0|0|0	0|0|0	0|0|0	0|0|0	0|0|0	0|0|0	0|0|0	0|0|0
17	0|0|0	0|0|0	0|0|0	0|0|0	0|0|0	0|0|0	0|0|0	0|0|0	0|0|0	0|0|0	0|0|0	0|0|0	0|0|0	0|0|0	0|0|0	0|0|0	0|0|0	0|0|0	0|0|0	0|0|0	0|0|0	0|0|0	0|0|0	0|0|0	0|0|0	0|0|0	0|0|0	0|0|0	0|0|0	0|0|0	1|10274|9	0|0|0	1|250|400	0|0|0	0|0|0	0|0|0	0|0|0	0|0|0	0|0|0	0|0|0	0|0|0	0|0|0	0|0|0	0|0|0	0|0|0	0|0|0	0|0|0	0|0|0	0|0|0
18	0|0|0	0|0|0	1|604|165	0|0|0	0|0|0	0|0|0	0|0|0	0|0|0	0|0|0	0|0|0	0|0|0	0|0|0	0|0|0	0|0|0	0|0|0	0|0|0	0|0|0	0|0|0	0|0|0	0|0|0	0|0|0	0|0|0	0|0|0	0|0|0	0|0|0	0|0|0	0|0|0	0|0|0	0|0|0	0|0|0	1|7237|13	0|0|0	0|0|0	0|0|0	0|0|0	0|0|0	0|0|0	0|0|0	0|0|0	0|0|0	0|0|0	0|0|0	0|0|0	0|0|0	0|0|0	0|0|0	0|0|0	0|0|0	0|0|0
19	0|0|0	0|0|0	0|0|0	0|0|0	0|0|0	0|0|0	0|0|0	0|0|0	0|0|0	0|0|0	0|0|0	0|0|0	0|0|0	0|0|0	0|0|0	0|0|0	0|0|0	0|0|0	0|0|0	0|0|0	0|0|0	0|0|0	0|0|0	0|0|0	0|0|0	0|0|0	0|0|0	0|0|0	0|0|0	0|0|0	0|0|0	0|0|0	0|0|0	0|0|0	0|0|0	0|0|0	0|0|0	0|0|0	0|0|0	0|0|0	0|0|0	0|0|0	0|0|0	0|0|0	0|0|0	0|0|0	0|0|0	0|0|0	0|0|0
20	0|0|0	0|0|0	0|0|0	0|0|0	0|0|0	0|0|0	0|0|0	0|0|0	0|0|0	0|0|0	0|0|0	0|0|0	0|0|0	0|0|0	0|0|0	0|0|0	0|0|0	0|0|0	0|0|0	0|0|0	0|0|0	0|0|0	0|0|0	0|0|0	0|0|0	0|0|0	0|0|0	0|0|0	0|0|0	0|0|0	0|0|0	0|0|0	0|0|0	0|0|0	0|0|0	0|0|0	0|0|0	0|0|0	0|0|0	0|0|0	0|0|0	0|0|0	0|0|0	0|0|0	0|0|0	0|0|0	0|0|0	0|0|0	0|0|0
21	0|0|0	0|0|0	0|0|0	0|0|0	0|0|0	0|0|0	0|0|0	0|0|0	0|0|0	0|0|0	0|0|0	0|0|0	0|0|0	0|0|0	0|0|0	0|0|0	0|0|0	0|0|0	0|0|0	0|0|0	0|0|0	0|0|0	0|0|0	0|0|0	0|0|0	0|0|0	0|0|0	0|0|0	0|0|0	0|0|0	0|0|0	0|0|0	0|0|0	0|0|0	0|0|0	0|0|0	0|0|0	0|0|0	0|0|0	0|0|0	0|0|0	0|0|0	0|0|0	0|0|0	0|0|0	0|0|0	0|0|0	0|0|0	0|0|0
22	0|0|0	0|0|0	0|0|0	0|0|0	0|0|0	0|0|0	0|0|0	0|0|0	0|0|0	0|0|0	0|0|0	0|0|0	0|0|0	0|0|0	0|0|0	0|0|0	0|0|0	0|0|0	0|0|0	0|0|0	0|0|0	0|0|0	0|0|0	0|0|0	0|0|0	0|0|0	0|0|0	0|0|0	0|0|0	0|0|0	0|0|0	0|0|0	0|0|0	0|0|0	0|0|0	0|0|0	0|0|0	0|0|0	0|0|0	0|0|0	0|0|0	0|0|0	0|0|0	0|0|0	0|0|0	0|0|0	0|0|0	0|0|0	0|0|0
23	0|0|0	0|0|0	0|0|0	0|0|0	0|0|0	0|0|0	0|0|0	0|0|0	0|0|0	0|0|0	0|0|0	0|0|0	0|0|0	0|0|0	0|0|0	0|0|0	0|0|0	0|0|0	0|0|0	0|0|0	0|0|0	0|0|0	0|0|0	0|0|0	0|0|0	0|0|0	0|0|0	0|0|0	0|0|0	0|0|0	0|0|0	0|0|0	0|0|0	0|0|0	0|0|0	0|0|0	0|0|0	0|0|0	0|0|0	0|0|0	0|0|0	0|0|0	0|0|0	0|0|0	0|0|0	0|0|0	0|0|0	0|0|0	0|0|0
24	0|0|0	0|0|0	0|0|0	0|0|0	0|0|0	0|0|0	0|0|0	0|0|0	0|0|0	0|0|0	0|0|0	0|0|0	0|0|0	0|0|0	0|0|0	0|0|0	0|0|0	0|0|0	0|0|0	0|0|0	0|0|0	0|0|0	0|0|0	0|0|0	0|0|0	0|0|0	0|0|0	0|0|0	0|0|0	0|0|0	0|0|0	0|0|0	0|0|0	0|0|0	0|0|0	0|0|0	0|0|0	0|0|0	0|0|0	0|0|0	0|0|0	0|0|0	0|0|0	0|0|0	0|0|0	0|0|0	0|0|0	0|0|0	0|0|0
25	0|0|0	0|0|0	0|0|0	0|0|0	0|0|0	0|0|0	0|0|0	0|0|0	0|0|0	0|0|0	0|0|0	0|0|0	0|0|0	0|0|0	0|0|0	0|0|0	0|0|0	0|0|0	0|0|0	0|0|0	0|0|0	0|0|0	0|0|0	0|0|0	0|0|0	0|0|0	0|0|0	0|0|0	0|0|0	0|0|0	0|0|0	0|0|0	0|0|0	0|0|0	0|0|0	0|0|0	0|0|0	0|0|0	0|0|0	0|0|0	0|0|0	0|0|0	0|0|0	0|0|0	0|0|0	0|0|0	0|0|0	0|0|0	0|0|0
26	0|0|0	0|0|0	0|0|0	0|0|0	0|0|0	0|0|0	0|0|0	0|0|0	0|0|0	0|0|0	0|0|0	0|0|0	0|0|0	0|0|0	0|0|0	0|0|0	0|0|0	0|0|0	0|0|0	0|0|0	0|0|0	0|0|0	0|0|0	0|0|0	0|0|0	0|0|0	0|0|0	0|0|0	0|0|0	0|0|0	0|0|0	0|0|0	0|0|0	0|0|0	0|0|0	0|0|0	0|0|0	0|0|0	0|0|0	0|0|0	0|0|0	0|0|0	0|0|0	0|0|0	0|0|0	0|0|0	0|0|0	0|0|0	0|0|0
27	0|0|0	0|0|0	0|0|0	0|0|0	0|0|0	0|0|0	0|0|0	0|0|0	0|0|0	0|0|0	0|0|0	0|0|0	0|0|0	0|0|0	0|0|0	0|0|0	0|0|0	0|0|0	0|0|0	0|0|0	0|0|0	0|0|0	0|0|0	0|0|0	0|0|0	0|0|0	0|0|0	0|0|0	0|0|0	0|0|0	0|0|0	0|0|0	0|0|0	0|0|0	0|0|0	0|0|0	0|0|0	0|0|0	0|0|0	0|0|0	0|0|0	0|0|0	0|0|0	0|0|0	0|0|0	0|0|0	0|0|0	0|0|0	0|0|0
28	0|0|0	0|0|0	0|0|0	0|0|0	0|0|0	0|0|0	0|0|0	0|0|0	0|0|0	0|0|0	0|0|0	0|0|0	0|0|0	0|0|0	0|0|0	0|0|0	0|0|0	0|0|0	0|0|0	0|0|0	0|0|0	0|0|0	0|0|0	0|0|0	0|0|0	0|0|0	0|0|0	0|0|0	0|0|0	0|0|0	0|0|0	0|0|0	0|0|0	0|0|0	0|0|0	0|0|0	0|0|0	0|0|0	0|0|0	0|0|0	0|0|0	0|0|0	0|0|0	0|0|0	0|0|0	0|0|0	0|0|0	0|0|0	0|0|0
29	0|0|0	0|0|0	0|0|0	0|0|0	0|0|0	0|0|0	0|0|0	0|0|0	0|0|0	0|0|0	0|0|0	0|0|0	0|0|0	0|0|0	0|0|0	0|0|0	0|0|0	0|0|0	0|0|0	0|0|0	0|0|0	0|0|0	0|0|0	0|0|0	0|0|0	0|0|0	0|0|0	0|0|0	0|0|0	0|0|0	0|0|0	0|0|0	0|0|0	0|0|0	0|0|0	0|0|0	0|0|0	0|0|0	0|0|0	0|0|0	0|0|0	0|0|0	0|0|0	0|0|0	0|0|0	0|0|0	0|0|0	0|0|0	0|0|0
30	0|0|0	0|0|0	0|0|0	0|0|0	0|0|0	0|0|0	0|0|0	0|0|0	0|0|0	0|0|0	0|0|0	0|0|0	0|0|0	0|0|0	0|0|0	0|0|0	0|0|0	0|0|0	0|0|0	0|0|0	0|0|0	0|0|0	0|0|0	0|0|0	0|0|0	0|0|0	0|0|0	0|0|0	0|0|0	0|0|0	0|0|0	0|0|0	0|0|0	0|0|0	0|0|0	0|0|0	0|0|0	0|0|0	0|0|0	0|0|0	0|0|0	0|0|0	0|0|0	0|0|0	0|0|0	0|0|0	0|0|0	0|0|0	0|0|0
31	0|0|0	0|0|0	0|0|0	0|0|0	0|0|0	0|0|0	0|0|0	0|0|0	0|0|0	0|0|0	0|0|0	0|0|0	0|0|0	0|0|0	0|0|0	0|0|0	0|0|0	0|0|0	0|0|0	0|0|0	0|0|0	0|0|0	0|0|0	0|0|0	0|0|0	0|0|0	0|0|0	0|0|0	0|0|0	0|0|0	0|0|0	0|0|0	0|0|0	0|0|0	0|0|0	0|0|0	0|0|0	0|0|0	0|0|0	0|0|0	0|0|0	0|0|0	0|0|0	0|0|0	0|0|0	0|0|0	0|0|0	0|0|0	0|0|0
32	0|0|0	0|0|0	0|0|0	0|0|0	0|0|0	0|0|0	0|0|0	0|0|0	0|0|0	0|0|0	0|0|0	0|0|0	0|0|0	0|0|0	0|0|0	0|0|0	0|0|0	0|0|0	0|0|0	0|0|0	0|0|0	0|0|0	0|0|0	0|0|0	0|0|0	0|0|0	0|0|0	0|0|0	0|0|0	0|0|0	0|0|0	0|0|0	0|0|0	0|0|0	0|0|0	0|0|0	0|0|0	0|0|0	0|0|0	0|0|0	0|0|0	0|0|0	0|0|0	0|0|0	0|0|0	0|0|0	0|0|0	0|0|0	0|0|0
33	0|0|0	0|0|0	0|0|0	0|0|0	0|0|0	0|0|0	0|0|0	0|0|0	0|0|0	0|0|0	0|0|0	0|0|0	0|0|0	0|0|0	0|0|0	0|0|0	0|0|0	0|0|0	0|0|0	0|0|0	0|0|0	0|0|0	0|0|0	0|0|0	0|0|0	0|0|0	0|0|0	0|0|0	0|0|0	0|0|0	0|0|0	0|0|0	0|0|0	0|0|0	0|0|0	0|0|0	0|0|0	0|0|0	0|0|0	0|0|0	0|0|0	0|0|0	0|0|0	0|0|0	0|0|0	0|0|0	0|0|0	0|0|0	0|0|0
34	0|0|0	0|0|0	0|0|0	0|0|0	0|0|0	0|0|0	0|0|0	0|0|0	0|0|0	0|0|0	0|0|0	0|0|0	0|0|0	0|0|0	0|0|0	0|0|0	0|0|0	0|0|0	0|0|0	0|0|0	0|0|0	0|0|0	0|0|0	0|0|0	0|0|0	0|0|0	0|0|0	0|0|0	0|0|0	0|0|0	0|0|0	0|0|0	0|0|0	0|0|0	0|0|0	0|0|0	0|0|0	0|0|0	0|0|0	0|0|0	0|0|0	0|0|0	0|0|0	0|0|0	0|0|0	0|0|0	0|0|0	0|0|0	0|0|0
35	0|0|0	0|0|0	0|0|0	0|0|0	0|0|0	0|0|0	0|0|0	0|0|0	0|0|0	0|0|0	0|0|0	0|0|0	0|0|0	0|0|0	0|0|0	0|0|0	0|0|0	0|0|0	0|0|0	0|0|0	0|0|0	0|0|0	0|0|0	0|0|0	0|0|0	0|0|0	0|0|0	0|0|0	0|0|0	0|0|0	0|0|0	0|0|0	0|0|0	0|0|0	0|0|0	0|0|0	0|0|0	0|0|0	0|0|0	0|0|0	0|0|0	0|0|0	0|0|0	0|0|0	0|0|0	0|0|0	0|0|0	0|0|0	0|0|0
36	0|0|0	0|0|0	0|0|0	0|0|0	0|0|0	0|0|0	0|0|0	0|0|0	0|0|0	0|0|0	0|0|0	0|0|0	0|0|0	0|0|0	0|0|0	0|0|0	0|0|0	0|0|0	0|0|0	0|0|0	0|0|0	0|0|0	0|0|0	0|0|0	0|0|0	0|0|0	0|0|0	0|0|0	0|0|0	0|0|0	0|0|0	0|0|0	0|0|0	0|0|0	0|0|0	0|0|0	0|0|0	0|0|0	0|0|0	0|0|0	0|0|0	0|0|0	0|0|0	0|0|0	0|0|0	0|0|0	0|0|0	0|0|0	0|0|0
37	0|0|0	0|0|0	0|0|0	0|0|0	0|0|0	0|0|0	0|0|0	0|0|0	0|0|0	0|0|0	0|0|0	0|0|0	0|0|0	0|0|0	0|0|0	0|0|0	0|0|0	0|0|0	0|0|0	0|0|0	0|0|0	0|0|0	0|0|0	0|0|0	0|0|0	0|0|0	0|0|0	0|0|0	0|0|0	0|0|0	0|0|0	0|0|0	0|0|0	0|0|0	0|0|0	0|0|0	0|0|0	0|0|0	0|0|0	0|0|0	0|0|0	0|0|0	0|0|0	0|0|0	0|0|0	0|0|0	0|0|0	0|0|0	0|0|0
38	0|0|0	0|0|0	0|0|0	0|0|0	0|0|0	0|0|0	0|0|0	0|0|0	0|0|0	0|0|0	0|0|0	0|0|0	0|0|0	0|0|0	0|0|0	0|0|0	0|0|0	0|0|0	0|0|0	0|0|0	0|0|0	0|0|0	0|0|0	0|0|0	0|0|0	0|0|0	0|0|0	0|0|0	0|0|0	0|0|0	0|0|0	0|0|0	0|0|0	0|0|0	0|0|0	0|0|0	0|0|0	0|0|0	0|0|0	0|0|0	0|0|0	0|0|0	0|0|0	0|0|0	0|0|0	0|0|0	0|0|0	0|0|0	0|0|0
39	0|0|0	0|0|0	0|0|0	0|0|0	0|0|0	0|0|0	0|0|0	0|0|0	0|0|0	0|0|0	0|0|0	0|0|0	0|0|0	0|0|0	0|0|0	0|0|0	0|0|0	0|0|0	0|0|0	0|0|0	0|0|0	0|0|0	0|0|0	0|0|0	0|0|0	0|0|0	0|0|0	0|0|0	0|0|0	0|0|0	0|0|0	0|0|0	0|0|0	0|0|0	0|0|0	0|0|0	0|0|0	0|0|0	0|0|0	0|0|0	0|0|0	0|0|0	0|0|0	0|0|0	0|0|0	0|0|0	0|0|0	0|0|0	0|0|0
40	0|0|0	0|0|0	0|0|0	0|0|0	0|0|0	0|0|0	0|0|0	0|0|0	0|0|0	0|0|0	0|0|0	0|0|0	0|0|0	0|0|0	0|0|0	0|0|0	0|0|0	0|0|0	0|0|0	0|0|0	0|0|0	0|0|0	0|0|0	0|0|0	0|0|0	0|0|0	0|0|0	0|0|0	0|0|0	0|0|0	0|0|0	0|0|0	0|0|0	0|0|0	0|0|0	0|0|0	0|0|0	0|0|0	0|0|0	0|0|0	0|0|0	0|0|0	0|0|0	0|0|0	0|0|0	0|0|0	0|0|0	0|0|0	0|0|0
41	0|0|0	0|0|0	0|0|0	0|0|0	0|0|0	0|0|0	0|0|0	0|0|0	0|0|0	0|0|0	0|0|0	0|0|0	0|0|0	0|0|0	0|0|0	0|0|0	0|0|0	0|0|0	0|0|0	0|0|0	0|0|0	0|0|0	0|0|0	0|0|0	0|0|0	0|0|0	0|0|0	0|0|0	0|0|0	0|0|0	0|0|0	0|0|0	0|0|0	0|0|0	0|0|0	0|0|0	0|0|0	0|0|0	0|0|0	0|0|0	0|0|0	0|0|0	0|0|0	0|0|0	0|0|0	0|0|0	0|0|0	0|0|0	0|0|0
42	0|0|0	0|0|0	0|0|0	0|0|0	0|0|0	0|0|0	0|0|0	0|0|0	0|0|0	0|0|0	0|0|0	0|0|0	0|0|0	0|0|0	0|0|0	0|0|0	0|0|0	0|0|0	0|0|0	0|0|0	0|0|0	0|0|0	0|0|0	0|0|0	0|0|0	0|0|0	0|0|0	0|0|0	0|0|0	0|0|0	1|17539|5	0|0|0	0|0|0	0|0|0	0|0|0	0|0|0	0|0|0	0|0|0	0|0|0	0|0|0	0|0|0	0|0|0	0|0|0	0|0|0	0|0|0	0|0|0	0|0|0	0|0|0	0|0|0
43	0|0|0	0|0|0	0|0|0	0|0|0	0|0|0	0|0|0	0|0|0	0|0|0	0|0|0	0|0|0	0|0|0	0|0|0	0|0|0	0|0|0	0|0|0	0|0|0	0|0|0	0|0|0	0|0|0	0|0|0	0|0|0	0|0|0	0|0|0	0|0|0	0|0|0	0|0|0	0|0|0	0|0|0	0|0|0	0|0|0	0|0|0	0|0|0	0|0|0	0|0|0	0|0|0	0|0|0	0|0|0	0|0|0	0|0|0	0|0|0	0|0|0	0|0|0	0|0|0	0|0|0	0|0|0	0|0|0	0|0|0	0|0|0	0|0|0
44	0|0|0	0|0|0	0|0|0	0|0|0	0|0|0	0|0|0	0|0|0	0|0|0	0|0|0	0|0|0	0|0|0	0|0|0	0|0|0	0|0|0	0|0|0	0|0|0	0|0|0	0|0|0	0|0|0	0|0|0	0|0|0	0|0|0	0|0|0	0|0|0	0|0|0	0|0|0	0|0|0	0|0|0	0|0|0	0|0|0	0|0|0	0|0|0	0|0|0	0|0|0	0|0|0	0|0|0	0|0|0	0|0|0	0|0|0	0|0|0	0|0|0	0|0|0	0|0|0	0|0|0	0|0|0	0|0|0	0|0|0	0|0|0	0|0|0
45	0|0|0	0|0|0	0|0|0	0|0|0	0|0|0	0|0|0	0|0|0	0|0|0	0|0|0	0|0|0	0|0|0	0|0|0	0|0|0	0|0|0	0|0|0	0|0|0	0|0|0	0|0|0	0|0|0	0|0|0	0|0|0	0|0|0	0|0|0	0|0|0	0|0|0	0|0|0	0|0|0	0|0|0	0|0|0	0|0|0	0|0|0	0|0|0	0|0|0	0|0|0	0|0|0	0|0|0	0|0|0	0|0|0	0|0|0	0|0|0	0|0|0	0|0|0	0|0|0	0|0|0	0|0|0	0|0|0	0|0|0	0|0|0	0|0|0
46	0|0|0	0|0|0	0|0|0	0|0|0	0|0|0	0|0|0	0|0|0	0|0|0	0|0|0	0|0|0	0|0|0	0|0|0	0|0|0	0|0|0	0|0|0	0|0|0	0|0|0	0|0|0	0|0|0	0|0|0	0|0|0	0|0|0	0|0|0	0|0|0	0|0|0	0|0|0	0|0|0	0|0|0	0|0|0	0|0|0	0|0|0	0|0|0	0|0|0	0|0|0	0|0|0	0|0|0	0|0|0	0|0|0	0|0|0	0|0|0	0|0|0	0|0|0	0|0|0	0|0|0	0|0|0	0|0|0	0|0|0	0|0|0	0|0|0
47	0|0|0	0|0|0	0|0|0	0|0|0	0|0|0	0|0|0	0|0|0	0|0|0	0|0|0	0|0|0	0|0|0	0|0|0	0|0|0	0|0|0	0|0|0	0|0|0	0|0|0	0|0|0	0|0|0	0|0|0	0|0|0	0|0|0	0|0|0	0|0|0	0|0|0	0|0|0	0|0|0	0|0|0	0|0|0	0|0|0	0|0|0	0|0|0	0|0|0	0|0|0	0|0|0	0|0|0	0|0|0	0|0|0	0|0|0	0|0|0	0|0|0	0|0|0	0|0|0	0|0|0	0|0|0	0|0|0	0|0|0	0|0|0	0|0|0
48	0|0|0	0|0|0	0|0|0	0|0|0	0|0|0	0|0|0	0|0|0	0|0|0	0|0|0	0|0|0	0|0|0	0|0|0	0|0|0	0|0|0	0|0|0	0|0|0	0|0|0	0|0|0	0|0|0	0|0|0	0|0|0	0|0|0	0|0|0	0|0|0	0|0|0	0|0|0	0|0|0	0|0|0	0|0|0	0|0|0	0|0|0	0|0|0	0|0|0	0|0|0	0|0|0	0|0|0	0|0|0	0|0|0	0|0|0	0|0|0	0|0|0	0|0|0	0|0|0	0|0|0	0|0|0	0|0|0	0|0|0	0|0|0	0|0|0
49	0|0|0	0|0|0	0|0|0	0|0|0	0|0|0	0|0|0	0|0|0	0|0|0	0|0|0	0|0|0	0|0|0	0|0|0	0|0|0	0|0|0	0|0|0	0|0|0	0|0|0	0|0|0	0|0|0	0|0|0	0|0|0	0|0|0	0|0|0	0|0|0	0|0|0	0|0|0	0|0|0	0|0|0	0|0|0	0|0|0	0|0|0	0|0|0	0|0|0	0|0|0	0|0|0	0|0|0	0|0|0	0|0|0	0|0|0	0|0|0	0|0|0	0|0|0	0|0|0	0|0|0	0|0|0	0|0|0	0|0|0	0|0|0	0|0|0
50	0|0|0	0|0|0	0|0|0	0|0|0	0|0|0	0|0|0	0|0|0	0|0|0	0|0|0	0|0|0	0|0|0	0|0|0	0|0|0	0|0|0	0|0|0	0|0|0	0|0|0	0|0|0	0|0|0	0|0|0	0|0|0	0|0|0	0|0|0	0|0|0	0|0|0	0|0|0	0|0|0	0|0|0	0|0|0	0|0|0	0|0|0	0|0|0	0|0|0	0|0|0	0|0|0	0|0|0	0|0|0	0|0|0	0|0|0	0|0|0	0|0|0	0|0|0	0|0|0	0|0|0	0|0|0	0|0|0	0|0|0	0|0|0	0|0|0
51	0|0|0	0|0|0	0|0|0	0|0|0	0|0|0	0|0|0	0|0|0	0|0|0	0|0|0	0|0|0	0|0|0	0|0|0	0|0|0	0|0|0	0|0|0	0|0|0	0|0|0	0|0|0	0|0|0	0|0|0	0|0|0	0|0|0	0|0|0	0|0|0	0|0|0	0|0|0	0|0|0	0|0|0	0|0|0	0|0|0	0|0|0	0|0|0	0|0|0	0|0|0	0|0|0	0|0|0	0|0|0	0|0|0	0|0|0	0|0|0	0|0|0	0|0|0	0|0|0	0|0|0	0|0|0	0|0|0	0|0|0	0|0|0	0|0|0
52	0|0|0	0|0|0	0|0|0	0|0|0	0|0|0	0|0|0	0|0|0	0|0|0	0|0|0	0|0|0	0|0|0	0|0|0	0|0|0	0|0|0	0|0|0	0|0|0	0|0|0	0|0|0	0|0|0	0|0|0	0|0|0	0|0|0	0|0|0	0|0|0	0|0|0	0|0|0	0|0|0	0|0|0	0|0|0	0|0|0	0|0|0	0|0|0	0|0|0	0|0|0	0|0|0	0|0|0	0|0|0	0|0|0	0|0|0	0|0|0	0|0|0	0|0|0	0|0|0	0|0|0	0|0|0	0|0|0	0|0|0	0|0|0	0|0|0
53	0|0|0	0|0|0	0|0|0	0|0|0	0|0|0	0|0|0	0|0|0	0|0|0	0|0|0	0|0|0	0|0|0	0|0|0	0|0|0	0|0|0	0|0|0	0|0|0	0|0|0	0|0|0	0|0|0	0|0|0	0|0|0	0|0|0	0|0|0	0|0|0	0|0|0	0|0|0	0|0|0	0|0|0	0|0|0	0|0|0	0|0|0	0|0|0	0|0|0	0|0|0	0|0|0	0|0|0	0|0|0	0|0|0	0|0|0	0|0|0	0|0|0	0|0|0	0|0|0	0|0|0	0|0|0	0|0|0	0|0|0	0|0|0	0|0|0
54	0|0|0	0|0|0	0|0|0	0|0|0	0|0|0	0|0|0	0|0|0	0|0|0	0|0|0	0|0|0	0|0|0	0|0|0	0|0|0	0|0|0	0|0|0	0|0|0	0|0|0	0|0|0	0|0|0	0|0|0	0|0|0	0|0|0	0|0|0	0|0|0	0|0|0	0|0|0	0|0|0	0|0|0	0|0|0	0|0|0	0|0|0	0|0|0	0|0|0	0|0|0	0|0|0	0|0|0	0|0|0	0|0|0	0|0|0	0|0|0	0|0|0	0|0|0	0|0|0	0|0|0	0|0|0	0|0|0	0|0|0	0|0|0	0|0|0
55	0|0|0	0|0|0	0|0|0	0|0|0	0|0|0	0|0|0	0|0|0	0|0|0	0|0|0	0|0|0	0|0|0	0|0|0	0|0|0	0|0|0	0|0|0	0|0|0	0|0|0	0|0|0	0|0|0	0|0|0	0|0|0	0|0|0	0|0|0	0|0|0	0|0|0	0|0|0	0|0|0	0|0|0	0|0|0	0|0|0	0|0|0	0|0|0	0|0|0	0|0|0	0|0|0	0|0|0	0|0|0	0|0|0	0|0|0	0|0|0	0|0|0	0|0|0	0|0|0	0|0|0	0|0|0	0|0|0	0|0|0	0|0|0	0|0|0
56	0|0|0	0|0|0	0|0|0	0|0|0	0|0|0	0|0|0	0|0|0	0|0|0	0|0|0	0|0|0	0|0|0	0|0|0	0|0|0	0|0|0	0|0|0	0|0|0	0|0|0	0|0|0	0|0|0	0|0|0	0|0|0	0|0|0	0|0|0	0|0|0	0|0|0	0|0|0	0|0|0	0|0|0	0|0|0	0|0|0	0|0|0	0|0|0	0|0|0	0|0|0	0|0|0	0|0|0	0|0|0	0|0|0	0|0|0	0|0|0	0|0|0	0|0|0	0|0|0	0|0|0	0|0|0	0|0|0	0|0|0	0|0|0	0|0|0
57	0|0|0	0|0|0	0|0|0	0|0|0	0|0|0	0|0|0	0|0|0	0|0|0	0|0|0	0|0|0	0|0|0	0|0|0	0|0|0	0|0|0	0|0|0	0|0|0	0|0|0	0|0|0	0|0|0	0|0|0	0|0|0	0|0|0	0|0|0	0|0|0	0|0|0	0|0|0	0|0|0	0|0|0	0|0|0	0|0|0	0|0|0	0|0|0	0|0|0	0|0|0	0|0|0	0|0|0	0|0|0	0|0|0	0|0|0	0|0|0	0|0|0	0|0|0	0|0|0	0|0|0	0|0|0	0|0|0	0|0|0	0|0|0	0|0|0
58	0|0|0	0|0|0	0|0|0	0|0|0	0|0|0	0|0|0	0|0|0	0|0|0	0|0|0	0|0|0	0|0|0	0|0|0	0|0|0	0|0|0	0|0|0	0|0|0	0|0|0	0|0|0	0|0|0	0|0|0	0|0|0	0|0|0	0|0|0	0|0|0	0|0|0	0|0|0	0|0|0	0|0|0	0|0|0	0|0|0	0|0|0	0|0|0	0|0|0	0|0|0	0|0|0	0|0|0	0|0|0	0|0|0	0|0|0	0|0|0	0|0|0	0|0|0	0|0|0	0|0|0	0|0|0	0|0|0	0|0|0	0|0|0	0|0|0
59	0|0|0	0|0|0	0|0|0	0|0|0	0|0|0	0|0|0	0|0|0	0|0|0	0|0|0	0|0|0	0|0|0	0|0|0	0|0|0	0|0|0	0|0|0	0|0|0	0|0|0	0|0|0	0|0|0	0|0|0	0|0|0	0|0|0	0|0|0	0|0|0	0|0|0	0|0|0	0|0|0	0|0|0	0|0|0	0|0|0	0|0|0	0|0|0	0|0|0	0|0|0	0|0|0	0|0|0	0|0|0	0|0|0	0|0|0	0|0|0	0|0|0	0|0|0	0|0|0	0|0|0	0|0|0	0|0|0	0|0|0	0|0|0	0|0|0
60	0|0|0	0|0|0	0|0|0	0|0|0	0|0|0	0|0|0	0|0|0	0|0|0	0|0|0	0|0|0	0|0|0	0|0|0	0|0|0	0|0|0	0|0|0	0|0|0	0|0|0	0|0|0	0|0|0	0|0|0	0|0|0	0|0|0	0|0|0	0|0|0	0|0|0	0|0|0	0|0|0	0|0|0	0|0|0	0|0|0	0|0|0	0|0|0	0|0|0	0|0|0	0|0|0	0|0|0	0|0|0	0|0|0	0|0|0	0|0|0	0|0|0	0|0|0	0|0|0	0|0|0	0|0|0	0|0|0	0|0|0	0|0|0	0|0|0
61	0|0|0	0|0|0	0|0|0	0|0|0	0|0|0	0|0|0	0|0|0	0|0|0	0|0|0	0|0|0	0|0|0	0|0|0	0|0|0	0|0|0	0|0|0	0|0|0	0|0|0	0|0|0	0|0|0	0|0|0	0|0|0	0|0|0	0|0|0	0|0|0	0|0|0	0|0|0	0|0|0	0|0|0	0|0|0	0|0|0	0|0|0	0|0|0	0|0|0	0|0|0	0|0|0	0|0|0	0|0|0	0|0|0	0|0|0	0|0|0	0|0|0	0|0|0	0|0|0	0|0|0	0|0|0	0|0|0	0|0|0	0|0|0	0|0|0
62	0|0|0	0|0|0	0|0|0	0|0|0	0|0|0	0|0|0	0|0|0	0|0|0	0|0|0	0|0|0	0|0|0	0|0|0	0|0|0	0|0|0	0|0|0	0|0|0	0|0|0	0|0|0	0|0|0	0|0|0	0|0|0	0|0|0	0|0|0	0|0|0	0|0|0	0|0|0	0|0|0	0|0|0	0|0|0	0|0|0	0|0|0	0|0|0	0|0|0	0|0|0	0|0|0	0|0|0	0|0|0	0|0|0	0|0|0	0|0|0	0|0|0	0|0|0	0|0|0	0|0|0	0|0|0	0|0|0	0|0|0	0|0|0	0|0|0
63	0|0|0	0|0|0	0|0|0	0|0|0	0|0|0	0|0|0	0|0|0	0|0|0	0|0|0	0|0|0	0|0|0	0|0|0	0|0|0	0|0|0	0|0|0	0|0|0	0|0|0	0|0|0	0|0|0	0|0|0	0|0|0	0|0|0	0|0|0	0|0|0	0|0|0	0|0|0	0|0|0	0|0|0	0|0|0	0|0|0	0|0|0	0|0|0	0|0|0	0|0|0	0|0|0	0|0|0	0|0|0	0|0|0	0|0|0	0|0|0	0|0|0	0|0|0	0|0|0	0|0|0	0|0|0	0|0|0	0|0|0	0|0|0	0|0|0
64	0|0|0	0|0|0	0|0|0	0|0|0	0|0|0	0|0|0	0|0|0	0|0|0	0|0|0	0|0|0	0|0|0	0|0|0	0|0|0	0|0|0	0|0|0	0|0|0	0|0|0	0|0|0	0|0|0	0|0|0	0|0|0	0|0|0	0|0|0	0|0|0	0|0|0	0|0|0	0|0|0	0|0|0	0|0|0	0|0|0	0|0|0	0|0|0	0|0|0	0|0|0	0|0|0	0|0|0	0|0|0	0|0|0	0|0|0	0|0|0	0|0|0	0|0|0	0|0|0	0|0|0	0|0|0	0|0|0	0|0|0	0|0|0	0|0|0
65	0|0|0	0|0|0	0|0|0	0|0|0	0|0|0	0|0|0	0|0|0	0|0|0	0|0|0	0|0|0	0|0|0	0|0|0	0|0|0	0|0|0	0|0|0	0|0|0	0|0|0	0|0|0	0|0|0	0|0|0	0|0|0	0|0|0	0|0|0	0|0|0	0|0|0	0|0|0	0|0|0	0|0|0	0|0|0	0|0|0	0|0|0	0|0|0	0|0|0	0|0|0	0|0|0	0|0|0	0|0|0	0|0|0	0|0|0	0|0|0	0|0|0	0|0|0	0|0|0	0|0|0	0|0|0	0|0|0	0|0|0	0|0|0	0|0|0
66	0|0|0	0|0|0	0|0|0	0|0|0	0|0|0	0|0|0	0|0|0	0|0|0	0|0|0	0|0|0	0|0|0	0|0|0	0|0|0	0|0|0	0|0|0	0|0|0	0|0|0	0|0|0	0|0|0	0|0|0	0|0|0	0|0|0	0|0|0	0|0|0	0|0|0	0|0|0	0|0|0	0|0|0	0|0|0	0|0|0	0|0|0	0|0|0	0|0|0	0|0|0	0|0|0	0|0|0	0|0|0	0|0|0	0|0|0	0|0|0	0|0|0	0|0|0	0|0|0	0|0|0	0|0|0	0|0|0	0|0|0	0|0|0	0|0|0
67	0|0|0	0|0|0	0|0|0	0|0|0	0|0|0	0|0|0	0|0|0	0|0|0	0|0|0	0|0|0	0|0|0	0|0|0	0|0|0	0|0|0	0|0|0	0|0|0	0|0|0	0|0|0	0|0|0	0|0|0	0|0|0	0|0|0	0|0|0	0|0|0	0|0|0	0|0|0	0|0|0	0|0|0	0|0|0	0|0|0	0|0|0	0|0|0	0|0|0	0|0|0	0|0|0	0|0|0	0|0|0	0|0|0	0|0|0	0|0|0	0|0|0	0|0|0	0|0|0	0|0|0	0|0|0	0|0|0	0|0|0	0|0|0	0|0|0
68	0|0|0	0|0|0	0|0|0	0|0|0	0|0|0	0|0|0	0|0|0	0|0|0	0|0|0	0|0|0	0|0|0	0|0|0	0|0|0	0|0|0	0|0|0	0|0|0	0|0|0	0|0|0	0|0|0	0|0|0	0|0|0	0|0|0	0|0|0	0|0|0	0|0|0	0|0|0	0|0|0	0|0|0	0|0|0	0|0|0	0|0|0	0|0|0	0|0|0	0|0|0	0|0|0	0|0|0	0|0|0	0|0|0	0|0|0	0|0|0	0|0|0	0|0|0	0|0|0	0|0|0	0|0|0	0|0|0	0|0|0	0|0|0	0|0|0
69	0|0|0	0|0|0	0|0|0	0|0|0	0|0|0	0|0|0	0|0|0	0|0|0	0|0|0	0|0|0	0|0|0	0|0|0	0|0|0	0|0|0	0|0|0	0|0|0	0|0|0	0|0|0	0|0|0	0|0|0	0|0|0	0|0|0	0|0|0	0|0|0	0|0|0	0|0|0	0|0|0	0|0|0	0|0|0	0|0|0	0|0|0	0|0|0	0|0|0	0|0|0	0|0|0	0|0|0	0|0|0	0|0|0	0|0|0	0|0|0	0|0|0	0|0|0	0|0|0	0|0|0	0|0|0	0|0|0	0|0|0	0|0|0	0|0|0
70	0|0|0	0|0|0	0|0|0	0|0|0	0|0|0	0|0|0	0|0|0	0|0|0	0|0|0	0|0|0	0|0|0	0|0|0	0|0|0	0|0|0	0|0|0	0|0|0	0|0|0	0|0|0	0|0|0	0|0|0	0|0|0	0|0|0	0|0|0	0|0|0	0|0|0	0|0|0	0|0|0	0|0|0	0|0|0	0|0|0	0|0|0	0|0|0	0|0|0	0|0|0	0|0|0	0|0|0	0|0|0	0|0|0	0|0|0	0|0|0	0|0|0	0|0|0	0|0|0	0|0|0	0|0|0	0|0|0	0|0|0	0|0|0	0|0|0
71	0|0|0	0|0|0	0|0|0	0|0|0	0|0|0	0|0|0	0|0|0	0|0|0	0|0|0	0|0|0	0|0|0	0|0|0	0|0|0	0|0|0	0|0|0	0|0|0	0|0|0	0|0|0	0|0|0	0|0|0	0|0|0	0|0|0	0|0|0	0|0|0	0|0|0	0|0|0	0|0|0	0|0|0	0|0|0	0|0|0	0|0|0	0|0|0	0|0|0	0|0|0	0|0|0	0|0|0	0|0|0	0|0|0	0|0|0	0|0|0	0|0|0	0|0|0	0|0|0	0|0|0	0|0|0	0|0|0	0|0|0	0|0|0	0|0|0
72	0|0|0	0|0|0	0|0|0	0|0|0	0|0|0	0|0|0	0|0|0	0|0|0	0|0|0	0|0|0	0|0|0	0|0|0	0|0|0	0|0|0	0|0|0	0|0|0	0|0|0	0|0|0	0|0|0	0|0|0	0|0|0	0|0|0	0|0|0	0|0|0	0|0|0	0|0|0	0|0|0	0|0|0	0|0|0	0|0|0	0|0|0	0|0|0	0|0|0	0|0|0	0|0|0	0|0|0	0|0|0	0|0|0	0|0|0	0|0|0	0|0|0	0|0|0	0|0|0	0|0|0	0|0|0	0|0|0	0|0|0	0|0|0	0|0|0
73	0|0|0	0|0|0	0|0|0	0|0|0	0|0|0	0|0|0	0|0|0	0|0|0	0|0|0	0|0|0	0|0|0	0|0|0	0|0|0	0|0|0	0|0|0	0|0|0	0|0|0	0|0|0	0|0|0	0|0|0	0|0|0	0|0|0	0|0|0	0|0|0	0|0|0	0|0|0	0|0|0	0|0|0	0|0|0	0|0|0	0|0|0	0|0|0	0|0|0	0|0|0	0|0|0	0|0|0	0|0|0	0|0|0	0|0|0	0|0|0	0|0|0	0|0|0	0|0|0	0|0|0	0|0|0	0|0|0	0|0|0	0|0|0	0|0|0
74	0|0|0	0|0|0	0|0|0	0|0|0	0|0|0	0|0|0	0|0|0	0|0|0	0|0|0	0|0|0	0|0|0	0|0|0	0|0|0	0|0|0	0|0|0	0|0|0	0|0|0	0|0|0	0|0|0	0|0|0	0|0|0	0|0|0	0|0|0	0|0|0	0|0|0	0|0|0	0|0|0	0|0|0	0|0|0	0|0|0	0|0|0	0|0|0	0|0|0	0|0|0	0|0|0	0|0|0	0|0|0	0|0|0	0|0|0	0|0|0	0|0|0	0|0|0	0|0|0	0|0|0	0|0|0	0|0|0	0|0|0	0|0|0	0|0|0
75	0|0|0	0|0|0	0|0|0	0|0|0	0|0|0	0|0|0	0|0|0	0|0|0	0|0|0	0|0|0	0|0|0	0|0|0	0|0|0	0|0|0	0|0|0	0|0|0	0|0|0	0|0|0	0|0|0	0|0|0	0|0|0	0|0|0	0|0|0	0|0|0	0|0|0	0|0|0	0|0|0	0|0|0	0|0|0	0|0|0	0|0|0	0|0|0	0|0|0	0|0|0	0|0|0	0|0|0	0|0|0	0|0|0	0|0|0	0|0|0	0|0|0	0|0|0	0|0|0	0|0|0	0|0|0	0|0|0	0|0|0	0|0|0	0|0|0
76	0|0|0	0|0|0	0|0|0	0|0|0	0|0|0	0|0|0	0|0|0	0|0|0	0|0|0	0|0|0	0|0|0	0|0|0	0|0|0	0|0|0	0|0|0	0|0|0	0|0|0	0|0|0	0|0|0	0|0|0	0|0|0	0|0|0	0|0|0	0|0|0	0|0|0	0|0|0	0|0|0	0|0|0	0|0|0	0|0|0	0|0|0	0|0|0	0|0|0	0|0|0	0|0|0	0|0|0	0|0|0	0|0|0	0|0|0	0|0|0	0|0|0	0|0|0	0|0|0	0|0|0	0|0|0	0|0|0	0|0|0	0|0|0	0|0|0
77	0|0|0	0|0|0	0|0|0	0|0|0	0|0|0	0|0|0	0|0|0	0|0|0	0|0|0	0|0|0	0|0|0	0|0|0	0|0|0	0|0|0	0|0|0	0|0|0	0|0|0	0|0|0	0|0|0	0|0|0	0|0|0	0|0|0	0|0|0	0|0|0	0|0|0	0|0|0	0|0|0	0|0|0	0|0|0	0|0|0	0|0|0	0|0|0	0|0|0	0|0|0	0|0|0	0|0|0	0|0|0	0|0|0	0|0|0	0|0|0	0|0|0	0|0|0	0|0|0	0|0|0	0|0|0	0|0|0	0|0|0	0|0|0	0|0|0
78	0|0|0	0|0|0	0|0|0	0|0|0	0|0|0	0|0|0	0|0|0	0|0|0	0|0|0	0|0|0	0|0|0	0|0|0	0|0|0	0|0|0	0|0|0	0|0|0	0|0|0	0|0|0	0|0|0	0|0|0	0|0|0	0|0|0	0|0|0	0|0|0	0|0|0	0|0|0	0|0|0	0|0|0	0|0|0	0|0|0	0|0|0	0|0|0	0|0|0	0|0|0	0|0|0	0|0|0	0|0|0	0|0|0	0|0|0	0|0|0	0|0|0	0|0|0	0|0|0	0|0|0	0|0|0	0|0|0	0|0|0	0|0|0	0|0|0
79	0|0|0	0|0|0	0|0|0	0|0|0	0|0|0	0|0|0	0|0|0	0|0|0	0|0|0	0|0|0	0|0|0	0|0|0	0|0|0	0|0|0	0|0|0	0|0|0	0|0|0	0|0|0	0|0|0	0|0|0	0|0|0	0|0|0	0|0|0	0|0|0	0|0|0	0|0|0	0|0|0	0|0|0	0|0|0	0|0|0	0|0|0	0|0|0	0|0|0	0|0|0	0|0|0	0|0|0	0|0|0	0|0|0	0|0|0	0|0|0	0|0|0	0|0|0	0|0|0	0|0|0	0|0|0	0|0|0	0|0|0	0|0|0	0|0|0
80	0|0|0	0|0|0	0|0|0	0|0|0	0|0|0	0|0|0	0|0|0	0|0|0	0|0|0	0|0|0	0|0|0	0|0|0	0|0|0	0|0|0	0|0|0	0|0|0	0|0|0	0|0|0	0|0|0	0|0|0	0|0|0	0|0|0	0|0|0	0|0|0	0|0|0	0|0|0	0|0|0	0|0|0	0|0|0	0|0|0	0|0|0	0|0|0	0|0|0	0|0|0	0|0|0	0|0|0	0|0|0	0|0|0	0|0|0	0|0|0	0|0|0	0|0|0	0|0|0	0|0|0	0|0|0	0|0|0	0|0|0	0|0|0	0|0|0
81	0|0|0	0|0|0	0|0|0	0|0|0	0|0|0	0|0|0	0|0|0	0|0|0	0|0|0	0|0|0	0|0|0	0|0|0	0|0|0	0|0|0	0|0|0	0|0|0	0|0|0	0|0|0	0|0|0	0|0|0	0|0|0	0|0|0	0|0|0	0|0|0	0|0|0	0|0|0	0|0|0	0|0|0	0|0|0	0|0|0	0|0|0	0|0|0	0|0|0	0|0|0	0|0|0	0|0|0	0|0|0	0|0|0	0|0|0	0|0|0	0|0|0	0|0|0	0|0|0	0|0|0	0|0|0	0|0|0	0|0|0	0|0|0	0|0|0
82	0|0|0	0|0|0	0|0|0	0|0|0	0|0|0	0|0|0	0|0|0	0|0|0	0|0|0	0|0|0	0|0|0	0|0|0	0|0|0	0|0|0	0|0|0	0|0|0	0|0|0	0|0|0	0|0|0	0|0|0	0|0|0	0|0|0	0|0|0	0|0|0	0|0|0	0|0|0	0|0|0	0|0|0	0|0|0	0|0|0	0|0|0	0|0|0	0|0|0	0|0|0	0|0|0	0|0|0	0|0|0	0|0|0	0|0|0	0|0|0	0|0|0	0|0|0	0|0|0	0|0|0	0|0|0	0|0|0	0|0|0	0|0|0	0|0|0
83	0|0|0	0|0|0	0|0|0	0|0|0	0|0|0	0|0|0	0|0|0	0|0|0	0|0|0	0|0|0	0|0|0	0|0|0	0|0|0	0|0|0	0|0|0	0|0|0	0|0|0	0|0|0	0|0|0	0|0|0	0|0|0	0|0|0	0|0|0	0|0|0	0|0|0	0|0|0	0|0|0	0|0|0	0|0|0	0|0|0	0|0|0	0|0|0	0|0|0	0|0|0	0|0|0	0|0|0	0|0|0	0|0|0	0|0|0	0|0|0	0|0|0	0|0|0	0|0|0	0|0|0	0|0|0	0|0|0	0|0|0	0|0|0	0|0|0
84	0|0|0	0|0|0	0|0|0	0|0|0	0|0|0	0|0|0	0|0|0	0|0|0	0|0|0	0|0|0	0|0|0	0|0|0	0|0|0	0|0|0	0|0|0	0|0|0	0|0|0	0|0|0	0|0|0	0|0|0	0|0|0	0|0|0	0|0|0	0|0|0	0|0|0	0|0|0	0|0|0	0|0|0	0|0|0	0|0|0	0|0|0	0|0|0	0|0|0	0|0|0	0|0|0	0|0|0	0|0|0	0|0|0	0|0|0	0|0|0	0|0|0	0|0|0	0|0|0	0|0|0	0|0|0	0|0|0	0|0|0	0|0|0	0|0|0
85	0|0|0	0|0|0	0|0|0	0|0|0	0|0|0	0|0|0	0|0|0	0|0|0	0|0|0	0|0|0	0|0|0	0|0|0	0|0|0	0|0|0	0|0|0	0|0|0	0|0|0	0|0|0	0|0|0	0|0|0	0|0|0	0|0|0	0|0|0	0|0|0	0|0|0	0|0|0	0|0|0	0|0|0	0|0|0	0|0|0	0|0|0	0|0|0	0|0|0	0|0|0	0|0|0	0|0|0	0|0|0	0|0|0	0|0|0	0|0|0	0|0|0	0|0|0	0|0|0	0|0|0	0|0|0	0|0|0	0|0|0	0|0|0	0|0|0
86	0|0|0	0|0|0	0|0|0	0|0|0	0|0|0	0|0|0	0|0|0	0|0|0	0|0|0	0|0|0	0|0|0	0|0|0	0|0|0	0|0|0	0|0|0	0|0|0	0|0|0	0|0|0	0|0|0	0|0|0	0|0|0	0|0|0	0|0|0	0|0|0	0|0|0	0|0|0	0|0|0	0|0|0	0|0|0	0|0|0	0|0|0	0|0|0	0|0|0	0|0|0	0|0|0	0|0|0	0|0|0	0|0|0	0|0|0	0|0|0	0|0|0	0|0|0	0|0|0	0|0|0	0|0|0	0|0|0	0|0|0	0|0|0	0|0|0
87	0|0|0	0|0|0	0|0|0	0|0|0	0|0|0	0|0|0	0|0|0	0|0|0	0|0|0	0|0|0	0|0|0	0|0|0	0|0|0	0|0|0	0|0|0	0|0|0	0|0|0	0|0|0	0|0|0	0|0|0	0|0|0	0|0|0	0|0|0	0|0|0	0|0|0	0|0|0	0|0|0	0|0|0	0|0|0	0|0|0	0|0|0	0|0|0	0|0|0	0|0|0	0|0|0	0|0|0	0|0|0	0|0|0	0|0|0	0|0|0	0|0|0	0|0|0	0|0|0	0|0|0	0|0|0	0|0|0	0|0|0	0|0|0	0|0|0
88	0|0|0	0|0|0	0|0|0	0|0|0	0|0|0	0|0|0	0|0|0	0|0|0	0|0|0	0|0|0	0|0|0	0|0|0	0|0|0	0|0|0	0|0|0	0|0|0	0|0|0	0|0|0	0|0|0	0|0|0	0|0|0	0|0|0	0|0|0	0|0|0	0|0|0	0|0|0	0|0|0	0|0|0	0|0|0	0|0|0	0|0|0	0|0|0	0|0|0	0|0|0	0|0|0	0|0|0	0|0|0	0|0|0	0|0|0	0|0|0	0|0|0	0|0|0	0|0|0	0|0|0	0|0|0	0|0|0	0|0|0	0|0|0	0|0|0
89	0|0|0	0|0|0	0|0|0	0|0|0	0|0|0	0|0|0	0|0|0	0|0|0	0|0|0	0|0|0	0|0|0	0|0|0	0|0|0	0|0|0	0|0|0	0|0|0	0|0|0	0|0|0	0|0|0	0|0|0	0|0|0	0|0|0	0|0|0	0|0|0	0|0|0	0|0|0	0|0|0	0|0|0	0|0|0	0|0|0	0|0|0	0|0|0	0|0|0	0|0|0	0|0|0	0|0|0	0|0|0	0|0|0	0|0|0	0|0|0	0|0|0	0|0|0	0|0|0	0|0|0	0|0|0	0|0|0	0|0|0	0|0|0	0|0|0
90	0|0|0	0|0|0	0|0|0	0|0|0	0|0|0	0|0|0	0|0|0	0|0|0	0|0|0	0|0|0	0|0|0	0|0|0	0|0|0	0|0|0	0|0|0	0|0|0	0|0|0	0|0|0	0|0|0	0|0|0	0|0|0	0|0|0	0|0|0	0|0|0	0|0|0	0|0|0	0|0|0	0|0|0	0|0|0	0|0|0	0|0|0	0|0|0	0|0|0	0|0|0	0|0|0	0|0|0	0|0|0	0|0|0	0|0|0	0|0|0	0|0|0	0|0|0	0|0|0	0|0|0	0|0|0	0|0|0	0|0|0	0|0|0	0|0|0
91	0|0|0	0|0|0	0|0|0	0|0|0	0|0|0	0|0|0	0|0|0	0|0|0	0|0|0	0|0|0	0|0|0	0|0|0	0|0|0	0|0|0	0|0|0	0|0|0	0|0|0	0|0|0	0|0|0	0|0|0	0|0|0	0|0|0	0|0|0	0|0|0	0|0|0	0|0|0	0|0|0	0|0|0	0|0|0	0|0|0	0|0|0	0|0|0	0|0|0	0|0|0	0|0|0	0|0|0	0|0|0	0|0|0	0|0|0	0|0|0	0|0|0	0|0|0	0|0|0	0|0|0	0|0|0	0|0|0	0|0|0	0|0|0	0|0|0
92	0|0|0	0|0|0	0|0|0	0|0|0	0|0|0	0|0|0	0|0|0	0|0|0	0|0|0	0|0|0	0|0|0	0|0|0	0|0|0	0|0|0	0|0|0	0|0|0	0|0|0	0|0|0	0|0|0	0|0|0	0|0|0	0|0|0	0|0|0	0|0|0	0|0|0	0|0|0	0|0|0	0|0|0	0|0|0	0|0|0	0|0|0	0|0|0	0|0|0	0|0|0	0|0|0	0|0|0	0|0|0	0|0|0	0|0|0	0|0|0	0|0|0	0|0|0	0|0|0	0|0|0	0|0|0	0|0|0	0|0|0	0|0|0	0|0|0
93	0|0|0	0|0|0	0|0|0	0|0|0	0|0|0	0|0|0	0|0|0	0|0|0	0|0|0	0|0|0	0|0|0	0|0|0	0|0|0	0|0|0	0|0|0	0|0|0	0|0|0	0|0|0	0|0|0	0|0|0	0|0|0	0|0|0	0|0|0	0|0|0	0|0|0	0|0|0	0|0|0	0|0|0	0|0|0	0|0|0	0|0|0	0|0|0	0|0|0	0|0|0	0|0|0	0|0|0	0|0|0	0|0|0	0|0|0	0|0|0	0|0|0	0|0|0	0|0|0	0|0|0	0|0|0	0|0|0	0|0|0	0|0|0	0|0|0
94	0|0|0	0|0|0	0|0|0	0|0|0	0|0|0	0|0|0	0|0|0	0|0|0	0|0|0	0|0|0	0|0|0	0|0|0	0|0|0	0|0|0	0|0|0	0|0|0	0|0|0	0|0|0	0|0|0	0|0|0	0|0|0	0|0|0	0|0|0	0|0|0	0|0|0	0|0|0	0|0|0	0|0|0	0|0|0	0|0|0	0|0|0	0|0|0	0|0|0	0|0|0	0|0|0	0|0|0	0|0|0	0|0|0	0|0|0	0|0|0	0|0|0	0|0|0	0|0|0	0|0|0	0|0|0	0|0|0	0|0|0	0|0|0	0|0|0
95	0|0|0	0|0|0	0|0|0	0|0|0	0|0|0	0|0|0	0|0|0	0|0|0	0|0|0	0|0|0	0|0|0	0|0|0	0|0|0	0|0|0	0|0|0	0|0|0	0|0|0	0|0|0	0|0|0	0|0|0	0|0|0	0|0|0	0|0|0	0|0|0	0|0|0	0|0|0	0|0|0	0|0|0	0|0|0	0|0|0	0|0|0	0|0|0	0|0|0	0|0|0	0|0|0	0|0|0	0|0|0	0|0|0	0|0|0	0|0|0	0|0|0	0|0|0	0|0|0	0|0|0	0|0|0	0|0|0	0|0|0	0|0|0	0|0|0
96	0|0|0	0|0|0	0|0|0	0|0|0	0|0|0	0|0|0	0|0|0	0|0|0	0|0|0	0|0|0	0|0|0	0|0|0	0|0|0	0|0|0	0|0|0	0|0|0	0|0|0	0|0|0	0|0|0	0|0|0	0|0|0	0|0|0	0|0|0	0|0|0	0|0|0	0|0|0	0|0|0	0|0|0	0|0|0	0|0|0	0|0|0	0|0|0	0|0|0	0|0|0	0|0|0	0|0|0	0|0|0	0|0|0	0|0|0	0|0|0	0|0|0	0|0|0	0|0|0	0|0|0	0|0|0	0|0|0	0|0|0	0|0|0	0|0|0
97	0|0|0	0|0|0	0|0|0	0|0|0	0|0|0	0|0|0	0|0|0	0|0|0	0|0|0	0|0|0	0|0|0	0|0|0	0|0|0	0|0|0	0|0|0	0|0|0	0|0|0	0|0|0	0|0|0	0|0|0	0|0|0	0|0|0	0|0|0	0|0|0	0|0|0	0|0|0	0|0|0	0|0|0	0|0|0	0|0|0	0|0|0	0|0|0	0|0|0	0|0|0	0|0|0	0|0|0	0|0|0	0|0|0	0|0|0	0|0|0	0|0|0	0|0|0	0|0|0	0|0|0	0|0|0	0|0|0	0|0|0	0|0|0	0|0|0
98	0|0|0	0|0|0	0|0|0	0|0|0	0|0|0	0|0|0	0|0|0	0|0|0	0|0|0	0|0|0	0|0|0	0|0|0	0|0|0	0|0|0	0|0|0	0|0|0	0|0|0	0|0|0	0|0|0	0|0|0	0|0|0	0|0|0	0|0|0	0|0|0	0|0|0	0|0|0	0|0|0	0|0|0	0|0|0	0|0|0	0|0|0	0|0|0	0|0|0	0|0|0	0|0|0	0|0|0	0|0|0	0|0|0	0|0|0	0|0|0	0|0|0	0|0|0	0|0|0	0|0|0	0|0|0	0|0|0	0|0|0	0|0|0	0|0|0
99	0|0|0	0|0|0	0|0|0	0|0|0	0|0|0	0|0|0	0|0|0	0|0|0	0|0|0	0|0|0	0|0|0	0|0|0	0|0|0	0|0|0	0|0|0	0|0|0	0|0|0	0|0|0	0|0|0	0|0|0	0|0|0	0|0|0	0|0|0	0|0|0	0|0|0	0|0|0	0|0|0	0|0|0	0|0|0	0|0|0	0|0|0	0|0|0	0|0|0	0|0|0	0|0|0	0|0|0	0|0|0	0|0|0	0|0|0	0|0|0	0|0|0	0|0|0	0|0|0	0|0|0	0|0|0	0|0|0	0|0|0	0|0|0	0|0|0
100	0|0|0	0|0|0	0|0|0	0|0|0	0|0|0	0|0|0	0|0|0	0|0|0	0|0|0	0|0|0	0|0|0	0|0|0	0|0|0	0|0|0	0|0|0	0|0|0	0|0|0	0|0|0	0|0|0	0|0|0	0|0|0	0|0|0	0|0|0	0|0|0	0|0|0	0|0|0	0|0|0	0|0|0	0|0|0	0|0|0	0|0|0	0|0|0	0|0|0	0|0|0	0|0|0	0|0|0	0|0|0	0|0|0	0|0|0	0|0|0	0|0|0	0|0|0	0|0|0	0|0|0	0|0|0	0|0|0	0|0|0	0|0|0	0|0|0
101	0|0|0	0|0|0	0|0|0	0|0|0	0|0|0	0|0|0	0|0|0	0|0|0	0|0|0	0|0|0	0|0|0	0|0|0	0|0|0	0|0|0	0|0|0	0|0|0	0|0|0	0|0|0	0|0|0	0|0|0	0|0|0	0|0|0	0|0|0	0|0|0	0|0|0	0|0|0	0|0|0	0|0|0	0|0|0	0|0|0	0|0|0	0|0|0	0|0|0	0|0|0	0|0|0	0|0|0	0|0|0	0|0|0	0|0|0	0|0|0	0|0|0	0|0|0	0|0|0	0|0|0	0|0|0	0|0|0	0|0|0	0|0|0	0|0|0
102	0|0|0	0|0|0	0|0|0	0|0|0	0|0|0	0|0|0	0|0|0	0|0|0	0|0|0	0|0|0	0|0|0	0|0|0	0|0|0	0|0|0	0|0|0	0|0|0	0|0|0	0|0|0	0|0|0	0|0|0	0|0|0	0|0|0	0|0|0	0|0|0	0|0|0	0|0|0	0|0|0	0|0|0	0|0|0	0|0|0	0|0|0	0|0|0	0|0|0	0|0|0	0|0|0	0|0|0	0|0|0	0|0|0	0|0|0	0|0|0	0|0|0	0|0|0	0|0|0	0|0|0	0|0|0	0|0|0	0|0|0	0|0|0	0|0|0
103	0|0|0	0|0|0	0|0|0	0|0|0	0|0|0	0|0|0	0|0|0	0|0|0	0|0|0	0|0|0	0|0|0	0|0|0	0|0|0	0|0|0	0|0|0	0|0|0	0|0|0	0|0|0	0|0|0	0|0|0	0|0|0	0|0|0	0|0|0	0|0|0	0|0|0	0|0|0	0|0|0	0|0|0	0|0|0	0|0|0	0|0|0	0|0|0	0|0|0	0|0|0	0|0|0	0|0|0	0|0|0	0|0|0	0|0|0	0|0|0	0|0|0	0|0|0	0|0|0	0|0|0	0|0|0	0|0|0	0|0|0	0|0|0	0|0|0
104	0|0|0	0|0|0	0|0|0	0|0|0	0|0|0	0|0|0	0|0|0	0|0|0	0|0|0	0|0|0	0|0|0	0|0|0	0|0|0	0|0|0	0|0|0	0|0|0	0|0|0	0|0|0	0|0|0	0|0|0	0|0|0	0|0|0	0|0|0	0|0|0	0|0|0	0|0|0	0|0|0	0|0|0	0|0|0	0|0|0	0|0|0	0|0|0	0|0|0	0|0|0	0|0|0	0|0|0	0|0|0	0|0|0	0|0|0	0|0|0	0|0|0	0|0|0	0|0|0	0|0|0	0|0|0	0|0|0	0|0|0	0|0|0	0|0|0
105	0|0|0	0|0|0	0|0|0	0|0|0	0|0|0	0|0|0	0|0|0	0|0|0	0|0|0	0|0|0	0|0|0	0|0|0	0|0|0	0|0|0	0|0|0	0|0|0	0|0|0	0|0|0	0|0|0	0|0|0	0|0|0	0|0|0	0|0|0	0|0|0	0|0|0	0|0|0	0|0|0	0|0|0	0|0|0	0|0|0	0|0|0	0|0|0	0|0|0	0|0|0	0|0|0	0|0|0	0|0|0	0|0|0	0|0|0	0|0|0	0|0|0	0|0|0	0|0|0	0|0|0	0|0|0	0|0|0	0|0|0	0|0|0	0|0|0
106	0|0|0	0|0|0	0|0|0	0|0|0	0|0|0	0|0|0	0|0|0	0|0|0	0|0|0	0|0|0	0|0|0	0|0|0	0|0|0	0|0|0	0|0|0	0|0|0	0|0|0	0|0|0	0|0|0	0|0|0	0|0|0	0|0|0	0|0|0	0|0|0	0|0|0	0|0|0	0|0|0	0|0|0	0|0|0	0|0|0	0|0|0	0|0|0	0|0|0	0|0|0	0|0|0	0|0|0	0|0|0	0|0|0	0|0|0	0|0|0	0|0|0	0|0|0	0|0|0	0|0|0	0|0|0	0|0|0	0|0|0	0|0|0	0|0|0
107	0|0|0	0|0|0	0|0|0	0|0|0	0|0|0	0|0|0	0|0|0	0|0|0	0|0|0	0|0|0	0|0|0	0|0|0	0|0|0	0|0|0	0|0|0	0|0|0	0|0|0	0|0|0	0|0|0	0|0|0	0|0|0	0|0|0	0|0|0	0|0|0	0|0|0	0|0|0	0|0|0	0|0|0	0|0|0	0|0|0	0|0|0	0|0|0	0|0|0	0|0|0	0|0|0	0|0|0	0|0|0	0|0|0	0|0|0	0|0|0	0|0|0	0|0|0	0|0|0	0|0|0	0|0|0	0|0|0	0|0|0	0|0|0	0|0|0
108	0|0|0	0|0|0	0|0|0	0|0|0	0|0|0	0|0|0	0|0|0	0|0|0	0|0|0	0|0|0	0|0|0	0|0|0	0|0|0	0|0|0	0|0|0	0|0|0	0|0|0	0|0|0	0|0|0	0|0|0	0|0|0	0|0|0	0|0|0	0|0|0	0|0|0	0|0|0	0|0|0	0|0|0	0|0|0	0|0|0	0|0|0	0|0|0	0|0|0	0|0|0	0|0|0	0|0|0	0|0|0	0|0|0	0|0|0	0|0|0	0|0|0	0|0|0	0|0|0	0|0|0	0|0|0	0|0|0	0|0|0	0|0|0	0|0|0
109	0|0|0	0|0|0	0|0|0	0|0|0	0|0|0	0|0|0	0|0|0	0|0|0	0|0|0	0|0|0	0|0|0	0|0|0	0|0|0	0|0|0	0|0|0	0|0|0	0|0|0	0|0|0	0|0|0	0|0|0	0|0|0	0|0|0	0|0|0	0|0|0	0|0|0	0|0|0	0|0|0	0|0|0	0|0|0	0|0|0	0|0|0	0|0|0	0|0|0	0|0|0	0|0|0	0|0|0	0|0|0	0|0|0	0|0|0	0|0|0	0|0|0	0|0|0	0|0|0	0|0|0	0|0|0	0|0|0	0|0|0	0|0|0	0|0|0
110	0|0|0	0|0|0	0|0|0	0|0|0	0|0|0	0|0|0	0|0|0	0|0|0	0|0|0	0|0|0	0|0|0	0|0|0	0|0|0	0|0|0	0|0|0	0|0|0	0|0|0	0|0|0	0|0|0	0|0|0	0|0|0	0|0|0	0|0|0	0|0|0	0|0|0	0|0|0	0|0|0	0|0|0	0|0|0	0|0|0	0|0|0	0|0|0	0|0|0	0|0|0	0|0|0	0|0|0	0|0|0	0|0|0	0|0|0	0|0|0	0|0|0	0|0|0	0|0|0	0|0|0	0|0|0	0|0|0	0|0|0	0|0|0	0|0|0
111	0|0|0	0|0|0	0|0|0	0|0|0	0|0|0	0|0|0	0|0|0	0|0|0	0|0|0	0|0|0	0|0|0	0|0|0	0|0|0	0|0|0	0|0|0	0|0|0	0|0|0	0|0|0	0|0|0	0|0|0	0|0|0	0|0|0	0|0|0	0|0|0	0|0|0	0|0|0	0|0|0	0|0|0	0|0|0	0|0|0	0|0|0	0|0|0	0|0|0	0|0|0	0|0|0	0|0|0	0|0|0	0|0|0	0|0|0	0|0|0	0|0|0	0|0|0	0|0|0	0|0|0	0|0|0	0|0|0	0|0|0	0|0|0	0|0|0
112	0|0|0	0|0|0	0|0|0	0|0|0	0|0|0	0|0|0	0|0|0	0|0|0	0|0|0	0|0|0	0|0|0	0|0|0	0|0|0	0|0|0	0|0|0	0|0|0	0|0|0	0|0|0	0|0|0	0|0|0	0|0|0	0|0|0	0|0|0	0|0|0	0|0|0	0|0|0	0|0|0	0|0|0	0|0|0	0|0|0	0|0|0	0|0|0	0|0|0	0|0|0	0|0|0	0|0|0	0|0|0	0|0|0	0|0|0	0|0|0	0|0|0	0|0|0	0|0|0	0|0|0	0|0|0	0|0|0	0|0|0	0|0|0	0|0|0
113	0|0|0	0|0|0	0|0|0	0|0|0	0|0|0	0|0|0	0|0|0	0|0|0	0|0|0	0|0|0	0|0|0	0|0|0	0|0|0	0|0|0	0|0|0	0|0|0	0|0|0	0|0|0	0|0|0	0|0|0	0|0|0	0|0|0	0|0|0	0|0|0	0|0|0	0|0|0	0|0|0	0|0|0	0|0|0	0|0|0	0|0|0	0|0|0	0|0|0	0|0|0	0|0|0	0|0|0	0|0|0	0|0|0	0|0|0	0|0|0	0|0|0	0|0|0	0|0|0	0|0|0	0|0|0	0|0|0	0|0|0	0|0|0	0|0|0
114	0|0|0	0|0|0	0|0|0	0|0|0	0|0|0	0|0|0	0|0|0	0|0|0	0|0|0	0|0|0	0|0|0	0|0|0	0|0|0	0|0|0	0|0|0	0|0|0	0|0|0	0|0|0	0|0|0	0|0|0	0|0|0	0|0|0	0|0|0	0|0|0	0|0|0	0|0|0	0|0|0	0|0|0	0|0|0	0|0|0	0|0|0	0|0|0	0|0|0	0|0|0	0|0|0	0|0|0	0|0|0	0|0|0	0|0|0	0|0|0	0|0|0	0|0|0	0|0|0	0|0|0	0|0|0	0|0|0	0|0|0	0|0|0	0|0|0
115	0|0|0	0|0|0	0|0|0	0|0|0	0|0|0	0|0|0	0|0|0	0|0|0	0|0|0	0|0|0	0|0|0	0|0|0	0|0|0	0|0|0	0|0|0	0|0|0	0|0|0	0|0|0	0|0|0	0|0|0	0|0|0	0|0|0	0|0|0	0|0|0	0|0|0	0|0|0	0|0|0	0|0|0	0|0|0	0|0|0	0|0|0	0|0|0	0|0|0	0|0|0	0|0|0	0|0|0	0|0|0	0|0|0	0|0|0	0|0|0	0|0|0	0|0|0	0|0|0	0|0|0	0|0|0	0|0|0	0|0|0	0|0|0	0|0|0
116	0|0|0	0|0|0	0|0|0	0|0|0	0|0|0	0|0|0	0|0|0	0|0|0	0|0|0	0|0|0	0|0|0	0|0|0	0|0|0	0|0|0	0|0|0	0|0|0	0|0|0	0|0|0	0|0|0	0|0|0	0|0|0	0|0|0	0|0|0	0|0|0	0|0|0	0|0|0	0|0|0	0|0|0	0|0|0	0|0|0	0|0|0	0|0|0	0|0|0	0|0|0	0|0|0	0|0|0	0|0|0	0|0|0	0|0|0	0|0|0	0|0|0	0|0|0	0|0|0	0|0|0	0|0|0	0|0|0	0|0|0	0|0|0	0|0|0
117	0|0|0	0|0|0	0|0|0	0|0|0	0|0|0	0|0|0	0|0|0	0|0|0	0|0|0	0|0|0	0|0|0	0|0|0	0|0|0	0|0|0	0|0|0	0|0|0	0|0|0	0|0|0	0|0|0	0|0|0	0|0|0	0|0|0	0|0|0	0|0|0	0|0|0	0|0|0	0|0|0	0|0|0	0|0|0	0|0|0	0|0|0	0|0|0	0|0|0	0|0|0	0|0|0	0|0|0	0|0|0	0|0|0	0|0|0	0|0|0	0|0|0	0|0|0	0|0|0	0|0|0	0|0|0	0|0|0	0|0|0	0|0|0	0|0|0
118	0|0|0	0|0|0	0|0|0	0|0|0	0|0|0	0|0|0	0|0|0	0|0|0	0|0|0	0|0|0	0|0|0	0|0|0	0|0|0	0|0|0	0|0|0	0|0|0	0|0|0	0|0|0	0|0|0	0|0|0	0|0|0	0|0|0	0|0|0	0|0|0	0|0|0	0|0|0	0|0|0	0|0|0	0|0|0	0|0|0	0|0|0	0|0|0	0|0|0	0|0|0	0|0|0	0|0|0	0|0|0	0|0|0	0|0|0	0|0|0	0|0|0	0|0|0	0|0|0	0|0|0	0|0|0	0|0|0	0|0|0	0|0|0	0|0|0
119	0|0|0	0|0|0	0|0|0	0|0|0	0|0|0	0|0|0	0|0|0	0|0|0	0|0|0	0|0|0	0|0|0	0|0|0	0|0|0	0|0|0	0|0|0	0|0|0	0|0|0	0|0|0	0|0|0	0|0|0	0|0|0	0|0|0	0|0|0	0|0|0	0|0|0	0|0|0	0|0|0	0|0|0	0|0|0	0|0|0	0|0|0	0|0|0	0|0|0	0|0|0	0|0|0	0|0|0	0|0|0	0|0|0	0|0|0	0|0|0	0|0|0	0|0|0	0|0|0	0|0|0	0|0|0	0|0|0	0|0|0	0|0|0	0|0|0
120	0|0|0	0|0|0	0|0|0	0|0|0	0|0|0	0|0|0	0|0|0	0|0|0	0|0|0	0|0|0	0|0|0	0|0|0	0|0|0	0|0|0	0|0|0	0|0|0	0|0|0	0|0|0	0|0|0	0|0|0	0|0|0	0|0|0	0|0|0	0|0|0	0|0|0	0|0|0	0|0|0	0|0|0	0|0|0	0|0|0	0|0|0	0|0|0	0|0|0	0|0|0	0|0|0	0|0|0	0|0|0	0|0|0	0|0|0	0|0|0	0|0|0	0|0|0	0|0|0	0|0|0	0|0|0	0|0|0	0|0|0	0|0|0	0|0|0
Onset report:
Onset	VARCEL	PNC	MMR	DTAP	HIBV	IPV	DTAPHEPBIP	FLU3	HEPA	RV5	HBHEPB	UNK	HEP	DTP	OPV	DTAPIPVHIB	RV1	MEA	FLU(H1N1)	FLUN3	PNC13	6VAX-F	MNQ	FLUN4	FLU4	HPV9	RVX	MMRV	MEN	TDAP	COVID19	DTAPIPV	COVID19-2	DTPPVHBHPB	PNC15	DTPIHI	DTPPHIB	DTAPH	MNC	BCG	HEPAB	YF	FLUX	PPV	DTPHEP	RAB	PNC10	JEVX	DTPIPV
-1	10	20	24	12	31	5	5		7	16		9	9	1		7	23	1			41	15			1		4	3	10	1	14	3		1						2	2	1	13	11		1	2		6
0	2	19	3	4	17	6	3	3	3	11		4	5	6		2	4				23	15		1	2			1	1		2			1				1					1	3	1				2
1	2	10	4	5	28	8	9		1	9		1	11	1		2	10			1	23	6		1	1				2		3	5				1			1		1		1	1				1	2
2	4	6	6	3	6	3	4	1	5	5	1	1				3	2				9	5	1		1			1	1		3		1
3		5	1	3	4	4			3	5	1		5			6	4				7	2						1			1
4		1	3	3	1		2		1	5		1	1			4	4		1		9	2			2			1						1	1			1
5	2	2	2	2	5		1	1		3		2	2				2				5	1	1		1				1		2									1
6		1	2	2	2							1	3	1	1	1						1						2			1
7	1	1	3	2	2				2			1	1			2	1								2	1																					1
8	3	2	3	2	1	2		1	2	2						3					4	2									3
9		1		1	3	1	2			3			3			1	2				4	1
10										1			2			1					1						1				1	2	1				1
11		1	2		1		1		1	2						1	1				1			1							2	1
12		2	1	1		1				1	1		2			1	3				2	2	1		1			1			2	3
13	1	1											2			1	2				2	2			1						1
14		4		2	1	1				3	1	1				7	5				4	1
15	1	1	2							2						4	2				2										2
16		1			1		1			2			2			1	2				1								1		2
17		1		1	1	1				1			1			1	1				2	1
18									1	1							1				1	1									1
19	1	4		3	3	3				1																					1							1
20	1		1		1					1												2					1
21	1	2	1	2	2	2				1			1			1
22			1	1		1		1	2	1			1			1					1										2		1
23										1			1				1				1	1			1
24										1																																	1
25					1	1								1									1		1			1															1	1
26				1	1		1			1						2	2				4	1
27																															1
28		1	2						1								1				1	1																					1
29																				1
30		3		1	1	1	1			3			1				2				1	1
31					1
32					1		1			1
33
34		1		1		1				1	1																				1
35																															2
36
37		1		1		1				1	1		1			1					1
38			1
39		1
40		1								1
41
42		1			1		1			1
43																																								1
44
45		1			1		1			1
46
47
48		2			1		1			2												1
49										1											1	1
50				1	1					2
51
52		1					1																								1
53
54		1			1		1			1																					1
55
56
57		1			1				1													1										1
58		1		1						1	1																				1
59
60
61										1							1
62										1																					1
63					1		1										1				1
64
65
66
67
68
69		1					1			1
70
71
72
73		1		1		1				1	1
74
75
76
77													1			1					2	1									1
78																			1
79										1						1					1
80																					1	1
81
82
83										1			1
84
85
86
87										1		1
88			1										1
89
90
91
92
93
94
95
96
97
98		1
99
100
101
102
103
104
105
106																															1
107
108
109
110												1
111
112
113
114
115													1
116
117
118
119
120
Shots report:
Shots	VARCEL	PNC	MMR	DTAP	HIBV	IPV	DTAPHEPBIP	FLU3	HEPA	RV5	HBHEPB	UNK	HEP	DTP	OPV	DTAPIPVHIB	RV1	MEA	FLU(H1N1)	FLUN3	PNC13	6VAX-F	MNQ	FLUN4	FLU4	HPV9	RVX	MMRV	MEN	TDAP	COVID19	DTAPIPV	COVID19-2	DTPPVHBHPB	PNC15	DTPIHI	DTPPHIB	DTAPH	MNC	BCG	HEPAB	YF	FLUX	PPV	DTPHEP	RAB	PNC10	JEVX	DTPIPV
1	7	30	29	6	18	7		3	13	21		7	24	1		6	26	1	2	2	29	1	2	3	10		1	2	3	1	50	3	2				1			3	2	1	8	5		1
2	8	17	18	13	12	8	4	3	11	11		5	4	1		19	12				37	35			3	1	4	4	7		2	5		2		1		2		2	1		6	2			2	1	1
3	5	24	9	13	37	7	11	1	2	30		2	4	6	1	20	22				54	30	1					4	3			2		1	1			1						5	1		1		8
4	3	23	5	12	41	7	26		2	28	1	4	16	1		8	15				26	2			1		1	1	3		1		1										2	2
5	6	11	2	12	15	13			2	13	7	2	8	1		2	4				13		1									5												1					1
6	1	2		1	3	2				1		2	2	1							1																		1				1
7	1		1									1																															1	1
8
9
10
11
12
13
14
15
16
17
18
19
20
21
22
23
24
25
Shots frequency report: count|total|frequency/100K
Shots	VARCEL	PNC	MMR	DTAP	HIBV	IPV	DTAPHEPBIP	FLU3	HEPA	RV5	HBHEPB	UNK	HEP	DTP	OPV	DTAPIPVHIB	RV1	MEA	FLU(H1N1)	FLUN3	PNC13	6VAX-F	MNQ	FLUN4	FLU4	HPV9	RVX	MMRV	MEN	TDAP	COVID19	DTAPIPV	COVID19-2	DTPPVHBHPB	PNC15	DTPIHI	DTPPHIB	DTAPH	MNC	BCG	HEPAB	YF	FLUX	PPV	DTPHEP	RAB	PNC10	JEVX	DTPIPV
1	7|41464|16	30|4209|712	29|27856|104	6|10968|54	18|7037|255	7|2382|293	|0|0	3|71593|4	13|13671|95	21|12123|173	|0|0	7|17959|38	24|44058|54	1|2968|33	|0|0	6|2618|229	26|4358|596	1|522|191	2|7718|25	2|5257|38	29|14421|201	1|190|526	2|9486|21	3|3923|76	10|32190|31	|0|0	1|544|183	2|10302|19	3|1667|179	1|21511|4	50|1496895|3	3|4062|73	2|34155|5	|0|0	|0|0	|0|0	1|21|4761	|0|0	|0|0	3|296|1013	2|3817|52	1|1678|59	8|24450|32	5|43087|11	|0|0	1|4784|20	|0|0	|0|0	|0|0
2	8|14775|54	17|4346|391	18|17184|104	13|11631|111	12|8868|135	8|5543|144	4|1385|288	3|18627|16	11|9489|115	11|1324|830	|0|0	5|9343|53	4|8402|47	1|5822|17	|0|0	19|2449|775	12|985|1218	|0|0	|0|0	|0|0	37|8816|419	35|2883|1214	|0|0	|0|0	3|9941|30	1|2694|37	4|358|1117	4|5510|72	7|1619|432	|0|0	2|59519|3	5|4326|115	|0|0	2|234|854	|0|0	1|119|840	|0|0	2|226|884	|0|0	2|219|913	1|1167|85	|0|0	6|7595|78	2|22442|8	|0|0	|0|0	2|267|749	1|55|1818	1|202|495
3	5|12607|39	24|7358|326	9|23866|37	13|20667|62	37|19950|185	7|16897|41	11|3807|288	1|3557|28	2|8625|23	30|4046|741	|0|0	2|1736|115	4|8166|48	6|10657|56	1|12931|7	20|3911|511	22|2129|1033	|0|0	|0|0	|0|0	54|7967|677	30|2277|1317	1|6676|14	|0|0	|0|0	|0|0	|0|0	4|2974|134	3|998|300	|0|0	|0|0	2|3180|62	|0|0	1|250|400	1|85|1176	|0|0	|0|0	1|266|375	|0|0	|0|0	|0|0	|0|0	|0|0	5|3435|145	1|44|2272	|0|0	1|371|269	|0|0	8|229|3493
4	3|11003|27	23|9431|243	5|15024|33	12|15131|79	41|18134|226	7|13726|50	26|5261|494	|0|0	2|7738|25	28|5767|485	1|2291|43	4|819|488	16|9379|170	1|4462|22	|0|0	8|2776|288	15|2508|598	|0|0	|0|0	|0|0	26|7864|330	2|325|615	|0|0	|0|0	1|1384|72	|0|0	1|442|226	1|1330|75	3|510|588	|0|0	1|1587|63	|0|0	1|329|303	|0|0	|0|0	|0|0	|0|0	|0|0	|0|0	|0|0	|0|0	|0|0	2|553|361	2|1248|160	|0|0	|0|0	|0|0	|0|0	|0|0
5	6|3798|157	11|2557|430	2|3952|50	12|4402|272	15|4499|333	13|4360|298	|0|0	|0|0	2|2841|70	13|1447|898	7|512|1367	2|348|574	8|2960|270	1|348|287	|0|0	2|448|446	4|503|795	|0|0	|0|0	|0|0	13|1915|678	|0|0	1|860|116	|0|0	|0|0	|0|0	|0|0	|0|0	|0|0	|0|0	|0|0	5|397|1259	|0|0	|0|0	|0|0	|0|0	|0|0	|0|0	|0|0	|0|0	|0|0	|0|0	|0|0	1|636|157	|0|0	|0|0	|0|0	|0|0	1|91|1098
6	1|1124|88	2|503|397	|0|0	1|986|101	3|1198|250	2|1097|182	|0|0	|0|0	|0|0	1|260|384	|0|0	2|132|1515	2|999|200	1|86|1162	|0|0	|0|0	|0|0	|0|0	|0|0	|0|0	1|597|167	|0|0	|0|0	|0|0	|0|0	|0|0	|0|0	|0|0	|0|0	|0|0	|0|0	|0|0	|0|0	|0|0	|0|0	|0|0	|0|0	|0|0	1|2|50000	|0|0	|0|0	|0|0	1|91|1098	|0|0	|0|0	|0|0	|0|0	|0|0	|0|0
7	1|252|396	|0|0	1|301|332	|0|0	|0|0	|0|0	|0|0	|0|0	|0|0	|0|0	|0|0	1|73|1369	|0|0	|0|0	|0|0	|0|0	|0|0	|0|0	|0|0	|0|0	|0|0	|0|0	|0|0	|0|0	|0|0	|0|0	|0|0	|0|0	|0|0	|0|0	|0|0	|0|0	|0|0	|0|0	|0|0	|0|0	|0|0	|0|0	|0|0	|0|0	|0|0	|0|0	1|43|2325	1|66|1515	|0|0	|0|0	|0|0	|0|0	|0|0
8	|0|0	|0|0	|0|0	|0|0	|0|0	|0|0	|0|0	|0|0	|0|0	|0|0	|0|0	|0|0	|0|0	|0|0	|0|0	|0|0	|0|0	|0|0	|0|0	|0|0	|0|0	|0|0	|0|0	|0|0	|0|0	|0|0	|0|0	|0|0	|0|0	|0|0	|0|0	|0|0	|0|0	|0|0	|0|0	|0|0	|0|0	|0|0	|0|0	|0|0	|0|0	|0|0	|0|0	|0|0	|0|0	|0|0	|0|0	|0|0	|0|0
9	|0|0	|0|0	|0|0	|0|0	|0|0	|0|0	|0|0	|0|0	|0|0	|0|0	|0|0	|0|0	|0|0	|0|0	|0|0	|0|0	|0|0	|0|0	|0|0	|0|0	|0|0	|0|0	|0|0	|0|0	|0|0	|0|0	|0|0	|0|0	|0|0	|0|0	|0|0	|0|0	|0|0	|0|0	|0|0	|0|0	|0|0	|0|0	|0|0	|0|0	|0|0	|0|0	|0|0	|0|0	|0|0	|0|0	|0|0	|0|0	|0|0
10	|0|0	|0|0	|0|0	|0|0	|0|0	|0|0	|0|0	|0|0	|0|0	|0|0	|0|0	|0|0	|0|0	|0|0	|0|0	|0|0	|0|0	|0|0	|0|0	|0|0	|0|0	|0|0	|0|0	|0|0	|0|0	|0|0	|0|0	|0|0	|0|0	|0|0	|0|0	|0|0	|0|0	|0|0	|0|0	|0|0	|0|0	|0|0	|0|0	|0|0	|0|0	|0|0	|0|0	|0|0	|0|0	|0|0	|0|0	|0|0	|0|0
11	|0|0	|0|0	|0|0	|0|0	|0|0	|0|0	|0|0	|0|0	|0|0	|0|0	|0|0	|0|0	|0|0	|0|0	|0|0	|0|0	|0|0	|0|0	|0|0	|0|0	|0|0	|0|0	|0|0	|0|0	|0|0	|0|0	|0|0	|0|0	|0|0	|0|0	|0|0	|0|0	|0|0	|0|0	|0|0	|0|0	|0|0	|0|0	|0|0	|0|0	|0|0	|0|0	|0|0	|0|0	|0|0	|0|0	|0|0	|0|0	|0|0
12	|0|0	|0|0	|0|0	|0|0	|0|0	|0|0	|0|0	|0|0	|0|0	|0|0	|0|0	|0|0	|0|0	|0|0	|0|0	|0|0	|0|0	|0|0	|0|0	|0|0	|0|0	|0|0	|0|0	|0|0	|0|0	|0|0	|0|0	|0|0	|0|0	|0|0	|0|0	|0|0	|0|0	|0|0	|0|0	|0|0	|0|0	|0|0	|0|0	|0|0	|0|0	|0|0	|0|0	|0|0	|0|0	|0|0	|0|0	|0|0	|0|0
13	|0|0	|0|0	|0|0	|0|0	|0|0	|0|0	|0|0	|0|0	|0|0	|0|0	|0|0	|0|0	|0|0	|0|0	|0|0	|0|0	|0|0	|0|0	|0|0	|0|0	|0|0	|0|0	|0|0	|0|0	|0|0	|0|0	|0|0	|0|0	|0|0	|0|0	|0|0	|0|0	|0|0	|0|0	|0|0	|0|0	|0|0	|0|0	|0|0	|0|0	|0|0	|0|0	|0|0	|0|0	|0|0	|0|0	|0|0	|0|0	|0|0
14	|0|0	|0|0	|0|0	|0|0	|0|0	|0|0	|0|0	|0|0	|0|0	|0|0	|0|0	|0|0	|0|0	|0|0	|0|0	|0|0	|0|0	|0|0	|0|0	|0|0	|0|0	|0|0	|0|0	|0|0	|0|0	|0|0	|0|0	|0|0	|0|0	|0|0	|0|0	|0|0	|0|0	|0|0	|0|0	|0|0	|0|0	|0|0	|0|0	|0|0	|0|0	|0|0	|0|0	|0|0	|0|0	|0|0	|0|0	|0|0	|0|0
15	|0|0	|0|0	|0|0	|0|0	|0|0	|0|0	|0|0	|0|0	|0|0	|0|0	|0|0	|0|0	|0|0	|0|0	|0|0	|0|0	|0|0	|0|0	|0|0	|0|0	|0|0	|0|0	|0|0	|0|0	|0|0	|0|0	|0|0	|0|0	|0|0	|0|0	|0|0	|0|0	|0|0	|0|0	|0|0	|0|0	|0|0	|0|0	|0|0	|0|0	|0|0	|0|0	|0|0	|0|0	|0|0	|0|0	|0|0	|0|0	|0|0
16	|0|0	|0|0	|0|0	|0|0	|0|0	|0|0	|0|0	|0|0	|0|0	|0|0	|0|0	|0|0	|0|0	|0|0	|0|0	|0|0	|0|0	|0|0	|0|0	|0|0	|0|0	|0|0	|0|0	|0|0	|0|0	|0|0	|0|0	|0|0	|0|0	|0|0	|0|0	|0|0	|0|0	|0|0	|0|0	|0|0	|0|0	|0|0	|0|0	|0|0	|0|0	|0|0	|0|0	|0|0	|0|0	|0|0	|0|0	|0|0	|0|0
17	|0|0	|0|0	|0|0	|0|0	|0|0	|0|0	|0|0	|0|0	|0|0	|0|0	|0|0	|0|0	|0|0	|0|0	|0|0	|0|0	|0|0	|0|0	|0|0	|0|0	|0|0	|0|0	|0|0	|0|0	|0|0	|0|0	|0|0	|0|0	|0|0	|0|0	|0|0	|0|0	|0|0	|0|0	|0|0	|0|0	|0|0	|0|0	|0|0	|0|0	|0|0	|0|0	|0|0	|0|0	|0|0	|0|0	|0|0	|0|0	|0|0
18	|0|0	|0|0	|0|0	|0|0	|0|0	|0|0	|0|0	|0|0	|0|0	|0|0	|0|0	|0|0	|0|0	|0|0	|0|0	|0|0	|0|0	|0|0	|0|0	|0|0	|0|0	|0|0	|0|0	|0|0	|0|0	|0|0	|0|0	|0|0	|0|0	|0|0	|0|0	|0|0	|0|0	|0|0	|0|0	|0|0	|0|0	|0|0	|0|0	|0|0	|0|0	|0|0	|0|0	|0|0	|0|0	|0|0	|0|0	|0|0	|0|0
19	|0|0	|0|0	|0|0	|0|0	|0|0	|0|0	|0|0	|0|0	|0|0	|0|0	|0|0	|0|0	|0|0	|0|0	|0|0	|0|0	|0|0	|0|0	|0|0	|0|0	|0|0	|0|0	|0|0	|0|0	|0|0	|0|0	|0|0	|0|0	|0|0	|0|0	|0|0	|0|0	|0|0	|0|0	|0|0	|0|0	|0|0	|0|0	|0|0	|0|0	|0|0	|0|0	|0|0	|0|0	|0|0	|0|0	|0|0	|0|0	|0|0
20	|0|0	|0|0	|0|0	|0|0	|0|0	|0|0	|0|0	|0|0	|0|0	|0|0	|0|0	|0|0	|0|0	|0|0	|0|0	|0|0	|0|0	|0|0	|0|0	|0|0	|0|0	|0|0	|0|0	|0|0	|0|0	|0|0	|0|0	|0|0	|0|0	|0|0	|0|0	|0|0	|0|0	|0|0	|0|0	|0|0	|0|0	|0|0	|0|0	|0|0	|0|0	|0|0	|0|0	|0|0	|0|0	|0|0	|0|0	|0|0	|0|0
21	|0|0	|0|0	|0|0	|0|0	|0|0	|0|0	|0|0	|0|0	|0|0	|0|0	|0|0	|0|0	|0|0	|0|0	|0|0	|0|0	|0|0	|0|0	|0|0	|0|0	|0|0	|0|0	|0|0	|0|0	|0|0	|0|0	|0|0	|0|0	|0|0	|0|0	|0|0	|0|0	|0|0	|0|0	|0|0	|0|0	|0|0	|0|0	|0|0	|0|0	|0|0	|0|0	|0|0	|0|0	|0|0	|0|0	|0|0	|0|0	|0|0
22	|0|0	|0|0	|0|0	|0|0	|0|0	|0|0	|0|0	|0|0	|0|0	|0|0	|0|0	|0|0	|0|0	|0|0	|0|0	|0|0	|0|0	|0|0	|0|0	|0|0	|0|0	|0|0	|0|0	|0|0	|0|0	|0|0	|0|0	|0|0	|0|0	|0|0	|0|0	|0|0	|0|0	|0|0	|0|0	|0|0	|0|0	|0|0	|0|0	|0|0	|0|0	|0|0	|0|0	|0|0	|0|0	|0|0	|0|0	|0|0	|0|0
23	|0|0	|0|0	|0|0	|0|0	|0|0	|0|0	|0|0	|0|0	|0|0	|0|0	|0|0	|0|0	|0|0	|0|0	|0|0	|0|0	|0|0	|0|0	|0|0	|0|0	|0|0	|0|0	|0|0	|0|0	|0|0	|0|0	|0|0	|0|0	|0|0	|0|0	|0|0	|0|0	|0|0	|0|0	|0|0	|0|0	|0|0	|0|0	|0|0	|0|0	|0|0	|0|0	|0|0	|0|0	|0|0	|0|0	|0|0	|0|0	|0|0
24	|0|0	|0|0	|0|0	|0|0	|0|0	|0|0	|0|0	|0|0	|0|0	|0|0	|0|0	|0|0	|0|0	|0|0	|0|0	|0|0	|0|0	|0|0	|0|0	|0|0	|0|0	|0|0	|0|0	|0|0	|0|0	|0|0	|0|0	|0|0	|0|0	|0|0	|0|0	|0|0	|0|0	|0|0	|0|0	|0|0	|0|0	|0|0	|0|0	|0|0	|0|0	|0|0	|0|0	|0|0	|0|0	|0|0	|0|0	|0|0	|0|0
25	|0|0	|0|0	|0|0	|0|0	|0|0	|0|0	|0|0	|0|0	|0|0	|0|0	|0|0	|0|0	|0|0	|0|0	|0|0	|0|0	|0|0	|0|0	|0|0	|0|0	|0|0	|0|0	|0|0	|0|0	|0|0	|0|0	|0|0	|0|0	|0|0	|0|0	|0|0	|0|0	|0|0	|0|0	|0|0	|0|0	|0|0	|0|0	|0|0	|0|0	|0|0	|0|0	|0|0	|0|0	|0|0	|0|0	|0|0	|0|0	|0|0
Details report:
VAERS ID	Vaccine Code	Vaccine Name	Vax lot	Vax series	Vax route	Age	Gender	Onset
165158	VARCEL	VARICELLA (VARIVAX)	1136K	1	SC	3.9	F	13
168704	PNC	PNEUMO (PREVNAR)		UNK	IM	2	U	2
175658	MMR	MEASLES + MUMPS + RUBELLA (MMR II)		UNK	SC	1	U
175658	VARCEL	VARICELLA (VARIVAX)		UNK	SC	1	U
201572	DTAP	DTAP (DAPTACEL)	C0813AA	2	IM	0.3	F	0
201572	HIBV	HIB (ACTHIB)	UA758AF	2	IM	0.3	F	0
201572	IPV	POLIO VIRUS, INACT. (POLIOVAX)	W013	2	IM	0.3	F	0
201572	PNC	PNEUMO (PREVNAR)	490532	2	IM	0.3	F	0
204863	MMR	MEASLES + MUMPS + RUBELLA (MMR II)		UNK			F
205631	MMR	MEASLES + MUMPS + RUBELLA (MMR II)	0060N	1	SC	1	M	2
205739	DTAPHEPBIP	DTAP + HEPB + IPV (PEDIARIX)	21883A2	1		0.25	F	2
205739	HIBV	HIB (PEDVAXHIB)	1170M	1		0.25	F	2
205739	PNC	PNEUMO (PREVNAR)	491179	1		0.25	F	2
219145	DTAP	DTAP (TRIPEDIA)	U0997AA	UNK		0.4	M	1
219145	HIBV	HIB (PEDVAXHIB)	645	UNK		0.4	M	1
219145	IPV	POLIO VIRUS, INACT. (IPOL)	W0022	UNK	IM	0.4	M	1
219145	PNC	PNEUMO (PREVNAR)	492856	UNK	IM	0.4	M	1
219630	DTAP	DTAP (INFANRIX)	630A2	5	IM	4	M	1
219630	IPV	POLIO VIRUS, INACT. (IPOL)	x0313	4	IM	4	M	1
219630	MMR	MEASLES + MUMPS + RUBELLA (MMR II)	0953N	2	SC	4	M	1
229203	MMR	MEASLES + MUMPS + RUBELLA (MMR II)		1	IM	0.97	F	2
229203	VARCEL	VARICELLA (VARIVAX)		1	IM	0.97	F	2
229294	FLU3	INFLUENZA (SEASONAL) (FLUZONE)	U1407AA	1	IM	1.04	F	8
230032	DTAPHEPBIP	DTAP + HEPB + IPV (PEDIARIX)	AC21A004AA	1		0.35	M	0
230032	HIBV	HIB (PEDVAXHIB)	0231P	1		0.35	M	0
234363	HEPA	HEP A (HAVRIX)	0153N	1	IM	2	F	18
238613	DTAPHEPBIP	DTAP + HEPB + IPV (PEDIARIX)	AC21A013AA	1		0.13	M	1
238613	HIBV	HIB (ACTHIB)	UE646AA	UNK		0.13	M	1
238613	PNC	PNEUMO (PREVNAR)	A94431C	1		0.13	M	1
245012	DTAPHEPBIP	DTAP + HEPB + IPV (PEDIARIX)	AC21A019AA	2	IM	0.36	F	1
245012	HIBV	HIB (ACTHIB)	UE468AA	2	IM	0.36	F	1
253812	MMR	MEASLES + MUMPS + RUBELLA (MMR II)		1	SC	1.3	M
260967	DTAPHEPBIP	DTAP + HEPB + IPV (PEDIARIX)	AC21B034AA	3	IM	0.49	F	1
260967	HIBV	HIB (ACTHIB)	764AB	3	IM	0.49	F	1
260967	PNC	PNEUMO (PREVNAR)	B08638F	4	IM	0.49	F	1
270074	MMR	MEASLES + MUMPS + RUBELLA (MMR II)	0378R	2	IM	4	F	21
277823	DTAPHEPBIP	DTAP + HEPB + IPV (PEDIARIX)	AC21B066AA	1	IM	0.16	F	0
277823	HIBV	HIB (PEDVAXHIB)	1124F	1	IM	0.16	F	0
277823	PNC	PNEUMO (PREVNAR)	B08691K	1	IM	0.16	F	0
277823	RV5	ROTAVIRUS (ROTATEQ)	0607F	1	PO	0.16	F	0
279257	DTAPHEPBIP	DTAP + HEPB + IPV (PEDIARIX)	AC21B097AB	1	IM	0.21	F	2
279257	HIBV	HIB (ACTHIB)	UE989AA	1	IM	0.21	F	2
279257	PNC	PNEUMO (PREVNAR)	B36258F	1	IM	0.21	F	2
279257	RV5	ROTAVIRUS (ROTATEQ)	1113F	1	PO	0.21	F	2
282302	DTAP	DTAP (DAPTACEL)	C2650AA	2	UN	0.3	M	12
282302	HBHEPB	HIB + HEP B (COMVAX)	0681F	2	UN	0.3	M	12
282302	IPV	POLIO VIRUS, INACT. (IPOL)	Z0326	2	UN	0.3	M	12
282302	PNC	PNEUMO (PREVNAR)	B08678K	2	UN	0.3	M	12
282302	RV5	ROTAVIRUS (ROTATEQ)	1237F	2	PO	0.3	M	12
282648	MMR	MEASLES + MUMPS + RUBELLA (MMR II)	0378R	2	UN	4	F	370
282650	MMR	MEASLES + MUMPS + RUBELLA (MMR II)		UNK	UN		F
283505	RV5	ROTAVIRUS (ROTATEQ)	1110F	3	PO	0.3	M	50
283526	DTAP	DTAP (DAPTACEL)	C2628AA	1		0.2	F	37
283526	HBHEPB	HIB + HEP B (COMVAX)	1158F	1		0.2	F	37
283526	IPV	POLIO VIRUS, INACT. (IPOL)	Z0527	1		0.2	F	37
283526	PNC	PNEUMO (PREVNAR)	B36258D	1		0.2	F	37
283526	RV5	ROTAVIRUS (ROTATEQ)	1232F	1	PO	0.2	F	37
283821	DTAP	DTAP (DAPTACEL)	c2628aa	1		0.2	M	2
283821	HBHEPB	HIB + HEP B (COMVAX)	1416f	1		0.2	M	2
283821	IPV	POLIO VIRUS, INACT. (IPOL)	z0548	1		0.2	M	2
283821	PNC	PNEUMO (PREVNAR)	b086848	1		0.2	M	2
283821	RV5	ROTAVIRUS (ROTATEQ)	0024U	1	PO	0.2	M	2
284080	DTAPHEPBIP	DTAP + HEPB + IPV (PEDIARIX)		3	IM	0.5	F	54
284080	HIBV	HIB (ACTHIB)	UF074AA	3	IM	0.5	F	54
284080	PNC	PNEUMO (PREVNAR)	B086790	3	IM	0.5	F	54
284080	RV5	ROTAVIRUS (ROTATEQ)		3	PO	0.5	F	54
284327	DTAPHEPBIP	DTAP + HEPB + IPV (PEDIARIX)	AC21B070BA	1	IM	0.2	M	30
284327	HIBV	HIB (ACTHIB)	UF013AA	1	IM	0.2	M	30
284327	PNC	PNEUMO (PREVNAR)	B08675H	1	IM	0.2	M	30
284327	RV5	ROTAVIRUS (ROTATEQ)	111F	1	PO	0.2	M	30
284712	DTAPHEPBIP	DTAP + HEPB + IPV (PEDIARIX)	AC21B090BA	2		0.3	M
284712	HIBV	HIB (PEDVAXHIB)	0074U	2		0.3	M
284712	PNC	PNEUMO (PREVNAR)	08690E	2		0.3	M
284712	RV5	ROTAVIRUS (ROTATEQ)	0504U	2	PO	0.3	M
284961	DTAP	DTAP (TRIPEDIA)	C2630AA	3	IM	0.5	M	14
284961	HIBV	HIB (PEDVAXHIB)	1015F	3	IM	0.5	M	14
284961	RV5	ROTAVIRUS (ROTATEQ)	1032F	3	PO	0.5	M	14
284961	UNK	VACCINE NOT SPECIFIED (NO BRAND NAME)	808683C	3	IM	0.5	M	14
287629	DTAPHEPBIP	DTAP + HEPB + IPV (PEDIARIX)	AC21B092AA	2	IM	0.5	M	2
287629	HIBV	HIB (PEDVAXHIB)	1275F	3	IM	0.5	M	2
287629	PNC	PNEUMO (PREVNAR)	B08684F	3	IM	0.5	M	2
287787	DTAP	DTAP (DAPTACEL)	U1985AB	1	UN	0.19	F	73
287787	HBHEPB	HIB + HEP B (COMVAX)	0507F	1	UN	0.19	F	73
287787	IPV	POLIO VIRUS, INACT. (IPOL)	Y1032	1	UN	0.19	F	73
287787	PNC	PNEUMO (PREVNAR)	B08692F	1	UN	0.19	F	73
287787	RV5	ROTAVIRUS (ROTATEQ)	0025U	1	PO	0.19	F	73
287898	DTAPHEPBIP	DTAP + HEPB + IPV (PEDIARIX)	AC21B090aA	3	IM	0.52	F	69
287898	PNC	PNEUMO (PREVNAR)	B08684B	3	IM	0.52	F	69
287898	RV5	ROTAVIRUS (ROTATEQ)	1239F	3	PO	0.52	F	69
289160	DTAP	DTAP (NO BRAND NAME)	C2605AA	UNK	UN	0.28	M	3
289160	HBHEPB	HIB + HEP B (COMVAX)	0197F	UNK	UN	0.28	M	3
289160	IPV	POLIO VIRUS, INACT. (NO BRAND NAME)	Y0824	UNK	UN	0.28	M	3
289160	PNC	PNEUMO (PREVNAR)	B47300A	UNK	UN	0.28	M	3
289160	RV5	ROTAVIRUS (ROTATEQ)	0022U	UNK	UN	0.28	M	3
289336	DTAPHEPBIP	DTAP + HEPB + IPV (PEDIARIX)	AC21B070BA	1	IM	0.17	F	42
289336	HIBV	HIB (ACTHIB)	UF014AA	1	IM	0.17	F	42
289336	PNC	PNEUMO (PREVNAR)	808691K	1	IM	0.17	F	42
289336	RV5	ROTAVIRUS (ROTATEQ)	0979F	UNK	PO	0.17	F	42
290090	HEP	HEP B (RECOMBIVAX HB)	1246F	3	IM	0.76	F	83
290766	DTAP	DTAP (DAPTACEL)	C2606AA	1	IM	0.17	F	50
290766	HIBV	HIB (ACTHIB)	UF112AA	1	IM	0.17	F	50
290766	RV5	ROTAVIRUS (ROTATEQ)	0237U	1	PO	0.17	F	50
291396	DTAPHEPBIP	DTAP + HEPB + IPV (PEDIARIX)		1	UN	0.18	M	32
291396	HIBV	HIB (NO BRAND NAME)		1	UN	0.18	M	32
291396	RV5	ROTAVIRUS (ROTATEQ)		1	PO	0.18	M	32
291606	DTAPHEPBIP	DTAP + HEPB + IPV (PEDIARIX)	AC21B114CA	2	IM	0.4	F	11
291606	HIBV	HIB (ACTHIB)	UF119AA	2	IM	0.4	F	11
291606	PNC	PNEUMO (PREVNAR)	B47300F	2	IM	0.4	F	11
291606	RV5	ROTAVIRUS (ROTATEQ)	0503U	2	PO	0.4	F	11
293071	DTAP	DTAP (TRIPEDIA)	U1986BB	2	IM	0.3	M	8
293071	HIBV	HIB (ACTHIB)	UF621AA	2	IM	0.3	M	8
293071	IPV	POLIO VIRUS, INACT. (IPOL)	20547	2	IM	0.3	M	8
293071	PNC	PNEUMO (PREVNAR)	808670K	2	IM	0.3	M	8
293071	RV5	ROTAVIRUS (ROTATEQ)	0036U	2	PO	0.3	M	8
293114	DTAP	DTAP (DAPTACEL)	U1985CA	1	IM	0.2	M	58
293114	HBHEPB	HIB + HEP B (COMVAX)	0984F	1	IM	0.2	M	58
293114	PNC	PNEUMO (PREVNAR)	B0866B	1	IM	0.2	M	58
293114	RV5	ROTAVIRUS (ROTATEQ)	1231F	1	PO	0.2	M	58
298106	DTAP	DTAP (DAPTACEL)	02570BA	2		0.3	M	21
298106	HIBV	HIB (ACTHIB)	UF091AA	2		0.3	M	21
298106	IPV	POLIO VIRUS, INACT. (IPOL)	Y103Z	1		0.3	M	21
298106	PNC	PNEUMO (PREVNAR)	B47442C	2		0.3	M	21
298106	RV5	ROTAVIRUS (ROTATEQ)	1231F	2	PO	0.3	M	21
298107	RV5	ROTAVIRUS (ROTATEQ)		2	PO	0.33	U
298108	DTAPHEPBIP	DTAP + HEPB + IPV (PEDIARIX)	AC21B115AA	3	IM	0.56	F	45
298108	HIBV	HIB (PEDVAXHIB)	0067U	3	IM	0.56	F	45
298108	PNC	PNEUMO (PREVNAR)	B08692U	3	IM	0.56	F	45
298108	RV5	ROTAVIRUS (ROTATEQ)	0508U	3	PO	0.56	F	45
300005	RV5	ROTAVIRUS (ROTATEQ)		1	PO	0.13	M	23
300128	RV5	ROTAVIRUS (ROTATEQ)		UNK	PO	0.25	U
297071	HEPA	HEP A (HAVRIX)	AHAV3172BA	1	IM	1.1	M	2
297071	MMR	MEASLES + MUMPS + RUBELLA (MMR II)	1410F	1	SC	1.1	M	2
297071	VARCEL	VARICELLA (VARIVAX)	1071U	1	SC	1.1	M	2
299560	DTAPHEPBIP	DTAP + HEPB + IPV (PEDIARIX)	AC21B115AA	1	UN	0.2	M	1
299560	HIBV	HIB (PEDVAXHIB)	0258U	1	UN	0.2	M	1
299560	PNC	PNEUMO (PREVNAR)	B08700C	1	UN	0.2	M	1
299560	RV5	ROTAVIRUS (ROTATEQ)	0508U	1	PO	0.2	M	1
301758	DTAPHEPBIP	DTAP + HEPB + IPV (PEDIARIX)	AC21B128AB	1		0.22	M	5
301758	HIBV	HIB (PEDVAXHIB)	1274F	1		0.22	M	5
301758	PNC	PNEUMO (PREVNAR)	B26510A	1		0.22	M	5
301758	RV5	ROTAVIRUS (ROTATEQ)	1129U	1	PO	0.22	M	5
305694	DTAP	DTAP (DAPTACEL)	C2760AA	2	IM	0.3	F	14
305694	HBHEPB	HIB + HEP B (COMVAX)	0222U	2	IM	0.3	F	14
305694	IPV	POLIO VIRUS, INACT. (IPOL)	A0169	2	IM	0.3	F	14
305694	PNC	PNEUMO (PREVNAR)	653981A	2	IM	0.3	F	14
305694	RV5	ROTAVIRUS (ROTATEQ)	0903U	2	PO	0.3	F	14
310322	DTAP	DTAP (TRIPEDIA)	C2628AA	1	IM	0.2	M	34
310322	HBHEPB	HIB + HEP B (COMVAX)	1416F	1	IM	0.2	M	34
310322	IPV	POLIO VIRUS, INACT. (IPOL)	Z0547	1	SC	0.2	M	34
310322	PNC	PNEUMO (PREVNAR)	B08690C	1	IM	0.2	M	34
310322	RV5	ROTAVIRUS (ROTATEQ)	0234U	1	IN	0.2	M	34
310323	DTAP	DTAP (NO BRAND NAME)		UNK	UN	0.19	M	30
310323	HEP	HEP B (NO BRAND NAME)		UNK	UN	0.19	M	30
310323	IPV	POLIO VIRUS, INACT. (NO BRAND NAME)		UNK	UN	0.19	M	30
310323	PNC	PNEUMO (PREVNAR)		UNK	UN	0.19	M	30
310323	RV5	ROTAVIRUS (ROTATEQ)	1389U	UNK	PO	0.19	M	30
312546	DTAPHEPBIP	DTAP + HEPB + IPV (PEDIARIX)	AC21B113AA	1	UN	0.2	M	48
312546	HIBV	HIB (ACTHIB)		1	UN	0.2	M	48
312546	PNC	PNEUMO (PREVNAR)	B70143T	1	UN	0.2	M	48
312546	RV5	ROTAVIRUS (ROTATEQ)	1128U	1	PO	0.2	M	48
312547	DTAP	DTAP (DAPTACEL)	C2807AA	3	UN	0.5	M	19
312547	HIBV	HIB (ACTHIB)	UF225AA	3	UN	0.5	M	19
312547	PNC	PNEUMO (PREVNAR)	B71016A	3	UN	0.5	M	19
312547	RV5	ROTAVIRUS (ROTATEQ)	1244U	3	PO	0.5	M	19
317308	DTP	DTP (NO BRAND NAME)	298913	5	IM	5	F	6
317308	MMR	MEASLES + MUMPS + RUBELLA (MMR II)	1699S	2	SC	5	F	6
317308	OPV	POLIO VIRUS, ORAL (ORIMUNE)	308954	4	PO	5	F	6
318713	HEP	HEP B (RECOMBIVAX HB)		2	UN	0.2	F	0
321915	DTAP	DTAP (TRIPEDIA)	U2397AA	4	ID	3	F	1
321915	MMR	MEASLES + MUMPS + RUBELLA (MMR II)	0666X	1	SC	3	F	1
332507	DTAPIPVHIB	DTAP + IPV + HIB (PENTACEL)	C3199AA	1	IM	0.2	M	13
332507	HEP	HEP B (FOREIGN)	1372V	2	IM	0.2	M	13
332507	PNC	PNEUMO (PREVNAR)	C80884	1	IM	0.2	M	13
332507	RV1	ROTAVIRUS (ROTARIX)	A41FA691A	1	PO	0.2	M	13
338895	HEP	HEP B (FOREIGN)	0627u	2	IM	0.79	M	6
340495	DTAPIPVHIB	DTAP + IPV + HIB (PENTACEL)	C3177AA/C2900AA	1	IM	0.18	F	3
340495	HEP	HEP B (RECOMBIVAX HB)	0378U	1	IM	0.18	F	3
340495	PNC	PNEUMO (PREVNAR)	C97890	1	IM	0.18	F	3
340495	RV5	ROTAVIRUS (ROTATEQ)	0274X	1	PO	0.18	F	3
341707	HIBV	HIB (PEDVAXHIB)		UNK	UN	6	F
342944	MEA	MEASLES (ATTENUVAX)		1	UN	3	M
347172	DTAP	DTAP (DAPTACEL)	C3082AA	5	UN	4	F	8
347172	IPV	POLIO VIRUS, INACT. (IPOL)	A0491	4	UN	4	F	8
347172	MMR	MEASLES + MUMPS + RUBELLA (MMR II)	1370X	2	UN	4	F	8
347172	VARCEL	VARICELLA (VARIVAX)	1401X	2	UN	4	F	8
349852	DTAPHEPBIP	DTAP + HEPB + IPV (PEDIARIX)	AC21B167AA	1	IM	0.2	M	52
349852	PNC	PNEUMO (PREVNAR)	C68309	1	IM	0.2	M	52
353314	DTAPIPVHIB	DTAP + IPV + HIB (PENTACEL)	C3293AA	2	IM	0.33	M	2
353314	PNC	PNEUMO (PREVNAR)	D46874	2	IM	0.33	M	2
353314	RV5	ROTAVIRUS (ROTATEQ)	1725x	2	PO	0.33	M	2
361528	DTAPHEPBIP	DTAP + HEPB + IPV (PEDIARIX)	AC21B096	1	IM	0.17	M	347
361528	HIBV	HIB (PEDVAXHIB)	U0067U	1	IM	0.17	M	347
361528	PNC	PNEUMO (PREVNAR)	B54015K	1	IM	0.17	M	347
361528	RV5	ROTAVIRUS (ROTATEQ)	0504U	1	PO	0.17	M	347
369684	FLU(H1N1)	INFLUENZA (H1N1) (H1N1 (MONOVALENT) (SANOFI))	UP010AA	1		4	M	4
379707	HEPA	HEP A (VAQTA)	1100Y	2	IJ	1.59	F	2
380481	DTAPIPVHIB	DTAP + IPV + HIB (PENTACEL)	C3481AA	UNK	IM	0.33	F	0
380481	PNC	PNEUMO (PREVNAR)	D92436	UNK	IM	0.33	F	0
380481	RV5	ROTAVIRUS (ROTATEQ)	1083Y	UNK	PO	0.33	F	0
383567	FLUN3	INFLUENZA (SEASONAL) (FLUMIST)	500737P	UNK	IN	2	M	29
383791	DTP	DTP (NO BRAND NAME)		2		0.25	M	0
384304	DTAP	DTAP (TRIPEDIA)	U3009BA	4	IM	1.28	F	5
384304	HIBV	HIB (ACTHIB)	U3009BA	4	IM	1.28	F	5
384304	MMR	MEASLES + MUMPS + RUBELLA (MMR II)	1060Y	1	IM	1.28	F	5
384304	PNC	PNEUMO (PREVNAR)	E37556	4	IM	1.28	F	5
385787	DTAPIPVHIB	DTAP + IPV + HIB (PENTACEL)	C3581AB	2	IM	0.37	F	0
385787	PNC	PNEUMO (PREVNAR)	E07298	2	IM	0.37	F	0
385787	RV5	ROTAVIRUS (ROTATEQ)	0613Y	2	PO	0.37	F	0
390859	PNC	PNEUMO (PREVNAR)	E51194	4	UN	1.03	M	3
394796	FLU(H1N1)	INFLUENZA (H1N1) (H1N1 (MONOVALENT) (SANOFI))	UF846AA	1	IM	1.88	F	78
395065	PNC13	PNEUMO (PREVNAR13)	E49135	1	IM	0.73	F	4
395496	DTAPHEPBIP	DTAP + HEPB + IPV (PEDIARIX)	AC21B248CA	3	IM	0.5	M	9
395496	HIBV	HIB (ACTHIB)	UH045AB	3	IM	0.5	M	9
395496	PNC13	PNEUMO (PREVNAR13)	E57642	2	IM	0.5	M	9
395496	RV5	ROTAVIRUS (ROTATEQ)	0510Z	UNK	PO	0.5	M	9
397024	DTAPIPVHIB	DTAP + IPV + HIB (PENTACEL)	C3601AA	UNK	IM	0.18	M	37
397024	HEP	HEP B (ENGERIX-B)	AHBVB736AB	2	IM	0.18	M	37
397024	PNC13	PNEUMO (PREVNAR13)	E47473	1	IM	0.18	M	37
402878	6VAX-F	DTAP+IPV+HEPB+HIB (INFANRIX HEXA)		UNK	UN	0.18	M	12
402878	MNQ	MENINGOCOCCAL CONJUGATE (MENVEO)	X79P45IT	1	UN	0.18	M	12
402878	PNC	PNEUMO (PREVNAR)		UNK	UN	0.18	M	12
407822	HEPA	HEP A (HAVRIX)	AHAVB444AA	2	UN	1.92	M	57
410317	FLUN3	INFLUENZA (SEASONAL) (FLUMIST)	501053P	UNK	IN	6	M	1
416059	DTAPHEPBIP	DTAP + HEPB + IPV (PEDIARIX)		2	IM	0.36	F	63
416059	HIBV	HIB (HIBERIX)		2	IM	0.36	F	63
416059	PNC13	PNEUMO (PREVNAR13)		2	IM	0.36	F	63
416059	RV1	ROTAVIRUS (ROTARIX)		2	PO	0.36	F	63
418248	HIBV	HIB (ACTHIB)	UF879AA	1	UN	1.03	M	20
418248	MMR	MEASLES + MUMPS + RUBELLA (MMR II)	0896Z	1	UN	1.03	M	20
418248	VARCEL	VARICELLA (VARIVAX)	0491Z	1	UN	1.03	M	20
421232	DTAPIPVHIB	DTAP + IPV + HIB (PENTACEL)	C3747AB	3	IM	1	M	8
421232	HEPA	HEP A (VAQTA)	1510Z	1	IM	1	M	8
421232	MMR	MEASLES + MUMPS + RUBELLA (MMR II)	0811Z	1	SC	1	M	8
421232	PNC13	PNEUMO (PREVNAR13)	E84462	4	IM	1	M	8
421232	VARCEL	VARICELLA (VARIVAX)	1044Z	1	SC	1	M	8
429078	DTAPHEPBIP	DTAP + HEPB + IPV (PEDIARIX)	AC21B248CA	1	IM	0.12	M	154
429078	HIBV	HIB (ACTHIB)	UH116AB	1	IM	0.12	M	154
429078	PNC	PNEUMO (PREVNAR)	914274	1	IM	0.12	M	154
429078	RV1	ROTAVIRUS (ROTARIX)	A41FB09A	1	PO	0.12	M	154
438855	PNC13	PNEUMO (PREVNAR13)	916006	1	IM	1.49	M	0
439734	DTAP	DTAP (TRIPEDIA)	U3282DA	4	IM	1.59	M	0
439734	FLU3	INFLUENZA (SEASONAL) (FLUZONE)	U4122CA	3	IM	1.59	M	0
455639	DTAPHEPBIP	DTAP + HEPB + IPV (PEDIARIX)	AC21B248CA	3	IM	0.5	M	9
455639	HIBV	HIB (ACTHIB)	UH045AB	3	IM	0.5	M	9
455639	PNC13	PNEUMO (PREVNAR13)	E57642	2	IM	0.5	M	9
455639	RV5	ROTAVIRUS (ROTATEQ)	0510Z	UNK	PO	0.5	M	9
462670	HIBV	HIB (ACTHIB)	UH521AA	1	IM	0.25	M	1
463314	RV5	ROTAVIRUS (ROTATEQ)		UNK	UN		U
463957	DTAPIPVHIB	DTAP + IPV + HIB (PENTACEL)	C4269AA	3	IM	0.51	M	1
463957	RV5	ROTAVIRUS (ROTATEQ)	1847AA	3	PO	0.51	M	1
464006	DTAPHEPBIP	DTAP + HEPB + IPV (PEDIARIX)	AC21B315AA	3	UN	0.53	M	2
464006	FLU3	INFLUENZA (SEASONAL) (FLUZONE)	U4197BA	1	UN	0.53	M	2
464006	HIBV	HIB (PEDVAXHIB)	0891AA	3	UN	0.53	M	2
464265	DTAPIPVHIB	DTAP + IPV + HIB (PENTACEL)	C4182AA	UNK	IM	0.17	M	3
464265	HEP	HEP B (RECOMBIVAX HB)	0020AE	UNK	IM	0.17	M	3
464265	PNC13	PNEUMO (PREVNAR13)	F53370	UNK	IM	0.17	M	3
464265	RV5	ROTAVIRUS (ROTATEQ)	0049AE	UNK	PO	0.17	M	3
482481	DTAP	DTAP (INFANRIX)	AC14B164AA	4	IM	1.46	M	7
482481	MMR	MEASLES + MUMPS + RUBELLA (MMR II)	H01242	1	SC	1.46	M	7
484154	DTAPIPVHIB	DTAP + IPV + HIB (PENTACEL)	C4372AA	3	IM	0.51	M	2
484154	PNC13	PNEUMO (PREVNAR13)	F11149	3	IM	0.51	M	2
484154	RV5	ROTAVIRUS (ROTATEQ)	H019492	3	PO	0.51	M	2
485927	HEP	HEP B (GENHEVAC B)	0386ae	3	IM	1.03	F	7
485927	HEPA	HEP A (HAVRIX)	ahavb657ab	1	IM	1.03	F	7
485927	MMR	MEASLES + MUMPS + RUBELLA (MMR II)	1450aa	1	SC	1.03	F	7
485927	VARCEL	VARICELLA (VARIVAX)	07b4aa	1	SC	1.03	F	7
488384	VARCEL	VARICELLA (VARIVAX)	1087y	1	SC	1.25	M	306
497245	DTAPIPVHIB	DTAP + IPV + HIB (PENTACEL)	C4359AA	UNK	IM	0.16	F	15
497245	PNC13	PNEUMO (PREVNAR13)	G75071	UNK	IM	0.16	F	15
497245	RV5	ROTAVIRUS (ROTATEQ)	H019650	UNK	PO	0.16	F	15
503892	FLUN4	INFLUENZA (SEASONAL) (FLUMIST QUADRIVALENT)		2	IN	3	F	0
508234	FLU4	INFLUENZA (SEASONAL) (FLUZONE QUADRIVALENT)	U4771AA	UNK	IM	3	F	12
521352	DTAPHEPBIP	DTAP + HEPB + IPV (PEDIARIX)	AC218406CA	2	IM	0.35	M	1
521352	HIBV	HIB (ACTHIB)	UH736AA	2	UN	0.35	M	1
521352	PNC13	PNEUMO (PREVNAR13)	918177	2	IM	0.35	M	1
564719	MMR	MEASLES + MUMPS + RUBELLA (MMR II)		UNK	UN	1	U
564719	VARCEL	VARICELLA (VARIVAX)		UNK	UN	1	U
575358	DTAPHEPBIP	DTAP + HEPB + IPV (PEDIARIX)	7J77Y	2	IM	0.22	M	26
575358	HIBV	HIB (PEDVAXHIB)	K006826	2	IM	0.22	M	26
575358	PNC13	PNEUMO (PREVNAR13)	H86675	2	IM	0.22	M	26
575358	RV5	ROTAVIRUS (ROTATEQ)	K004468	2	PO	0.22	M	26
614545	PNC13	PNEUMO (PREVNAR13)	J75276	3	IM	0.76	M	1
615649	DTAPHEPBIP	DTAP + HEPB + IPV (PEDIARIX)	lk94m	2	IM	0.33	M	1
615649	HIBV	HIB (PEDVAXHIB)	k009955	2	IM	0.33	M	1
615649	PNC13	PNEUMO (PREVNAR13)	j49847	2	IM	0.33	M	1
615649	RV1	ROTAVIRUS (ROTARIX)	a41fb465a	2	SYR	0.33	M	1
619432	FLU3	INFLUENZA (SEASONAL) (FLUZONE)	UI1515AA	UNK	IM	3	F	0
639813	DTAPIPVHIB	DTAP + IPV + HIB (NO BRAND NAME)	C3658AA	2	UN	0.32	M	14
639813	PNC13	PNEUMO (PREVNAR13)	E80082	2	UN	0.32	M	14
639813	RV5	ROTAVIRUS (ROTATEQ)	0201Z	2	UN	0.32	M	14
644500	PNC13	PNEUMO (PREVNAR13)		UNK	UN		F
650529	DTAPHEPBIP	DTAP + HEPB + IPV (PEDIARIX)	FY7FK	3	IM	0.58	F	1
650529	HIBV	HIB (ACTHIB)	UI508AA	3	IM	0.58	F	1
650529	PNC13	PNEUMO (PREVNAR13)	M77275	3	IM	0.58	F	1
650529	RV5	ROTAVIRUS (ROTATEQ)	L037574	3	PO	0.58	F	1
669709	DTAPHEPBIP	DTAP + HEPB + IPV (PEDIARIX)	M9L74	2	IM	0.33	F	4
669709	PNC13	PNEUMO (PREVNAR13)	N34937	2	IM	0.33	F	4
669709	RV1	ROTAVIRUS (ROTARIX)	A41FB568A	2	PO	0.33	F	4
671205	DTAPIPVHIB	DTAP + IPV + HIB (PENTACEL)	C5149AA	3	IM	0.5	M	4
671205	FLU4	INFLUENZA (SEASONAL) (FLUZONE QUADRIVALENT)	UT5583UA	1	IM	0.5	M	4
671205	PNC13	PNEUMO (PREVNAR13)	N97936	3	IM	0.5	M	4
671205	RV5	ROTAVIRUS (ROTATEQ)	M025572	3	PO	0.5	M	4
678705	FLU3	INFLUENZA (SEASONAL) (FLUZONE)	ut2191ja	3	IM	2	M	22
678705	HEPA	HEP A (VAQTA)	1213f	1	IM	2	M	22
705134	DTAPIPVHIB	DTAP + IPV + HIB (PENTACEL)	C4958AA	1	UN	0.17	M	10
705134	HEP	HEP B (RECOMBIVAX HB)	L019298	2	UN	0.17	M	10
705134	PNC13	PNEUMO (PREVNAR13)		1	UN	0.17	M	10
705134	RV5	ROTAVIRUS (ROTATEQ)	L010837	1	PO	0.17	M	10
714549	FLU4	INFLUENZA (SEASONAL) (FLUARIX QUADRIVALENT)		UNK	IM	16	M	7
714549	HPV9	HPV (GARDASIL 9)		UNK	IM	16	M	7
741019	RV5	ROTAVIRUS (ROTATEQ)		3	IM	1.92	M	62
764697	DTAPHEPBIP	DTAP + HEPB + IPV (PEDIARIX)		UNK		0.17	F
764697	HIBV	HIB (NO BRAND NAME)		UNK		0.17	F
764697	PNC13	PNEUMO (PREVNAR13)		UNK	UN	0.17	F
764697	RV1	ROTAVIRUS (ROTARIX)		UNK	PO	0.17	F
765430	DTAPHEPBIP	DTAP + HEPB + IPV (PEDIARIX)	db5h3	3	IM	0.5	F	1
765430	HIBV	HIB (ACTHIB)	ui904aa	3	IM	0.5	F	1
765430	PNC13	PNEUMO (PREVNAR13)	t85621	3	IM	0.5	F	1
765430	RV5	ROTAVIRUS (ROTATEQ)	n029669	3	PO	0.5	F	1
766132	DTAPHEPBIP	DTAP + HEPB + IPV (PEDIARIX)		UNK		0.17	F
766132	HIBV	HIB (PEDVAXHIB)		UNK	UN	0.17	F
766132	PNC13	PNEUMO (PREVNAR13)		UNK		0.17	F
766132	RV1	ROTAVIRUS (ROTARIX)		UNK		0.17	F
766756	DTAPHEPBIP	DTAP + HEPB + IPV (PEDIARIX)		1		0.17	F
766756	HIBV	HIB (NO BRAND NAME)		UNK		0.17	F
766756	PNC13	PNEUMO (PREVNAR13)		1		0.17	F
766756	RV1	ROTAVIRUS (ROTARIX)		1		0.17	F
767646	DTAP	DTAP (NO BRAND NAME)		1	UN		U
767646	RVX	ROTAVIRUS (NO BRAND NAME)		1			U
773380	RV5	ROTAVIRUS (ROTATEQ)	M006111	3	PO	0.17	M	83
777341	DTAPHEPBIP	DTAP + HEPB + IPV (PEDIARIX)	974ja	3	IM	0.5	M	668
777341	PNC13	PNEUMO (PREVNAR13)	m16259	3	IM	0.5	M	668
777341	RV5	ROTAVIRUS (ROTATEQ)	l023870	3	PO	0.5	M	668
788284	HEPA	HEP A (VAQTA)	3TG52	1	IM	1	F	2
788284	MMR	MEASLES + MUMPS + RUBELLA (MMR II)	N024401	1	SC	1	F	2
788284	VARCEL	VARICELLA (VARIVAX)	R009411	1	SC	1	F	2
798675	MMRV	MEASLES + MUMPS + RUBELLA + VARICELLA (PROQUAD)	90707	1	SYR	1	M	2
799461	DTAPIPVHIB	DTAP + IPV + HIB (PENTACEL)	C5029AA	3	SYR	0.42	M	22
799461	HEP	HEP B (RECOMBIVAX HB)	L048848	2	SYR	0.42	M	22
799461	PNC13	PNEUMO (PREVNAR13)	M59340	3	SYR	0.42	M	22
799461	RV5	ROTAVIRUS (ROTATEQ)	L033543	2	PO	0.42	M	22
808714	DTAPIPVHIB	DTAP + IPV + HIB (PENTACEL)		1	UN	0.17	F	9
808714	HEP	HEP B (NO BRAND NAME)		2	UN	0.17	F	9
808714	PNC13	PNEUMO (PREVNAR13)		1	UN	0.17	F	9
808714	RV1	ROTAVIRUS (ROTARIX)	R021390	1	PO	0.17	F	9
813068	MEN	MENINGOCOCCAL (NO BRAND NAME)		UNK	UN	11	F
830215	DTAPHEPBIP	DTAP + HEPB + IPV (PEDIARIX)	74FN7	2	IM	0.33	F	16
830215	HIBV	HIB (ACTHIB)	UI973AAA	2	IM	0.33	F	16
830215	PNC13	PNEUMO (PREVNAR13)	X70863	2	IM	0.33	F	16
830215	RV5	ROTAVIRUS (ROTATEQ)	R034700	2	PO	0.33	F	16
838189	DTAPIPVHIB	DTAP + IPV + HIB (PENTACEL)		UNK	OT		M	8
838189	HEPA	HEP A (VAQTA)		UNK	OT		M	8
838189	MMR	MEASLES + MUMPS + RUBELLA (MMR II)		UNK	OT		M	8
838189	PNC13	PNEUMO (PREVNAR13)		UNK	OT		M	8
838189	VARCEL	VARICELLA (VARIVAX)		UNK	OT		M	8
846127	MMR	MEASLES + MUMPS + RUBELLA (MMR II)	R02913	1	IM	4	M	6
846561	DTAPHEPBIP	DTAP + HEPB + IPV (PEDIARIX)	MG92G	1	IM	0.08	M	4
846561	HIBV	HIB (PEDVAXHIB)	S000354	1	IM	0.08	M	4
846561	PNC13	PNEUMO (PREVNAR13)	AG8347	1	IM	0.08	M	4
846561	RV1	ROTAVIRUS (ROTARIX)	3TK53	1	PO	0.08	M	4
853609	TDAP	TDAP (NO BRAND NAME)		2		0.33	F
863441	MMR	MEASLES + MUMPS + RUBELLA (MMR II)	S015092	UNK	OT	1.08	M
863441	VARCEL	VARICELLA (VARIVAX)	S021323	UNK	OT	1.08	M
870619	DTAPIPVHIB	DTAP + IPV + HIB (PENTACEL)	C5388AA	2	IM	0.33	M	17
870619	PNC13	PNEUMO (PREVNAR13)	T52799	2	IM	0.33	M	17
870619	RV5	ROTAVIRUS (ROTATEQ)	N032565	2	PO	0.33	M	17
870805	HEP	HEP B (ENGERIX-B)	95SN2	1	IM		F	3
877633	DTAPHEPBIP	DTAP + HEPB + IPV (PEDIARIX)		UNK	IM	0.5	M	1
877633	PNC13	PNEUMO (PREVNAR13)		UNK		0.5	M	1
877633	RV1	ROTAVIRUS (ROTARIX)		UNK		0.5	M	1
883226	RV1	ROTAVIRUS (ROTARIX)		3	PO	0.58	M	1
900409	HEP	HEP B (RECOMBIVAX HB)	j7h40	2	IM	0.17	F	0
1055124	DTAPIPVHIB	DTAP + IPV + HIB (PENTACEL)	UJ523AAA	4	IM	1.25	M	7
1055124	HEPA	HEP A (VAQTA)	T033519	1	IM	1.25	M	7
1112363	DTAPIPVHIB	DTAP + IPV + HIB (PENTACEL)	UJ326AB	1	IM	0.17	M	3
1112363	PNC13	PNEUMO (PREVNAR13)	DL2861	1	IM	0.17	M	3
1112363	RV5	ROTAVIRUS (ROTATEQ)	S024844	1	PO	0.17	M	3
1370570	COVID19	COVID19 (COVID19 (PFIZER-BIONTECH))		1		18	M	0
1428800	COVID19	COVID19 (COVID19 (PFIZER-BIONTECH))	EW0178	2		12	F	5
1478124	COVID19	COVID19 (COVID19 (PFIZER-BIONTECH))	EW0196	1	IM	15	M	8
1493759	DTAP	DTAP (DAPTACEL)	C5774CA	1	IM	0.17	F	1
1493759	HIBV	HIB (ACTHIB)	UJ404AAB	1	IM	0.17	F	1
1493759	IPV	POLIO VIRUS, INACT. (IPOL)	R1F97	1	IM	0.17	F	1
1493759	PNC13	PNEUMO (PREVNAR13)	DR1779	1	IM	0.17	F	1
1493759	RV5	ROTAVIRUS (ROTATEQ)	T028131	1	PO	0.17	F	1
1549700	COVID19	COVID19 (COVID19 (PFIZER-BIONTECH))	EW0172	1	IM	12	M	52
1549700	COVID19	COVID19 (COVID19 (PFIZER-BIONTECH))	EW0180	2	IM	12	M	52
1720100	DTAPIPV	DTAP + IPV (QUADRACEL)	C5772AA	5	IM	5	M	12
1720100	MMRV	MEASLES + MUMPS + RUBELLA + VARICELLA (PROQUAD)	TO32149	2	IM	5	M	12
1892626	VARCEL	VARICELLA (VARIVAX)		UNK		2	F	1334
1909939	COVID19	COVID19 (COVID19 (PFIZER-BIONTECH))		1	IM	9	M	16
1910701	COVID19	COVID19 (COVID19 (PFIZER-BIONTECH))		1	SYR	11	M	11
1930014	COVID19	COVID19 (COVID19 (PFIZER-BIONTECH))		1	IM	7	F	10
1933934	COVID19	COVID19 (COVID19 (MODERNA))	939904	1	SYR	42	F	1
1998916	COVID19	COVID19 (COVID19 (PFIZER-BIONTECH))		UNK		9	F	27
2006451	COVID19	COVID19 (COVID19 (PFIZER-BIONTECH))	FJ8757	1	IM	6	F	12
2184157	COVID19	COVID19 (COVID19 (PFIZER-BIONTECH))	FL0007	1	IM	5	M	15
2249585	DTAP	DTAP (INFANRIX)		UNK		1	F	0
2249585	HEPA	HEP A (HAVRIX)		UNK		1	F	0
2249585	MMRV	MEASLES + MUMPS + RUBELLA + VARICELLA (PROQUAD)		UNK		1	F	0
2249585	PNC13	PNEUMO (PREVNAR13)		UNK		1	F	0
2271220	COVID19	COVID19 (COVID19 (PFIZER-BIONTECH))		1	UN	10	M	54
2271220	COVID19	COVID19 (COVID19 (PFIZER-BIONTECH))		2	UN	10	M	54
2292665	MMR	MEASLES + MUMPS + RUBELLA (MMR II)		UNK		1	M	0
2292665	VARCEL	VARICELLA (VARIVAX)		UNK		1	M	0
2387677	COVID19	COVID19 (COVID19 (PFIZER-BIONTECH))		2			M
2427478	COVID19	COVID19 (COVID19 (PFIZER-BIONTECH))	FT9142	2		4	F	8
2439549	COVID19	COVID19 (COVID19 (JANSSEN))		1			M
2466738	COVID19	COVID19 (COVID19 (MODERNA))	AR9236B	2	IM	2	M	6
2535247	COVID19	COVID19 (COVID19 (PFIZER-BIONTECH))		3	IM	2	M	2
2545866	COVID19	COVID19 (COVID19 (MODERNA))	AS1414B	1	IM	1.17	M	77
2555818	DTAPHEPBIP	DTAP + HEPB + IPV (PEDIARIX)	7P2Y3	2	IM	0.33	M	0
2555818	HIBV	HIB (PEDVAXHIB)	U012329	2	IM	0.33	M	0
2555818	PNC13	PNEUMO (PREVNAR13)	EE31121	2	IM	0.33	M	0
2555818	RV5	ROTAVIRUS (ROTATEQ)	1742080	2	PO	0.33	M	0
2564608	COVID19	COVID19 (COVID19 (PFIZER-BIONTECH))		UNK		17	F	22
2564608	COVID19	COVID19 (COVID19 (PFIZER-BIONTECH))		UNK		17	F	22
2564608	COVID19	COVID19 (COVID19 (PFIZER-BIONTECH))		UNK		17	F	22
2564608	COVID19-2	COVID19 (COVID19 (PFIZER-BIONTECH BIVALENT))	GJ2524	4	UN	17	F	22
2573898	DTAPIPVHIB	DTAP + IPV + HIB (PENTACEL)	UJ678AAA	UNK	IM	0.33	F	11
2573898	PNC13	PNEUMO (PREVNAR13)	FN5555	UNK	IM	0.33	F	11
2573898	RV1	ROTAVIRUS (ROTARIX)		UNK	IM	0.33	F	11
2639477	PNC13	PNEUMO (PREVNAR13)		UNK			U
2654415	COVID19-2	COVID19 (COVID19 (PFIZER-BIONTECH BIVALENT))	GK1657	4	IM	6	F	10
2678813	COVID19	COVID19 (COVID19 (PFIZER-BIONTECH))		3			M
2689386	DTPPVHBHPB	DTAP+IPV+HIB+HEPB (VAXELIS)	U7536AA	2	IM	0.33	M	4
2689386	PNC15	PNEUMO (VAXNEUVANCE)	W036242	2	IM	0.33	M	4
2689386	RV5	ROTAVIRUS (ROTATEQ)	1938977	2	PO	0.33	M	4
151929	MMR	MEASLES + MUMPS + RUBELLA (MMR II)		UNK	SC	2.5	F
154929	DTAP	DTAP (ACEL-IMUNE)		1	IM	1.3	M	4
161819	MMR	MEASLES + MUMPS + RUBELLA (MMR II)	1890H	1	IM	1.3	M	2
164444	MMR	MEASLES + MUMPS + RUBELLA (MMR II)	0367J	1	SC	1.4	M	4
170254	HEPA	HEP A (HAVRIX)		1	IM	2	M	3
170307	VARCEL	VARICELLA (VARIVAX)		UNK	SC	3.8	F	21
173287	DTAP	DTAP (INFANRIX)		UNK	IM	0.25	F
173287	HIBV	HIB (NO BRAND NAME)		UNK		0.25	F
173287	IPV	POLIO VIRUS, INACT. (NO BRAND NAME)		UNK		0.25	F
178602	MMR	MEASLES + MUMPS + RUBELLA (MMR II)		UNK	IM	1.08	F	11
179649	PNC	PNEUMO (PREVNAR)		1	IM	7	F	1
181616	DTAP	DTAP (ACEL-IMUNE)		UNK	SC	1.75	M	2
187184	PNC	PNEUMO (PREVNAR)		UNK	IM	0.7	M	8
190833	DTPIHI	DT+IPV+HIB+HEPB (NO BRAND NAME)	7441407441	UNK	IM	0.3	M	1
190833	HEP	HEP B (ENGERIX-B)	5243C9	UNK	IM	0.3	M	1
199985	6VAX-F	DTAP+IPV+HEPB+HIB (INFANRIX HEXA)	21H099	UNK	IM		U
199985	PNC	PNEUMO (PREVNAR)	62706	4	IM		U
205835	DTPPHIB	DTP + IPV + ACT-HIB (NO BRAND NAME)	20H201	UNK	IM	0.3	M	10
206016	PNC	PNEUMO (PREVNAR)		2	SC	1.9	M
216235	DTAP	DTAP (INFANRIX)	20H221	UNK		0.17	M	3
216235	HIBV	HIB (HIBERIX)	20H221	UNK		0.17	M	3
216235	IPV	POLIO VIRUS, INACT. (NO BRAND NAME)	20H221	UNK		0.17	M	3
217172	HEP	HEP B (ENGERIX-B)		UNK		0.08	M
232623	MMR	MEASLES + MUMPS + RUBELLA (MMR II)		UNK		1.2	F
234045	DTAP	DTAP (INFANRIX)	14540B9	UNK	IM	6	F	1
234459	PNC	PNEUMO (PREVNAR)		3	IM	1.2	M	7
241750	PNC	PNEUMO (PREVNAR)		1	IM	0.3	F	3
243670	PNC	PNEUMO (PREVNAR)		2		1.83	M	14
246436	DTAP	DTAP (INFANRIX)		UNK		0.4	M	2
246436	HIBV	HIB (HIBERIX)		UNK		0.4	M	2
246436	IPV	POLIO VIRUS, INACT. (NO BRAND NAME)		UNK		0.4	M	2
256416	PNC	PNEUMO (PREVNAR)		2	IM	1.5	M
263610	PNC	PNEUMO (PREVNAR)		1	IM	0.1	M
269334	MMR	MEASLES + MUMPS + RUBELLA (MMR II)		UNK	IM	1.67	M	3
269622	6VAX-F	DTAP+IPV+HEPB+HIB (INFANRIX HEXA)		UNK	IM	0.33	F	6
271194	FLU3	INFLUENZA (SEASONAL) (FLUARIX)	AFLUA224AB	UNK		1.27	M	5
273518	MMR	MEASLES + MUMPS + RUBELLA (MMR II)		UNK	SC	1	M	15
279886	DTAPH	DTAP + HIB (NO BRAND NAME)		UNK		0.3	M	19
279886	IPV	POLIO VIRUS, INACT. (NO BRAND NAME)		UNK		0.3	M	19
279886	PNC	PNEUMO (PREVNAR)		2	UN	0.3	M	19
285903	RV5	ROTAVIRUS (ROTATEQ)		UNK	UN	0.33	M
287364	RV5	ROTAVIRUS (ROTATEQ)		UNK	PO	0.42	M	4
287564	PNC	PNEUMO (PREVNAR)		UNK	IM	0.4	M	0
291037	DTAP	DTAP (INFANRIX)		UNK	IM	0.93	U	17
291037	HEP	HEP B (ENGERIX-B)		UNK	IM	0.93	U	17
291037	HIBV	HIB (HIBERIX)		UNK	IM	0.93	U	17
291037	IPV	POLIO VIRUS, INACT. (NO BRAND NAME)		UNK	IM	0.93	U	17
291037	PNC	PNEUMO (PREVNAR)		4	IM	0.93	U	17
309546	DTAPH	DTAP + HIB (TRIHIBIT)		UNK		0.51	M	0
309546	PNC	PNEUMO (PREVNAR)		UNK		0.51	M	0
310109	RV1	ROTAVIRUS (ROTARIX)		UNK	UN	0.2	M
311454	PNC	PNEUMO (PREVNAR)		3	IM	0.6	M	0
312125	PNC	PNEUMO (PREVNAR)	897284F	1	IM	0.17	M	40
312125	RV5	ROTAVIRUS (ROTATEQ)	066IU	1	PO	0.17	M	40
316157	MMR	MEASLES + MUMPS + RUBELLA (MMR II)		1	UN	1.5	F
316408	MMR	MEASLES + MUMPS + RUBELLA (MMR II)		1	UN	1.5	U
318251	DTP	DTP (NO BRAND NAME)		UNK	UN	0.2	M	1
318251	HEP	HEP B (NO BRAND NAME)		UNK	UN	0.2	M	1
318251	HIBV	HIB (NO BRAND NAME)		UNK	UN	0.2	M	1
318251	IPV	POLIO VIRUS, INACT. (NO BRAND NAME)		UNK	UN	0.2	M	1
318251	MNC	MENINGOCOCCAL (MENINGITEC)		UNK	UN	0.2	M	1
318251	PNC	PNEUMO (PREVNAR)		UNK	UN	0.2	M	1
323036	MMR	MEASLES + MUMPS + RUBELLA (MMR II)		UNK	UN	18	F
325819	RV5	ROTAVIRUS (ROTATEQ)	0324X	1	PO	0.2	F	11
329107	RV5	ROTAVIRUS (ROTATEQ)	0324X	2	PO	0.3	M	3
330572	DTAP	DTAP (INFANRIX)		2	IM	0.3	F	9
330572	HEP	HEP B (ENGERIX-B)		2	IM	0.3	F	9
330572	HIBV	HIB (HIBERIX)		2	IM	0.3	F	9
330572	IPV	POLIO VIRUS, INACT. (NO BRAND NAME)		2	IM	0.3	F	9
330572	PNC	PNEUMO (PREVNAR)		2	UN	0.3	F	9
330572	RV5	ROTAVIRUS (ROTATEQ)	0324X	2	PO	0.3	F	9
339324	PNC	PNEUMO (PREVNAR)		2	IM		M
342082	BCG	BCG (NO BRAND NAME)		UNK	UN	0.9	F
343042	6VAX-F	DTAP+IPV+HEPB+HIB (INFANRIX HEXA)		1	IM	0.3	U	0
343042	PNC	PNEUMO (PREVNAR)		3	IM	0.3	U	0
346142	DTAP	DTAP (DAPTACEL)	C2972AB	UNK	IM	0.8	M	19
346142	HIBV	HIB (ACTHIB)	C2972AB	UNK	IM	0.8	M	19
346142	IPV	POLIO VIRUS, INACT. (IPOL)	C2972AB	UNK	IM	0.8	M	19
346142	PNC	PNEUMO (PREVNAR)	31969	4	IM	0.8	M	19
349181	6VAX-F	DTAP+IPV+HEPB+HIB (INFANRIX HEXA)	A21CA383B	3	IM	0.44	M	1
349181	PNC	PNEUMO (PREVNAR)	32274	3	IM	0.44	M	1
351169	RV5	ROTAVIRUS (ROTATEQ)		1	UN	1.6	F	0
351579	PNC	PNEUMO (PREVNAR)		2	IM	0.6	M
352247	PNC	PNEUMO (PREVNAR)		UNK	IM	1.4	F	4
352650	DTAP	DTAP (INFANRIX)	C2972AB	UNK	IM	0.8	M	19
352650	HIBV	HIB (NO BRAND NAME)	C2972AB	UNK	IM	0.8	M	19
352650	IPV	POLIO VIRUS, INACT. (NO BRAND NAME)	C2972AB	UNK	IM	0.8	M	19
352650	PNC	PNEUMO (PREVNAR)	31969	4	IM	0.8	M	19
354060	HEPAB	HEP A + HEP B (TWINRIX)	AHABB115AG	2	UN	2	M	1
357633	PNC	PNEUMO (PREVNAR)		2	UN	0.8	M
358220	PNC	PNEUMO (PREVNAR)	D84663	1	IM	0.3	M	30
359200	6VAX-F	DTAP+IPV+HEPB+HIB (INFANRIX HEXA)	A21CA530A	UNK	UN		M	48
359200	PNC	PNEUMO (PREVNAR)	D63606	UNK	UN		M	48
359200	RV5	ROTAVIRUS (ROTATEQ)	0027Y	UNK	PO		M	48
361429	RV5	ROTAVIRUS (ROTATEQ)	0027Y	3	UN	0.4	F	24
366349	YF	YELLOW FEVER (NO BRAND NAME)		UNK	UN	12	M
371107	DTAPIPVHIB	DTAP + IPV + HIB (INFANRIX QUINTA)		UNK	UN	1.47	M	15
371107	PNC	PNEUMO (PREVNAR)		4	UN	1.47	M	15
371439	DTAPIPVHIB	DTAP + IPV + HIB (INFANRIX QUINTA)		4	IJ	1.47	M	14
371439	PNC	PNEUMO (PREVNAR)		UNK	UN	1.47	M	14
373894	6VAX-F	DTAP+IPV+HEPB+HIB (INFANRIX HEXA)	A21CA345A	UNK	IM	0.25	F	1
373894	PNC	PNEUMO (PREVNAR)	28168	UNK	IM	0.25	F	1
381658	FLUX	INFLUENZA (SEASONAL) (NO BRAND NAME)		UNK	IJ	1	F
387255	PNC13	PNEUMO (PREVNAR13)		2	IM		U
388359	6VAX-F	DTAP+IPV+HEPB+HIB (INFANRIX HEXA)	A21CA699A	UNK	IM	0.95	M	0
388359	PNC	PNEUMO (PREVNAR)	E36463	3	IM	0.95	M	0
392521	6VAX-F	DTAP+IPV+HEPB+HIB (INFANRIX HEXA)		UNK	UN	0.47	F	0
392521	PNC	PNEUMO (PREVNAR)		UNK	IM	0.47	F	0
392521	RV5	ROTAVIRUS (ROTATEQ)		UNK	UN	0.47	F	0
393962	DTAP	DTAP (INFANRIX)	E21703	2	UN	0.3	F	4
394030	DTAP	DTAP (NO BRAND NAME)		UNK	IM		U
394030	HIBV	HIB (NO BRAND NAME)		UNK	IM		U
394030	IPV	POLIO VIRUS, INACT. (NO BRAND NAME)		UNK	IM		U
394030	PNC	PNEUMO (PREVNAR)		2	IM		U
398534	MMR	MEASLES + MUMPS + RUBELLA (MMR II)		UNK	IM		U	15
402278	6VAX-F	DTAP+IPV+HEPB+HIB (INFANRIX HEXA)	A21CA780A	1	IM	0.17	M	1
402278	PNC13	PNEUMO (PREVNAR13)	E43445	1	IM	0.17	M	1
402820	DTP	DTP (NO BRAND NAME)		UNK	UN	0.16	F	25
402820	HIBV	HIB (NO BRAND NAME)		UNK	UN	0.16	F	25
402820	IPV	POLIO VIRUS, INACT. (NO BRAND NAME)		UNK	UN	0.16	F	25
402820	MNQ	MENINGOCOCCAL CONJUGATE (MENVEO)	X79P4511S	UNK	IM	0.16	F	25
402820	PPV	PNEUMO (NO BRAND NAME)		UNK	UN	0.16	F	25
410707	DTPHEP	DTP + HEP B (TRITANRIX)		1	UN	0.65	M	0
410707	HIBV	HIB (HIBERIX)		1	UN	0.65	M	0
410707	PNC13	PNEUMO (PREVNAR13)		1	SC	0.65	M	0
413843	6VAX-F	DTAP+IPV+HEPB+HIB (INFANRIX HEXA)	021CA735A	1	IM	0.22	M	2
413843	PNC13	PNEUMO (PREVNAR13)	E43445	1	IM	0.22	M	2
419404	HIBV	HIB (ACTHIB)	E1033	UNK	UN	1.04	M	1
419404	PNC	PNEUMO (PREVNAR)	10G01A	UNK	UN	1.04	M	1
420092	DTP	DTP (NO BRAND NAME)		UNK	SC	0.4	F	0
420092	HIBV	HIB (ACTHIB)		UNK	SC	0.4	F	0
420092	PNC	PNEUMO (PREVNAR)	10E01A	UNK	SC	0.4	F	0
420391	DTP	DTP (NO BRAND NAME)	V068A	1	UN	0.4	F	0
420391	HIBV	HIB (ACTHIB)	E0760	2	SC	0.4	F	0
420391	PNC	PNEUMO (PREVNAR)	10E01A	2	SC	0.4	F	0
422425	PNC	PNEUMO (PREVNAR)		UNK	IM	1.1	M	14
424592	6VAX-F	DTAP+IPV+HEPB+HIB (INFANRIX HEXA)	A21FA876A	1	IM	0.17	F	2
424592	PNC13	PNEUMO (PREVNAR13)	915576	1	IM	0.17	F	2
424592	RV1	ROTAVIRUS (ROTARIX)	XROLA767A1	1	PO	0.17	F	2
425275	6VAX-F	DTAP+IPV+HEPB+HIB (INFANRIX HEXA)	A21CB004A	3	UN	0.98	M	3
425275	PNC13	PNEUMO (PREVNAR13)		3	UN	0.98	M	3
425676	MMR	MEASLES + MUMPS + RUBELLA (PRIORIX)	A69CC493A	UNK	UN	1	M	0
425676	PNC13	PNEUMO (PREVNAR13)	E57031	UNK	UN	1	M	0
430220	PNC	PNEUMO (PREVNAR)		UNK	IM	0.8	F	16
433543	6VAX-F	DTAP+IPV+HEPB+HIB (INFANRIX HEXA)	A21CB037C	3	IM	1.18	M	0
433543	PNC	PNEUMO (PREVNAR)	F06986	3	IM	1.18	M	0
434428	HEPA	HEP A (HAVRIX)	AHAVB470AE	2	UN	2	M	2
435589	RV5	ROTAVIRUS (ROTATEQ)	8727	UNK	PO	0.15	F	18
436318	PNC	PNEUMO (PREVNAR)		2	SC	0.59	U
436688	DTAPIPVHIB	DTAP + IPV + HIB (NO BRAND NAME)	G4015	1	IM	0.3	M	4
436688	RV5	ROTAVIRUS (ROTATEQ)	1126Z	1	PO	0.3	M	4
437890	HIBV	HIB (ACTHIB)		UNK	SC	1.3	F	1
440914	RV5	ROTAVIRUS (ROTATEQ)		UNK	PO	0.4	F	16
441203	PNC	PNEUMO (PREVNAR)		2	SC	0.7	U	0
445403	FLUX	INFLUENZA (SEASONAL) (NO BRAND NAME)		UNK	UN	3	U	0
445403	PNC13	PNEUMO (PREVNAR13)		1	IM	3	U	0
448305	PNC	PNEUMO (PREVNAR)		UNK	SC	0.38	M	98
448513	6VAX-F	DTAP+IPV+HEPB+HIB (INFANRIX HEXA)	A21CB162B	1	IM	0.25	F
448513	RV5	ROTAVIRUS (ROTATEQ)	0074AA	1	PO	0.25	F
448942	PNC13	PNEUMO (PREVNAR13)	915576	UNK	IM	0.17	F	2
448946	6VAX-F	DTAP+IPV+HEPB+HIB (INFANRIX HEXA)	A21CB162B	UNK	IM	0.23	F	0
448946	PNC13	PNEUMO (PREVNAR13)	PAA012842	UNK	IM	0.23	F	0
448946	RV5	ROTAVIRUS (ROTATEQ)		UNK	PO	0.23	F	0
449451	PNC13	PNEUMO (PREVNAR13)		3	UN	1.4	F	1
450777	RV1	ROTAVIRUS (ROTARIX)		UNK	PO	0.36	F	15
452502	PNC	PNEUMO (PREVNAR)		UNK	SC		U
452550	DTAP	DTAP (NO BRAND NAME)		UNK	IM	1.6	F	22
452550	IPV	POLIO VIRUS, INACT. (NO BRAND NAME)		UNK	PO	1.6	F	22
452550	MMR	MEASLES + MUMPS + RUBELLA (MMR II)		UNK	SC	1.6	F	22
455141	HIBV	HIB (ACTHIB)	G1454	3	UN	1.5	F	3
457600	6VAX-F	DTAP+IPV+HEPB+HIB (INFANRIX HEXA)		1	IM	0.2	F	8
457600	PNC13	PNEUMO (PREVNAR13)		1	IM	0.2	F	8
457600	RV5	ROTAVIRUS (ROTATEQ)		1	PO	0.2	F	8
457974	6VAX-F	DTAP+IPV+HEPB+HIB (INFANRIX HEXA)		1	UN	0.3	M	20
457974	RV5	ROTAVIRUS (ROTATEQ)	1700AA	1	PO	0.3	M	20
458061	HIBV	HIB (ACTHIB)	G1477	1	SC	0.2	M	3
458061	PNC	PNEUMO (PREVNAR)		UNK	SC	0.2	M	3
458061	RV1	ROTAVIRUS (ROTARIX)		UNK	PO	0.2	M	3
458286	HIBV	HIB (ACTHIB)	G1477	UNK	UN	0.17	M	1
458286	PNC	PNEUMO (PREVNAR)	11J02A	UNK	UN	0.17	M	1
458286	RV1	ROTAVIRUS (ROTARIX)	AROLA428CA	UNK	PO	0.17	M	1
459211	RV1	ROTAVIRUS (ROTARIX)	AROLA462AE	2	PO	0.21	M	12
461577	DTP	DTP (NO BRAND NAME)		3	UN	1	F	162
461577	HIBV	HIB (ACTHIB)	E0770	UNK	SC	1	F	162
461577	PNC	PNEUMO (PREVNAR)		UNK	UN	1	F	162
461729	PNC	PNEUMO (PREVNAR)		UNK	SC	1	U
462014	6VAX-F	DTAP+IPV+HEPB+HIB (INFANRIX HEXA)		UNK	UN	0.16	U	49
462014	PNC13	PNEUMO (PREVNAR13)		UNK	UN	0.16	U	49
462014	RV5	ROTAVIRUS (ROTATEQ)		UNK	UN	0.16	U	49
462470	DTP	DTP (NO BRAND NAME)		UNK	SC	0.25	F	0
462470	HIBV	HIB (ACTHIB)		UNK	SC	0.25	F	0
462470	PNC	PNEUMO (PREVNAR)		UNK	SC	0.25	F	0
462473	HIBV	HIB (ACTHIB)		2	SC	0.5	M	0
462473	PNC	PNEUMO (PREVNAR)		2	SC	0.5	M	0
462934	MEN	MENINGOCOCCAL (NO BRAND NAME)		UNK	UN	1.27	F	5
462934	MMR	MEASLES + MUMPS + RUBELLA (NO BRAND NAME)		1	UN	1.27	F	5
464245	PNC	PNEUMO (PREVNAR)		1	SC	0.3	U
464622	6VAX-F	DTAP+IPV+HEPB+HIB (INFANRIX HEXA)	A21CB025C	UNK	IM	0.19	M	9
464622	PNC13	PNEUMO (PREVNAR13)	F72853	UNK	IM	0.19	M	9
464622	RV1	ROTAVIRUS (ROTARIX)	AR0LA462AE	UNK	PO	0.19	M	9
465029	DTAPIPVHIB	DTAP + IPV + HIB (INFANRIX QUINTA)		UNK	IM	0.5	F	4
465029	PNC13	PNEUMO (PREVNAR13)		UNK	IM	0.5	F	4
465340	HIBV	HIB (ACTHIB)		UNK	SC	2	F
465340	PNC	PNEUMO (PREVNAR)		UNK	SC	2	F
465512	PNC	PNEUMO (PREVNAR)		UNK	SC		U	39
470878	6VAX-F	DTAP+IPV+HEPB+HIB (INFANRIX HEXA)		1	IM	0.2	F	0
470878	PNC13	PNEUMO (PREVNAR13)		1	IM	0.2	F	0
470878	RV1	ROTAVIRUS (ROTARIX)		1	PO	0.2	F	0
471799	RV1	ROTAVIRUS (ROTARIX)	AROLA423BB	UNK	PO	0.19	M	30
472357	DTP	DTP (NO BRAND NAME)		UNK	UN	0.3	M
472357	HIBV	HIB (ACTHIB)	H1024	UNK	UN	0.3	M
472990	6VAX-F	DTAP+IPV+HEPB+HIB (INFANRIX HEXA)	A21CB295A	1	UN	0.33	M	28
472990	PNC	PNEUMO (PREVNAR)	PAA012842	1	UN	0.33	M	28
472990	RV1	ROTAVIRUS (ROTARIX)		1	PO	0.33	M	28
475367	HEPA	HEP A (HAVRIX)	AHAVB567CL	UNK	UN	1.18	M	0
476807	HIBV	HIB (ACTHIB)		UNK	SC	0.3	F
476807	IPV	POLIO VIRUS, INACT. (POLIOVAX)		UNK	SC	0.3	F
476807	PNC	PNEUMO (PREVNAR)		UNK	SC	0.3	F
478117	RAB	RABIES (RABAVERT)		UNK	SYR	9	M
480987	HEPA	HEP A (HAVRIX)	AHAVB567CL	UNK	IM	1.18	M	0
483951	RV1	ROTAVIRUS (ROTARIX)	AROLA254AC	UNK	PO	0.32	F	379
484877	PNC13	PNEUMO (PREVNAR13)		UNK	UN	1.3	F
486715	6VAX-F	DTAP+IPV+HEPB+HIB (INFANRIX HEXA)	A21CB343A	UNK	IM	0.99	F	14
486715	PNC13	PNEUMO (PREVNAR13)	G15569	UNK	IM	0.99	F	14
487427	HIBV	HIB (ACTHIB)		UNK	SC	0.27	M	0
487427	PNC	PNEUMO (PREVNAR)	12E01A	2	SC	0.27	M	0
487569	PPV	PNEUMO (NO BRAND NAME)	12E03A	UNK	SC	1.3	F
488484	6VAX-F	DTAP+IPV+HEPB+HIB (INFANRIX HEXA)	A21CB466B	2	IM	0.47	F	80
488484	PNC13	PNEUMO (PREVNAR13)	F98948	2	IM	0.47	F	80
489734	PNC	PNEUMO (PREVNAR)		2	SC	0.3	F	0
491974	MMRV	MEASLES + MUMPS + RUBELLA + VARICELLA (NO BRAND NAME)		UNK	SC	1.3	F	3
491974	PNC13	PNEUMO (PREVNAR13)		UNK	IM	1.3	F	3
492024	MMR	MEASLES + MUMPS + RUBELLA (MMR II)		UNK	SC	1.1	M	28
492683	DTAPIPV	DTAP + IPV (INFANRIX TETRA)		1	IM	0.19	M	12
492877	6VAX-F	DTAP+IPV+HEPB+HIB (INFANRIX HEXA)		UNK	SYR	0.6	M	26
492877	RV1	ROTAVIRUS (ROTARIX)		UNK	PO	0.6	M	26
495375	RV5	ROTAVIRUS (ROTATEQ)		3	UN	0.5	U	87
495375	UNK	VACCINE NOT SPECIFIED (NO BRAND NAME)		UNK	SYR	0.5	U	87
498183	MMR	MEASLES + MUMPS + RUBELLA (MMR II)	1939AA	1	SC	1.45	F	12
499481	DTP	DTP (NO BRAND NAME)		UNK	UN	0.39	F	0
499481	HEP	HEP B (NO BRAND NAME)		UNK	UN	0.39	F	0
499481	HIBV	HIB (NO BRAND NAME)		UNK	UN	0.39	F	0
499481	RV1	ROTAVIRUS (ROTARIX)	AROLA642AD	UNK	PO	0.39	F	0
504919	DTAPIPVHIB	DTAP + IPV + HIB (INFANRIX QUINTA)		UNK	IM	0.3	M	26
504919	PNC13	PNEUMO (PREVNAR13)		UNK	IM	0.3	M	26
505144	DTAPIPVHIB	DTAP + IPV + HIB (INFANRIX QUINTA)		UNK	IM	2	M	6
505145	DTAPIPVHIB	DTAP + IPV + HIB (INFANRIX QUINTA)		UNK	IM	0.3	M	26
505145	PNC13	PNEUMO (PREVNAR13)		UNK	IM	0.3	M	26
505704	DTAPIPVHIB	DTAP + IPV + HIB (INFANRIX QUINTA)	A21CB004A	3	UN	0.98	M	3
505704	PNC13	PNEUMO (PREVNAR13)	PAA012842	3	UN	0.98	M	3
507812	RV5	ROTAVIRUS (ROTATEQ)		2	PO	0.3	U
514757	DTAPIPV	DTAP + IPV (INFANRIX TETRA)	J0334	UNK	IM	3	F	11
514757	MMR	MEASLES + MUMPS + RUBELLA (MMR II)	1783AA	UNK	IM	3	F	11
516276	DTAP	DTAP (INFANRIX)		UNK	SYR	0.5	M
516276	PNC10	PNEUMO (SYNFLORIX)		UNK	SYR	0.5	M
519017	DTAPIPVHIB	DTAP + IPV + HIB (INFANRIX QUINTA)		3	SYR	0.4	M	8
519404	DTAPIPV	DTAP + IPV (INFANRIX TETRA)	AC20B200AA	1	SYR	0.3	M	57
519404	HIBV	HIB (NO BRAND NAME)		UNK	SYR	0.3	M	57
519668	PNC13	PNEUMO (PREVNAR13)		UNK	UN		U
519668	RV5	ROTAVIRUS (ROTATEQ)		UNK	UN		U
521100	FLU3	INFLUENZA (SEASONAL) (FLUARIX)	YFLUA784AA	UNK	SYR	1.03	M	0
521100	VARCEL	VARICELLA (NO BRAND NAME)	201306004	UNK	SYR	1.03	M	0
523189	PNC	PNEUMO (PREVNAR)	F65509	2	IM	0.47	F	0
526564	PNC	PNEUMO (PREVNAR)		3	SC	1	M
526853	BCG	BCG (NO BRAND NAME)		1	IM	2	M	197
527823	6VAX-F	DTAP+IPV+HEPB+HIB (INFANRIX HEXA)		2	SYR		M	12
527823	PNC13	PNEUMO (PREVNAR13)		2	SYR		M	12
527823	RV1	ROTAVIRUS (ROTARIX)		2	PO		M	12
527879	DTAPIPVHIB	DTAP + IPV + HIB (INFANRIX QUINTA)		UNK	IM	0.3	F	14
527879	PNC13	PNEUMO (PREVNAR13)		UNK	IM	0.3	F	14
527879	RV1	ROTAVIRUS (ROTARIX)		UNK	PO	0.3	F	14
528110	DTAPIPVHIB	DTAP + IPV + HIB (INFANRIX QUINTA)		UNK	IM	1.7	M	2
528195	DTAPIPVHIB	DTAP + IPV + HIB (INFANRIX QUINTA)		UNK	IM	0.5	F	21
528196	DTAPIPVHIB	DTAP + IPV + HIB (INFANRIX QUINTA)		UNK	IM	0.3	M	1
528960	HEPA	HEP A (HAVRIX)	AHAVB540AE	UNK	SYR	1.3	M	1
528960	MMR	MEASLES + MUMPS + RUBELLA (PRIORIX)	A69CC659A	UNK	SYR	1.3	M	1
529699	IPV	POLIO VIRUS, INACT. (POLIOVAX)	J0209	UNK	SC	3	F	1
529699	JEVX	JAPANESE ENCEPHALITIS (NO BRAND NAME)	JR199	2	UN	3	F	1
533359	PNC13	PNEUMO (PREVNAR13)		1	UN		U	455
533516	HIBV	HIB (ACTHIB)		2	SC		U	424
534808	HIBV	HIB (ACTHIB)		1	SC	0.2	F
534808	PNC13	PNEUMO (PREVNAR13)		1	SC	0.2	F
535244	HIBV	HIB (ACTHIB)		UNK	SC	0.2	F
535244	PPV	PNEUMO (NO BRAND NAME)		UNK	UN	0.2	F
535641	DTPIPV	DTP + IPV (NO BRAND NAME)		UNK	SC	0.3	F
535641	HIBV	HIB (NO BRAND NAME)		UNK	SC	0.3	F
535641	PNC13	PNEUMO (PREVNAR13)		UNK	SC	0.3	F
535771	DTPIPV	DTP + IPV (NO BRAND NAME)		UNK	UN	0.3	F
535771	HIBV	HIB (ACTHIB)		UNK	SC	0.3	F
535771	PPV	PNEUMO (NO BRAND NAME)		UNK	UN	0.3	F
536093	IPV	POLIO VIRUS, INACT. (POLIOVAX)	J0365	3	IM	0.3	M	3
536215	DTAPIPVHIB	DTAP + IPV + HIB (INFANRIX QUINTA)		UNK	UN	1	M	14
539479	6VAX-F	DTAP+IPV+HEPB+HIB (INFANRIX HEXA)	A21CB888A	3	UN	0.93	M	0
539479	PNC13	PNEUMO (PREVNAR13)	H23457	3	IM	0.93	M	0
539855	6VAX-F	DTAP+IPV+HEPB+HIB (INFANRIX HEXA)		1	UN	0.2	M	0
539855	PNC13	PNEUMO (PREVNAR13)		1	UN	0.2	M	0
539855	RV5	ROTAVIRUS (ROTATEQ)	J000939	1	PO	0.2	M	0
539869	HEP	HEP B (ENGERIX-B)		UNK	IM	0.6	F	6
540755	DTAPIPVHIB	DTAP + IPV + HIB (INFANRIX QUINTA)		UNK	IM	0.3	M	3
540755	RV1	ROTAVIRUS (ROTARIX)		UNK	PO	0.3	M	3
541460	HIBV	HIB (ACTHIB)	J1220	4	IM	2	M
542036	HIBV	HIB (ACTHIB)	J1302	1	IM	1.1	F	1
542856	6VAX-F	DTAP+IPV+HEPB+HIB (INFANRIX HEXA)		1	IM	0.28	M	4
542856	PNC13	PNEUMO (PREVNAR13)		1	IM	0.28	M	4
544567	MMR	MEASLES + MUMPS + RUBELLA (PRIORIX)		1		1.25	M	1
544567	VARCEL	VARICELLA (VARILRIX)		UNK		1.25	M	1
546814	HIBV	HIB (ACTHIB)		UNK	UN	0.3	F
546814	PNC13	PNEUMO (PREVNAR13)		UNK	UN	0.3	F
546814	RV5	ROTAVIRUS (ROTATEQ)		1	PO	0.3	F
549849	DTAPIPVHIB	DTAP + IPV + HIB (INFANRIX QUINTA)		UNK	IM	0.6	M	12
549849	HEP	HEP B (ENGERIX-B)		UNK	IM	0.6	M	12
549849	PNC13	PNEUMO (PREVNAR13)		UNK	UN	0.6	M	12
558365	HEP	HEP B (ENGERIX-B)		UNK	IM	0.5	F	1
573189	PNC13	PNEUMO (PREVNAR13)		UNK	UN	2	U
574534	6VAX-F	DTAP+IPV+HEPB+HIB (INFANRIX HEXA)	A21CC078A	1	IM	0.17	F	3
574534	PNC13	PNEUMO (PREVNAR13)	J37620	1	IM	0.17	F	3
575491	DTAPIPVHIB	DTAP + IPV + HIB (INFANRIX QUINTA)		UNK	IM		M	4
575491	PNC13	PNEUMO (PREVNAR13)		UNK	IM		M	4
575491	RV1	ROTAVIRUS (ROTARIX)		UNK	PO		M	4
575622	HEP	HEP B (ENGERIX-B)		UNK	IM	0.58	F	12
576000	6VAX-F	DTAP+IPV+HEPB+HIB (INFANRIX HEXA)		2	UN	0.3	M	2
576000	PNC13	PNEUMO (PREVNAR13)		2	UN	0.3	M	2
576000	RV5	ROTAVIRUS (ROTATEQ)		2	PO	0.3	M	2
576017	MENB	MENINGOCOCCAL B (BEXSERO)	132401B	2	SYR	4	M
576152	DTAP	DTAP (INFANRIX)		UNK	UN		M
576518	MENB	MENINGOCOCCAL B (BEXSERO)		2	SYR		M	13
576519	MENB	MENINGOCOCCAL B (BEXSERO)	132401B	UNK	IM	4	M	2
576670	FLUX	INFLUENZA (SEASONAL) (NO BRAND NAME)		UNK	IM	1.25	M	28
576670	HEPA	HEP A (HAVRIX)		UNK	IM	1.25	M	28
576832	HEP	HEP B (ENGERIX-B)		UNK	IM	0.58	M
577749	RV1	ROTAVIRUS (ROTARIX)		UNK	PO		U
577875	6VAX-F	DTAP+IPV+HEPB+HIB (INFANRIX HEXA)		3	IM	1	M	0
577875	PNC13	PNEUMO (PREVNAR13)		3	IM	1	M	0
577894	6VAX-F	DTAP+IPV+HEPB+HIB (INFANRIX HEXA)	A21CC219A	3	IM	1.17	M	1
577894	PNC13	PNEUMO (PREVNAR13)	L00733	3	IM	1.17	M	1
577951	HEP	HEP B (NO BRAND NAME)		2	SC		U
578943	6VAX-F	DTAP+IPV+HEPB+HIB (INFANRIX HEXA)	A21CC250A	1	IM	0.17	M	1
578943	PNC13	PNEUMO (PREVNAR13)	J86920	1	IM	0.17	M	1
578943	RV5	ROTAVIRUS (ROTATEQ)	K003497	1	PO	0.17	M	1
581302	RV5	ROTAVIRUS (ROTATEQ)		2	PO	0.33	F	61
583222	6VAX-F	DTAP+IPV+HEPB+HIB (NO BRAND NAME)	L0083	3	IM	0.58	F	0
583222	PNC13	PNEUMO (PREVNAR13)	L00744	3	IM	0.58	F	0
584801	PNC13	PNEUMO (PREVNAR13)		UNK	SC	0.25	U
585458	HEPA	HEP A (HAVRIX)		UNK	IM		F	3
592320	IPV	POLIO VIRUS, INACT. (POLIOVAX)	K01141	UNK	IM	0.17	M	2
595381	DTAP	DTAP (INFANRIX)		UNK	IM		F	21
595381	HEP	HEP B (ENGERIX-B)		UNK	IM		F	21
595381	HIBV	HIB (NO BRAND NAME)		UNK	IM		F	21
595381	IPV	POLIO VIRUS, INACT. (NO BRAND NAME)		UNK	IM		F	21
594963	FLUX	INFLUENZA (SEASONAL) (NO BRAND NAME)		UNK	SYR		F
607651	IPV	POLIO VIRUS, INACT. (POLIOVAX)	K00451	UNK	IM	0.25	M	0
608486	RV5	ROTAVIRUS (ROTATEQ)		2	PO		U
613798	MEN	MENINGOCOCCAL (NO BRAND NAME)		UNK	SYR		M
614524	HIBV	HIB (ACTHIB)	J118011	UNK	UN	0.6	M	0
614932	IPV	POLIO VIRUS, INACT. (IPOL)	J0014	UNK	UN	0.17	M	1
619016	RV5	ROTAVIRUS (ROTATEQ)		2	PO	0.3	U
619091	RV1	ROTAVIRUS (ROTARIX)	AROLB173BA	UNK	PO	0.08	F	14
619240	HEP	HEP B (ENGERIX-B)		UNK	IM		M	10
619241	DTAP	DTAP (INFANRIX)		UNK	IM	0.7	F	4
619241	HEP	HEP B (ENGERIX-B)		UNK	IM	0.7	F	4
620835	DTAPIPVHIB	DTAP + IPV + HIB (INFANRIX QUINTA)		UNK	UN		F	14
620835	PNC13	PNEUMO (PREVNAR13)		UNK	UN		F	14
620835	RV1	ROTAVIRUS (ROTARIX)		UNK	PO		F	14
628883	MENB	MENINGOCOCCAL B (BEXSERO)	145501	UNK	IM		F
629245	DTAPIPV	DTAP + IPV (UNKNOWN)		1	SC	0.4	F
629245	HIBV	HIB (ACTHIB)		3	SC	0.4	F
629245	PNC13	PNEUMO (PREVNAR13)		3	SC	0.4	F
622972	DTPIPV	DTP + IPV (NO BRAND NAME)		2	SC	0.5	F	0
622972	HIBV	HIB (ACTHIB)	L1236	3	SC	0.5	F	0
622972	PNC13	PNEUMO (PREVNAR13)		3	SC	0.5	F	0
630027	DTPIPV	DTP + IPV (NO BRAND NAME)		2	SC	0.5	F
630027	HIBV	HIB (ACTHIB)		3	SC	0.5	F
630027	PNC13	PNEUMO (PREVNAR13)		3	SC	0.5	F
631360	DTPIPV	DTP + IPV (NO BRAND NAME)		UNK	SC		U
631360	PNC13	PNEUMO (PREVNAR13)		UNK	SC		U
633345	6VAX-F	DTAP+IPV+HEPB+HIB (NO BRAND NAME)		UNK	UN	0.6	F	77
633345	MENB	MENINGOCOCCAL B (BEXSERO)	148301	2	IM	0.6	F	77
633345	PNC13	PNEUMO (PREVNAR13)		UNK	UN	0.6	F	77
633816	HEP	HEP B (ENGERIX-B)		UNK	IM		M	13
630801	DTPIPV	DTP + IPV (NO BRAND NAME)	4K11C	2	SC	0.3	F	1
630801	HIBV	HIB (ACTHIB)	L1236	3	SC	0.3	F	1
630801	PNC13	PNEUMO (PREVNAR13)	14J02A	3	SC	0.3	F	1
633482	MENB	MENINGOCOCCAL B (BEXSERO)		UNK	IM		F
633528	MENB	MENINGOCOCCAL B (BEXSERO)		1	IM	0.3	U
635456	DTAP	DTAP (INFANRIX)	A21CC615A	3	UN	0.3	F	5
635456	PNC13	PNEUMO (PREVNAR13)	M10979	2	UN	0.3	F	5
635456	RV5	ROTAVIRUS (ROTATEQ)	L0294940	3	UN	0.3	F	5
642146	6VAX-F	DTAP+IPV+HEPB+HIB (NO BRAND NAME)		3	UN		F
642146	RVX	ROTAVIRUS (NO BRAND NAME)		1	PO		F
637582	HIBV	HIB (ACTHIB)	L1057	1	IM	0.7	M	0
637704	IPV	POLIO VIRUS, INACT. (POLIOVAX)	L0067	1	IM		F	0
643102	RV1	ROTAVIRUS (ROTARIX)		1	PO		M	5
639451	HEP	HEP B (NO BRAND NAME)	Y090A	UNK	SC		M	5
639451	HIBV	HIB (ACTHIB)	L1434	UNK	SC		M	5
639451	PNC13	PNEUMO (PREVNAR13)	14L027A	UNK	SC		M	5
639451	RV1	ROTAVIRUS (ROTARIX)	AROLB221BA	1	PO		M	5
641221	DTPIPV	DTP + IPV (NO BRAND NAME)		UNK	SC		U
641221	HIBV	HIB (ACTHIB)		UNK	SC		U
641221	PNC13	PNEUMO (PREVNAR13)		UNK	UN		U
646391	DTAPIPVHIB	DTAP + IPV + HIB (UNKNOWN)		UNK	UN	0.3	F
646391	MENB	MENINGOCOCCAL B (BEXSERO)		UNK	IM	0.3	F
646391	PNC13	PNEUMO (PREVNAR13)		UNK	UN	0.3	F
650565	MENB	MENINGOCOCCAL B (BEXSERO)	158201B	2	IM	3	F	2
673439	HEP	HEP B (FOREIGN)		1	SC		U
673719	RV1	ROTAVIRUS (ROTARIX)		1	PO	0.17	U
654072	FLUX	INFLUENZA (SEASONAL) (NO BRAND NAME)		UNK	UN		M
674229	MENB	MENINGOCOCCAL B (BEXSERO)		1	IM		F	0
655790	HEP	HEP B (ENGERIX-B)		UNK	IM	0.5	F	9
656216	MENB	MENINGOCOCCAL B (BEXSERO)	15C301A	UNK	IM	0.2	F	13
656302	DTPIPV	DTP + IPV (NO BRAND NAME)		UNK	SC	0.3	F
656302	HIBV	HIB (ACTHIB)		UNK	SC	0.3	F
656302	PNC13	PNEUMO (PREVNAR13)		UNK	SC	0.3	F
674329	DTAPH	DTAP + HIB (NO BRAND NAME)	14H0305	UNK	IM	1.25	M	4
674329	MMR	MEASLES + MUMPS + RUBELLA (MMR II)	D2489	UNK	SC	1.25	M	4
674538	MENB	MENINGOCOCCAL B (BEXSERO)	15A101	UNK	IM	3	F	1
660386	6VAX-F	DTAP+IPV+HEPB+HIB (INFANRIX HEXA)	A21CC688A	2	UN	0.25	F	2
660386	PNC13	PNEUMO (PREVNAR13)	M28768	2	UN	0.25	F	2
660615	6VAX-F	DTAP+IPV+HEPB+HIB (INFANRIX HEXA)	A21CC716A	1	SC	0.2	M
660615	PNC13	PNEUMO (PREVNAR13)	N34834	1	SC	0.2	M
675212	MMR	MEASLES + MUMPS + RUBELLA (MMR II)		UNK	IM		M	28
675212	PNC13	PNEUMO (PREVNAR13)		UNK	IM		M	28
675462	MMR	MEASLES + MUMPS + RUBELLA (NO BRAND NAME)	L018214	UNK	IM	1.2	F
675884	PNC13	PNEUMO (PREVNAR13)		UNK	UN	0.33	U	23
675884	RV1	ROTAVIRUS (ROTARIX)		2	PO	0.33	U	23
675898	HEP	HEP B (ENGERIX-B)		UNK	IM		M	16
676328	DTAPHEPBIP	DTAP + HEPB + IPV (INFANRIX PENTA)	A21CC791A	2	UN	0.25	F
676328	RV1	ROTAVIRUS (ROTARIX)	AROLB504AC	2	PO	0.25	F
676357	MENB	MENINGOCOCCAL B (BEXSERO)	152601A	1	IM	0.17	M	5
677091	DTAPIPVHIB	DTAP + IPV + HIB (INFANRIX QUINTA)		UNK	IM		M	15
677091	PNC13	PNEUMO (PREVNAR13)		UNK	IM		M	15
677091	RV1	ROTAVIRUS (ROTARIX)		UNK	PO		M	15
672974	MMR	MEASLES + MUMPS + RUBELLA (MMR II)		UNK	SC	2	M
675591	DTAP	DTAP (NO BRAND NAME)		UNK	UN	0.3	M
678269	DTAP	DTAP (INFANRIX)		UNK	IM		M	26
678269	PNC13	PNEUMO (PREVNAR13)		UNK	IM		M	26
678269	RV1	ROTAVIRUS (ROTARIX)		UNK	PO		M	26
678307	HEPA	HEP A (HAVRIX)		UNK	IM		F	11
678430	MENB	MENINGOCOCCAL B (BEXSERO)		1	IM		M
681849	6VAX-F	DTAP+IPV+HEPB+HIB (INFANRIX HEXA)	AZ1CC779A	UNK	IM		M	0
681849	PNC13	PNEUMO (PREVNAR13)	N55088	UNK	IM		M	0
681849	RV1	ROTAVIRUS (ROTARIX)	AROLB748AA	UNK	PO		M	0
683265	MENB	MENINGOCOCCAL B (BEXSERO)		1	UN	1.67	F	32
686338	MENB	MENINGOCOCCAL B (BEXSERO)	15A201	2	IM	1.33	F	58
686950	UNK	VACCINE NOT SPECIFIED (NO BRAND NAME)		2	IM	1.67	M	110
688801	MENB	MENINGOCOCCAL B (BEXSERO)	146801	UNK	IM	0.25	M	4
689687	6VAX-F	DTAP+IPV+HEPB+HIB (INFANRIX HEXA)	AZICA405A	UNK	IM	0.25	M	57
689687	PNC	PNEUMO (PREVNAR)	32255	UNK	IM	0.25	M	57
690283	MENB	MENINGOCOCCAL B (BEXSERO)	15B301A	3	IM	0.58	M	19
693268	DTP	DTP (NO BRAND NAME)	20915003B	1	SC		M	0
693268	HEP	HEP B (NO BRAND NAME)	1433016	2	IM		M	0
693268	HIBV	HIB (ACTHIB)	L5480	1	IM		M	0
698086	MENB	MENINGOCOCCAL B (BEXSERO)	15B101A	2	IM	0.67	M	2
701188	PNC13	PNEUMO (PREVNAR13)		1	UN		F
702970	HIBV	HIB (ACTHIB)	M15421M	UNK	IM		F	0
704668	6VAX-F	DTAP+IPV+HEPB+HIB (NO BRAND NAME)	M7383	UNK	UN	0.25	M	5
704668	RV5	ROTAVIRUS (ROTATEQ)	M031795	UNK	PO	0.25	M	5
714469	MENB	MENINGOCOCCAL B (BEXSERO)	15C501	UNK	IM	0.42	M	70
716332	MENB	MENINGOCOCCAL B (BEXSERO)		1	UN		M
719775	MENB	MENINGOCOCCAL B (BEXSERO)		1	IM		M
720978	6VAX-F	DTAP+IPV+HEPB+HIB (NO BRAND NAME)	M7472	UNK	UN	0.33	F	0
720978	MEN	MENINGOCOCCAL (NO BRAND NAME)	161301	UNK	UN	0.33	F	0
720978	PNC13	PNEUMO (PREVNAR13)	R91138	UNK	UN	0.33	F	0
720978	RV5	ROTAVIRUS (ROTATEQ)	M037242	UNK	PO	0.33	F	0
722252	MENB	MENINGOCOCCAL B (BEXSERO)		1	UN		M	62
723064	UNK	VACCINE NOT SPECIFIED (NO BRAND NAME)		UNK	UN	13	F	7
723963	HEPA	HEP A (HAVRIX)	AHABV879AH	1	IM	2	F	4
723963	MMRV	MEASLES + MUMPS + RUBELLA + VARICELLA (NO BRAND NAME)	A71CB161B	1	SC	2	F	4
724464	FLUN4	INFLUENZA (SEASONAL) (FLUENZ TETRA)	HF2075B	UNK	IN	5	F	11
725138	PNC	PNEUMO (PREVNAR)	9431	UNK	IM	0.17	F	21
725170	DTAPIPVHIB	DTAP + IPV + HIB (INFANRIX QUINTA)		1	UN		M
725170	RV1	ROTAVIRUS (ROTARIX)		UNK	PO		M
727967	HEPA	HEP A (HAVRIX)	AHAVB882AB	2	IM	2	M	2
729619	MENB	MENINGOCOCCAL B (BEXSERO)		UNK	UN		M
729619	MMR	MEASLES + MUMPS + RUBELLA (PRIORIX)		UNK	UN		M
729782	HIBV	HIB (ACTHIB)		1	SC		U
730055	PNC13	PNEUMO (PREVNAR13)		4	UN	1	M	223
730515	MENB	MENINGOCOCCAL B (BEXSERO)		UNK			M
730515	MMR	MEASLES + MUMPS + RUBELLA (NO BRAND NAME)		UNK			M
730650	6VAX-F	DTAP+IPV+HEPB+HIB (INFANRIX HEXA)		UNK	OT		M	13
730650	PNC13	PNEUMO (PREVNAR13)		UNK	OT		M	13
730720	MENB	MENINGOCOCCAL B (BEXSERO)		2	UN		F
731827	MENB	MENINGOCOCCAL B (BEXSERO)	167921	2	IM		F	1
732006	6VAX-F	DTAP+IPV+HEPB+HIB (INFANRIX HEXA)	A21FC857B	1	IM		M	2
732006	PNC13	PNEUMO (PREVNAR13)	S06093	UNK	IM		M	2
732320	PNC13	PNEUMO (PREVNAR13)		1	UN	0.17	U	4
732409	6VAX-F	DTAP+IPV+HEPB+HIB (INFANRIX HEXA)		UNK	IM		U
732409	MENB	MENINGOCOCCAL B (BEXSERO)		UNK	IM		U
732409	PNC13	PNEUMO (PREVNAR13)		UNK	IM		U
732413	6VAX-F	DTAP+IPV+HEPB+HIB (INFANRIX HEXA)		UNK	IM		U
732413	MENB	MENINGOCOCCAL B (BEXSERO)		UNK	IM		U
732413	PNC	PNEUMO (PREVNAR)		UNK	IM		U
732419	6VAX-F	DTAP+IPV+HEPB+HIB (INFANRIX HEXA)		UNK	IM		U
732419	MENB	MENINGOCOCCAL B (BEXSERO)		UNK	IM		U
732419	PNC13	PNEUMO (PREVNAR13)		UNK	IM		U
733089	6VAX-F	DTAP+IPV+HEPB+HIB (NO BRAND NAME)		UNK	IM		U
733089	MEN	MENINGOCOCCAL (NO BRAND NAME)		UNK	IM		U
733089	PNC	PNEUMO (PREVNAR)		UNK	IM		U
733210	MENB	MENINGOCOCCAL B (BEXSERO)	159501	2	UN		M	395
734052	RV1	ROTAVIRUS (ROTARIX)		1	PO		F
734206	6VAX-F	DTAP+IPV+HEPB+HIB (INFANRIX HEXA)		UNK	IM		F	18
734206	PNC13	PNEUMO (PREVNAR13)		UNK	IM		F	18
734206	RV1	ROTAVIRUS (ROTARIX)		UNK	PO		F	18
734250	MMR	MEASLES + MUMPS + RUBELLA (NO BRAND NAME)		UNK	IM		F	38
734678	6VAX-F	DTAP+IPV+HEPB+HIB (INFANRIX HEXA)		UNK	IM		U
734678	MEN	MENINGOCOCCAL (NO BRAND NAME)		UNK	IM		U
734678	PNC	PNEUMO (PREVNAR)		UNK	IM		U
734809	6VAX-F	DTAP+IPV+HEPB+HIB (INFANRIX HEXA)		UNK	IM		U
734809	MEN	MENINGOCOCCAL (NO BRAND NAME)		UNK	IM		U
734809	PNC	PNEUMO (PREVNAR)		UNK	IM		U
735832	MENB	MENINGOCOCCAL B (BEXSERO)	149721	UNK	IM	0.25	M	0
737174	MENB	MENINGOCOCCAL B (BEXSERO)	16E401	UNK	IM		F	23
737328	6VAX-F	DTAP+IPV+HEPB+HIB (INFANRIX HEXA)	A21CC939B	UNK	IM		F
737328	PNC13	PNEUMO (PREVNAR13)	530080	UNK	IM		F
737328	RV1	ROTAVIRUS (ROTARIX)	AROLB856AT	UNK	PO		F
737740	6VAX-F	DTAP+IPV+HEPB+HIB (INFANRIX HEXA)	A21CC939B	UNK	OT	0.25	F
737740	PNC13	PNEUMO (PREVNAR13)	S30080	UNK	IM	0.25	F
737740	RV1	ROTAVIRUS (ROTARIX)	AROLB856AT	UNK	PO	0.25	F
738346	MENB	MENINGOCOCCAL B (BEXSERO)		1	UN		M	4
738579	FLU4	INFLUENZA (SEASONAL) (QIV DRESDEN)		UNK	UN	1.5	M	1
739661	MENB	MENINGOCOCCAL B (BEXSERO)	159601A	UNK	UN		M	255
740431	FLUX	INFLUENZA (SEASONAL) (NO BRAND NAME)		UNK	UN		M
739854	VARCEL	VARICELLA (VARIVAX)		UNK	UN		M
739874	6VAX-F	DTAP+IPV+HEPB+HIB (INFANRIX HEXA)		UNK	UN		M	0
739874	PNC13	PNEUMO (PREVNAR13)		UNK	UN		M	0
739874	RV5	ROTAVIRUS (ROTATEQ)		UNK	UN		M	0
739938	MMR	MEASLES + MUMPS + RUBELLA (NO BRAND NAME)		1		1.17	F
739938	PPV	PNEUMO (NO BRAND NAME)		4		1.17	F
739938	VARCEL	VARICELLA (VARIVAX)		1		1.17	F
740233	MMR	MEASLES + MUMPS + RUBELLA (NO BRAND NAME)		UNK			M
740480	RV1	ROTAVIRUS (ROTARIX)		1	PO		M
741120	VARCEL	VARICELLA (VARIVAX)	N029532	1	UN	1	M	19
742935	MENB	MENINGOCOCCAL B (BEXSERO)		UNK	UN		U
743074	MENB	MENINGOCOCCAL B (BEXSERO)	172901A	1	IM	2	M	0
746467	MENB	MENINGOCOCCAL B (BEXSERO)	163301A	UNK	UN	2	M	25
746579	FLU4	INFLUENZA (SEASONAL) (QIV DRESDEN)	AFLBA235BA	UNK	IM		F	2
748627	MENB	MENINGOCOCCAL B (BEXSERO)		UNK	UN		M	0
748849	RV1	ROTAVIRUS (ROTARIX)		UNK	IM		F
749776	FLU4	INFLUENZA (SEASONAL) (QIV DRESDEN)		1	IM		F
750135	HEP	HEP B (ENGERIX-B)		UNK	IM		M	3
750905	PNC13	PNEUMO (PREVNAR13)	S59414R98841	1	UN	0.33	F	0
753361	MENB	MENINGOCOCCAL B (BEXSERO)		3		0.75	M
754200	RV1	ROTAVIRUS (ROTARIX)	AROLB684BM	UNK	OT		U	12
754869	HEP	HEP B (ENGERIX-B)		UNK	IM		U	23
756376	MENB	MENINGOCOCCAL B (BEXSERO)		UNK	IM		U	3
758460	MENB	MENINGOCOCCAL B (BEXSERO)	ABX712AA	1	IM		U	8
758850	FLUX	INFLUENZA (SEASONAL) (NO BRAND NAME)		UNK	IM	1.33	M	1
760379	HEP	HEP B (ENGERIX-B)		2	IM		U
764128	HIBV	HIB (ACTHIB)	M15871M	UNK	UN	1.92	F	1
764634	DTAPIPVHIB	DTAP + IPV + HIB (UNKNOWN)		UNK	UN		U
764634	PPV	PNEUMO (NO BRAND NAME)		UNK	UN		U
772586	MENB	MENINGOCOCCAL B (BEXSERO)		1	UN		U
773139	BCG	BCG (NO BRAND NAME)		UNK	SYR		U	5
773139	HEP	HEP B (ENGERIX-B)		UNK	IM		U	5
774984	MENB	MENINGOCOCCAL B (BEXSERO)	ABX6E3B2	UNK	IM		U	13
777781	HIBV	HIB (ACTHIB)		3	UN		M
777781	PPV	PNEUMO (NO BRAND NAME)		UNK	UN		M
777781	UNK	VACCINE NOT SPECIFIED (NO BRAND NAME)		UNK	UN		M
777819	DTPIPV	DTP + IPV (NO BRAND NAME)		2	SC		M	0
777819	HIBV	HIB (ACTHIB)		3	SC		M	0
777819	PNC13	PNEUMO (PREVNAR13)		3	SC		M	0
778440	FLUX	INFLUENZA (SEASONAL) (NO BRAND NAME)		1	UN	2	M
782310	HEP	HEP B (NO BRAND NAME)		2	SC	0	U	115
784882	DTAPIPV	DTAP + IPV (UNKNOWN)	4K23C	1	OT		F	1
784882	HEP	HEP B (FOREIGN)	N034885	2	OT		F	1
784882	HIBV	HIB (ACTHIB)	N1J98	2	OT		F	1
784882	PNC13	PNEUMO (PREVNAR13)	T73317	1	OT		F	1
784882	RV1	ROTAVIRUS (ROTARIX)	RT005	2	OT		F	1
786234	HEPA	HEP A (HAVRIX)		UNK	IM		F	22
788461	6VAX-F	DTAP+IPV+HEPB+HIB (INFANRIX HEXA)		UNK	UN	0.92	M	0
788461	PNC13	PNEUMO (PREVNAR13)		UNK	UN	0.92	M	0
788544	PNC13	PNEUMO (PREVNAR13)		3	UN	0.42	U
790259	BCG	BCG (NO BRAND NAME)		UNK	ID		M	43
790268	FLUX	INFLUENZA (SEASONAL) (NO BRAND NAME)		UNK	UN	2	M	25
791192	MENB	MENINGOCOCCAL B (BEXSERO)	ABX719AA	1	IM	1.17	M	6
791192	PNC	PNEUMO (PREVNAR)	W48591	UNK	IM	1.17	M	6
792915	FLUN4	INFLUENZA (SEASONAL) (FLUENZ TETRA)		UNK	IN	3	M	1
795049	MENB	MENINGOCOCCAL B (BEXSERO)		UNK	UN		M
795828	MENB	MENINGOCOCCAL B (BEXSERO)	ABX774BA	UNK	IM	3	M	0
796008	HIBV	HIB (ACTHIB)	N1125	4	SC		F	5
796008	MER	MEASLES + RUBELLA (NO BRAND NAME)	Y241	1	SC		F	5
796008	MU	MUMPS (NO BRAND NAME)	G706	1	SC		F	5
796008	PNC13	PNEUMO (PREVNAR13)	W31112	4	SC		F	5
796008	VARCEL	VARICELLA (NO BRAND NAME)	VZ235	1	SC		F	5
797884	MEN	MENINGOCOCCAL (NO BRAND NAME)		1	UN	1.17	M	2
797884	MMR	MEASLES + MUMPS + RUBELLA (NO BRAND NAME)		1	UN	1.17	M	2
799396	MNQ	MENINGOCOCCAL CONJUGATE (MENACTRA)		UNK	IM		F	2
800699	HEP	HEP B (ENGERIX-B)	YHBVC454AA	UNK		0.58	M	6
801541	MENB	MENINGOCOCCAL B (BEXSERO)	ABX764AA	2			U	1
802096	MENB	MENINGOCOCCAL B (BEXSERO)		1		0.67	F	36
808074	BCG	BCG (MYCOBAX)		UNK		6	M
808074	MENB	MENINGOCOCCAL B (BEXSERO)		1		6	M
809485	MENB	MENINGOCOCCAL B (BEXSERO)		1		2	M	0
809603	RV1	ROTAVIRUS (ROTARIX)		1	OT		U
814681	PPV	PNEUMO (PNEUMOVAX)	R021217	UNK	OT		U
814691	MENB	MENINGOCOCCAL B (BEXSERO)	ABX779AC	UNK	OT		M	0
816351	MENB	MENINGOCOCCAL B (BEXSERO)		UNK			U
817875	MENB	MENINGOCOCCAL B (BEXSERO)		1		2	U
819765	6VAX-F	DTAP+IPV+HEPB+HIB (INFANRIX HEXA)	A21CD372A	3	OT		M	8
819765	PNC13	PNEUMO (PREVNAR13)	AF0274	3			M	8
823533	MENB	MENINGOCOCCAL B (BEXSERO)		2		3	M	0
825969	HEP	HEP B (NO BRAND NAME)	201803030	UNK	OT	0.17	F	0
825969	IPV	POLIO VIRUS, INACT. (IPOL)	N3N631M	UNK	OT	0.17	F	0
825970	IPV	POLIO VIRUS, INACT. (NO BRAND NAME)	N3K351	UNK	OT		F	1
825970	MEN	MENINGOCOCCAL (NO BRAND NAME)	20160831-1	UNK	OT		F	1
826048	HIBV	HIB (ACTHIB)	N1D941M	UNK	OT	1.67	F	1
826300	JEV1	JAPANESE ENCEPHALITIS (IXIARO)		UNK	UN	2	M
827921	JEV1	JAPANESE ENCEPHALITIS (IXIARO)	JEV17K62M	UNK	OT		M	14
827921	TYP	TYPHOID VI POLYSACCHARIDE (TYPHIM VI)	R1C812V	UNK	OT		M	14
830687	MENB	MENINGOCOCCAL B (BEXSERO)		3		1.25	U
831646	PNC13	PNEUMO (PREVNAR13)	S59414R98841	UNK		0.33	F	0
831653	MENB	MENINGOCOCCAL B (BEXSERO)	ABX735AD	UNK	OT		U
831710	IPV	POLIO VIRUS, INACT. (POLIOVAX)	N3N731M	1	OT		M	0
831848	PNC13	PNEUMO (PREVNAR13)	W62466W07368	UNK		0.33	F	1
832208	MMRV	MEASLES + MUMPS + RUBELLA + VARICELLA (PROQUAD)		UNK	OT	1.33	M	25
832735	MENB	MENINGOCOCCAL B (BEXSERO)		1			U
835697	PNC13	PNEUMO (PREVNAR13)		1		0.08	U	0
837455	PNC13	PNEUMO (PREVNAR13)	AA0578X37663	3	OT	0.5	U
838149	MENB	MENINGOCOCCAL B (BEXSERO)	148601Y	UNK	OT		F	15
838149	VARCEL	VARICELLA (VARIVAX)		UNK	OT		F	15
839181	MENB	MENINGOCOCCAL B (BEXSERO)		2		6	M	0
839376	MENB	MENINGOCOCCAL B (BEXSERO)	ABX784AC	UNK	OT		M	6
841426	HIBV	HIB (ACTHIB)	P1A351M	4	OT	1.5	M	7
841453	MENB	MENINGOCOCCAL B (BEXSERO)		2		0.42	M
843699	TTOX	TETANUS TOXOID (NO BRAND NAME)		UNK	OT		M
845265	MENB	MENINGOCOCCAL B (BEXSERO)	ABX735AD	UNK	OT		M	29
846925	HEP	HEP B (FOREIGN)		2	OT		U
849973	6VAX-F	DTAP+IPV+HEPB+HIB (INFANRIX HEXA)	A21CD568B	2	OT	0.33	U	0
849973	RV1	ROTAVIRUS (ROTARIX)	AROLC423AB	2	OT	0.33	U	0
850133	RV1	ROTAVIRUS (ROTARIX)		UNK			U
850963	RV1	ROTAVIRUS (ROTARIX)		1	OT		U	61
853207	RV1	ROTAVIRUS (ROTARIX)		1	OT	0.17	M
853207	RV1	ROTAVIRUS (ROTARIX)		2	OT	0.17	M
854872	RV1	ROTAVIRUS (ROTARIX)		2	OT		U	2
856825	MENB	MENINGOCOCCAL B (BEXSERO)	ABX7A4AD	UNK	OT		F	4
858090	DTAPIPVHIB	DTAP + IPV + HIB (UNKNOWN)		UNK			U	77
858090	DTAPIPVHIB	DTAP + IPV + HIB (UNKNOWN)		UNK			U	77
858090	HEP	HEP B (ENGERIX-B)		UNK	OT		U	77
858090	PNC13	PNEUMO (PREVNAR13)		UNK			U	77
860141	MENB	MENINGOCOCCAL B (BEXSERO)		UNK			U
861469	MENB	MENINGOCOCCAL B (BEXSERO)	ABX781AA	UNK	OT		F	9
863991	MENB	MENINGOCOCCAL B (BEXSERO)		UNK	OT		U
863992	MENB	MENINGOCOCCAL B (BEXSERO)		UNK	OT		U
865159	HIBV	HIB (ACTHIB)		UNK	OT	0.33	M
865159	PNC13	PNEUMO (PREVNAR13)		UNK	OT	0.33	M
865160	HIBV	HIB (ACTHIB)		UNK	OT	1	F
865160	PNC13	PNEUMO (PREVNAR13)		UNK	OT	1	F
865414	MENB	MENINGOCOCCAL B (BEXSERO)		UNK	OT		M	10
865438	DTAPIPVHIB	DTAP + IPV + HIB (UNKNOWN)	C5305AB	UNK			M
865438	PNC13	PNEUMO (PREVNAR13)	AK8081	UNK			M
865438	RV5	ROTAVIRUS (ROTATEQ)	N030377	UNK			M
868190	MENB	MENINGOCOCCAL B (BEXSERO)		2		1.17	F
869009	DTAP	DTAP (INFANRIX)	A21CD437A	UNK	OT		M	7
869009	PNC10	PNEUMO (SYNFLORIX)	ASPNB201DF	UNK	OT		M	7
869009	RV1	ROTAVIRUS (ROTARIX)	AROLC268AA	UNK	OT		M	7
869896	PNC13	PNEUMO (PREVNAR13)		2		0.42	U	0
870403	MENB	MENINGOCOCCAL B (BEXSERO)	ABX7A3AB	3	OT		M	52
874855	PNC13	PNEUMO (PREVNAR13)	CD5398AR7666	4		1.17	U
877686	HIBV	HIB (ACTHIB)	P1C97	UNK	OT	1.08	M	5
877686	MER	MEASLES + RUBELLA (NO BRAND NAME)	MR308	UNK	OT	1.08	M	5
877686	PNC13	PNEUMO (PREVNAR13)	AA8482	UNK	OT	1.08	M	5
877686	UNK	VACCINE NOT SPECIFIED (NO BRAND NAME)		UNK	OT	1.08	M	5
877686	UNK	VACCINE NOT SPECIFIED (NO BRAND NAME)	ZUA002A	UNK	OT	1.08	M	5
877686	VARCEL	VARICELLA (NO BRAND NAME)	VZ264	UNK	OT	1.08	M	5
877699	MENB	MENINGOCOCCAL B (BEXSERO)		2	OT		M
877728	DTAPIPVHIB	DTAP + IPV + HIB (UNKNOWN)	C5547AA	3			F
877728	HEP	HEP B (ENGERIX-B)	AHBVC805BD	3			F
877728	RV5	ROTAVIRUS (ROTATEQ)	S005549	3			F
878772	HIBV	HIB (ACTHIB)	P1A351M	UNK	OT	1.5	M	31
878896	UNK	VACCINE NOT SPECIFIED (NO BRAND NAME)	W80362W88032	UNK	OT	0.08	F	0
880944	FLU4	INFLUENZA (SEASONAL) (FLUARIX QUADRIVALENT)	AFLBA361AE	UNK		0.83	M	4
882413	RV1	ROTAVIRUS (ROTARIX)	AROLC721BA	UNK	OT		M	4
885324	MEN	MENINGOCOCCAL (NO BRAND NAME)		UNK			F
885571	HIBV	HIB (ACTHIB)	R1D20	UNK			F
885571	MER	MEASLES + RUBELLA (MR-VAX II)	Y268	1			F
885571	MU	MUMPS (NO BRAND NAME)	2VA017A	1			F
885571	PNC13	PNEUMO (PREVNAR13)	CK7441	UNK			F
885571	VARCEL	VARICELLA (NO BRAND NAME)	VZ285	1			F
885726	HIBV	HIB (ACTHIB)	R1D20	UNK	OT	1	F	1
885726	PNC13	PNEUMO (PREVNAR13)	CK7441	UNK	OT	1	F	1
885726	UNK	VACCINE NOT SPECIFIED (NO BRAND NAME)	ZVA017A	UNK	OT	1	F	1
885726	UNK	VACCINE NOT SPECIFIED (NO BRAND NAME)	Y268	UNK	OT	1	F	1
885726	VARCEL	VARICELLA (NO BRAND NAME)	VZ285	UNK	OT	1	F	1
886251	MENB	MENINGOCOCCAL B (BEXSERO)	ABXAD9AB ?	1			F
886702	PNC13	PNEUMO (PREVNAR13)	DN0361	UNK		0.33	U	5
886702	UNK	VACCINE NOT SPECIFIED (NO BRAND NAME)		UNK		0.33	U	5
889093	DTAP	DTAP (NO BRAND NAME)		2			M
889093	IPV	POLIO VIRUS, INACT. (NO BRAND NAME)		2			M
889213	HEP	HEP B (ENGERIX-B)		UNK			U
889214	DTAPIPVHIB	DTAP + IPV + HIB (UNKNOWN)		UNK			U
889214	RV1	ROTAVIRUS (ROTARIX)		UNK			U
889291	DTAPIPVHIB	DTAP + IPV + HIB (UNKNOWN)		UNK			U	14
889291	RV1	ROTAVIRUS (ROTARIX)		UNK	OT		U	14
890747	DTAPIPVHIB	DTAP + IPV + HIB (UNKNOWN)		UNK			U	3
890747	RV1	ROTAVIRUS (ROTARIX)		UNK	OT		U	3
891026	DTAPIPVHIB	DTAP + IPV + HIB (UNKNOWN)		UNK			U	16
891026	RV1	ROTAVIRUS (ROTARIX)		UNK	OT		U	16
895579	UNK	VACCINE NOT SPECIFIED (NO BRAND NAME)	CD5398AR7666	UNK	OT	0.25	M	0
895580	UNK	VACCINE NOT SPECIFIED (NO BRAND NAME)	AN5245AM6027	UNK	OT	0.42	M	6
895581	PPV	PNEUMO (NO BRAND NAME)		UNK	OT	0.67	F	1
896220	IPV	POLIO VIRUS, INACT. (NO BRAND NAME)	P3K201M	UNK	OT	0.17	M	1
896223	DTAP	DTAP (NO BRAND NAME)	F201908058	UNK	OT	0.33	F	3
896223	IPV	POLIO VIRUS, INACT. (NO BRAND NAME)	P3N011M	UNK	OT	0.33	F	3
896968	RV1	ROTAVIRUS (ROTARIX)	AROLC740AC	UNK	PO		F	16
900159	HEP	HEP B (NO BRAND NAME)	Y117L	1		0.17	M
900159	HIBV	HIB (ACTHIB)	R1E46	1		0.17	M
900159	PNC13	PNEUMO (PREVNAR13)	CW7258	1		0.17	M
900159	RV1	ROTAVIRUS (ROTARIX)	RT014	1	PO	0.17	M
900783	HEP	HEP B (NO BRAND NAME)	Y117L	1			M	1
900783	HIBV	HIB (ACTHIB)	R1E45	1			M	1
900783	PNC13	PNEUMO (PREVNAR13)	CW7258	1			M	1
900783	RV1	ROTAVIRUS (ROTARIX)	RT014	1			M	1
900837	HEP	HEP B (NO BRAND NAME)	Y117L	UNK	OT	0.17	M	1
900837	HIBV	HIB (ACTHIB)	R1E46	UNK	OT	0.17	M	1
900837	PNC13	PNEUMO (PREVNAR13)	CW7258	UNK	OT	0.17	M	1
900837	RV1	ROTAVIRUS (ROTARIX)	RT014	UNK	OT	0.17	M	1
900923	DTAPIPV	DTAP + IPV (INFANRIX TETRA)		UNK	IM		M	12
901278	DTAPIPV	DTAP + IPV (INFANRIX TETRA)	UNK	UNK	IM		M
901278	HIBV	HIB (NO BRAND NAME)	UNK	UNK	IM		M
901278	PPV	PNEUMO (NO BRAND NAME)	UNK	UNK			M
901412	HIBV	HIB (NO BRAND NAME)	UNK	UNK	IM		M	7
902317	DTAPIPV	DTAP + IPV (INFANRIX TETRA)	UNK	UNK	IM		M	10
902317	RVX	ROTAVIRUS (NO BRAND NAME)	UNK	UNK	PO		M	10
904608	MENB	MENINGOCOCCAL B (BEXSERO)		1			M
910414	PNC13	PNEUMO (PREVNAR13)	R0533DA1903	4	OT	1	M	2
920611	RV5	ROTAVIRUS (ROTATEQ)		UNK	OT	0.33	M
952245	DTAP	DTAP (NO BRAND NAME)	201908041-1	UNK	OT	0.33	F	0
952245	IPV	POLIO VIRUS, INACT. (NO BRAND NAME)	R3N141M	UNK	OT	0.33	F	0
958806	UNK	VACCINE NOT SPECIFIED (NO BRAND NAME)	DR0533DA1903	UNK	OT	1	M	0
969499	DTAP	DTAP (NO BRAND NAME)	201908041-1	2	OT	0.33	F
969499	IPV	POLIO VIRUS, INACT. (POLIOVAX)	R3N141M	1	OT	0.33	F
999510	DTAP	DTAP (INFANRIX)	A21CD664B ?	UNK	IM		M
999510	PNC13	PNEUMO (PREVNAR13)	DR5308	UNK	IM		M
1128408	MMR	MEASLES + MUMPS + RUBELLA (MMR II)		UNK	OT		U
1128408	VARCEL	VARICELLA (VARILRIX)		UNK	OT		U
1128408	VARZOS	ZOSTER LIVE (ZOSTAVAX)		UNK	OT		U
1133761	DTAP	DTAP (INFANRIX)		UNK	OT	1	M	6
1133761	HIBV	HIB (ACTHIB)		UNK	OT	1	M	6
1133761	MMRV	MEASLES + MUMPS + RUBELLA + VARICELLA (PROQUAD)		UNK	OT	1	M	6
1288590	RV1	ROTAVIRUS (ROTARIX)	UNK	UNK	PO		U
1288591	RV1	ROTAVIRUS (ROTARIX)	UNK	UNK	PO		U
1298734	RV1	ROTAVIRUS (ROTARIX)	UNK	2	PO		U
1312064	MENB	MENINGOCOCCAL B (BEXSERO)	UNK	1			U
1329624	MENB	MENINGOCOCCAL B (BEXSERO)	UNK	UNK			F
1366044	MENB	MENINGOCOCCAL B (BEXSERO)	UNK	1		0.67	U
1411161	COVID19	COVID19 (COVID19 (PFIZER-BIONTECH))		UNK			M
1445224	MENB	MENINGOCOCCAL B (BEXSERO)	ABXA65AA	1	IM		U	9
1449220	HPV2	HPV (CERVARIX)	AHPVA398AR	UNK			F	1
1468047	COVID19	COVID19 (COVID19 (PFIZER-BIONTECH))		1	OT		M	11
1484350	MENB	MENINGOCOCCAL B (BEXSERO)	ABXB47AA	UNK	IM	0.33	F
1504813	DF	DENGUE TETRAVALENT (DENGVAXIA)		1	OT		M	2
1529631	PNC13	PNEUMO (PREVNAR13)		UNK			M
1583249	MENB	MENINGOCOCCAL B (BEXSERO)	ABXB10AD	2		0.58	F	27
1589808	RV1	ROTAVIRUS (ROTARIX)	UNK	1		0.17	F	30
1701968	6VAX-F	DTAP+IPV+HEPB+HIB (INFANRIX HEXA)		1		0.17	M	30
1701968	PNC13	PNEUMO (PREVNAR13)		1		0.17	M	30
1701968	RV5	ROTAVIRUS (ROTATEQ)		1		0.17	M	30
1716733	COVID19	COVID19 (COVID19 (PFIZER-BIONTECH))	Unknown	1	OT		M	19
1757984	DTAP	DTAP (INFANRIX)	A21CC872A	UNK			M
1757984	MMRV	MEASLES + MUMPS + RUBELLA + VARICELLA (NO BRAND NAME)	A71CB267A	UNK			M
1819145	HEP	HEP B (ENGERIX-B)		3		0.92	M	88
1819145	HEP	HEP B (ENGERIX-B)		2		0.92	M	88
1819145	HEP	HEP B (ENGERIX-B)		1		0.92	M	88
1819145	MMR	MEASLES + MUMPS + RUBELLA (PRIORIX)		UNK		0.92	M	88
1819714	COVID19	COVID19 (COVID19 (PFIZER-BIONTECH))	FJ7489	1		13	M	2
1828192	6VAX-F	DTAP+IPV+HEPB+HIB (NO BRAND NAME)	UNK	UNK			M	23
1828192	FLU4	INFLUENZA (SEASONAL) (FLUARIX QUADRIVALENT)	UNK	1			M	23
1859435	COVID19	COVID19 (COVID19 (PFIZER-BIONTECH))	FG4493	2	OT		M
1866667	COVID19	COVID19 (COVID19 (PFIZER-BIONTECH))		UNK			F
1877630	MNQ	MENINGOCOCCAL CONJUGATE (MENACTRA)	U6885A	UNK	OT	0.92	M	5
1878959	COVID19	COVID19 (COVID19 (PFIZER-BIONTECH))		UNK	OT		M	15
1910565	COVID19	COVID19 (COVID19 (PFIZER-BIONTECH))	FE8405	2			M
1927336	COVID19	COVID19 (COVID19 (PFIZER-BIONTECH))		1			F	18
1945590	PNC13	PNEUMO (PREVNAR13)	EG8726	1			F
1959591	DTAP	DTAP (INFANRIX)		UNK			M	6
1959591	HIBV	HIB (ACTHIB)		UNK			M	6
1959591	MMRV	MEASLES + MUMPS + RUBELLA + VARICELLA (PROQUAD)		UNK			M	6
1976610	COVID19	COVID19 (COVID19 (PFIZER-BIONTECH))	1D020A	2	OT	12	M	62
2003706	COVID19	COVID19 (COVID19 (PFIZER-BIONTECH))	FE9174	2	OT		F	106
2005415	RV1	ROTAVIRUS (ROTARIX)	AROLD072AD	UNK	PO		M
2017224	MENB	MENINGOCOCCAL B (BEXSERO)	UNK	2		0.58	F	537
2081074	COVID19	COVID19 (COVID19 (PFIZER-BIONTECH))		2			U
2084270	MENB	MENINGOCOCCAL B (BEXSERO)	163301	UNK		0.75	F	0
2133763	COVID19	COVID19 (COVID19 (PFIZER-BIONTECH))		1			F	5
2140694	PNC13	PNEUMO (PREVNAR13)	L48815	UNK			M	2232
2149470	COVID19	COVID19 (COVID19 (PFIZER-BIONTECH))		1			M	12
2158935	COVID19	COVID19 (COVID19 (PFIZER-BIONTECH))		UNK			M
2162946	COVID19	COVID19 (COVID19 (PFIZER-BIONTECH))		1			M
2168995	MENB	MENINGOCOCCAL B (BEXSERO)	167921	2	IM	0.92	F
2192725	COVID19	COVID19 (COVID19 (PFIZER-BIONTECH))		1			F	13
2199778	COVID19	COVID19 (COVID19 (PFIZER-BIONTECH))		1			M	35
2246868	PPV	PNEUMO (NO BRAND NAME)	DR7225DW4266	UNK	OT	0.33	M	0
2266458	MMR	MEASLES + MUMPS + RUBELLA (NO BRAND NAME)		UNK			M
2270308	COVID19	COVID19 (COVID19 (PFIZER-BIONTECH))	FP8795	1		12	F	1
2291957	COVID19	COVID19 (COVID19 (PFIZER-BIONTECH))		1			F	1
2293271	COVID19	COVID19 (COVID19 (PFIZER-BIONTECH))		1		7	F	0
2308879	COVID19	COVID19 (COVID19 (PFIZER-BIONTECH))	ACB4692	2	OT	13	M	58
2312277	COVID19	COVID19 (COVID19 (PFIZER-BIONTECH))	FN5988	1		7	F	3
2331298	COVID19	COVID19 (COVID19 (PFIZER-BIONTECH))		UNK			U
2354868	HEP	HEP B (NO BRAND NAME)	T026982	1		0.17	F	3
2354868	HIBV	HIB (NO BRAND NAME)	U1B37	1		0.17	F	3
2354868	PNC13	PNEUMO (PREVNAR13)	FA3038	1		0.17	F	3
2354868	RV1	ROTAVIRUS (ROTARIX)	RT021	1	PO	0.17	F	3
2365759	FLU4	INFLUENZA (SEASONAL) (FLUARIX QUADRIVALENT)	UNK	2			M	13
2366595	MENB	MENINGOCOCCAL B (BEXSERO)	UNK	UNK			F
2386134	COVID19	COVID19 (COVID19 (PFIZER-BIONTECH))	FN9605	3		14	M	34
2395546	DTPIPV	DTP + IPV (NO BRAND NAME)	4K38A	1		0.25	M	1
2395546	HEP	HEP B (NO BRAND NAME)	Y122L	2		0.25	M	1
2395546	HIBV	HIB (ACTHIB)	T1E12	2		0.25	M	1
2395546	PNC13	PNEUMO (PREVNAR13)	EG8873	2		0.25	M	1
2395546	RV1	ROTAVIRUS (ROTARIX)	RT018	2		0.25	M	1
2396965	DTAPIPV	DTAP + IPV (UNKNOWN)	4K38A	UNK	OT	0.25	M	1
2396965	HEP	HEP B (NO BRAND NAME)	Y122L	UNK	OT	0.25	M	1
2396965	HIBV	HIB (ACTHIB)	T1E12	UNK	OT	0.25	M	1
2396965	PNC13	PNEUMO (PREVNAR13)	EG8873	UNK	OT	0.25	M	1
2396965	RV1	ROTAVIRUS (ROTARIX)	RT018	UNK	OT	0.25	M	1
2399848	DTAPIPV	DTAP + IPV (UNKNOWN)	4K38A	1			M	1
2399848	HEP	HEP B (NO BRAND NAME)	Y122L	2			M	1
2399848	HIBV	HIB (ACTHIB)	T1E12	2			M	1
2399848	PNC13	PNEUMO (PREVNAR13)	EG8873	2			M	1
2399848	RV1	ROTAVIRUS (ROTARIX)	RT018	1	OT		M	1
2423592	DTPPVHBHPB	DTAP+IPV+HIB+HEPB (VAXELIS)	U017895	3	OT	1	M	0
2423592	PNC13	PNEUMO (PREVNAR13)	FD3823	3	OT	1	M	0
2428249	RVX	ROTAVIRUS (NO BRAND NAME)	UNK	UNK			M
2439253	COVID19	COVID19 (COVID19 (PFIZER-BIONTECH))		1	OT		F	8
2448756	COVID19	COVID19 (COVID19 (PFIZER-BIONTECH))		1		9	F
2462089	6VAX-F	DTAP+IPV+HEPB+HIB (INFANRIX HEXA)	UNK	UNK			F	13
2462089	PNC13	PNEUMO (PREVNAR13)	UNK	UNK			F	13
2462089	RV1	ROTAVIRUS (ROTARIX)	UNK	UNK			F	13
2462094	DTAPIPV	DTAP + IPV (INFANRIX TETRA)	UNK	UNK			F	10
2464798	PNC13	PNEUMO (PREVNAR13)		UNK		0.17	M
2464798	RV5	ROTAVIRUS (ROTATEQ)	U019707	UNK	OT	0.17	M
2465994	MENB	MENINGOCOCCAL B (BEXSERO)	ABXB10AB	2		0.42	M	279
2484312	COVID19	COVID19 (COVID19 (PFIZER-BIONTECH))		1			F	22
2484654	PNC13	PNEUMO (PREVNAR13)		UNK			F
2490918	HIBV	HIB (ACTHIB)		UNK	OT		U
2498424	RV1	ROTAVIRUS (ROTARIX)	UNK	1		0.17	U
2498577	FLU4	INFLUENZA (SEASONAL) (FLUARIX QUADRIVALENT)	UNK	1		1.75	M	0
2506158	MMR	MEASLES + MUMPS + RUBELLA (NO BRAND NAME)		UNK		1	F
2507423	DTAP	DTAP (INFANRIX)		UNK	OT	1	M
2507423	HIBV	HIB (ACTHIB)		UNK	OT	1	M
2507423	MMRV	MEASLES + MUMPS + RUBELLA + VARICELLA (PROQUAD)		UNK	OT	1	M
2515630	DTAPIPV	DTAP + IPV (UNKNOWN)		1	OT	0.25	F	1
2515630	HEP	HEP B (NO BRAND NAME)	U010774	2	OT	0.25	F	1
2515630	HIBV	HIB (ACTHIB)		2	OT	0.25	F	1
2515630	PNC13	PNEUMO (PREVNAR13)		2	OT	0.25	F	1
2515630	RV5	ROTAVIRUS (ROTATEQ)	U024864	2	OT	0.25	F	1
2515671	DTAPIPV	DTAP + IPV (UNKNOWN)	4K42A	UNK	OT	0.25	F	1
2515671	HEP	HEP B (NO BRAND NAME)	U010774	UNK	OT	0.25	F	1
2515671	HIBV	HIB (ACTHIB)	U1E05	UNK	OT	0.25	F	1
2515671	PNC13	PNEUMO (PREVNAR13)	FN1195	UNK	OT	0.25	F	1
2515671	RV5	ROTAVIRUS (ROTATEQ)	U024864	UNK	OT	0.25	F	1
2528675	6VAX-F	DTAP+IPV+HEPB+HIB (NO BRAND NAME)	UNK	UNK			U
2528675	MEN	MENINGOCOCCAL (NO BRAND NAME)	UNK	UNK			U
2528675	PPV	PNEUMO (NO BRAND NAME)	UNK	UNK			U
2528675	RVX	ROTAVIRUS (NO BRAND NAME)	UNK	UNK			U
2528676	6VAX-F	DTAP+IPV+HEPB+HIB (NO BRAND NAME)	UNK	UNK			U
2528676	FLUX	INFLUENZA (SEASONAL) (NO BRAND NAME)	UNK	UNK			U
2528677	6VAX-F	DTAP+IPV+HEPB+HIB (NO BRAND NAME)	UNK	UNK			U
2528677	MEN	MENINGOCOCCAL (NO BRAND NAME)	UNK	UNK			U
2528678	DTAPIPV	DTAP + IPV (UNKNOWN)	UNK	UNK			U
2528678	HEPAB	HEP A + HEP B (NO BRAND NAME)	UNK	UNK			U
2528679	FLUX	INFLUENZA (SEASONAL) (NO BRAND NAME)	UNK	UNK			U
2528679	MEN	MENINGOCOCCAL (NO BRAND NAME)	UNK	UNK			U
2528679	PPV	PNEUMO (NO BRAND NAME)	UNK	UNK			U
2528679	UNK	VACCINE NOT SPECIFIED (NO BRAND NAME)	UNK	UNK			U
2528680	HEPA	HEP A (NO BRAND NAME)	UNK	UNK			U
2528681	HEPA	HEP A (NO BRAND NAME)	UNK	UNK			U
2528681	UNK	VACCINE NOT SPECIFIED (NO BRAND NAME)	UNK	UNK			U
2528682	HEPAB	HEP A + HEP B (NO BRAND NAME)	UNK	UNK			U
2528683	FLUX	INFLUENZA (SEASONAL) (NO BRAND NAME)	UNK	UNK			U
2528683	PNC13	PNEUMO (PREVNAR13)	UNK	UNK			U
2528684	FLUX	INFLUENZA (SEASONAL) (NO BRAND NAME)	UNK	UNK			U
2528684	MEN	MENINGOCOCCAL (NO BRAND NAME)	UNK	UNK			U
2530473	COVID19	COVID19 (COVID19 (PFIZER-BIONTECH))		1	OT		M	2
2537033	HEPA	HEP A (NO BRAND NAME)		UNK			U
2537033	TYP	TYPHOID LIVE ORAL TY21A (VIVOTIF)		UNK			U
2543018	MMR	MEASLES + MUMPS + RUBELLA (PRIORIX)	UNK	2			M	7
2545037	FLU4	INFLUENZA (SEASONAL) (FLUZONE QUADRIVALENT)	UJ920AA	2	OT	5	M	0
2546164	COVID19	COVID19 (COVID19 (PFIZER-BIONTECH))		1			U
2555664	COVID19	COVID19 (COVID19 (PFIZER-BIONTECH))		1			M	16
2565515	COVID19	COVID19 (COVID19 (PFIZER-BIONTECH))		1			M	35
2575611	VARCEL	VARICELLA (VARIVAX)		UNK		1	F
2581736	MEN	MENINGOCOCCAL (NO BRAND NAME)	SY51000	UNK	IM		M	16
2581736	MENB	MENINGOCOCCAL B (BEXSERO)	UNK	UNK	IM		M	16
2583196	6VAX-F	DTAP+IPV+HEPB+HIB (INFANRIX HEXA)	UNK	1			F	17
2583196	PNC13	PNEUMO (PREVNAR13)	UNK	1			F	17
2583196	RV1	ROTAVIRUS (ROTARIX)	UNK	1			F	17
2583630	COVID19	COVID19 (COVID19 (PFIZER-BIONTECH))		UNK			F
2591676	PNC13	PNEUMO (PREVNAR13)		2			U
2607073	MENB	MENINGOCOCCAL B (BEXSERO)	UNK	UNK			U
2609549	COVID19-2	COVID19 (COVID19 (MODERNA BIVALENT))	026E22A	UNK	OT	8	M	2
2618877	DTAP	DTAP (INFANRIX)	UNK	UNK			M
2618877	HIBV	HIB (ACTHIB)	UNK	UNK			M
2618877	MMRV	MEASLES + MUMPS + RUBELLA + VARICELLA (PROQUAD)	UNK	UNK			M
2620497	MMR	MEASLES + MUMPS + RUBELLA (MMR II)		UNK	OT		U
2620497	UNK	VACCINE NOT SPECIFIED (NO BRAND NAME)		UNK	OT		U
2620497	VARCEL	VARICELLA (VARILRIX)		UNK	OT		U
2620497	VARZOS	ZOSTER LIVE (ZOSTAVAX)		UNK	OT		U
2621254	HEPA	HEP A (VAQTA)		UNK	OT		U
2621254	TYP	TYPHOID LIVE ORAL TY21A (VIVOTIF)		UNK	OT		U
2622638	HEPA	HEP A (VAQTA)		UNK	OT		U
2622638	TYP	TYPHOID LIVE ORAL TY21A (NO BRAND NAME)		UNK	OT		U
2623016	FLUX	INFLUENZA (SEASONAL) (NO BRAND NAME)		UNK			U
2623016	MMR	MEASLES + MUMPS + RUBELLA (MMR II)		UNK			U
2623016	PPV	PNEUMO (NO BRAND NAME)		UNK			U
2623016	UNK	VACCINE NOT SPECIFIED (NO BRAND NAME)		UNK			U
2623016	UNK	VACCINE NOT SPECIFIED (NO BRAND NAME)		UNK			U
2623016	VARCEL	VARICELLA (VARILRIX)		UNK			U
2623016	VARZOS	ZOSTER LIVE (ZOSTAVAX)		UNK			U
2623017	HEPA	HEP A (VAQTA)		UNK	OT		U
2623808	HEPA	HEP A (HAVRIX)		UNK	OT	2	F	3
2623808	TYP	TYPHOID VI POLYSACCHARIDE (TYPHIM VI)		UNK	OT	2	F	3
2624437	HEPA	HEP A (NO BRAND NAME)	UNK	UNK			U
2624437	TYP	TYPHOID LIVE ORAL TY21A (VIVOTIF)	UNK	UNK			U
2632774	MENB	MENINGOCOCCAL B (BEXSERO)	ABXC94AA	UNK	SC	0.33	M	0
2634633	DTAP	DTAP (INFANRIX)	P3K83	UNK			M	1116
2634633	IPV	POLIO VIRUS, INACT. (POLIOVAX)	OPVB901BA	UNK			M	1116
2635310	6VAX-F	DTAP+IPV+HEPB+HIB (NO BRAND NAME)	U3C852V	UNK			M	4
2635310	PNC13	PNEUMO (PREVNAR13)	FJ4075	UNK			M	4
2635310	RV5	ROTAVIRUS (ROTATEQ)	U028830	UNK			M	4
2637251	HEP	HEP B (ENGERIX-B)	UNK	3			F	16
2638174	FLUX	INFLUENZA (SEASONAL) (NO BRAND NAME)		UNK			U
2638174	UNK	VACCINE NOT SPECIFIED (NO BRAND NAME)		UNK			U
2638492	UNK	VACCINE NOT SPECIFIED (NO BRAND NAME)		UNK			U
2638605	MMR	MEASLES + MUMPS + RUBELLA (NO BRAND NAME)	UNK	1		1	F	0
2638605	PPV	PNEUMO (NO BRAND NAME)	UNK	3		1	F	0
2638605	UNK	VACCINE NOT SPECIFIED (NO BRAND NAME)	UNK	UNK		1	F	0
2638606	DTAPIPVHIB	DTAP + IPV + HIB (UNKNOWN)	UNK	2			F	14
2638606	RV1	ROTAVIRUS (ROTARIX)	UNK	2			F	14
2639478	FLUX	INFLUENZA (SEASONAL) (NO BRAND NAME)		UNK			U
2639478	UNK	VACCINE NOT SPECIFIED (NO BRAND NAME)		UNK			U
2639478	UNK	VACCINE NOT SPECIFIED (NO BRAND NAME)		UNK			U
2639478	UNK	VACCINE NOT SPECIFIED (NO BRAND NAME)		UNK			U
2639849	6VAX-F	DTAP+IPV+HEPB+HIB (NO BRAND NAME)	UNK	1			M	20
2639849	RVX	ROTAVIRUS (NO BRAND NAME)	UNK	1			M	20
2640082	DTOX	DIPHTHERIA TOXOIDS (NO BRAND NAME)		UNK			U
2640082	FLUX	INFLUENZA (SEASONAL) (NO BRAND NAME)		UNK			U
2640082	UNK	VACCINE NOT SPECIFIED (NO BRAND NAME)		UNK			U
2640082	UNK	VACCINE NOT SPECIFIED (NO BRAND NAME)		UNK			U
2640082	UNK	VACCINE NOT SPECIFIED (NO BRAND NAME)		UNK			U
2640082	UNK	VACCINE NOT SPECIFIED (NO BRAND NAME)		UNK			U
2640899	DTPPVHBHPB	DTAP+IPV+HIB+HEPB (VAXELIS)		UNK			M
2640899	PNC10	PNEUMO (SYNFLORIX)		UNK			M
2642736	6VAX-F	DTAP+IPV+HEPB+HIB (NO BRAND NAME)	Unknown	UNK	OT		M	1
2642736	PNC13	PNEUMO (PREVNAR13)	Unknown	1	OT		M	1
2643049	FLUX	INFLUENZA (SEASONAL) (NO BRAND NAME)		UNK	OT	0.75	M	24
2646719	FLU4	INFLUENZA (SEASONAL) (FLUARIX QUADRIVALENT)	UNK	UNK			F	25
2648048	MENB	MENINGOCOCCAL B (BEXSERO)	ABX703AA	1	IM	0.58	U	0
2650241	MEN	MENINGOCOCCAL (NO BRAND NAME)	UNK	UNK	IM		F	1
2650241	MENB	MENINGOCOCCAL B (BEXSERO)	ABXD08AA	UNK	IM		F	1
2654175	PPV	PNEUMO (NO BRAND NAME)		1	OT	0.17	M	0
2658224	MENB	MENINGOCOCCAL B (BEXSERO)	ABXD06AB	1	IM	0.25	F	0
2658224	RV5	ROTAVIRUS (ROTATEQ)	WO31290	2		0.25	F	0
2659838	DTAPIPVHIB	DTAP + IPV + HIB (UNKNOWN)	V0C961V	1			F
2659838	PNC13	PNEUMO (PREVNAR13)	GA8902	1			F
2659838	RV5	ROTAVIRUS (ROTATEQ)	W013556	1			F
2660521	DTAPIPVHIB	DTAP + IPV + HIB (UNKNOWN)		1			F	79
2660521	PNC13	PNEUMO (PREVNAR13)		1			F	79
2660521	RV5	ROTAVIRUS (ROTATEQ)	W013556	1	OT		F	79
2663344	RV5	ROTAVIRUS (ROTATEQ)	W004300	1	OT		M	1
2666860	MMR	MEASLES + MUMPS + RUBELLA (PRIORIX)	UNK	UNK			M	4
2666860	UNK	VACCINE NOT SPECIFIED (NO BRAND NAME)	UNK	UNK			M	4
2666862	DTAPIPVHIB	DTAP + IPV + HIB (UNKNOWN)	UNK	UNK			F	7
2666862	FLU4	INFLUENZA (SEASONAL) (FLUARIX QUADRIVALENT)	UNK	UNK			F	7
2689757	HIBV	HIB (ACTHIB)		UNK	OT		U
2692971	HIBV	HIB (NO BRAND NAME)		UNK			M	2
2692971	MU	MUMPS (NO BRAND NAME)		UNK			M	2
2692971	PNC13	PNEUMO (PREVNAR13)	GG1281	UNK			M	2
2692971	UNK	VACCINE NOT SPECIFIED (NO BRAND NAME)		UNK			M	2
2692971	VARCEL	VARICELLA (NO BRAND NAME)		UNK			M	2
2694674	MMR	MEASLES + MUMPS + RUBELLA (NO BRAND NAME)		UNK			F
2694675	MMR	MEASLES + MUMPS + RUBELLA (NO BRAND NAME)		UNK			M
2695164	FLU4	INFLUENZA (SEASONAL) (FLUARIX QUADRIVALENT)	UNK	UNK			M	5
2696919	DTAPIPVHIB	DTAP + IPV + HIB (UNKNOWN)	WOA581M	UNK		0.42	F	15
2696919	RV5	ROTAVIRUS (ROTATEQ)	W024807	3	OT	0.42	F	15
[truncated: 10 more columns]

## Sheet: MIS-C
['Multisystem inflammatory syndrome in children']
Vaccine code report
Vaccine name	Symptoms	Administered	Frequency
COVID19	271	1634153	16
HPV9	1	21735	4
FLU4	3	46657	6
UNK	3	33974	8
FLUC4	1	7019	14
COVID19-2	4	39293	10
HEPA	1	44185	2
TDAP	1	45855	2
DTIPV	1	467	214
MNQ	1	29053	3
CEE	1	53	1886
DTAPIPVHIB	1	12427	8
MMRV	1	20744	4
PNC13	1	41775	2
DTAPIPV	1	13464	7
Vaccine name report
Vaccine name	Symptoms	Administered	Frequency
COVID19 (COVID19 (JANSSEN))	2	98568	2
COVID19 (COVID19 (PFIZER-BIONTECH))	257	965666	26
HPV (GARDASIL 9)	1	21735	4
COVID19 (COVID19 (MODERNA))	9	555712	1
INFLUENZA (SEASONAL) (FLUZONE QUADRIVALENT)	1	16347	6
VACCINE NOT SPECIFIED (NO BRAND NAME)	3	31019	9
INFLUENZA (SEASONAL) (FLUCELVAX QUADRIVALENT)	1	7019	14
COVID19 (COVID19 (UNKNOWN))	3	13824	21
COVID19 (COVID19 (MODERNA BIVALENT))	2	16480	12
COVID19 (COVID19 (PFIZER-BIONTECH BIVALENT))	2	22813	8
HEP A (HAVRIX)	1	24256	4
TDAP (ADACEL)	1	24751	4
DT + IPV (NO BRAND NAME)	1	436	229
MENINGOCOCCAL CONJUGATE (NO BRAND NAME)	1	431	232
FSME-IMMUN. (NO BRAND NAME)	1	53	1886
DTAP + IPV + HIB (UNKNOWN)	1	858	116
MEASLES + MUMPS + RUBELLA + VARICELLA (PROQUAD)	1	20115	4
PNEUMO (PREVNAR13)	1	41775	2
DTAP + IPV (INFANRIX TETRA)	1	914	109
INFLUENZA (SEASONAL) (FLUARIX QUADRIVALENT)	1	11571	8
INFLUENZA (SEASONAL) (AFLURIA QUADRIVALENT)	1	5420	18
Age report:
Age	COVID19	HPV9	FLU4	UNK	FLUC4	COVID19-2	HEPA	TDAP	DTIPV	MNQ	CEE	DTAPIPVHIB	MMRV	PNC13	DTAPIPV
-1	69	0	0	0	0	0	0	0	0	0	1	0	0	0	1
0	0	0	0	0	0	0	0	0	0	0	0	0	0	0	0
1	2	0	1	0	0	0	0	0	0	0	0	1	1	1	0
2	0	0	0	0	0	0	0	0	0	0	0	0	0	0	0
3	2	0	0	0	0	0	0	0	0	0	0	0	0	0	0
4	1	0	0	0	0	0	0	0	0	0	0	0	0	0	0
5	11	0	0	0	0	0	0	0	0	0	0	0	0	0	0
6	4	0	0	0	0	1	0	0	0	0	0	0	0	0	0
7	16	0	0	1	0	0	0	0	0	0	0	0	0	0	0
8	10	0	0	0	0	0	0	0	0	0	0	0	0	0	0
9	13	0	0	0	0	0	0	0	0	0	0	0	0	0	0
10	13	0	2	1	0	0	1	1	0	0	0	0	0	0	0
11	9	0	0	0	1	0	0	0	0	0	0	0	0	0	0
12	19	1	0	0	0	0	0	0	0	0	0	0	0	0	0
13	14	0	0	0	0	0	0	0	0	0	0	0	0	0	0
14	6	0	0	0	0	1	0	0	1	1	0	0	0	0	0
15	10	0	0	1	0	0	0	0	0	0	0	0	0	0	0
16	11	0	0	0	0	0	0	0	0	0	0	0	0	0	0
17	14	0	0	0	0	1	0	0	0	0	0	0	0	0	0
18	1	0	0	0	0	0	0	0	0	0	0	0	0	0	0
19	1	0	0	0	0	0	0	0	0	0	0	0	0	0	0
20	2	0	0	0	0	0	0	0	0	0	0	0	0	0	0
21	0	0	0	0	0	0	0	0	0	0	0	0	0	0	0
22	0	0	0	0	0	0	0	0	0	0	0	0	0	0	0
23	0	0	0	0	0	0	0	0	0	0	0	0	0	0	0
24	0	0	0	0	0	0	0	0	0	0	0	0	0	0	0
25	0	0	0	0	0	0	0	0	0	0	0	0	0	0	0
26	0	0	0	0	0	0	0	0	0	0	0	0	0	0	0
27	0	0	0	0	0	0	0	0	0	0	0	0	0	0	0
28	0	0	0	0	0	0	0	0	0	0	0	0	0	0	0
29	0	0	0	0	0	0	0	0	0	0	0	0	0	0	0
30	0	0	0	0	0	0	0	0	0	0	0	0	0	0	0
31	0	0	0	0	0	0	0	0	0	0	0	0	0	0	0
32	0	0	0	0	0	0	0	0	0	0	0	0	0	0	0
33	1	0	0	0	0	0	0	0	0	0	0	0	0	0	0
34	0	0	0	0	0	0	0	0	0	0	0	0	0	0	0
35	0	0	0	0	0	0	0	0	0	0	0	0	0	0	0
36	0	0	0	0	0	0	0	0	0	0	0	0	0	0	0
37	0	0	0	0	0	0	0	0	0	0	0	0	0	0	0
38	0	0	0	0	0	0	0	0	0	0	0	0	0	0	0
39	0	0	0	0	0	0	0	0	0	0	0	0	0	0	0
40	0	0	0	0	0	0	0	0	0	0	0	0	0	0	0
41	0	0	0	0	0	0	0	0	0	0	0	0	0	0	0
42	1	0	0	0	0	0	0	0	0	0	0	0	0	0	0
43	0	0	0	0	0	0	0	0	0	0	0	0	0	0	0
44	0	0	0	0	0	0	0	0	0	0	0	0	0	0	0
45	0	0	0	0	0	0	0	0	0	0	0	0	0	0	0
46	0	0	0	0	0	0	0	0	0	0	0	0	0	0	0
47	0	0	0	0	0	0	0	0	0	0	0	0	0	0	0
48	0	0	0	0	0	0	0	0	0	0	0	0	0	0	0
49	0	0	0	0	0	0	0	0	0	0	0	0	0	0	0
50	0	0	0	0	0	0	0	0	0	0	0	0	0	0	0
51	0	0	0	0	0	0	0	0	0	0	0	0	0	0	0
52	0	0	0	0	0	0	0	0	0	0	0	0	0	0	0
53	0	0	0	0	0	0	0	0	0	0	0	0	0	0	0
54	0	0	0	0	0	0	0	0	0	0	0	0	0	0	0
55	0	0	0	0	0	0	0	0	0	0	0	0	0	0	0
56	0	0	0	0	0	0	0	0	0	0	0	0	0	0	0
57	0	0	0	0	0	0	0	0	0	0	0	0	0	0	0
58	0	0	0	0	0	0	0	0	0	0	0	0	0	0	0
59	0	0	0	0	0	0	0	0	0	0	0	0	0	0	0
60	0	0	0	0	0	0	0	0	0	0	0	0	0	0	0
61	0	0	0	0	0	1	0	0	0	0	0	0	0	0	0
62	0	0	0	0	0	0	0	0	0	0	0	0	0	0	0
63	1	0	0	0	0	0	0	0	0	0	0	0	0	0	0
64	0	0	0	0	0	0	0	0	0	0	0	0	0	0	0
65	0	0	0	0	0	0	0	0	0	0	0	0	0	0	0
66	0	0	0	0	0	0	0	0	0	0	0	0	0	0	0
67	0	0	0	0	0	0	0	0	0	0	0	0	0	0	0
68	0	0	0	0	0	0	0	0	0	0	0	0	0	0	0
69	0	0	0	0	0	0	0	0	0	0	0	0	0	0	0
70	0	0	0	0	0	0	0	0	0	0	0	0	0	0	0
71	0	0	0	0	0	0	0	0	0	0	0	0	0	0	0
72	0	0	0	0	0	0	0	0	0	0	0	0	0	0	0
73	0	0	0	0	0	0	0	0	0	0	0	0	0	0	0
74	0	0	0	0	0	0	0	0	0	0	0	0	0	0	0
75	1	0	0	0	0	0	0	0	0	0	0	0	0	0	0
76	0	0	0	0	0	0	0	0	0	0	0	0	0	0	0
77	0	0	0	0	0	0	0	0	0	0	0	0	0	0	0
78	0	0	0	0	0	0	0	0	0	0	0	0	0	0	0
79	0	0	0	0	0	0	0	0	0	0	0	0	0	0	0
80	0	0	0	0	0	0	0	0	0	0	0	0	0	0	0
81	0	0	0	0	0	0	0	0	0	0	0	0	0	0	0
82	0	0	0	0	0	0	0	0	0	0	0	0	0	0	0
83	0	0	0	0	0	0	0	0	0	0	0	0	0	0	0
84	0	0	0	0	0	0	0	0	0	0	0	0	0	0	0
85	0	0	0	0	0	0	0	0	0	0	0	0	0	0	0
86	0	0	0	0	0	0	0	0	0	0	0	0	0	0	0
87	0	0	0	0	0	0	0	0	0	0	0	0	0	0	0
88	0	0	0	0	0	0	0	0	0	0	0	0	0	0	0
89	0	0	0	0	0	0	0	0	0	0	0	0	0	0	0
90	0	0	0	0	0	0	0	0	0	0	0	0	0	0	0
91	0	0	0	0	0	0	0	0	0	0	0	0	0	0	0
92	0	0	0	0	0	0	0	0	0	0	0	0	0	0	0
93	0	0	0	0	0	0	0	0	0	0	0	0	0	0	0
94	0	0	0	0	0	0	0	0	0	0	0	0	0	0	0
95	0	0	0	0	0	0	0	0	0	0	0	0	0	0	0
96	0	0	0	0	0	0	0	0	0	0	0	0	0	0	0
97	0	0	0	0	0	0	0	0	0	0	0	0	0	0	0
98	0	0	0	0	0	0	0	0	0	0	0	0	0	0	0
99	0	0	0	0	0	0	0	0	0	0	0	0	0	0	0
100	0	0	0	0	0	0	0	0	0	0	0	0	0	0	0
101	0	0	0	0	0	0	0	0	0	0	0	0	0	0	0
102	0	0	0	0	0	0	0	0	0	0	0	0	0	0	0
103	0	0	0	0	0	0	0	0	0	0	0	0	0	0	0
104	0	0	0	0	0	0	0	0	0	0	0	0	0	0	0
105	0	0	0	0	0	0	0	0	0	0	0	0	0	0	0
106	0	0	0	0	0	0	0	0	0	0	0	0	0	0	0
107	0	0	0	0	0	0	0	0	0	0	0	0	0	0	0
108	0	0	0	0	0	0	0	0	0	0	0	0	0	0	0
109	0	0	0	0	0	0	0	0	0	0	0	0	0	0	0
110	0	0	0	0	0	0	0	0	0	0	0	0	0	0	0
111	0	0	0	0	0	0	0	0	0	0	0	0	0	0	0
112	0	0	0	0	0	0	0	0	0	0	0	0	0	0	0
113	0	0	0	0	0	0	0	0	0	0	0	0	0	0	0
114	0	0	0	0	0	0	0	0	0	0	0	0	0	0	0
115	0	0	0	0	0	0	0	0	0	0	0	0	0	0	0
116	0	0	0	0	0	0	0	0	0	0	0	0	0	0	0
117	0	0	0	0	0	0	0	0	0	0	0	0	0	0	0
118	0	0	0	0	0	0	0	0	0	0	0	0	0	0	0
119	0	0	0	0	0	0	0	0	0	0	0	0	0	0	0
120	0	0	0	0	0	0	0	0	0	0	0	0	0	0	0
Age report: count|total|freq/100K
Age	COVID19	HPV9	FLU4	UNK	FLUC4	COVID19-2	HEPA	TDAP	DTIPV	MNQ	CEE	DTAPIPVHIB	MMRV	PNC13	DTAPIPV
-1	69|477193|14	0|0|0	0|0|0	0|0|0	0|0|0	0|0|0	0|0|0	0|0|0	0|0|0	0|0|0	1|36|2777	0|0|0	0|0|0	0|0|0	1|1535|65
0	0|0|0	0|0|0	0|0|0	0|0|0	0|0|0	0|0|0	0|0|0	0|0|0	0|0|0	0|0|0	0|0|0	0|0|0	0|0|0	0|0|0	0|0|0
1	2|851|235	0|0|0	1|1353|73	0|0|0	0|0|0	0|0|0	0|0|0	0|0|0	0|0|0	0|0|0	0|0|0	1|1922|52	1|3852|25	1|6421|15	0|0|0
2	0|0|0	0|0|0	0|0|0	0|0|0	0|0|0	0|0|0	0|0|0	0|0|0	0|0|0	0|0|0	0|0|0	0|0|0	0|0|0	0|0|0	0|0|0
3	2|865|231	0|0|0	0|0|0	0|0|0	0|0|0	0|0|0	0|0|0	0|0|0	0|0|0	0|0|0	0|0|0	0|0|0	0|0|0	0|0|0	0|0|0
4	1|1071|93	0|0|0	0|0|0	0|0|0	0|0|0	0|0|0	0|0|0	0|0|0	0|0|0	0|0|0	0|0|0	0|0|0	0|0|0	0|0|0	0|0|0
5	11|2751|399	0|0|0	0|0|0	0|0|0	0|0|0	0|0|0	0|0|0	0|0|0	0|0|0	0|0|0	0|0|0	0|0|0	0|0|0	0|0|0	0|0|0
6	4|1921|208	0|0|0	0|0|0	0|0|0	0|0|0	1|219|456	0|0|0	0|0|0	0|0|0	0|0|0	0|0|0	0|0|0	0|0|0	0|0|0	0|0|0
7	16|2117|755	0|0|0	0|0|0	1|73|1369	0|0|0	0|0|0	0|0|0	0|0|0	0|0|0	0|0|0	0|0|0	0|0|0	0|0|0	0|0|0	0|0|0
8	10|2194|455	0|0|0	0|0|0	0|0|0	0|0|0	0|0|0	0|0|0	0|0|0	0|0|0	0|0|0	0|0|0	0|0|0	0|0|0	0|0|0	0|0|0
9	13|2417|537	0|0|0	0|0|0	0|0|0	0|0|0	0|0|0	0|0|0	0|0|0	0|0|0	0|0|0	0|0|0	0|0|0	0|0|0	0|0|0	0|0|0
10	13|2687|483	0|0|0	2|485|412	1|101|990	0|0|0	0|0|0	1|617|162	1|794|125	0|0|0	0|0|0	0|0|0	0|0|0	0|0|0	0|0|0	0|0|0
11	9|3950|227	0|0|0	0|0|0	0|0|0	1|70|1428	0|0|0	0|0|0	0|0|0	0|0|0	0|0|0	0|0|0	0|0|0	0|0|0	0|0|0	0|0|0
12	19|6136|309	1|1853|53	0|0|0	0|0|0	0|0|0	0|0|0	0|0|0	0|0|0	0|0|0	0|0|0	0|0|0	0|0|0	0|0|0	0|0|0	0|0|0
13	14|4862|287	0|0|0	0|0|0	0|0|0	0|0|0	0|0|0	0|0|0	0|0|0	0|0|0	0|0|0	0|0|0	0|0|0	0|0|0	0|0|0	0|0|0
14	6|5306|113	0|0|0	0|0|0	0|0|0	0|0|0	1|198|505	0|0|0	0|0|0	1|37|2702	1|1316|75	0|0|0	0|0|0	0|0|0	0|0|0	0|0|0
15	10|6410|156	0|0|0	0|0|0	1|127|787	0|0|0	0|0|0	0|0|0	0|0|0	0|0|0	0|0|0	0|0|0	0|0|0	0|0|0	0|0|0	0|0|0
16	11|8329|132	0|0|0	0|0|0	0|0|0	0|0|0	0|0|0	0|0|0	0|0|0	0|0|0	0|0|0	0|0|0	0|0|0	0|0|0	0|0|0	0|0|0
17	14|10274|136	0|0|0	0|0|0	0|0|0	0|0|0	1|250|400	0|0|0	0|0|0	0|0|0	0|0|0	0|0|0	0|0|0	0|0|0	0|0|0	0|0|0
18	1|7237|13	0|0|0	0|0|0	0|0|0	0|0|0	0|0|0	0|0|0	0|0|0	0|0|0	0|0|0	0|0|0	0|0|0	0|0|0	0|0|0	0|0|0
19	1|7497|13	0|0|0	0|0|0	0|0|0	0|0|0	0|0|0	0|0|0	0|0|0	0|0|0	0|0|0	0|0|0	0|0|0	0|0|0	0|0|0	0|0|0
20	2|8321|24	0|0|0	0|0|0	0|0|0	0|0|0	0|0|0	0|0|0	0|0|0	0|0|0	0|0|0	0|0|0	0|0|0	0|0|0	0|0|0	0|0|0
21	0|0|0	0|0|0	0|0|0	0|0|0	0|0|0	0|0|0	0|0|0	0|0|0	0|0|0	0|0|0	0|0|0	0|0|0	0|0|0	0|0|0	0|0|0
22	0|0|0	0|0|0	0|0|0	0|0|0	0|0|0	0|0|0	0|0|0	0|0|0	0|0|0	0|0|0	0|0|0	0|0|0	0|0|0	0|0|0	0|0|0
23	0|0|0	0|0|0	0|0|0	0|0|0	0|0|0	0|0|0	0|0|0	0|0|0	0|0|0	0|0|0	0|0|0	0|0|0	0|0|0	0|0|0	0|0|0
24	0|0|0	0|0|0	0|0|0	0|0|0	0|0|0	0|0|0	0|0|0	0|0|0	0|0|0	0|0|0	0|0|0	0|0|0	0|0|0	0|0|0	0|0|0
25	0|0|0	0|0|0	0|0|0	0|0|0	0|0|0	0|0|0	0|0|0	0|0|0	0|0|0	0|0|0	0|0|0	0|0|0	0|0|0	0|0|0	0|0|0
26	0|0|0	0|0|0	0|0|0	0|0|0	0|0|0	0|0|0	0|0|0	0|0|0	0|0|0	0|0|0	0|0|0	0|0|0	0|0|0	0|0|0	0|0|0
27	0|0|0	0|0|0	0|0|0	0|0|0	0|0|0	0|0|0	0|0|0	0|0|0	0|0|0	0|0|0	0|0|0	0|0|0	0|0|0	0|0|0	0|0|0
28	0|0|0	0|0|0	0|0|0	0|0|0	0|0|0	0|0|0	0|0|0	0|0|0	0|0|0	0|0|0	0|0|0	0|0|0	0|0|0	0|0|0	0|0|0
29	0|0|0	0|0|0	0|0|0	0|0|0	0|0|0	0|0|0	0|0|0	0|0|0	0|0|0	0|0|0	0|0|0	0|0|0	0|0|0	0|0|0	0|0|0
30	0|0|0	0|0|0	0|0|0	0|0|0	0|0|0	0|0|0	0|0|0	0|0|0	0|0|0	0|0|0	0|0|0	0|0|0	0|0|0	0|0|0	0|0|0
31	0|0|0	0|0|0	0|0|0	0|0|0	0|0|0	0|0|0	0|0|0	0|0|0	0|0|0	0|0|0	0|0|0	0|0|0	0|0|0	0|0|0	0|0|0
32	0|0|0	0|0|0	0|0|0	0|0|0	0|0|0	0|0|0	0|0|0	0|0|0	0|0|0	0|0|0	0|0|0	0|0|0	0|0|0	0|0|0	0|0|0
33	1|17100|5	0|0|0	0|0|0	0|0|0	0|0|0	0|0|0	0|0|0	0|0|0	0|0|0	0|0|0	0|0|0	0|0|0	0|0|0	0|0|0	0|0|0
34	0|0|0	0|0|0	0|0|0	0|0|0	0|0|0	0|0|0	0|0|0	0|0|0	0|0|0	0|0|0	0|0|0	0|0|0	0|0|0	0|0|0	0|0|0
35	0|0|0	0|0|0	0|0|0	0|0|0	0|0|0	0|0|0	0|0|0	0|0|0	0|0|0	0|0|0	0|0|0	0|0|0	0|0|0	0|0|0	0|0|0
36	0|0|0	0|0|0	0|0|0	0|0|0	0|0|0	0|0|0	0|0|0	0|0|0	0|0|0	0|0|0	0|0|0	0|0|0	0|0|0	0|0|0	0|0|0
37	0|0|0	0|0|0	0|0|0	0|0|0	0|0|0	0|0|0	0|0|0	0|0|0	0|0|0	0|0|0	0|0|0	0|0|0	0|0|0	0|0|0	0|0|0
38	0|0|0	0|0|0	0|0|0	0|0|0	0|0|0	0|0|0	0|0|0	0|0|0	0|0|0	0|0|0	0|0|0	0|0|0	0|0|0	0|0|0	0|0|0
39	0|0|0	0|0|0	0|0|0	0|0|0	0|0|0	0|0|0	0|0|0	0|0|0	0|0|0	0|0|0	0|0|0	0|0|0	0|0|0	0|0|0	0|0|0
40	0|0|0	0|0|0	0|0|0	0|0|0	0|0|0	0|0|0	0|0|0	0|0|0	0|0|0	0|0|0	0|0|0	0|0|0	0|0|0	0|0|0	0|0|0
41	0|0|0	0|0|0	0|0|0	0|0|0	0|0|0	0|0|0	0|0|0	0|0|0	0|0|0	0|0|0	0|0|0	0|0|0	0|0|0	0|0|0	0|0|0
42	1|17539|5	0|0|0	0|0|0	0|0|0	0|0|0	0|0|0	0|0|0	0|0|0	0|0|0	0|0|0	0|0|0	0|0|0	0|0|0	0|0|0	0|0|0
43	0|0|0	0|0|0	0|0|0	0|0|0	0|0|0	0|0|0	0|0|0	0|0|0	0|0|0	0|0|0	0|0|0	0|0|0	0|0|0	0|0|0	0|0|0
44	0|0|0	0|0|0	0|0|0	0|0|0	0|0|0	0|0|0	0|0|0	0|0|0	0|0|0	0|0|0	0|0|0	0|0|0	0|0|0	0|0|0	0|0|0
45	0|0|0	0|0|0	0|0|0	0|0|0	0|0|0	0|0|0	0|0|0	0|0|0	0|0|0	0|0|0	0|0|0	0|0|0	0|0|0	0|0|0	0|0|0
46	0|0|0	0|0|0	0|0|0	0|0|0	0|0|0	0|0|0	0|0|0	0|0|0	0|0|0	0|0|0	0|0|0	0|0|0	0|0|0	0|0|0	0|0|0
47	0|0|0	0|0|0	0|0|0	0|0|0	0|0|0	0|0|0	0|0|0	0|0|0	0|0|0	0|0|0	0|0|0	0|0|0	0|0|0	0|0|0	0|0|0
48	0|0|0	0|0|0	0|0|0	0|0|0	0|0|0	0|0|0	0|0|0	0|0|0	0|0|0	0|0|0	0|0|0	0|0|0	0|0|0	0|0|0	0|0|0
49	0|0|0	0|0|0	0|0|0	0|0|0	0|0|0	0|0|0	0|0|0	0|0|0	0|0|0	0|0|0	0|0|0	0|0|0	0|0|0	0|0|0	0|0|0
50	0|0|0	0|0|0	0|0|0	0|0|0	0|0|0	0|0|0	0|0|0	0|0|0	0|0|0	0|0|0	0|0|0	0|0|0	0|0|0	0|0|0	0|0|0
51	0|0|0	0|0|0	0|0|0	0|0|0	0|0|0	0|0|0	0|0|0	0|0|0	0|0|0	0|0|0	0|0|0	0|0|0	0|0|0	0|0|0	0|0|0
52	0|0|0	0|0|0	0|0|0	0|0|0	0|0|0	0|0|0	0|0|0	0|0|0	0|0|0	0|0|0	0|0|0	0|0|0	0|0|0	0|0|0	0|0|0
53	0|0|0	0|0|0	0|0|0	0|0|0	0|0|0	0|0|0	0|0|0	0|0|0	0|0|0	0|0|0	0|0|0	0|0|0	0|0|0	0|0|0	0|0|0
54	0|0|0	0|0|0	0|0|0	0|0|0	0|0|0	0|0|0	0|0|0	0|0|0	0|0|0	0|0|0	0|0|0	0|0|0	0|0|0	0|0|0	0|0|0
55	0|0|0	0|0|0	0|0|0	0|0|0	0|0|0	0|0|0	0|0|0	0|0|0	0|0|0	0|0|0	0|0|0	0|0|0	0|0|0	0|0|0	0|0|0
56	0|0|0	0|0|0	0|0|0	0|0|0	0|0|0	0|0|0	0|0|0	0|0|0	0|0|0	0|0|0	0|0|0	0|0|0	0|0|0	0|0|0	0|0|0
57	0|0|0	0|0|0	0|0|0	0|0|0	0|0|0	0|0|0	0|0|0	0|0|0	0|0|0	0|0|0	0|0|0	0|0|0	0|0|0	0|0|0	0|0|0
58	0|0|0	0|0|0	0|0|0	0|0|0	0|0|0	0|0|0	0|0|0	0|0|0	0|0|0	0|0|0	0|0|0	0|0|0	0|0|0	0|0|0	0|0|0
59	0|0|0	0|0|0	0|0|0	0|0|0	0|0|0	0|0|0	0|0|0	0|0|0	0|0|0	0|0|0	0|0|0	0|0|0	0|0|0	0|0|0	0|0|0
60	0|0|0	0|0|0	0|0|0	0|0|0	0|0|0	0|0|0	0|0|0	0|0|0	0|0|0	0|0|0	0|0|0	0|0|0	0|0|0	0|0|0	0|0|0
61	0|0|0	0|0|0	0|0|0	0|0|0	0|0|0	1|657|152	0|0|0	0|0|0	0|0|0	0|0|0	0|0|0	0|0|0	0|0|0	0|0|0	0|0|0
62	0|0|0	0|0|0	0|0|0	0|0|0	0|0|0	0|0|0	0|0|0	0|0|0	0|0|0	0|0|0	0|0|0	0|0|0	0|0|0	0|0|0	0|0|0
63	1|17448|5	0|0|0	0|0|0	0|0|0	0|0|0	0|0|0	0|0|0	0|0|0	0|0|0	0|0|0	0|0|0	0|0|0	0|0|0	0|0|0	0|0|0
64	0|0|0	0|0|0	0|0|0	0|0|0	0|0|0	0|0|0	0|0|0	0|0|0	0|0|0	0|0|0	0|0|0	0|0|0	0|0|0	0|0|0	0|0|0
65	0|0|0	0|0|0	0|0|0	0|0|0	0|0|0	0|0|0	0|0|0	0|0|0	0|0|0	0|0|0	0|0|0	0|0|0	0|0|0	0|0|0	0|0|0
66	0|0|0	0|0|0	0|0|0	0|0|0	0|0|0	0|0|0	0|0|0	0|0|0	0|0|0	0|0|0	0|0|0	0|0|0	0|0|0	0|0|0	0|0|0
67	0|0|0	0|0|0	0|0|0	0|0|0	0|0|0	0|0|0	0|0|0	0|0|0	0|0|0	0|0|0	0|0|0	0|0|0	0|0|0	0|0|0	0|0|0
68	0|0|0	0|0|0	0|0|0	0|0|0	0|0|0	0|0|0	0|0|0	0|0|0	0|0|0	0|0|0	0|0|0	0|0|0	0|0|0	0|0|0	0|0|0
69	0|0|0	0|0|0	0|0|0	0|0|0	0|0|0	0|0|0	0|0|0	0|0|0	0|0|0	0|0|0	0|0|0	0|0|0	0|0|0	0|0|0	0|0|0
70	0|0|0	0|0|0	0|0|0	0|0|0	0|0|0	0|0|0	0|0|0	0|0|0	0|0|0	0|0|0	0|0|0	0|0|0	0|0|0	0|0|0	0|0|0
71	0|0|0	0|0|0	0|0|0	0|0|0	0|0|0	0|0|0	0|0|0	0|0|0	0|0|0	0|0|0	0|0|0	0|0|0	0|0|0	0|0|0	0|0|0
72	0|0|0	0|0|0	0|0|0	0|0|0	0|0|0	0|0|0	0|0|0	0|0|0	0|0|0	0|0|0	0|0|0	0|0|0	0|0|0	0|0|0	0|0|0
73	0|0|0	0|0|0	0|0|0	0|0|0	0|0|0	0|0|0	0|0|0	0|0|0	0|0|0	0|0|0	0|0|0	0|0|0	0|0|0	0|0|0	0|0|0
74	0|0|0	0|0|0	0|0|0	0|0|0	0|0|0	0|0|0	0|0|0	0|0|0	0|0|0	0|0|0	0|0|0	0|0|0	0|0|0	0|0|0	0|0|0
75	1|11541|8	0|0|0	0|0|0	0|0|0	0|0|0	0|0|0	0|0|0	0|0|0	0|0|0	0|0|0	0|0|0	0|0|0	0|0|0	0|0|0	0|0|0
76	0|0|0	0|0|0	0|0|0	0|0|0	0|0|0	0|0|0	0|0|0	0|0|0	0|0|0	0|0|0	0|0|0	0|0|0	0|0|0	0|0|0	0|0|0
77	0|0|0	0|0|0	0|0|0	0|0|0	0|0|0	0|0|0	0|0|0	0|0|0	0|0|0	0|0|0	0|0|0	0|0|0	0|0|0	0|0|0	0|0|0
78	0|0|0	0|0|0	0|0|0	0|0|0	0|0|0	0|0|0	0|0|0	0|0|0	0|0|0	0|0|0	0|0|0	0|0|0	0|0|0	0|0|0	0|0|0
79	0|0|0	0|0|0	0|0|0	0|0|0	0|0|0	0|0|0	0|0|0	0|0|0	0|0|0	0|0|0	0|0|0	0|0|0	0|0|0	0|0|0	0|0|0
80	0|0|0	0|0|0	0|0|0	0|0|0	0|0|0	0|0|0	0|0|0	0|0|0	0|0|0	0|0|0	0|0|0	0|0|0	0|0|0	0|0|0	0|0|0
81	0|0|0	0|0|0	0|0|0	0|0|0	0|0|0	0|0|0	0|0|0	0|0|0	0|0|0	0|0|0	0|0|0	0|0|0	0|0|0	0|0|0	0|0|0
82	0|0|0	0|0|0	0|0|0	0|0|0	0|0|0	0|0|0	0|0|0	0|0|0	0|0|0	0|0|0	0|0|0	0|0|0	0|0|0	0|0|0	0|0|0
83	0|0|0	0|0|0	0|0|0	0|0|0	0|0|0	0|0|0	0|0|0	0|0|0	0|0|0	0|0|0	0|0|0	0|0|0	0|0|0	0|0|0	0|0|0
84	0|0|0	0|0|0	0|0|0	0|0|0	0|0|0	0|0|0	0|0|0	0|0|0	0|0|0	0|0|0	0|0|0	0|0|0	0|0|0	0|0|0	0|0|0
85	0|0|0	0|0|0	0|0|0	0|0|0	0|0|0	0|0|0	0|0|0	0|0|0	0|0|0	0|0|0	0|0|0	0|0|0	0|0|0	0|0|0	0|0|0
86	0|0|0	0|0|0	0|0|0	0|0|0	0|0|0	0|0|0	0|0|0	0|0|0	0|0|0	0|0|0	0|0|0	0|0|0	0|0|0	0|0|0	0|0|0
87	0|0|0	0|0|0	0|0|0	0|0|0	0|0|0	0|0|0	0|0|0	0|0|0	0|0|0	0|0|0	0|0|0	0|0|0	0|0|0	0|0|0	0|0|0
88	0|0|0	0|0|0	0|0|0	0|0|0	0|0|0	0|0|0	0|0|0	0|0|0	0|0|0	0|0|0	0|0|0	0|0|0	0|0|0	0|0|0	0|0|0
89	0|0|0	0|0|0	0|0|0	0|0|0	0|0|0	0|0|0	0|0|0	0|0|0	0|0|0	0|0|0	0|0|0	0|0|0	0|0|0	0|0|0	0|0|0
90	0|0|0	0|0|0	0|0|0	0|0|0	0|0|0	0|0|0	0|0|0	0|0|0	0|0|0	0|0|0	0|0|0	0|0|0	0|0|0	0|0|0	0|0|0
91	0|0|0	0|0|0	0|0|0	0|0|0	0|0|0	0|0|0	0|0|0	0|0|0	0|0|0	0|0|0	0|0|0	0|0|0	0|0|0	0|0|0	0|0|0
92	0|0|0	0|0|0	0|0|0	0|0|0	0|0|0	0|0|0	0|0|0	0|0|0	0|0|0	0|0|0	0|0|0	0|0|0	0|0|0	0|0|0	0|0|0
93	0|0|0	0|0|0	0|0|0	0|0|0	0|0|0	0|0|0	0|0|0	0|0|0	0|0|0	0|0|0	0|0|0	0|0|0	0|0|0	0|0|0	0|0|0
94	0|0|0	0|0|0	0|0|0	0|0|0	0|0|0	0|0|0	0|0|0	0|0|0	0|0|0	0|0|0	0|0|0	0|0|0	0|0|0	0|0|0	0|0|0
95	0|0|0	0|0|0	0|0|0	0|0|0	0|0|0	0|0|0	0|0|0	0|0|0	0|0|0	0|0|0	0|0|0	0|0|0	0|0|0	0|0|0	0|0|0
96	0|0|0	0|0|0	0|0|0	0|0|0	0|0|0	0|0|0	0|0|0	0|0|0	0|0|0	0|0|0	0|0|0	0|0|0	0|0|0	0|0|0	0|0|0
97	0|0|0	0|0|0	0|0|0	0|0|0	0|0|0	0|0|0	0|0|0	0|0|0	0|0|0	0|0|0	0|0|0	0|0|0	0|0|0	0|0|0	0|0|0
98	0|0|0	0|0|0	0|0|0	0|0|0	0|0|0	0|0|0	0|0|0	0|0|0	0|0|0	0|0|0	0|0|0	0|0|0	0|0|0	0|0|0	0|0|0
99	0|0|0	0|0|0	0|0|0	0|0|0	0|0|0	0|0|0	0|0|0	0|0|0	0|0|0	0|0|0	0|0|0	0|0|0	0|0|0	0|0|0	0|0|0
100	0|0|0	0|0|0	0|0|0	0|0|0	0|0|0	0|0|0	0|0|0	0|0|0	0|0|0	0|0|0	0|0|0	0|0|0	0|0|0	0|0|0	0|0|0
101	0|0|0	0|0|0	0|0|0	0|0|0	0|0|0	0|0|0	0|0|0	0|0|0	0|0|0	0|0|0	0|0|0	0|0|0	0|0|0	0|0|0	0|0|0
102	0|0|0	0|0|0	0|0|0	0|0|0	0|0|0	0|0|0	0|0|0	0|0|0	0|0|0	0|0|0	0|0|0	0|0|0	0|0|0	0|0|0	0|0|0
103	0|0|0	0|0|0	0|0|0	0|0|0	0|0|0	0|0|0	0|0|0	0|0|0	0|0|0	0|0|0	0|0|0	0|0|0	0|0|0	0|0|0	0|0|0
104	0|0|0	0|0|0	0|0|0	0|0|0	0|0|0	0|0|0	0|0|0	0|0|0	0|0|0	0|0|0	0|0|0	0|0|0	0|0|0	0|0|0	0|0|0
105	0|0|0	0|0|0	0|0|0	0|0|0	0|0|0	0|0|0	0|0|0	0|0|0	0|0|0	0|0|0	0|0|0	0|0|0	0|0|0	0|0|0	0|0|0
106	0|0|0	0|0|0	0|0|0	0|0|0	0|0|0	0|0|0	0|0|0	0|0|0	0|0|0	0|0|0	0|0|0	0|0|0	0|0|0	0|0|0	0|0|0
107	0|0|0	0|0|0	0|0|0	0|0|0	0|0|0	0|0|0	0|0|0	0|0|0	0|0|0	0|0|0	0|0|0	0|0|0	0|0|0	0|0|0	0|0|0
108	0|0|0	0|0|0	0|0|0	0|0|0	0|0|0	0|0|0	0|0|0	0|0|0	0|0|0	0|0|0	0|0|0	0|0|0	0|0|0	0|0|0	0|0|0
109	0|0|0	0|0|0	0|0|0	0|0|0	0|0|0	0|0|0	0|0|0	0|0|0	0|0|0	0|0|0	0|0|0	0|0|0	0|0|0	0|0|0	0|0|0
110	0|0|0	0|0|0	0|0|0	0|0|0	0|0|0	0|0|0	0|0|0	0|0|0	0|0|0	0|0|0	0|0|0	0|0|0	0|0|0	0|0|0	0|0|0
111	0|0|0	0|0|0	0|0|0	0|0|0	0|0|0	0|0|0	0|0|0	0|0|0	0|0|0	0|0|0	0|0|0	0|0|0	0|0|0	0|0|0	0|0|0
112	0|0|0	0|0|0	0|0|0	0|0|0	0|0|0	0|0|0	0|0|0	0|0|0	0|0|0	0|0|0	0|0|0	0|0|0	0|0|0	0|0|0	0|0|0
113	0|0|0	0|0|0	0|0|0	0|0|0	0|0|0	0|0|0	0|0|0	0|0|0	0|0|0	0|0|0	0|0|0	0|0|0	0|0|0	0|0|0	0|0|0
114	0|0|0	0|0|0	0|0|0	0|0|0	0|0|0	0|0|0	0|0|0	0|0|0	0|0|0	0|0|0	0|0|0	0|0|0	0|0|0	0|0|0	0|0|0
115	0|0|0	0|0|0	0|0|0	0|0|0	0|0|0	0|0|0	0|0|0	0|0|0	0|0|0	0|0|0	0|0|0	0|0|0	0|0|0	0|0|0	0|0|0
116	0|0|0	0|0|0	0|0|0	0|0|0	0|0|0	0|0|0	0|0|0	0|0|0	0|0|0	0|0|0	0|0|0	0|0|0	0|0|0	0|0|0	0|0|0
117	0|0|0	0|0|0	0|0|0	0|0|0	0|0|0	0|0|0	0|0|0	0|0|0	0|0|0	0|0|0	0|0|0	0|0|0	0|0|0	0|0|0	0|0|0
118	0|0|0	0|0|0	0|0|0	0|0|0	0|0|0	0|0|0	0|0|0	0|0|0	0|0|0	0|0|0	0|0|0	0|0|0	0|0|0	0|0|0	0|0|0
119	0|0|0	0|0|0	0|0|0	0|0|0	0|0|0	0|0|0	0|0|0	0|0|0	0|0|0	0|0|0	0|0|0	0|0|0	0|0|0	0|0|0	0|0|0
120	0|0|0	0|0|0	0|0|0	0|0|0	0|0|0	0|0|0	0|0|0	0|0|0	0|0|0	0|0|0	0|0|0	0|0|0	0|0|0	0|0|0	0|0|0
Onset report:
Onset	COVID19	HPV9	FLU4	UNK	FLUC4	COVID19-2	HEPA	TDAP	DTIPV	MNQ	CEE	DTAPIPVHIB	MMRV	PNC13	DTAPIPV
-1	43		1	2								1	1	1
0	17		1		1	2			1	1
1	13		1
2	6
3	4
4	5
5	7
6	6
7	4
8	5
9	1
10	2					1
11	1
12	3
13	4	1
14
15	4										1
16	3
17							1	1
18	4
19	1			1
20	3
21	5
22	3					1
23	1
24
25	1
26	4
27	3
28	1
29	3
30
31	4
32	1														1
33	2
34	2
35
36	1
37	1
38	1
39	5
40	1
41
42
43	3
44	1
45
46
47	1
48	2
49
50
51	1
52	3
53
54	2
55
56	3
57	1
58	1
59
60	1
61
62
63
64
65
66
67	1
68
69	3
70
71
72
73	1
74	1
75
76
77
78	3
79
80	3
81
82
83	1
84
85
86
87
88
89	1
90
91	1
92	1
93
94	1
95
96	1
97	1
98
99
100
101
102
103	1
104	1
105
106
107
108
109
110
111
112
113
114
115
116
117
118
119	1
120
Shots report:
Shots	COVID19	HPV9	FLU4	UNK	FLUC4	COVID19-2	HEPA	TDAP	DTIPV	MNQ	CEE	DTAPIPVHIB	MMRV	PNC13	DTAPIPV
1	194	1	3	3		3					1				1
2	36				1		1	1	1	1
3	1											1	1	1
4	1					1
5
6
7
8
9
10
11
12
13
14
15
16
17
18
19
20
21
22
23
24
25
Shots frequency report: count|total|frequency/100K
Shots	COVID19	HPV9	FLU4	UNK	FLUC4	COVID19-2	HEPA	TDAP	DTIPV	MNQ	CEE	DTAPIPVHIB	MMRV	PNC13	DTAPIPV
1	194|1496895|12	1|14436|6	3|32190|9	3|17959|16	|0|0	3|34155|8	|0|0	|0|0	|0|0	|0|0	1|30|3333	|0|0	|0|0	|0|0	1|4062|24
2	36|59519|60	|0|0	|0|0	|0|0	1|1353|73	|0|0	1|9489|10	1|11464|8	1|241|414	1|8415|11	|0|0	|0|0	|0|0	|0|0	|0|0
3	1|8740|11	|0|0	|0|0	|0|0	|0|0	|0|0	|0|0	|0|0	|0|0	|0|0	|0|0	1|3911|25	1|2974|33	1|7967|12	|0|0
4	1|1587|63	|0|0	|0|0	|0|0	|0|0	1|329|303	|0|0	|0|0	|0|0	|0|0	|0|0	|0|0	|0|0	|0|0	|0|0
5	|0|0	|0|0	|0|0	|0|0	|0|0	|0|0	|0|0	|0|0	|0|0	|0|0	|0|0	|0|0	|0|0	|0|0	|0|0
6	|0|0	|0|0	|0|0	|0|0	|0|0	|0|0	|0|0	|0|0	|0|0	|0|0	|0|0	|0|0	|0|0	|0|0	|0|0
7	|0|0	|0|0	|0|0	|0|0	|0|0	|0|0	|0|0	|0|0	|0|0	|0|0	|0|0	|0|0	|0|0	|0|0	|0|0
8	|0|0	|0|0	|0|0	|0|0	|0|0	|0|0	|0|0	|0|0	|0|0	|0|0	|0|0	|0|0	|0|0	|0|0	|0|0
9	|0|0	|0|0	|0|0	|0|0	|0|0	|0|0	|0|0	|0|0	|0|0	|0|0	|0|0	|0|0	|0|0	|0|0	|0|0
10	|0|0	|0|0	|0|0	|0|0	|0|0	|0|0	|0|0	|0|0	|0|0	|0|0	|0|0	|0|0	|0|0	|0|0	|0|0
11	|0|0	|0|0	|0|0	|0|0	|0|0	|0|0	|0|0	|0|0	|0|0	|0|0	|0|0	|0|0	|0|0	|0|0	|0|0
12	|0|0	|0|0	|0|0	|0|0	|0|0	|0|0	|0|0	|0|0	|0|0	|0|0	|0|0	|0|0	|0|0	|0|0	|0|0
13	|0|0	|0|0	|0|0	|0|0	|0|0	|0|0	|0|0	|0|0	|0|0	|0|0	|0|0	|0|0	|0|0	|0|0	|0|0
14	|0|0	|0|0	|0|0	|0|0	|0|0	|0|0	|0|0	|0|0	|0|0	|0|0	|0|0	|0|0	|0|0	|0|0	|0|0
15	|0|0	|0|0	|0|0	|0|0	|0|0	|0|0	|0|0	|0|0	|0|0	|0|0	|0|0	|0|0	|0|0	|0|0	|0|0
16	|0|0	|0|0	|0|0	|0|0	|0|0	|0|0	|0|0	|0|0	|0|0	|0|0	|0|0	|0|0	|0|0	|0|0	|0|0
17	|0|0	|0|0	|0|0	|0|0	|0|0	|0|0	|0|0	|0|0	|0|0	|0|0	|0|0	|0|0	|0|0	|0|0	|0|0
18	|0|0	|0|0	|0|0	|0|0	|0|0	|0|0	|0|0	|0|0	|0|0	|0|0	|0|0	|0|0	|0|0	|0|0	|0|0
19	|0|0	|0|0	|0|0	|0|0	|0|0	|0|0	|0|0	|0|0	|0|0	|0|0	|0|0	|0|0	|0|0	|0|0	|0|0
20	|0|0	|0|0	|0|0	|0|0	|0|0	|0|0	|0|0	|0|0	|0|0	|0|0	|0|0	|0|0	|0|0	|0|0	|0|0
21	|0|0	|0|0	|0|0	|0|0	|0|0	|0|0	|0|0	|0|0	|0|0	|0|0	|0|0	|0|0	|0|0	|0|0	|0|0
22	|0|0	|0|0	|0|0	|0|0	|0|0	|0|0	|0|0	|0|0	|0|0	|0|0	|0|0	|0|0	|0|0	|0|0	|0|0
23	|0|0	|0|0	|0|0	|0|0	|0|0	|0|0	|0|0	|0|0	|0|0	|0|0	|0|0	|0|0	|0|0	|0|0	|0|0
24	|0|0	|0|0	|0|0	|0|0	|0|0	|0|0	|0|0	|0|0	|0|0	|0|0	|0|0	|0|0	|0|0	|0|0	|0|0
25	|0|0	|0|0	|0|0	|0|0	|0|0	|0|0	|0|0	|0|0	|0|0	|0|0	|0|0	|0|0	|0|0	|0|0	|0|0
Details report:
VAERS ID	Vaccine Code	Vaccine Name	Vax lot	Vax series	Vax route	Age	Gender	Onset
1139040	COVID19	COVID19 (COVID19 (JANSSEN))		1	IM	20	F	0
1282242	COVID19	COVID19 (COVID19 (PFIZER-BIONTECH))	ER8735	1	IM	16	F	10
1283374	COVID19	COVID19 (COVID19 (PFIZER-BIONTECH))		1	SYR	42	M	1
1289076	COVID19	COVID19 (COVID19 (PFIZER-BIONTECH))		1	IM	20	F	7
1324803	COVID19	COVID19 (COVID19 (PFIZER-BIONTECH))		1		17	F	20
1338829	COVID19	COVID19 (COVID19 (PFIZER-BIONTECH))		1	IM	12	M	1
1342270	COVID19	COVID19 (COVID19 (PFIZER-BIONTECH))	EW0185	1	IM	13	F	1
1348070	COVID19	COVID19 (COVID19 (PFIZER-BIONTECH))	EW0179	1	IM	17	M	6
1361652	COVID19	COVID19 (COVID19 (PFIZER-BIONTECH))	EW0172	1	SYR	14	F	5
1382338	COVID19	COVID19 (COVID19 (PFIZER-BIONTECH))	EW0217	1	IM	12	M	2
1388206	COVID19	COVID19 (COVID19 (PFIZER-BIONTECH))	EW0177	1	IM	13	M	1
1392424	COVID19	COVID19 (COVID19 (PFIZER-BIONTECH))	774-442-3947	1	SYR	18	F	104
1392424	COVID19	COVID19 (COVID19 (PFIZER-BIONTECH))	774-442-3947	2	SYR	18	F	104
1400623	COVID19	COVID19 (COVID19 (PFIZER-BIONTECH))	EW0167	1	IM	16	M	11
1414580	COVID19	COVID19 (COVID19 (PFIZER-BIONTECH))		UNK		13	M	2
1428800	COVID19	COVID19 (COVID19 (PFIZER-BIONTECH))	EW0178	2		12	F	5
1486316	COVID19	COVID19 (COVID19 (PFIZER-BIONTECH))		1			M	4
1489821	COVID19	COVID19 (COVID19 (PFIZER-BIONTECH))	EW0173 F	2		15	M
1549700	COVID19	COVID19 (COVID19 (PFIZER-BIONTECH))	EW0172	1	IM	12	M	52
1549700	COVID19	COVID19 (COVID19 (PFIZER-BIONTECH))	EW0180	2	IM	12	M	52
1588546	COVID19	COVID19 (COVID19 (PFIZER-BIONTECH))	EW0178	2	IM	13	M	0
1666134	COVID19	COVID19 (COVID19 (PFIZER-BIONTECH))	EW0181	2	IM	17	M	27
1679262	HPV9	HPV (GARDASIL 9)	T038529	2	IM	12	M	13
1679319	COVID19	COVID19 (COVID19 (PFIZER-BIONTECH))	FD0809	2	IM	15	M	1
1713661	COVID19	COVID19 (COVID19 (PFIZER-BIONTECH))		UNK		12	F	13
1718005	COVID19	COVID19 (COVID19 (MODERNA))	004M20A	1	OT	75	F	6
1722262	COVID19	COVID19 (COVID19 (PFIZER-BIONTECH))		2		15	F	12
1738602	COVID19	COVID19 (COVID19 (PFIZER-BIONTECH))	FE3592	2	IM	12	M	5
1738602	COVID19	COVID19 (COVID19 (PFIZER-BIONTECH))	FD8448	1	IM	12	M	5
1749562	COVID19	COVID19 (COVID19 (PFIZER-BIONTECH))		2	IM	12	F	1
1774984	COVID19	COVID19 (COVID19 (PFIZER-BIONTECH))	FA7485	1	IM	16	M	12
1774987	COVID19	COVID19 (COVID19 (PFIZER-BIONTECH))	EW0198	1	IM	17	M	15
1779567	COVID19	COVID19 (COVID19 (PFIZER-BIONTECH))	EW0185	2	IM	13	M	91
1790138	COVID19	COVID19 (COVID19 (MODERNA))	019B21A	1	OT	33	F	159
1815184	FLU4	INFLUENZA (SEASONAL) (FLUZONE QUADRIVALENT)	UT7336JA	UNK	IM	10	M	1
1822149	COVID19	COVID19 (COVID19 (PFIZER-BIONTECH))	EW0198	2		16	F	9
1825034	COVID19	COVID19 (COVID19 (PFIZER-BIONTECH))	EL9266	1	IM	17	F	188
1825618	COVID19	COVID19 (COVID19 (PFIZER-BIONTECH))	FC3183	2	IM	12	F	13
1825618	COVID19	COVID19 (COVID19 (PFIZER-BIONTECH))	FC3183	1	IM	12	F	13
1836952	UNK	VACCINE NOT SPECIFIED (NO BRAND NAME)		UNK		15	F	19
1846326	COVID19	COVID19 (COVID19 (PFIZER-BIONTECH))	EW0169	2	IM	19	F	156
1850739	COVID19	COVID19 (COVID19 (PFIZER-BIONTECH))		2	SYR	16	M	0
1869452	COVID19	COVID19 (COVID19 (PFIZER-BIONTECH))	FK5127	1	IM	7	M	2
1885831	COVID19	COVID19 (COVID19 (PFIZER-BIONTECH))		2	IM	17	F	194
1913059	COVID19	COVID19 (COVID19 (PFIZER-BIONTECH))		UNK		12	M	22
1921138	COVID19	COVID19 (COVID19 (PFIZER-BIONTECH))		UNK		12	F	5
1951241	COVID19	COVID19 (COVID19 (PFIZER-BIONTECH))	FK5618	UNK	IM	10	M	1
1980996	COVID19	COVID19 (COVID19 (PFIZER-BIONTECH))		1	UN	9	M	3
1998900	COVID19	COVID19 (COVID19 (PFIZER-BIONTECH))	FK5127	1	SYR	5	M	33
1999197	COVID19	COVID19 (COVID19 (PFIZER-BIONTECH))	FL-0007	UNK	IM	9	M	26
2001194	COVID19	COVID19 (COVID19 (PFIZER-BIONTECH))	FK5618	1	IM	10	M	27
2001220	COVID19	COVID19 (COVID19 (PFIZER-BIONTECH))	Unknown	1	IM	5	F	54
2039924	COVID19	COVID19 (COVID19 (PFIZER-BIONTECH))	EP7533	2	IM	17	F	205
2058675	COVID19	COVID19 (COVID19 (PFIZER-BIONTECH))	FA7485	1	SYR	15	M	80
2068119	COVID19	COVID19 (COVID19 (PFIZER-BIONTECH))		UNK			M
2068126	COVID19	COVID19 (COVID19 (PFIZER-BIONTECH))		2			M
2075598	COVID19	COVID19 (COVID19 (PFIZER-BIONTECH))	FL3198	1	IM	14	M	10
2082532	COVID19	COVID19 (COVID19 (PFIZER-BIONTECH))	FK5127	1	IM	8	F	21
2085455	COVID19	COVID19 (COVID19 (PFIZER-BIONTECH))	FK5618	1	SYR	7	M	39
2085455	COVID19	COVID19 (COVID19 (PFIZER-BIONTECH))	FK5127	2	SYR	7	M	39
2086181	COVID19	COVID19 (COVID19 (PFIZER-BIONTECH))	FK5618	1	IM	9	M	13
2091650	COVID19	COVID19 (COVID19 (PFIZER-BIONTECH))		UNK		11	M	73
2095590	COVID19	COVID19 (COVID19 (PFIZER-BIONTECH))	FK5618	1	IM	8	M	3
2098837	COVID19	COVID19 (COVID19 (PFIZER-BIONTECH))	FL0007	1	SYR	9	M	22
2099710	COVID19	COVID19 (COVID19 (PFIZER-BIONTECH))		UNK		5	F	4
2101657	COVID19	COVID19 (COVID19 (PFIZER-BIONTECH))		2		14	F	8
2109625	COVID19	COVID19 (COVID19 (PFIZER-BIONTECH))	FL007	2	IM	8	M	8
2114249	COVID19	COVID19 (COVID19 (PFIZER-BIONTECH))	unknown	UNK		5	F	0
2116033	COVID19	COVID19 (COVID19 (PFIZER-BIONTECH))	EW0172	1	IM	13	M	96
2116033	COVID19	COVID19 (COVID19 (PFIZER-BIONTECH))	EW0183	2	IM	13	M	96
2116196	COVID19	COVID19 (COVID19 (PFIZER-BIONTECH))	EW0179	UNK		16	M	15
2117060	COVID19	COVID19 (COVID19 (PFIZER-BIONTECH))	FL3197	1	IM	13	F	52
2117060	COVID19	COVID19 (COVID19 (PFIZER-BIONTECH))	FL3197	2	IM	13	F	52
2119472	COVID19	COVID19 (COVID19 (PFIZER-BIONTECH))		2	IM	11	M	52
2129102	COVID19	COVID19 (COVID19 (PFIZER-BIONTECH))		1	IM	12	F	56
2129102	COVID19	COVID19 (COVID19 (PFIZER-BIONTECH))		2	IM	12	F	56
2129111	COVID19	COVID19 (COVID19 (PFIZER-BIONTECH))	FK5127	1	IM	5	M	19
2129143	COVID19	COVID19 (COVID19 (PFIZER-BIONTECH))	FK5127	1	IM	5	F	39
2129143	COVID19	COVID19 (COVID19 (PFIZER-BIONTECH))	FK5618	2	IM	5	F	39
2129162	COVID19	COVID19 (COVID19 (PFIZER-BIONTECH))	FL0007	1	IM	8	F	7
2129162	COVID19	COVID19 (COVID19 (PFIZER-BIONTECH))	FK5618	2	IM	8	F	7
2131476	COVID19	COVID19 (COVID19 (PFIZER-BIONTECH))		UNK		11	M	39
2137055	COVID19	COVID19 (COVID19 (PFIZER-BIONTECH))	FK5127	2	UN	11	M	83
2137170	COVID19	COVID19 (COVID19 (PFIZER-BIONTECH))	FE3592	1		17	M	20
2137170	COVID19	COVID19 (COVID19 (PFIZER-BIONTECH))		2		17	M	20
2137230	COVID19	COVID19 (COVID19 (PFIZER-BIONTECH))	FL0007	2	SYR	7	M	43
2147630	COVID19	COVID19 (COVID19 (PFIZER-BIONTECH))	FK5618	1	IM	10	F	47
2148497	COVID19	COVID19 (COVID19 (PFIZER-BIONTECH))	FK5127	1		9	M	16
2148497	COVID19	COVID19 (COVID19 (PFIZER-BIONTECH))	FL0007	2		9	M	16
2148509	COVID19	COVID19 (COVID19 (PFIZER-BIONTECH))	EN6202	1		15	M	56
2148509	COVID19	COVID19 (COVID19 (PFIZER-BIONTECH))	ER8703	2		15	M	56
2148610	COVID19	COVID19 (COVID19 (PFIZER-BIONTECH))		UNK		7	F	26
2151905	COVID19	COVID19 (COVID19 (PFIZER-BIONTECH))	FL0007	UNK	SYR	8	M	29
2151905	COVID19	COVID19 (COVID19 (PFIZER-BIONTECH))	FL0007	UNK	SYR	8	M	29
2155002	COVID19	COVID19 (COVID19 (PFIZER-BIONTECH))	FK5618	2	IM	7	F	57
2157671	COVID19	COVID19 (COVID19 (PFIZER-BIONTECH))	FK127	1	IM	11	F	37
2157671	COVID19	COVID19 (COVID19 (PFIZER-BIONTECH))	FK127	1	IM	11	F	37
2162703	COVID19	COVID19 (COVID19 (PFIZER-BIONTECH))	FK5127	1	IM	8	M	67
2162703	COVID19	COVID19 (COVID19 (PFIZER-BIONTECH))	FL0007	2	IM	8	M	67
2163117	COVID19	COVID19 (COVID19 (PFIZER-BIONTECH))	EW0171	2	IM	15	M	213
2163117	COVID19	COVID19 (COVID19 (PFIZER-BIONTECH))	EW0153	1	IM	15	M	213
2177804	COVID19	COVID19 (COVID19 (PFIZER-BIONTECH))		1	IM	9	F	4
2179979	COVID19	COVID19 (COVID19 (PFIZER-BIONTECH))		1		16	F	278
2179979	COVID19	COVID19 (COVID19 (PFIZER-BIONTECH))		2		16	F	278
2182242	UNK	VACCINE NOT SPECIFIED (NO BRAND NAME)		UNK		7	F
2182249	UNK	VACCINE NOT SPECIFIED (NO BRAND NAME)		UNK		10	M
2184157	COVID19	COVID19 (COVID19 (PFIZER-BIONTECH))	FL0007	1	IM	5	M	15
2189275	COVID19	COVID19 (COVID19 (PFIZER-BIONTECH))	FJ6369	2	IM	12	M	18
2192239	COVID19	COVID19 (COVID19 (PFIZER-BIONTECH))	FL8094	1	SYR	7	F	3
2194347	COVID19	COVID19 (COVID19 (PFIZER-BIONTECH))	FK618	1	UN	5	F	69
2194366	COVID19	COVID19 (COVID19 (PFIZER-BIONTECH))		2		6	F	69
2198838	COVID19	COVID19 (COVID19 (PFIZER-BIONTECH))		2	IM	7	F	0
2200590	COVID19	COVID19 (COVID19 (PFIZER-BIONTECH))	FK5618	1	IM	7	F	60
2206549	COVID19	COVID19 (COVID19 (PFIZER-BIONTECH))	EW0198	2	IM	14	F	123
2216431	COVID19	COVID19 (COVID19 (PFIZER-BIONTECH))	FE3594	2	IM	12	F	5
2220471	COVID19	COVID19 (COVID19 (PFIZER-BIONTECH))	FK5127	1	IM	9	F	0
2223341	COVID19	COVID19 (COVID19 (PFIZER-BIONTECH))	FL8095	2	IM	10	M	3
2231126	COVID19	COVID19 (COVID19 (PFIZER-BIONTECH))	FL0007	2	IM	6	F	29
2231128	COVID19	COVID19 (COVID19 (PFIZER-BIONTECH))	FL0007	2	IM	9	M	34
2231268	COVID19	COVID19 (COVID19 (PFIZER-BIONTECH))	FK5127	1	IM	10	F	0
2233852	COVID19	COVID19 (COVID19 (PFIZER-BIONTECH))	FL0007	UNK	SYR	11	M	0
2233852	FLUC4	INFLUENZA (SEASONAL) (FLUCELVAX QUADRIVALENT)	309622	UNK	SYR	11	M	0
2236031	COVID19	COVID19 (COVID19 (PFIZER-BIONTECH))		1	IM	7	F	32
2236031	COVID19	COVID19 (COVID19 (PFIZER-BIONTECH))		2	IM	7	F	32
2241082	COVID19	COVID19 (COVID19 (UNKNOWN))		UNK	UN	7	M	51
2242995	COVID19	COVID19 (COVID19 (PFIZER-BIONTECH))		UNK			U
2243002	COVID19	COVID19 (COVID19 (PFIZER-BIONTECH))		2			F
2243014	COVID19	COVID19 (COVID19 (PFIZER-BIONTECH))		2			M
2247685	COVID19	COVID19 (COVID19 (PFIZER-BIONTECH))		UNK			U
2252035	COVID19	COVID19 (COVID19 (PFIZER-BIONTECH))	FL8094	2	IM	5	F	6
2256715	COVID19	COVID19 (COVID19 (PFIZER-BIONTECH))	FK5127	1		10	M	78
2256715	COVID19	COVID19 (COVID19 (PFIZER-BIONTECH))	FL0007	2		10	M	78
2256724	COVID19	COVID19 (COVID19 (PFIZER-BIONTECH))	EW0196	2	IM	15	M	196
2256770	COVID19	COVID19 (COVID19 (PFIZER-BIONTECH))	FJ8757	1	IM	13	F	44
2256788	COVID19	COVID19 (COVID19 (PFIZER-BIONTECH))	FK5127	1		10	M	69
2256788	COVID19	COVID19 (COVID19 (PFIZER-BIONTECH))	FK5618	2		10	M	69
2256919	COVID19	COVID19 (COVID19 (PFIZER-BIONTECH))	FK5618	1	IM	7	M	6
2258406	COVID19	COVID19 (COVID19 (PFIZER-BIONTECH))	FK5127	1	IM	9	F	21
2258406	COVID19	COVID19 (COVID19 (PFIZER-BIONTECH))	FL0007	2	IM	9	F	21
2260167	COVID19	COVID19 (COVID19 (PFIZER-BIONTECH))	FL0007	2	IM	7	F	89
2261939	COVID19	COVID19 (COVID19 (PFIZER-BIONTECH))	FL0007	1	IM	10	M	43
2261945	COVID19	COVID19 (COVID19 (PFIZER-BIONTECH))	FK5127	1	IM	8	M	26
2261945	COVID19	COVID19 (COVID19 (PFIZER-BIONTECH))	FK5127	2	IM	8	M	26
2261951	COVID19	COVID19 (COVID19 (PFIZER-BIONTECH))	FK5127	1	IM	9	M	74
2261951	COVID19	COVID19 (COVID19 (PFIZER-BIONTECH))	FK5618	2	IM	9	M	74
2261958	COVID19	COVID19 (COVID19 (PFIZER-BIONTECH))	FK5127	1	IM	10	M	2
2261958	COVID19	COVID19 (COVID19 (PFIZER-BIONTECH))	FK5618	2	IM	10	M	2
2263757	COVID19	COVID19 (COVID19 (PFIZER-BIONTECH))	FK5618 (317)	1	IM	11	F	94
2268832	COVID19	COVID19 (COVID19 (PFIZER-BIONTECH))	FF2593	2	IM	16	M	134
2271220	COVID19	COVID19 (COVID19 (PFIZER-BIONTECH))		1	UN	10	M	54
2271220	COVID19	COVID19 (COVID19 (PFIZER-BIONTECH))		2	UN	10	M	54
2271222	COVID19	COVID19 (COVID19 (PFIZER-BIONTECH))		1	IM	7	F	2
2271222	COVID19	COVID19 (COVID19 (PFIZER-BIONTECH))		2	IM	7	F	2
2271227	COVID19	COVID19 (COVID19 (PFIZER-BIONTECH))	FK5127	2	IM	8	F	40
2271233	COVID19	COVID19 (COVID19 (PFIZER-BIONTECH))	FL0007	1	IM	10	M	39
2275628	COVID19	COVID19 (COVID19 (PFIZER-BIONTECH))	FL0007	2	IM	6	F	33
2275643	COVID19	COVID19 (COVID19 (PFIZER-BIONTECH))	FK5127	1	IM	7	M	31
2275807	COVID19	COVID19 (COVID19 (PFIZER-BIONTECH))	FK5618	1	IM	10	M	0
2275807	COVID19	COVID19 (COVID19 (PFIZER-BIONTECH))	FK5618	2	IM	10	M	0
2275834	COVID19	COVID19 (COVID19 (PFIZER-BIONTECH))	FK5618	1	IM	11	M	31
2275834	COVID19	COVID19 (COVID19 (PFIZER-BIONTECH))	FK5618	2	IM	11	M	31
2307085	COVID19	COVID19 (COVID19 (PFIZER-BIONTECH))		1	SYR	9	M	20
2322121	COVID19	COVID19 (COVID19 (PFIZER-BIONTECH))	FK5127	1		6	M	78
2327226	COVID19	COVID19 (COVID19 (PFIZER-BIONTECH))	RL0007	1	SYR	8	F	92
2327226	COVID19	COVID19 (COVID19 (PFIZER-BIONTECH))	FL0007	2	SYR	8	F	92
2331952	COVID19	COVID19 (COVID19 (PFIZER-BIONTECH))	EW0187	2	IM	13	M	269
2366193	COVID19	COVID19 (COVID19 (PFIZER-BIONTECH))	FL0007	1	IM	5	M	21
2366193	COVID19	COVID19 (COVID19 (PFIZER-BIONTECH))	FL0007	2	IM	5	M	21
2366215	COVID19	COVID19 (COVID19 (PFIZER-BIONTECH))	EW0168	1	IM	15	F	379
2366215	COVID19	COVID19 (COVID19 (PFIZER-BIONTECH))	EW0180	2	IM	15	F	379
2366215	COVID19	COVID19 (COVID19 (PFIZER-BIONTECH))	FJ8762	3	IM	15	F	379
2395868	COVID19	COVID19 (COVID19 (PFIZER-BIONTECH))		UNK		1.08	M
2427478	COVID19	COVID19 (COVID19 (PFIZER-BIONTECH))	FT9142	2		4	F	8
2429286	COVID19	COVID19 (COVID19 (PFIZER-BIONTECH))	FJ5682 - CMC	3	IM	14	M	197
2459965	COVID19	COVID19 (COVID19 (PFIZER-BIONTECH))	FL8095	1	IM	11	M	25
2471818	COVID19	COVID19 (COVID19 (PFIZER-BIONTECH))	EW0179	1	IM	13	M	155
2471818	COVID19	COVID19 (COVID19 (PFIZER-BIONTECH))	EW0185	2	IM	13	M	155
2494054	COVID19	COVID19 (COVID19 (PFIZER-BIONTECH))	FK5618	2	IM	9	M	308
2494054	COVID19	COVID19 (COVID19 (PFIZER-BIONTECH))	FK5127	1	IM	9	M	308
2500017	COVID19-2	COVID19 (COVID19 (MODERNA BIVALENT))	010H22A	3	IM	14	M	0
2522029	COVID19	COVID19 (COVID19 (PFIZER-BIONTECH))		1		12	M	420
2564608	COVID19	COVID19 (COVID19 (PFIZER-BIONTECH))		UNK		17	F	22
2564608	COVID19	COVID19 (COVID19 (PFIZER-BIONTECH))		UNK		17	F	22
2564608	COVID19	COVID19 (COVID19 (PFIZER-BIONTECH))		UNK		17	F	22
2564608	COVID19-2	COVID19 (COVID19 (PFIZER-BIONTECH BIVALENT))	GJ2524	4	UN	17	F	22
2581177	COVID19	COVID19 (COVID19 (PFIZER-BIONTECH))		1			M
2596062	COVID19	COVID19 (COVID19 (MODERNA))		1	IM	1.67	M	103
2604100	COVID19	COVID19 (COVID19 (PFIZER-BIONTECH))	FY3680	1		3	M	36
2623553	HEPA	HEP A (HAVRIX)	9R5LC	UNK	IM	10	M	17
2623553	TDAP	TDAP (ADACEL)	U7624AA	UNK	IM	10	M	17
2654415	COVID19-2	COVID19 (COVID19 (PFIZER-BIONTECH BIVALENT))	GK1657	4	IM	6	F	10
2660124	COVID19	COVID19 (COVID19 (PFIZER-BIONTECH))		3	OT	63	U	0
2678813	COVID19	COVID19 (COVID19 (PFIZER-BIONTECH))		3			M
999527	DTIPV	DT + IPV (NO BRAND NAME)	R3J396V	UNK	IM	14	M	0
999527	MNQ	MENINGOCOCCAL CONJUGATE (NO BRAND NAME)	CM5464 ?	UNK	IM	14	M	0
1067789	COVID19	COVID19 (COVID19 (PFIZER-BIONTECH))		1			M
1517581	COVID19	COVID19 (COVID19 (PFIZER-BIONTECH))	FC3098	1			M	4
1629263	COVID19	COVID19 (COVID19 (PFIZER-BIONTECH))	FD0932	2	OT		M	6
1664633	COVID19	COVID19 (COVID19 (PFIZER-BIONTECH))		1	OT		F	31
1686162	COVID19	COVID19 (COVID19 (PFIZER-BIONTECH))		UNK	OT	16	F	29
1686815	COVID19	COVID19 (COVID19 (PFIZER-BIONTECH))	Unknown	1	OT		M	5
1702866	COVID19	COVID19 (COVID19 (PFIZER-BIONTECH))	FA4728	1	OT		F	7
1716208	COVID19	COVID19 (COVID19 (PFIZER-BIONTECH))	FC3095	1		17	F	26
1746310	COVID19	COVID19 (COVID19 (PFIZER-BIONTECH))		1	OT		M	16
1769213	COVID19	COVID19 (COVID19 (PFIZER-BIONTECH))	FG9428	1	OT		F
1786499	COVID19	COVID19 (COVID19 (PFIZER-BIONTECH))		1			M
1789105	COVID19	COVID19 (COVID19 (PFIZER-BIONTECH))	FE7051	1	OT	16	M	6
1799303	COVID19	COVID19 (COVID19 (PFIZER-BIONTECH))		2	OT	17	M	0
1802267	COVID19	COVID19 (COVID19 (PFIZER-BIONTECH))	FE6029	2	OT		M	1
1822266	COVID19	COVID19 (COVID19 (PFIZER-BIONTECH))		2	OT		M	78
1829949	COVID19	COVID19 (COVID19 (MODERNA))		1	OT	12	F	48
1830306	COVID19	COVID19 (COVID19 (JANSSEN))		UNK			M
1841097	COVID19	COVID19 (COVID19 (PFIZER-BIONTECH))		1			F
1844651	COVID19	COVID19 (COVID19 (PFIZER-BIONTECH))	Fng5782	1			F	8
1849916	COVID19	COVID19 (COVID19 (MODERNA))		1	OT	13	M	39
1855464	COVID19	COVID19 (COVID19 (PFIZER-BIONTECH))	1H048A	UNK		16	F
1862195	COVID19	COVID19 (COVID19 (PFIZER-BIONTECH))		2			M	18
1874779	COVID19	COVID19 (COVID19 (PFIZER-BIONTECH))		2	OT		M	2
1883231	COVID19	COVID19 (COVID19 (PFIZER-BIONTECH))	Unknown	1	OT	12	M	4
1907556	COVID19	COVID19 (COVID19 (MODERNA))	3005701	1	OT	15	M	1
1910579	COVID19	COVID19 (COVID19 (PFIZER-BIONTECH))		1			F
1913907	COVID19	COVID19 (COVID19 (PFIZER-BIONTECH))		UNK			M
1921614	COVID19	COVID19 (COVID19 (PFIZER-BIONTECH))		2			U
1926315	COVID19	COVID19 (COVID19 (PFIZER-BIONTECH))		2	OT		M	27
1927336	COVID19	COVID19 (COVID19 (PFIZER-BIONTECH))		1			F	18
1932048	COVID19	COVID19 (COVID19 (PFIZER-BIONTECH))		UNK			F
1934462	COVID19	COVID19 (COVID19 (PFIZER-BIONTECH))		UNK	OT		F	12
1940346	COVID19	COVID19 (COVID19 (PFIZER-BIONTECH))		2	OT	17	F
1950104	COVID19	COVID19 (COVID19 (PFIZER-BIONTECH))	FK0108	1			M
1959913	COVID19	COVID19 (COVID19 (PFIZER-BIONTECH))	FG6273	2			M	56
1969561	COVID19	COVID19 (COVID19 (PFIZER-BIONTECH))		1			M	28
1994311	COVID19	COVID19 (COVID19 (PFIZER-BIONTECH))	FK0115	1	OT		M	16
2040948	COVID19	COVID19 (COVID19 (PFIZER-BIONTECH))	Unknown	2	OT		M	0
2041823	COVID19	COVID19 (COVID19 (PFIZER-BIONTECH))	FC5436	1	OT	13	M	21
2049751	COVID19	COVID19 (COVID19 (MODERNA))		UNK			M
2049751	COVID19	COVID19 (COVID19 (PFIZER-BIONTECH))		UNK			M
2051792	COVID19	COVID19 (COVID19 (PFIZER-BIONTECH))	30025TB	2	OT	3	F	0
2078080	COVID19	COVID19 (COVID19 (PFIZER-BIONTECH))	FN4072	UNK	OT		M	0
2080608	COVID19	COVID19 (COVID19 (PFIZER-BIONTECH))	Unknown	2	OT		M	48
2083421	COVID19	COVID19 (COVID19 (PFIZER-BIONTECH))	Unknown	2	OT		F
2088380	COVID19	COVID19 (COVID19 (PFIZER-BIONTECH))	SCUE1	UNK	OT	15	F	15
2089484	COVID19	COVID19 (COVID19 (PFIZER-BIONTECH))	FN4071	2	OT		F	1
2093703	COVID19	COVID19 (COVID19 (PFIZER-BIONTECH))		1	OT	17	M	1
2095090	COVID19	COVID19 (COVID19 (PFIZER-BIONTECH))	FG6273	2			F	97
2118176	COVID19	COVID19 (COVID19 (PFIZER-BIONTECH))	FG6273	1			F	7
2122330	COVID19	COVID19 (COVID19 (PFIZER-BIONTECH))	FG7372	1	OT		F	5
2132336	COVID19	COVID19 (COVID19 (PFIZER-BIONTECH))	FN4072	2	OT	10	M
2136033	COVID19	COVID19 (COVID19 (PFIZER-BIONTECH))	1H049A	UNK		12	F	23
2158497	COVID19	COVID19 (COVID19 (PFIZER-BIONTECH))		1			F
2162986	COVID19	COVID19 (COVID19 (PFIZER-BIONTECH))	FN4071	1			F	1
2182831	COVID19	COVID19 (COVID19 (PFIZER-BIONTECH))		2			F	80
2182837	COVID19	COVID19 (COVID19 (PFIZER-BIONTECH))		1			F	38
2182995	COVID19	COVID19 (COVID19 (PFIZER-BIONTECH))	FN4072	3		7	M	0
2192725	COVID19	COVID19 (COVID19 (PFIZER-BIONTECH))		1			F	13
2212514	COVID19	COVID19 (COVID19 (PFIZER-BIONTECH))		UNK			F	43
2214744	COVID19	COVID19 (COVID19 (PFIZER-BIONTECH))	FA9099	2	OT		M	31
2215498	COVID19	COVID19 (COVID19 (PFIZER-BIONTECH))	FN4072	2	OT	5	F	1
2226760	COVID19	COVID19 (COVID19 (PFIZER-BIONTECH))		1			M
2235642	COVID19	COVID19 (COVID19 (PFIZER-BIONTECH))	FN4072	1	OT	7	M	18
2253527	COVID19	COVID19 (COVID19 (PFIZER-BIONTECH))		2			M	0
2255544	CEE	FSME-IMMUN. (NO BRAND NAME)		UNK			M	15
2265119	COVID19	COVID19 (COVID19 (PFIZER-BIONTECH))	FN4072	UNK	OT	9	F	21
2286007	COVID19	COVID19 (COVID19 (MODERNA))		1	OT	12	F
2286008	COVID19	COVID19 (COVID19 (MODERNA))		1	OT	13	M
2308879	COVID19	COVID19 (COVID19 (PFIZER-BIONTECH))	ACB4692	2	OT	13	M	58
2331298	COVID19	COVID19 (COVID19 (PFIZER-BIONTECH))		UNK			U
2386022	DTAPIPVHIB	DTAP + IPV + HIB (UNKNOWN)		UNK		1.08	M
2386022	MMRV	MEASLES + MUMPS + RUBELLA + VARICELLA (PROQUAD)	T018070	UNK		1.08	M
2386022	PNC13	PNEUMO (PREVNAR13)		UNK		1.08	M
2386134	COVID19	COVID19 (COVID19 (PFIZER-BIONTECH))	FN9605	3		14	M	34
2392650	COVID19	COVID19 (COVID19 (PFIZER-BIONTECH))		2			F
2405163	COVID19	COVID19 (COVID19 (PFIZER-BIONTECH))		UNK	OT		F
2424692	COVID19	COVID19 (COVID19 (PFIZER-BIONTECH))	SCVY8	2		12	M	80
2439253	COVID19	COVID19 (COVID19 (PFIZER-BIONTECH))		1	OT		F	8
2462886	DTAPIPV	DTAP + IPV (INFANRIX TETRA)	UNK	UNK			M	32
2463850	COVID19	COVID19 (COVID19 (PFIZER-BIONTECH))		2			M
2463851	COVID19	COVID19 (COVID19 (PFIZER-BIONTECH))		1			F
2483248	COVID19	COVID19 (COVID19 (PFIZER-BIONTECH))	1D020A	2		17	M	119
2487787	COVID19	COVID19 (COVID19 (PFIZER-BIONTECH))		2	OT	8	F	0
2498426	COVID19	COVID19 (COVID19 (PFIZER-BIONTECH))		2			F
2498577	FLU4	INFLUENZA (SEASONAL) (FLUARIX QUADRIVALENT)	UNK	1		1.75	M	0
2516062	COVID19	COVID19 (COVID19 (PFIZER-BIONTECH))		UNK			M
2517770	COVID19	COVID19 (COVID19 (PFIZER-BIONTECH))		2			U
2552343	COVID19	COVID19 (COVID19 (PFIZER-BIONTECH))		2			M
2562420	COVID19	COVID19 (COVID19 (PFIZER-BIONTECH))		1			U
2562421	COVID19	COVID19 (COVID19 (PFIZER-BIONTECH))		1			U
2626820	COVID19	COVID19 (COVID19 (PFIZER-BIONTECH))		2			M
2626820	COVID19	COVID19 (COVID19 (UNKNOWN))		1			M
2628836	COVID19-2	COVID19 (COVID19 (MODERNA BIVALENT))	048D22A	4	OT	61	M	0
2643022	COVID19	COVID19 (COVID19 (UNKNOWN))		1			M
2646012	COVID19	COVID19 (COVID19 (PFIZER-BIONTECH))		2			F
2688387	FLU4	INFLUENZA (SEASONAL) (AFLURIA QUADRIVALENT)	No batch number	UNK	OT	10	M

## Sheet: MIS-A
['Multisystem inflammatory syndrome in adults']
Vaccine code report
Vaccine name	Symptoms	Administered	Frequency
COVID19	47	1634153	2
COVID19-2	1	39293	2
UNK	1	33974	2
Vaccine name report
Vaccine name	Symptoms	Administered	Frequency
COVID19 (COVID19 (MODERNA))	15	555712	2
COVID19 (COVID19 (PFIZER-BIONTECH))	28	965666	2
COVID19 (COVID19 (JANSSEN))	3	98568	3
COVID19 (COVID19 (MODERNA BIVALENT))	1	16480	6
VACCINE NOT SPECIFIED (NO BRAND NAME)	1	31019	3
COVID19 (COVID19 (UNKNOWN))	1	13824	7
Age report:
Age	COVID19	COVID19-2	UNK
-1	23	0	0
0	0	0	0
1	0	0	0
2	0	0	0
3	0	0	0
4	0	0	0
5	0	0	0
6	0	0	0
7	0	0	0
8	0	0	0
9	0	0	0
10	0	0	0
11	0	0	0
12	0	0	0
13	0	0	0
14	0	0	0
15	0	0	0
16	0	0	0
17	0	0	0
18	0	0	0
19	0	0	0
20	1	0	0
21	1	0	0
22	1	0	0
23	1	0	0
24	1	0	0
25	1	0	0
26	0	0	0
27	1	0	0
28	0	0	0
29	1	0	0
30	0	0	0
31	0	0	1
32	0	0	0
33	1	0	0
34	0	0	0
35	0	0	0
36	0	0	0
37	1	0	0
38	0	0	0
39	1	0	0
40	0	0	0
41	1	0	0
42	0	0	0
43	0	0	0
44	0	0	0
45	0	0	0
46	0	0	0
47	0	0	0
48	0	0	0
49	1	1	0
50	0	0	0
51	2	0	0
52	1	0	0
53	0	0	0
54	0	0	0
55	1	0	0
56	0	0	0
57	1	0	0
58	0	0	0
59	1	0	0
60	1	0	0
61	0	0	0
62	0	0	0
63	1	0	0
64	0	0	0
65	0	0	0
66	0	0	0
67	0	0	0
68	1	0	0
69	0	0	0
70	0	0	0
71	0	0	0
72	0	0	0
73	1	0	0
74	0	0	0
75	0	0	0
76	0	0	0
77	0	0	0
78	0	0	0
79	0	0	0
80	0	0	0
81	0	0	0
82	0	0	0
83	0	0	0
84	0	0	0
85	0	0	0
86	0	0	0
87	0	0	0
88	0	0	0
89	0	0	0
90	0	0	0
91	0	0	0
92	0	0	0
93	0	0	0
94	0	0	0
95	0	0	0
96	0	0	0
97	0	0	0
98	0	0	0
99	0	0	0
100	0	0	0
101	0	0	0
102	0	0	0
103	0	0	0
104	0	0	0
105	0	0	0
106	0	0	0
107	0	0	0
108	0	0	0
109	0	0	0
110	0	0	0
111	0	0	0
112	0	0	0
113	0	0	0
114	0	0	0
115	0	0	0
116	0	0	0
117	0	0	0
118	0	0	0
119	0	0	0
120	0	0	0
Age report: count|total|freq/100K
Age	COVID19	COVID19-2	UNK
-1	23|477193|4	0|0|0	0|0|0
0	0|0|0	0|0|0	0|0|0
1	0|0|0	0|0|0	0|0|0
2	0|0|0	0|0|0	0|0|0
3	0|0|0	0|0|0	0|0|0
4	0|0|0	0|0|0	0|0|0
5	0|0|0	0|0|0	0|0|0
6	0|0|0	0|0|0	0|0|0
7	0|0|0	0|0|0	0|0|0
8	0|0|0	0|0|0	0|0|0
9	0|0|0	0|0|0	0|0|0
10	0|0|0	0|0|0	0|0|0
11	0|0|0	0|0|0	0|0|0
12	0|0|0	0|0|0	0|0|0
13	0|0|0	0|0|0	0|0|0
14	0|0|0	0|0|0	0|0|0
15	0|0|0	0|0|0	0|0|0
16	0|0|0	0|0|0	0|0|0
17	0|0|0	0|0|0	0|0|0
18	0|0|0	0|0|0	0|0|0
19	0|0|0	0|0|0	0|0|0
20	1|8321|12	0|0|0	0|0|0
21	1|8716|11	0|0|0	0|0|0
22	1|9445|10	0|0|0	0|0|0
23	1|10291|9	0|0|0	0|0|0
24	1|10985|9	0|0|0	0|0|0
25	1|11912|8	0|0|0	0|0|0
26	0|0|0	0|0|0	0|0|0
27	1|13197|7	0|0|0	0|0|0
28	0|0|0	0|0|0	0|0|0
29	1|14700|6	0|0|0	0|0|0
30	0|0|0	0|0|0	0|0|0
31	0|0|0	0|0|0	1|225|444
32	0|0|0	0|0|0	0|0|0
33	1|17100|5	0|0|0	0|0|0
34	0|0|0	0|0|0	0|0|0
35	0|0|0	0|0|0	0|0|0
36	0|0|0	0|0|0	0|0|0
37	1|18062|5	0|0|0	0|0|0
38	0|0|0	0|0|0	0|0|0
39	1|18319|5	0|0|0	0|0|0
40	0|0|0	0|0|0	0|0|0
41	1|17858|5	0|0|0	0|0|0
42	0|0|0	0|0|0	0|0|0
43	0|0|0	0|0|0	0|0|0
44	0|0|0	0|0|0	0|0|0
45	0|0|0	0|0|0	0|0|0
46	0|0|0	0|0|0	0|0|0
47	0|0|0	0|0|0	0|0|0
48	0|0|0	0|0|0	0|0|0
49	1|18171|5	1|347|288	0|0|0
50	0|0|0	0|0|0	0|0|0
51	2|19046|10	0|0|0	0|0|0
52	1|18246|5	0|0|0	0|0|0
53	0|0|0	0|0|0	0|0|0
54	0|0|0	0|0|0	0|0|0
55	1|18015|5	0|0|0	0|0|0
56	0|0|0	0|0|0	0|0|0
57	1|18642|5	0|0|0	0|0|0
58	0|0|0	0|0|0	0|0|0
59	1|18563|5	0|0|0	0|0|0
60	1|18607|5	0|0|0	0|0|0
61	0|0|0	0|0|0	0|0|0
62	0|0|0	0|0|0	0|0|0
63	1|17448|5	0|0|0	0|0|0
64	0|0|0	0|0|0	0|0|0
65	0|0|0	0|0|0	0|0|0
66	0|0|0	0|0|0	0|0|0
67	0|0|0	0|0|0	0|0|0
68	1|16559|6	0|0|0	0|0|0
69	0|0|0	0|0|0	0|0|0
70	0|0|0	0|0|0	0|0|0
71	0|0|0	0|0|0	0|0|0
72	0|0|0	0|0|0	0|0|0
73	1|14364|6	0|0|0	0|0|0
74	0|0|0	0|0|0	0|0|0
75	0|0|0	0|0|0	0|0|0
76	0|0|0	0|0|0	0|0|0
77	0|0|0	0|0|0	0|0|0
78	0|0|0	0|0|0	0|0|0
79	0|0|0	0|0|0	0|0|0
80	0|0|0	0|0|0	0|0|0
81	0|0|0	0|0|0	0|0|0
82	0|0|0	0|0|0	0|0|0
83	0|0|0	0|0|0	0|0|0
84	0|0|0	0|0|0	0|0|0
85	0|0|0	0|0|0	0|0|0
86	0|0|0	0|0|0	0|0|0
87	0|0|0	0|0|0	0|0|0
88	0|0|0	0|0|0	0|0|0
89	0|0|0	0|0|0	0|0|0
90	0|0|0	0|0|0	0|0|0
91	0|0|0	0|0|0	0|0|0
92	0|0|0	0|0|0	0|0|0
93	0|0|0	0|0|0	0|0|0
94	0|0|0	0|0|0	0|0|0
95	0|0|0	0|0|0	0|0|0
96	0|0|0	0|0|0	0|0|0
97	0|0|0	0|0|0	0|0|0
98	0|0|0	0|0|0	0|0|0
99	0|0|0	0|0|0	0|0|0
100	0|0|0	0|0|0	0|0|0
101	0|0|0	0|0|0	0|0|0
102	0|0|0	0|0|0	0|0|0
103	0|0|0	0|0|0	0|0|0
104	0|0|0	0|0|0	0|0|0
105	0|0|0	0|0|0	0|0|0
106	0|0|0	0|0|0	0|0|0
107	0|0|0	0|0|0	0|0|0
108	0|0|0	0|0|0	0|0|0
109	0|0|0	0|0|0	0|0|0
110	0|0|0	0|0|0	0|0|0
111	0|0|0	0|0|0	0|0|0
112	0|0|0	0|0|0	0|0|0
113	0|0|0	0|0|0	0|0|0
114	0|0|0	0|0|0	0|0|0
115	0|0|0	0|0|0	0|0|0
116	0|0|0	0|0|0	0|0|0
117	0|0|0	0|0|0	0|0|0
118	0|0|0	0|0|0	0|0|0
119	0|0|0	0|0|0	0|0|0
120	0|0|0	0|0|0	0|0|0
Onset report:
Onset	COVID19	COVID19-2	UNK
-1	22		1
0	4	1
1	2
2	2
3	2
4	1
5
6
7	1
8
9	1
10	1
11
12
13	1
14
15
16	1
17
18
19
20	1
21
22
23	1
24
25
26
27	1
28	1
29
30
31
32
33
34
35
36
37
38
39
40
41
42
43
44
45
46
47
48	1
49
50
51
52
53
54
55
56
57
58
59
60
61
62
63
64
65
66
67
68
69
70
71
72
73
74
75
76
77
78
79
80
81	1
82
83
84
85
86
87
88
89
90
91
92
93
94
95
96
97
98
99
100
101
102
103
104
105
106
107
108
109
110	1
111
112
113
114
115
116
117
118
119
120
Shots report:
Shots	COVID19	COVID19-2	UNK
1	45	1	1
2	1
3
4
5
6
7
8
9
10
11
12
13
14
15
16
17
18
19
20
21
22
23
24
25
Shots frequency report: count|total|frequency/100K
Shots	COVID19	COVID19-2	UNK
1	45|1496895|3	1|34155|2	1|17959|5
2	1|59519|1	|0|0	|0|0
3	|0|0	|0|0	|0|0
4	|0|0	|0|0	|0|0
5	|0|0	|0|0	|0|0
6	|0|0	|0|0	|0|0
7	|0|0	|0|0	|0|0
8	|0|0	|0|0	|0|0
9	|0|0	|0|0	|0|0
10	|0|0	|0|0	|0|0
11	|0|0	|0|0	|0|0
12	|0|0	|0|0	|0|0
13	|0|0	|0|0	|0|0
14	|0|0	|0|0	|0|0
15	|0|0	|0|0	|0|0
16	|0|0	|0|0	|0|0
17	|0|0	|0|0	|0|0
18	|0|0	|0|0	|0|0
19	|0|0	|0|0	|0|0
20	|0|0	|0|0	|0|0
21	|0|0	|0|0	|0|0
22	|0|0	|0|0	|0|0
23	|0|0	|0|0	|0|0
24	|0|0	|0|0	|0|0
25	|0|0	|0|0	|0|0
Details report:
VAERS ID	Vaccine Code	Vaccine Name	Vax lot	Vax series	Vax route	Age	Gender	Onset
1700623	COVID19	COVID19 (COVID19 (MODERNA))		1		21	F	0
1735422	COVID19	COVID19 (COVID19 (PFIZER-BIONTECH))		1	IM	27	F	13
1742376	COVID19	COVID19 (COVID19 (PFIZER-BIONTECH))	FA90093	1	IM	25	M	2
1768747	COVID19	COVID19 (COVID19 (MODERNA))		2	IM	52	M	27
1813668	COVID19	COVID19 (COVID19 (MODERNA))	053e21a	1	IM	41	F	10
1857023	COVID19	COVID19 (COVID19 (MODERNA))	038K20A	1	OT	49	F	28
1896397	COVID19	COVID19 (COVID19 (PFIZER-BIONTECH))		2			M
1936309	COVID19	COVID19 (COVID19 (MODERNA))	014F21A	1	SYR	39	M	20
2091023	COVID19	COVID19 (COVID19 (PFIZER-BIONTECH))		2			U
2091025	COVID19	COVID19 (COVID19 (PFIZER-BIONTECH))		2			U
2167673	COVID19	COVID19 (COVID19 (MODERNA))		UNK	OT	73	M
2215569	COVID19	COVID19 (COVID19 (MODERNA))		UNK	OT	63	F
2228641	COVID19	COVID19 (COVID19 (JANSSEN))	205A21A	1	SYR	68	F	81
2242999	COVID19	COVID19 (COVID19 (PFIZER-BIONTECH))		UNK			U
2259002	COVID19	COVID19 (COVID19 (PFIZER-BIONTECH))	ER8736	2	IM	29	F	1
2439549	COVID19	COVID19 (COVID19 (JANSSEN))		1			M
2451919	COVID19	COVID19 (COVID19 (PFIZER-BIONTECH))		2			F
2470452	COVID19	COVID19 (COVID19 (MODERNA))	040A21A	1	OT	57	F	110
2472773	COVID19-2	COVID19 (COVID19 (MODERNA BIVALENT))	gh9693	3	IM	49	M	0
2482420	COVID19	COVID19 (COVID19 (MODERNA))		1	OT	23	M
2517093	COVID19	COVID19 (COVID19 (MODERNA))		2	OT	20	M
2681016	UNK	VACCINE NOT SPECIFIED (NO BRAND NAME)		1		31	M
1872470	COVID19	COVID19 (COVID19 (MODERNA))		1	OT	22	M	3
1925983	COVID19	COVID19 (COVID19 (PFIZER-BIONTECH))	SCRP9	1	OT	24	F	16
1937961	COVID19	COVID19 (COVID19 (PFIZER-BIONTECH))		2			F	0
1961000	COVID19	COVID19 (COVID19 (MODERNA))		2	OT	37	F
1994199	COVID19	COVID19 (COVID19 (PFIZER-BIONTECH))		1			M
2013396	COVID19	COVID19 (COVID19 (PFIZER-BIONTECH))	EN1195	2			F	1
2105863	COVID19	COVID19 (COVID19 (PFIZER-BIONTECH))	Unknown	2			F	9
2164820	COVID19	COVID19 (COVID19 (MODERNA))		3	OT	51	M	2
2203039	COVID19	COVID19 (COVID19 (PFIZER-BIONTECH))	FK8562	3			F	4
2226752	COVID19	COVID19 (COVID19 (PFIZER-BIONTECH))		1			F
2230814	COVID19	COVID19 (COVID19 (PFIZER-BIONTECH))		1			U
2245067	COVID19	COVID19 (COVID19 (PFIZER-BIONTECH))	FC1433	2	OT		F	48
2245162	COVID19	COVID19 (COVID19 (PFIZER-BIONTECH))		3	OT		F	0
2319433	COVID19	COVID19 (COVID19 (PFIZER-BIONTECH))	Unknown	3	OT		F	3
2386053	COVID19	COVID19 (COVID19 (PFIZER-BIONTECH))	FA5831	2	OT	60	M	146
2392541	COVID19	COVID19 (COVID19 (PFIZER-BIONTECH))		2			F
2427862	COVID19	COVID19 (COVID19 (PFIZER-BIONTECH))	EM0477	2		59	F	7
2429122	COVID19	COVID19 (COVID19 (JANSSEN))		1			U
2455371	COVID19	COVID19 (COVID19 (PFIZER-BIONTECH))		1	OT		F
2472347	COVID19	COVID19 (COVID19 (PFIZER-BIONTECH))		1			F
2476421	COVID19	COVID19 (COVID19 (MODERNA))		UNK	OT	51	F
2480796	COVID19	COVID19 (COVID19 (PFIZER-BIONTECH))		2			M
2546783	COVID19	COVID19 (COVID19 (PFIZER-BIONTECH))	GH9436	UNK			F	0
2546783	COVID19	COVID19 (COVID19 (UNKNOWN))		UNK			F	0
2568450	COVID19	COVID19 (COVID19 (PFIZER-BIONTECH))	SCVY8	UNK		33	M
2585220	COVID19	COVID19 (COVID19 (MODERNA))		UNK	OT	55	F
2612640	COVID19	COVID19 (COVID19 (PFIZER-BIONTECH))		3			F	23

## Sheet: MIS
['Multisystem inflammatory syndrome']
Vaccine code report
Vaccine name	Symptoms	Administered	Frequency
COVID19	131	1634153	8
UNK	7	33974	20
DTAP	1	64108	1
TDAP	1	45855	2
MMR	1	89659	1
FLUX	1	34142	2
Vaccine name report
Vaccine name	Symptoms	Administered	Frequency
COVID19 (COVID19 (PFIZER-BIONTECH))	98	965666	10
VACCINE NOT SPECIFIED (NO BRAND NAME)	7	31019	22
COVID19 (COVID19 (JANSSEN))	2	98568	2
COVID19 (COVID19 (MODERNA))	27	555712	4
DTAP (DAPTACEL)	1	16336	6
TDAP (BOOSTRIX)	1	17987	5
COVID19 (COVID19 (UNKNOWN))	4	13824	28
MEASLES + MUMPS + RUBELLA (MMR II)	1	78310	1
INFLUENZA (SEASONAL) (NO BRAND NAME)	1	32989	3
Age report:
Age	COVID19	UNK	DTAP	TDAP	MMR	FLUX
-1	66	3	0	0	1	1
0	0	0	0	0	0	0
1	0	0	0	0	0	0
2	0	0	0	0	0	0
3	0	0	0	0	0	0
4	0	0	0	0	0	0
5	1	0	0	0	0	0
6	1	0	0	0	0	0
7	0	0	0	0	0	0
8	0	0	0	0	0	0
9	0	0	0	0	0	0
10	0	0	0	0	0	0
11	1	0	0	0	0	0
12	1	0	0	0	0	0
13	1	0	0	0	0	0
14	1	0	0	0	0	0
15	0	0	0	0	0	0
16	0	0	1	0	0	0
17	1	0	0	0	0	0
18	1	0	0	0	0	0
19	2	0	0	0	0	0
20	1	0	0	0	0	0
21	1	0	0	0	0	0
22	2	0	0	0	0	0
23	0	0	0	0	0	0
24	1	0	0	0	0	0
25	0	0	0	0	0	0
26	0	0	0	0	0	0
27	0	0	0	0	0	0
28	2	0	0	0	0	0
29	0	0	0	0	0	0
30	0	0	0	0	0	0
31	1	0	0	0	0	0
32	1	0	0	0	0	0
33	0	0	0	0	0	0
34	0	0	0	0	0	0
35	0	0	0	0	0	0
36	2	0	0	0	0	0
37	0	0	0	0	0	0
38	1	0	0	0	0	0
39	1	0	0	0	0	0
40	0	0	0	0	0	0
41	1	0	0	0	0	0
42	0	0	0	0	0	0
43	1	0	0	0	0	0
44	0	0	0	0	0	0
45	0	0	0	0	0	0
46	1	0	0	0	0	0
47	0	0	0	0	0	0
48	0	0	0	0	0	0
49	2	0	0	0	0	0
50	0	0	0	0	0	0
51	2	1	0	0	0	0
52	2	0	0	0	0	0
53	4	0	0	1	0	0
54	0	0	0	0	0	0
55	0	0	0	0	0	0
56	0	0	0	0	0	0
57	0	0	0	0	0	0
58	2	0	0	0	0	0
59	1	0	0	0	0	0
60	2	0	0	0	0	0
61	0	0	0	0	0	0
62	1	0	0	0	0	0
63	0	0	0	0	0	0
64	1	0	0	0	0	0
65	1	0	0	0	0	0
66	3	0	0	0	0	0
67	0	0	0	0	0	0
68	0	0	0	0	0	0
69	0	0	0	0	0	0
70	2	0	0	0	0	0
71	3	0	0	0	0	0
72	0	0	0	0	0	0
73	1	0	0	0	0	0
74	2	0	0	0	0	0
75	0	0	0	0	0	0
76	0	0	0	0	0	0
77	1	0	0	0	0	0
78	1	0	0	0	0	0
79	0	0	0	0	0	0
80	0	0	0	0	0	0
81	1	0	0	0	0	0
82	0	0	0	0	0	0
83	0	0	0	0	0	0
84	0	0	0	0	0	0
85	1	0	0	0	0	0
86	0	0	0	0	0	0
87	0	0	0	0	0	0
88	1	0	0	0	0	0
89	0	0	0	0	0	0
90	1	0	0	0	0	0
91	0	0	0	0	0	0
92	0	0	0	0	0	0
93	0	0	0	0	0	0
94	0	0	0	0	0	0
95	1	0	0	0	0	0
96	0	0	0	0	0	0
97	0	0	0	0	0	0
98	0	0	0	0	0	0
99	0	0	0	0	0	0
100	0	0	0	0	0	0
101	0	0	0	0	0	0
102	0	0	0	0	0	0
103	0	0	0	0	0	0
104	0	0	0	0	0	0
105	0	0	0	0	0	0
106	0	0	0	0	0	0
107	0	0	0	0	0	0
108	0	0	0	0	0	0
109	0	0	0	0	0	0
110	0	0	0	0	0	0
111	0	0	0	0	0	0
112	0	0	0	0	0	0
113	0	0	0	0	0	0
114	0	0	0	0	0	0
115	0	0	0	0	0	0
116	0	0	0	0	0	0
117	0	0	0	0	0	0
118	0	0	0	0	0	0
119	0	0	0	0	0	0
120	0	0	0	0	0	0
Age report: count|total|freq/100K
Age	COVID19	UNK	DTAP	TDAP	MMR	FLUX
-1	66|477193|13	3|8220|36	0|0|0	0|0|0	1|11940|8	1|11019|9
0	0|0|0	0|0|0	0|0|0	0|0|0	0|0|0	0|0|0
1	0|0|0	0|0|0	0|0|0	0|0|0	0|0|0	0|0|0
2	0|0|0	0|0|0	0|0|0	0|0|0	0|0|0	0|0|0
3	0|0|0	0|0|0	0|0|0	0|0|0	0|0|0	0|0|0
4	0|0|0	0|0|0	0|0|0	0|0|0	0|0|0	0|0|0
5	1|2751|36	0|0|0	0|0|0	0|0|0	0|0|0	0|0|0
6	1|1921|52	0|0|0	0|0|0	0|0|0	0|0|0	0|0|0
7	0|0|0	0|0|0	0|0|0	0|0|0	0|0|0	0|0|0
8	0|0|0	0|0|0	0|0|0	0|0|0	0|0|0	0|0|0
9	0|0|0	0|0|0	0|0|0	0|0|0	0|0|0	0|0|0
10	0|0|0	0|0|0	0|0|0	0|0|0	0|0|0	0|0|0
11	1|3950|25	0|0|0	0|0|0	0|0|0	0|0|0	0|0|0
12	1|6136|16	0|0|0	0|0|0	0|0|0	0|0|0	0|0|0
13	1|4862|20	0|0|0	0|0|0	0|0|0	0|0|0	0|0|0
14	1|5306|18	0|0|0	0|0|0	0|0|0	0|0|0	0|0|0
15	0|0|0	0|0|0	0|0|0	0|0|0	0|0|0	0|0|0
16	0|0|0	0|0|0	1|66|1515	0|0|0	0|0|0	0|0|0
17	1|10274|9	0|0|0	0|0|0	0|0|0	0|0|0	0|0|0
18	1|7237|13	0|0|0	0|0|0	0|0|0	0|0|0	0|0|0
19	2|7497|26	0|0|0	0|0|0	0|0|0	0|0|0	0|0|0
20	1|8321|12	0|0|0	0|0|0	0|0|0	0|0|0	0|0|0
21	1|8716|11	0|0|0	0|0|0	0|0|0	0|0|0	0|0|0
22	2|9445|21	0|0|0	0|0|0	0|0|0	0|0|0	0|0|0
23	0|0|0	0|0|0	0|0|0	0|0|0	0|0|0	0|0|0
24	1|10985|9	0|0|0	0|0|0	0|0|0	0|0|0	0|0|0
25	0|0|0	0|0|0	0|0|0	0|0|0	0|0|0	0|0|0
26	0|0|0	0|0|0	0|0|0	0|0|0	0|0|0	0|0|0
27	0|0|0	0|0|0	0|0|0	0|0|0	0|0|0	0|0|0
28	2|13813|14	0|0|0	0|0|0	0|0|0	0|0|0	0|0|0
29	0|0|0	0|0|0	0|0|0	0|0|0	0|0|0	0|0|0
30	0|0|0	0|0|0	0|0|0	0|0|0	0|0|0	0|0|0
31	1|16291|6	0|0|0	0|0|0	0|0|0	0|0|0	0|0|0
32	1|16836|5	0|0|0	0|0|0	0|0|0	0|0|0	0|0|0
33	0|0|0	0|0|0	0|0|0	0|0|0	0|0|0	0|0|0
34	0|0|0	0|0|0	0|0|0	0|0|0	0|0|0	0|0|0
35	0|0|0	0|0|0	0|0|0	0|0|0	0|0|0	0|0|0
36	2|18013|11	0|0|0	0|0|0	0|0|0	0|0|0	0|0|0
37	0|0|0	0|0|0	0|0|0	0|0|0	0|0|0	0|0|0
38	1|18168|5	0|0|0	0|0|0	0|0|0	0|0|0	0|0|0
39	1|18319|5	0|0|0	0|0|0	0|0|0	0|0|0	0|0|0
40	0|0|0	0|0|0	0|0|0	0|0|0	0|0|0	0|0|0
41	1|17858|5	0|0|0	0|0|0	0|0|0	0|0|0	0|0|0
42	0|0|0	0|0|0	0|0|0	0|0|0	0|0|0	0|0|0
43	1|17625|5	0|0|0	0|0|0	0|0|0	0|0|0	0|0|0
44	0|0|0	0|0|0	0|0|0	0|0|0	0|0|0	0|0|0
45	0|0|0	0|0|0	0|0|0	0|0|0	0|0|0	0|0|0
46	1|17307|5	0|0|0	0|0|0	0|0|0	0|0|0	0|0|0
47	0|0|0	0|0|0	0|0|0	0|0|0	0|0|0	0|0|0
48	0|0|0	0|0|0	0|0|0	0|0|0	0|0|0	0|0|0
49	2|18171|11	0|0|0	0|0|0	0|0|0	0|0|0	0|0|0
50	0|0|0	0|0|0	0|0|0	0|0|0	0|0|0	0|0|0
51	2|19046|10	1|333|300	0|0|0	0|0|0	0|0|0	0|0|0
52	2|18246|10	0|0|0	0|0|0	0|0|0	0|0|0	0|0|0
53	4|17974|22	0|0|0	0|0|0	1|471|212	0|0|0	0|0|0
54	0|0|0	0|0|0	0|0|0	0|0|0	0|0|0	0|0|0
55	0|0|0	0|0|0	0|0|0	0|0|0	0|0|0	0|0|0
56	0|0|0	0|0|0	0|0|0	0|0|0	0|0|0	0|0|0
57	0|0|0	0|0|0	0|0|0	0|0|0	0|0|0	0|0|0
58	2|18348|10	0|0|0	0|0|0	0|0|0	0|0|0	0|0|0
59	1|18563|5	0|0|0	0|0|0	0|0|0	0|0|0	0|0|0
60	2|18607|10	0|0|0	0|0|0	0|0|0	0|0|0	0|0|0
61	0|0|0	0|0|0	0|0|0	0|0|0	0|0|0	0|0|0
62	1|17500|5	0|0|0	0|0|0	0|0|0	0|0|0	0|0|0
63	0|0|0	0|0|0	0|0|0	0|0|0	0|0|0	0|0|0
64	1|17055|5	0|0|0	0|0|0	0|0|0	0|0|0	0|0|0
65	1|18507|5	0|0|0	0|0|0	0|0|0	0|0|0	0|0|0
66	3|17752|16	0|0|0	0|0|0	0|0|0	0|0|0	0|0|0
67	0|0|0	0|0|0	0|0|0	0|0|0	0|0|0	0|0|0
68	0|0|0	0|0|0	0|0|0	0|0|0	0|0|0	0|0|0
69	0|0|0	0|0|0	0|0|0	0|0|0	0|0|0	0|0|0
70	2|15686|12	0|0|0	0|0|0	0|0|0	0|0|0	0|0|0
71	3|15057|19	0|0|0	0|0|0	0|0|0	0|0|0	0|0|0
72	0|0|0	0|0|0	0|0|0	0|0|0	0|0|0	0|0|0
73	1|14364|6	0|0|0	0|0|0	0|0|0	0|0|0	0|0|0
74	2|13852|14	0|0|0	0|0|0	0|0|0	0|0|0	0|0|0
75	0|0|0	0|0|0	0|0|0	0|0|0	0|0|0	0|0|0
76	0|0|0	0|0|0	0|0|0	0|0|0	0|0|0	0|0|0
77	1|10046|9	0|0|0	0|0|0	0|0|0	0|0|0	0|0|0
78	1|9889|10	0|0|0	0|0|0	0|0|0	0|0|0	0|0|0
79	0|0|0	0|0|0	0|0|0	0|0|0	0|0|0	0|0|0
80	0|0|0	0|0|0	0|0|0	0|0|0	0|0|0	0|0|0
81	1|6906|14	0|0|0	0|0|0	0|0|0	0|0|0	0|0|0
82	0|0|0	0|0|0	0|0|0	0|0|0	0|0|0	0|0|0
83	0|0|0	0|0|0	0|0|0	0|0|0	0|0|0	0|0|0
84	0|0|0	0|0|0	0|0|0	0|0|0	0|0|0	0|0|0
85	1|4747|21	0|0|0	0|0|0	0|0|0	0|0|0	0|0|0
86	0|0|0	0|0|0	0|0|0	0|0|0	0|0|0	0|0|0
87	0|0|0	0|0|0	0|0|0	0|0|0	0|0|0	0|0|0
88	1|3313|30	0|0|0	0|0|0	0|0|0	0|0|0	0|0|0
89	0|0|0	0|0|0	0|0|0	0|0|0	0|0|0	0|0|0
90	1|2722|36	0|0|0	0|0|0	0|0|0	0|0|0	0|0|0
91	0|0|0	0|0|0	0|0|0	0|0|0	0|0|0	0|0|0
92	0|0|0	0|0|0	0|0|0	0|0|0	0|0|0	0|0|0
93	0|0|0	0|0|0	0|0|0	0|0|0	0|0|0	0|0|0
94	0|0|0	0|0|0	0|0|0	0|0|0	0|0|0	0|0|0
95	1|931|107	0|0|0	0|0|0	0|0|0	0|0|0	0|0|0
96	0|0|0	0|0|0	0|0|0	0|0|0	0|0|0	0|0|0
97	0|0|0	0|0|0	0|0|0	0|0|0	0|0|0	0|0|0
98	0|0|0	0|0|0	0|0|0	0|0|0	0|0|0	0|0|0
99	0|0|0	0|0|0	0|0|0	0|0|0	0|0|0	0|0|0
100	0|0|0	0|0|0	0|0|0	0|0|0	0|0|0	0|0|0
101	0|0|0	0|0|0	0|0|0	0|0|0	0|0|0	0|0|0
102	0|0|0	0|0|0	0|0|0	0|0|0	0|0|0	0|0|0
103	0|0|0	0|0|0	0|0|0	0|0|0	0|0|0	0|0|0
104	0|0|0	0|0|0	0|0|0	0|0|0	0|0|0	0|0|0
105	0|0|0	0|0|0	0|0|0	0|0|0	0|0|0	0|0|0
106	0|0|0	0|0|0	0|0|0	0|0|0	0|0|0	0|0|0
107	0|0|0	0|0|0	0|0|0	0|0|0	0|0|0	0|0|0
108	0|0|0	0|0|0	0|0|0	0|0|0	0|0|0	0|0|0
109	0|0|0	0|0|0	0|0|0	0|0|0	0|0|0	0|0|0
110	0|0|0	0|0|0	0|0|0	0|0|0	0|0|0	0|0|0
111	0|0|0	0|0|0	0|0|0	0|0|0	0|0|0	0|0|0
112	0|0|0	0|0|0	0|0|0	0|0|0	0|0|0	0|0|0
113	0|0|0	0|0|0	0|0|0	0|0|0	0|0|0	0|0|0
114	0|0|0	0|0|0	0|0|0	0|0|0	0|0|0	0|0|0
115	0|0|0	0|0|0	0|0|0	0|0|0	0|0|0	0|0|0
116	0|0|0	0|0|0	0|0|0	0|0|0	0|0|0	0|0|0
117	0|0|0	0|0|0	0|0|0	0|0|0	0|0|0	0|0|0
118	0|0|0	0|0|0	0|0|0	0|0|0	0|0|0	0|0|0
119	0|0|0	0|0|0	0|0|0	0|0|0	0|0|0	0|0|0
120	0|0|0	0|0|0	0|0|0	0|0|0	0|0|0	0|0|0
Onset report:
Onset	COVID19	UNK	DTAP	TDAP	MMR	FLUX
-1	50	2			1
0	14		1	1
1	10	1
2	2
3
4	4
5	2
6	1
7	3
8	1
9
10	2
11
12
13	2
14	1
15
16	1
17
18
19	3
20	2
21
22
23
24
25	3
26	2
27
28
29	2					1
30	2
31	1
32
33	3
34
35
36	1
37
38
39
40
41
42
43	1
44
45
46
47
48
49
50
51
52	1
53
54
55
56
57
58
59
60
61
62
63
64
65
66
67
68
69
70	2
71
72	2
73
74
75
76
77
78
79
80
81
82
83
84
85	1
86
87
88
89
90
91
92
93
94
95
96
97
98
99
100
101
102
103
104
105
106
107	1
108
109
110
111
112
113
114
115
116	1
117
118
119
120
Shots report:
Shots	COVID19	UNK	DTAP	TDAP	MMR	FLUX
1	124	2	1	1
2	2
3	2	1				1
4		1			1
5
6
7
8
9
10
11
12
13
14
15
16
17
18
19
20
21
22
23
24
25
Shots frequency report: count|total|frequency/100K
Shots	COVID19	UNK	DTAP	TDAP	MMR	FLUX
1	124|1496895|8	2|17959|11	1|10968|9	1|21511|4	|0|0	|0|0
2	2|59519|3	|0|0	|0|0	|0|0	|0|0	|0|0
3	2|8740|22	1|1736|57	|0|0	|0|0	|0|0	1|1080|92
4	|0|0	1|819|122	|0|0	|0|0	1|15024|6	|0|0
5	|0|0	|0|0	|0|0	|0|0	|0|0	|0|0
6	|0|0	|0|0	|0|0	|0|0	|0|0	|0|0
7	|0|0	|0|0	|0|0	|0|0	|0|0	|0|0
8	|0|0	|0|0	|0|0	|0|0	|0|0	|0|0
9	|0|0	|0|0	|0|0	|0|0	|0|0	|0|0
10	|0|0	|0|0	|0|0	|0|0	|0|0	|0|0
11	|0|0	|0|0	|0|0	|0|0	|0|0	|0|0
12	|0|0	|0|0	|0|0	|0|0	|0|0	|0|0
13	|0|0	|0|0	|0|0	|0|0	|0|0	|0|0
14	|0|0	|0|0	|0|0	|0|0	|0|0	|0|0
15	|0|0	|0|0	|0|0	|0|0	|0|0	|0|0
16	|0|0	|0|0	|0|0	|0|0	|0|0	|0|0
17	|0|0	|0|0	|0|0	|0|0	|0|0	|0|0
18	|0|0	|0|0	|0|0	|0|0	|0|0	|0|0
19	|0|0	|0|0	|0|0	|0|0	|0|0	|0|0
20	|0|0	|0|0	|0|0	|0|0	|0|0	|0|0
21	|0|0	|0|0	|0|0	|0|0	|0|0	|0|0
22	|0|0	|0|0	|0|0	|0|0	|0|0	|0|0
23	|0|0	|0|0	|0|0	|0|0	|0|0	|0|0
24	|0|0	|0|0	|0|0	|0|0	|0|0	|0|0
25	|0|0	|0|0	|0|0	|0|0	|0|0	|0|0
Details report:
VAERS ID	Vaccine Code	Vaccine Name	Vax lot	Vax series	Vax route	Age	Gender	Onset
1735602	COVID19	COVID19 (COVID19 (PFIZER-BIONTECH))		2	IM	49	F	1
1780484	COVID19	COVID19 (COVID19 (PFIZER-BIONTECH))	PF100R pf8841	2	SYR	74	M	29
1801617	UNK	VACCINE NOT SPECIFIED (NO BRAND NAME)	Fa6780	1		51	F	1
1804461	COVID19	COVID19 (COVID19 (PFIZER-BIONTECH))	RE0178	UNK	IM	14	U	0
1813648	COVID19	COVID19 (COVID19 (PFIZER-BIONTECH))	FC3184	1	IM	12	F	26
1825034	COVID19	COVID19 (COVID19 (PFIZER-BIONTECH))	EL9266	1	IM	17	F	188
1853129	COVID19	COVID19 (COVID19 (JANSSEN))	1805031	UNK			U
1906220	COVID19	COVID19 (COVID19 (PFIZER-BIONTECH))	FD0810	2	IM	51	F	1
2501560	COVID19	COVID19 (COVID19 (MODERNA))		UNK		71	M
2501560	COVID19	COVID19 (COVID19 (MODERNA))		UNK		71	M
1998900	COVID19	COVID19 (COVID19 (PFIZER-BIONTECH))	FK5127	1	SYR	5	M	33
2013371	COVID19	COVID19 (COVID19 (MODERNA))	024M20A	3	OT	66	F
2021590	COVID19	COVID19 (COVID19 (PFIZER-BIONTECH))	FE3590	3	IM	65	F	20
2056555	COVID19	COVID19 (COVID19 (MODERNA))	032L20A	1	OT	74	M	36
2057119	COVID19	COVID19 (COVID19 (PFIZER-BIONTECH))		2			F
2075635	COVID19	COVID19 (COVID19 (JANSSEN))	204B2114	1	SYR	39	F	25
2140909	COVID19	COVID19 (COVID19 (PFIZER-BIONTECH))		3	SYR	13	F	1
2163470	DTAP	DTAP (DAPTACEL)		UNK		16	F	0
2199216	COVID19	COVID19 (COVID19 (MODERNA))	010A21A	1	SYR	22	M	255
2199216	COVID19	COVID19 (COVID19 (MODERNA))	008C21A	2	SYR	22	M	255
2242998	COVID19	COVID19 (COVID19 (PFIZER-BIONTECH))		UNK			U
2258563	COVID19	COVID19 (COVID19 (PFIZER-BIONTECH))	fl0007	1	SYR	11	M	70
2258582	COVID19	COVID19 (COVID19 (PFIZER-BIONTECH))	FK5127	1	SYR	6	M	16
2259844	COVID19	COVID19 (COVID19 (MODERNA))		4		73	M	0
2277774	COVID19	COVID19 (COVID19 (PFIZER-BIONTECH))	ew0179	3	IM	71	F	30
2329218	COVID19	COVID19 (COVID19 (PFIZER-BIONTECH))	FE3590	3	IM	52	F	172
2387677	COVID19	COVID19 (COVID19 (PFIZER-BIONTECH))		2			M
2419041	COVID19	COVID19 (COVID19 (MODERNA))		1	SYR	71	M	0
2450075	COVID19	COVID19 (COVID19 (PFIZER-BIONTECH))		2			M
2450076	COVID19	COVID19 (COVID19 (PFIZER-BIONTECH))		2			F
2460254	COVID19	COVID19 (COVID19 (MODERNA))	001J21-2A	2	IM	36	F	5
2491962	COVID19	COVID19 (COVID19 (MODERNA))		2	OT	58	M
2508724	COVID19	COVID19 (COVID19 (PFIZER-BIONTECH))	013F21A	3	SYR	46	F	26
2519721	COVID19	COVID19 (COVID19 (MODERNA))		3	IM	90	F	577
2553727	COVID19	COVID19 (COVID19 (MODERNA))	014C21A	2	IM	59	F	33
2596596	COVID19	COVID19 (COVID19 (PFIZER-BIONTECH))		3			M
2598760	COVID19	COVID19 (COVID19 (PFIZER-BIONTECH))	EK5730	2	IM	66	M	8
2615801	TDAP	TDAP (BOOSTRIX)	b32ng	UNK	IM	53	F	0
1878718	COVID19	COVID19 (COVID19 (PFIZER-BIONTECH))	FG7387	2	OT		F	25
1895576	COVID19	COVID19 (COVID19 (PFIZER-BIONTECH))	FE7051	2	OT		M	20
1908693	COVID19	COVID19 (COVID19 (MODERNA))	3003187	UNK	OT	66	F	2
1926167	COVID19	COVID19 (COVID19 (PFIZER-BIONTECH))	Unknown	1	OT		M	13
1926331	COVID19	COVID19 (COVID19 (PFIZER-BIONTECH))	FE7051	1	OT	28	F	0
1936934	COVID19	COVID19 (COVID19 (PFIZER-BIONTECH))	Unknown	2			M
1957324	COVID19	COVID19 (COVID19 (PFIZER-BIONTECH))	FK8562	1		70	M	10
1979902	COVID19	COVID19 (COVID19 (PFIZER-BIONTECH))	FC3143	2	OT		F	7
2003894	COVID19	COVID19 (COVID19 (PFIZER-BIONTECH))	FE3065	2	OT		F	1
2007611	COVID19	COVID19 (COVID19 (PFIZER-BIONTECH))	FG7387	2			M	1
2013272	COVID19	COVID19 (COVID19 (PFIZER-BIONTECH))	FF2018	2		18	M	1
2022714	COVID19	COVID19 (COVID19 (PFIZER-BIONTECH))	FE1573	1	OT		F	19
2055335	COVID19	COVID19 (COVID19 (PFIZER-BIONTECH))	unknown	3	OT		M	271
2055335	UNK	VACCINE NOT SPECIFIED (NO BRAND NAME)	Unknown	UNK	OT		M	271
2055335	UNK	VACCINE NOT SPECIFIED (NO BRAND NAME)	Unknown	UNK	OT		M	271
2063544	COVID19	COVID19 (COVID19 (PFIZER-BIONTECH))		1		51	M	0
2085715	COVID19	COVID19 (COVID19 (MODERNA))		1	OT	21	F
2096846	COVID19	COVID19 (COVID19 (PFIZER-BIONTECH))	FE8244	2	OT		F	30
2114933	COVID19	COVID19 (COVID19 (PFIZER-BIONTECH))	EW4815	2	OT	36	M	107
2114957	COVID19	COVID19 (COVID19 (PFIZER-BIONTECH))	1F1003A	3	OT		F	2
2124899	COVID19	COVID19 (COVID19 (PFIZER-BIONTECH))	Unknown	1	OT		M	10
2125029	COVID19	COVID19 (COVID19 (PFIZER-BIONTECH))		3	OT		M	1
2159040	COVID19	COVID19 (COVID19 (PFIZER-BIONTECH))	FG7911	3	OT	95	F	33
2159071	COVID19	COVID19 (COVID19 (PFIZER-BIONTECH))	Unknown	UNK	OT	70	M
2159814	COVID19	COVID19 (COVID19 (PFIZER-BIONTECH))		1			M
2163859	COVID19	COVID19 (COVID19 (PFIZER-BIONTECH))		1	OT		M
2163918	COVID19	COVID19 (COVID19 (PFIZER-BIONTECH))		2	OT		M	25
2166737	COVID19	COVID19 (COVID19 (PFIZER-BIONTECH))	FH6495	3	OT		F	0
2169471	COVID19	COVID19 (COVID19 (PFIZER-BIONTECH))		1			M
2169709	COVID19	COVID19 (COVID19 (PFIZER-BIONTECH))		1			M
2171965	COVID19	COVID19 (COVID19 (PFIZER-BIONTECH))	FG6273	2	OT	41	F	7
2178537	COVID19	COVID19 (COVID19 (PFIZER-BIONTECH))	FNG618	3	OT		M	0
2180804	COVID19	COVID19 (COVID19 (PFIZER-BIONTECH))	1F1012A	3	OT		M	85
2180805	COVID19	COVID19 (COVID19 (PFIZER-BIONTECH))	1F1019A	3	OT		F	0
2182680	COVID19	COVID19 (COVID19 (PFIZER-BIONTECH))	Unknown	1	OT		F	4
2193252	COVID19	COVID19 (COVID19 (PFIZER-BIONTECH))	Unknown	3	OT		F	14
2197586	COVID19	COVID19 (COVID19 (PFIZER-BIONTECH))	FE7051	2	OT		M	116
2198124	COVID19	COVID19 (COVID19 (PFIZER-BIONTECH))	FN0087	3			F	19
2210698	COVID19	COVID19 (COVID19 (MODERNA))		UNK	OT	20	U
2212491	COVID19	COVID19 (COVID19 (PFIZER-BIONTECH))		2	OT		F	70
2227190	COVID19	COVID19 (COVID19 (PFIZER-BIONTECH))	FE8405	2	OT		M	31
2227333	COVID19	COVID19 (COVID19 (PFIZER-BIONTECH))		UNK			F
2230813	COVID19	COVID19 (COVID19 (PFIZER-BIONTECH))		2			F
2233105	COVID19	COVID19 (COVID19 (PFIZER-BIONTECH))		UNK			F
2239891	COVID19	COVID19 (COVID19 (PFIZER-BIONTECH))	EJ6789	1	OT	62	F	13
2242263	COVID19	COVID19 (COVID19 (PFIZER-BIONTECH))		1			M
2245124	COVID19	COVID19 (COVID19 (MODERNA))	3002184	1	OT	77	F	4
2262549	COVID19	COVID19 (COVID19 (PFIZER-BIONTECH))	FP8191	4	OT		M	0
2280183	COVID19	COVID19 (COVID19 (MODERNA))		2	OT	52	F
2292180	COVID19	COVID19 (COVID19 (UNKNOWN))		UNK			U
2297431	COVID19	COVID19 (COVID19 (PFIZER-BIONTECH))		3		31	M	0
2299234	COVID19	COVID19 (COVID19 (PFIZER-BIONTECH))	FG7911	3	OT		M
2311015	COVID19	COVID19 (COVID19 (MODERNA))		UNK	OT		M
2312285	COVID19	COVID19 (COVID19 (MODERNA))		UNK	OT		M
2312288	COVID19	COVID19 (COVID19 (MODERNA))		UNK	OT		F
2312289	COVID19	COVID19 (COVID19 (MODERNA))		UNK	OT		F
2319856	COVID19	COVID19 (COVID19 (PFIZER-BIONTECH))		2			F
2321878	MMR	MEASLES + MUMPS + RUBELLA (MMR II)		UNK	OT		F
2321878	UNK	VACCINE NOT SPECIFIED (NO BRAND NAME)		UNK	OT		F
2321878	UNK	VACCINE NOT SPECIFIED (NO BRAND NAME)		UNK	OT		F
2321878	UNK	VACCINE NOT SPECIFIED (NO BRAND NAME)		UNK	OT		F
2357192	COVID19	COVID19 (COVID19 (UNKNOWN))	AB0011	UNK			M	29
2357192	COVID19	COVID19 (COVID19 (UNKNOWN))	DV46684	UNK			M	29
2357192	FLUX	INFLUENZA (SEASONAL) (NO BRAND NAME)	UNK	UNK			M	29
2360542	COVID19	COVID19 (COVID19 (PFIZER-BIONTECH))	ER9470	2			F	0
2363581	COVID19	COVID19 (COVID19 (PFIZER-BIONTECH))	EY0779	2			F	215
2370936	COVID19	COVID19 (COVID19 (PFIZER-BIONTECH))	Unknown	2	OT	88	M	72
2390786	COVID19	COVID19 (COVID19 (PFIZER-BIONTECH))	33233TB	2	OT	19	F	0
2401871	COVID19	COVID19 (COVID19 (PFIZER-BIONTECH))	ER9470	1	IM		F
2409199	COVID19	COVID19 (COVID19 (UNKNOWN))		2			M
2418792	COVID19	COVID19 (COVID19 (PFIZER-BIONTECH))		2			U
2439179	COVID19	COVID19 (COVID19 (PFIZER-BIONTECH))		3			M
2456244	COVID19	COVID19 (COVID19 (PFIZER-BIONTECH))		1			M	7
2460959	COVID19	COVID19 (COVID19 (PFIZER-BIONTECH))	1F1023A	2		28	F
2461032	COVID19	COVID19 (COVID19 (MODERNA))		2	OT	24	F	1
2476639	COVID19	COVID19 (COVID19 (PFIZER-BIONTECH))		1			M	4
2478783	COVID19	COVID19 (COVID19 (PFIZER-BIONTECH))		1			M	4
2502481	COVID19	COVID19 (COVID19 (PFIZER-BIONTECH))		2			M
2519885	COVID19	COVID19 (COVID19 (PFIZER-BIONTECH))	ACC1336	4	OT	78	F	6
2528094	COVID19	COVID19 (COVID19 (MODERNA))		2	OT	19	M
2543952	COVID19	COVID19 (COVID19 (PFIZER-BIONTECH))		2			M
2548554	COVID19	COVID19 (COVID19 (MODERNA))		2	OT	22	M
2548689	COVID19	COVID19 (COVID19 (PFIZER-BIONTECH))	FE7053	3			F
2549205	COVID19	COVID19 (COVID19 (PFIZER-BIONTECH))	GJ2552	4			F	5
2551747	UNK	VACCINE NOT SPECIFIED (NO BRAND NAME)	ND0222001	UNK	IM		U
2577473	COVID19	COVID19 (COVID19 (PFIZER-BIONTECH))	FD9234	2		49	M
2583836	COVID19	COVID19 (COVID19 (PFIZER-BIONTECH))	SCTN4	1		60	M
2585458	COVID19	COVID19 (COVID19 (PFIZER-BIONTECH))	SCJ46	1		53	F	1
2585492	COVID19	COVID19 (COVID19 (PFIZER-BIONTECH))	SDHP9	4		53	F
2585493	COVID19	COVID19 (COVID19 (PFIZER-BIONTECH))	SCPT7	2		53	F	72
2585494	COVID19	COVID19 (COVID19 (PFIZER-BIONTECH))	SCPT7	2		53	F
2593378	COVID19	COVID19 (COVID19 (PFIZER-BIONTECH))		UNK			M
2597444	COVID19	COVID19 (COVID19 (PFIZER-BIONTECH))	ET3674	2	OT	85	F	491
2605272	COVID19	COVID19 (COVID19 (PFIZER-BIONTECH))	SCVK4	3		58	F	19
2613641	COVID19	COVID19 (COVID19 (MODERNA))		UNK	OT	81	M	0
2628864	COVID19	COVID19 (COVID19 (MODERNA))	3002183	1	OT	32	F	43
2646759	COVID19	COVID19 (COVID19 (PFIZER-BIONTECH))	31101TB	3	OT	38	M
2650740	COVID19	COVID19 (COVID19 (PFIZER-BIONTECH))	FD4555	UNK	OT	43	F	0
2652230	COVID19	COVID19 (COVID19 (MODERNA))		2	OT	60	M
2654186	COVID19	COVID19 (COVID19 (PFIZER-BIONTECH))	SCVT5	3	OT	64	M	1
2670204	COVID19	COVID19 (COVID19 (PFIZER-BIONTECH))		UNK			U
2678801	COVID19	COVID19 (COVID19 (PFIZER-BIONTECH))		3			M
2688407	COVID19	COVID19 (COVID19 (PFIZER-BIONTECH))	1D0018A	2			F	52
2688414	COVID19	COVID19 (COVID19 (PFIZER-BIONTECH))		1			F

## Sheet: Vasculitis
['Vasculitis']
Vaccine code report
Vaccine name	Symptoms	Administered	Frequency
COVID19	1124	1634153	68
HEP	213	75476	282
FLU3	102	97624	104
MMR	79	89659	88
FLUX	71	34142	207
HIBV	45	60151	74
DTAP	45	64108	70
HPV4	44	47277	93
HEPA	43	44185	97
VARZOS	40	120824	33
PPV	39	71426	54
VARCEL	38	85224	44
PNC13	37	41775	88
IPV	32	44537	71
OPV	28	24899	112
UNK	26	33974	76
FLU4	25	46657	53
PNC	24	28560	84
HEPAB	23	6486	354
DTP	21	24434	85
TDAP	18	45855	39
TYP	16	10391	153
TD	15	19084	78
ANTH	13	9361	138
6VAX-F	13	5828	223
MEN	12	5350	224
HPV2	12	4925	243
RV1	11	10854	101
COVID19-2	11	39293	27
DTPHIB	10	6376	156
LYME	10	2226	449
RAB	8	6081	131
TTOX	7	3804	184
RV5	7	25071	27
MENB	7	14094	49
SMALL	6	5902	101
FLU(H1N1)	6	9183	65
MNQ	6	29053	20
DTAPIPV	5	13464	37
DTAPIPVHIB	5	12427	40
HPV9	5	21735	23
DT	4	2848	140
YF	4	4551	87
HBHEPB	4	5580	71
RUB	3	967	310
MMRV	3	20744	14
DTPIPV	3	707	424
JEV	2	566	353
FLUX(H1N1)	2	2686	74
FLUN(H1N1)	2	2892	69
FLUN4	2	4516	44
FLUA3	2	3400	58
DTPPVHBHPB	2	884	226
MEA	2	820	243
ADEN	1	11	9090
DTAPHEPBIP	1	12512	7
FLUR4	1	3068	32
FLUC4	1	7019	14
FLUA4	1	3281	30
SMALLMNK	1	1896	52
MU	1	239	418
RVX	1	2415	41
DTIPV	1	467	214
FLUN3	1	6461	15
HPVX	1	2862	34
Vaccine name report
Vaccine name	Symptoms	Administered	Frequency
COVID19 (COVID19 (PFIZER-BIONTECH))	811	965666	83
COVID19 (COVID19 (MODERNA))	248	555712	44
HEP B (ENGERIX-B)	125	35400	353
INFLUENZA (SEASONAL) (NO BRAND NAME)	67	32989	203
MEASLES + MUMPS + RUBELLA (MMR II)	63	78310	80
HEP B (RECOMBIVAX HB)	57	28079	202
COVID19 (COVID19 (JANSSEN))	56	98568	56
HPV (GARDASIL)	44	47277	93
PNEUMO (PREVNAR13)	37	41775	88
VARICELLA (VARIVAX)	36	81886	43
HEP A (HAVRIX)	31	24256	127
PNEUMO (PNEUMOVAX)	28	61621	45
VACCINE NOT SPECIFIED (NO BRAND NAME)	26	31019	83
INFLUENZA (SEASONAL) (FLUZONE)	25	36871	67
PNEUMO (PREVNAR)	24	28560	84
ZOSTER LIVE (ZOSTAVAX)	23	42792	53
DTAP (INFANRIX)	22	23866	92
HEP A + HEP B (TWINRIX)	22	6293	349
HEP B (NO BRAND NAME)	21	8400	250
DTP (NO BRAND NAME)	20	16294	122
POLIO VIRUS, ORAL (ORIMUNE)	19	22419	84
INFLUENZA (SEASONAL) (FLUVIRIN)	19	18518	102
INFLUENZA (SEASONAL) (FLUARIX)	18	5940	303
ZOSTER (SHINGRIX)	16	68714	23
POLIO VIRUS, INACT. (NO BRAND NAME)	15	8261	181
HIB (ACTHIB)	13	22919	56
HIB (HIBTITER)	12	14676	81
TD ADSORBED (NO BRAND NAME)	12	14119	84
HPV (CERVARIX)	12	4925	243
MEASLES + MUMPS + RUBELLA (NO BRAND NAME)	11	8105	135
ANTHRAX (BIOTHRAX)	11	6451	170
ROTAVIRUS (ROTARIX)	11	10854	101
HIB (NO BRAND NAME)	10	4694	213
INFLUENZA (SEASONAL) (FLUSHIELD)	10	4257	234
LYME (LYMERIX)	10	2224	449
INFLUENZA (SEASONAL) (FLUZONE HIGH-DOSE)	10	16561	60
DTAP+IPV+HEPB+HIB (INFANRIX HEXA)	10	4284	233
POLIO VIRUS, ORAL (NO BRAND NAME)	9	2480	362
DTAP (TRIPEDIA)	9	14560	61
POLIO VIRUS, INACT. (IPOL)	9	26172	34
TDAP (BOOSTRIX)	9	17987	50
COVID19 (COVID19 (UNKNOWN))	9	13824	65
HEP B (FOREIGN)	8	2289	349
DTP + HIB (TETRAMUNE)	8	5940	134
DTAP (NO BRAND NAME)	8	5865	136
POLIO VIRUS, INACT. (POLIOVAX)	8	10104	79
HEP A (VAQTA)	8	16725	47
MENINGOCOCCAL (MENOMUNE)	8	1492	536
TYPHOID VI POLYSACCHARIDE (TYPHIM VI)	8	5098	156
TDAP (ADACEL)	8	24751	32
ROTAVIRUS (ROTATEQ)	7	25071	27
INFLUENZA (SEASONAL) (FLUOGEN)	6	1811	331
TETANUS TOXOID (NO BRAND NAME)	6	2746	218
PNEUMO (PNU-IMUNE)	6	2986	200
INFLUENZA (SEASONAL) (FLUARIX QUADRIVALENT)	6	11571	51
INFLUENZA (SEASONAL) (FLUZONE QUADRIVALENT)	6	16347	36
COVID19 (COVID19 (PFIZER-BIONTECH BIVALENT))	6	22813	26
HIB (HIBERIX)	6	2645	226
MENINGOCOCCAL B (BEXSERO)	6	10508	57
INFLUENZA (SEASONAL) (AFLURIA)	5	7471	66
PNEUMO (NO BRAND NAME)	5	6819	73
INFLUENZA (SEASONAL) (AFLURIA QUADRIVALENT)	5	5420	92
HPV (GARDASIL 9)	5	21735	23
INFLUENZA (SEASONAL) (FLUZONE HIGH-DOSE QUADRIVALENT)	5	7019	71
COVID19 (COVID19 (MODERNA BIVALENT))	5	16480	30
TYPHOID VI POLYSACCHARIDE (NO BRAND NAME)	5	1836	272
DT ADSORBED (NO BRAND NAME)	4	2481	161
HIB + HEP B (COMVAX)	4	5564	71
HEP A (NO BRAND NAME)	4	3204	124
DTAP (DAPTACEL)	4	16336	24
INFLUENZA (H1N1) (H1N1 (MONOVALENT) (SANOFI))	4	5039	79
DTAP + IPV + HIB (PENTACEL)	4	9705	41
MENINGOCOCCAL (NO BRAND NAME)	4	3784	105
MEASLES + MUMPS + RUBELLA (PRIORIX)	4	1171	341
INFLUENZA (SEASONAL) (FOREIGN)	4	1153	346
RABIES (IMOVAX)	3	2348	127
HIB (PEDVAXHIB)	3	13654	21
SMALLPOX (DRYVAX)	3	3367	89
INFLUENZA (SEASONAL) (FLULAVAL)	3	3329	90
MENINGOCOCCAL CONJUGATE (MENACTRA)	3	19010	15
SMALLPOX (ACAM2000)	3	1883	159
MEASLES + MUMPS + RUBELLA + VARICELLA (PROQUAD)	3	20115	14
DTP + IPV (NO BRAND NAME)	3	707	424
INFLUENZA (SEASONAL) (TIV DRESDEN)	3	1134	264
DTAP+IPV+HEPB+HIB (NO BRAND NAME)	3	1462	205
RUBELLA (NO BRAND NAME)	2	113	1769
YELLOW FEVER (YF-VAX)	2	3650	54
DTAP (ACEL-IMUNE)	2	3378	59
ANTHRAX (NO BRAND NAME)	2	2909	68
INFLUENZA (SEASONAL) (FLU-IMUNE)	2	304	657
RABIES (RABAVERT)	2	1732	115
INFLUENZA (H1N1) (H1N1 (MONOVALENT) (UNKNOWN))	2	2686	74
INFLUENZA (H1N1) (H1N1 (MONOVALENT) (MEDIMMUNE))	2	2892	69
MENINGOCOCCAL CONJUGATE (MENVEO)	2	8652	23
INFLUENZA (SEASONAL) (FLULAVAL QUADRIVALENT)	2	5569	35
INFLUENZA (SEASONAL) (FLUAD)	2	3326	60
DTAP+IPV+HIB+HEPB (VAXELIS)	2	884	226
TYPHOID LIVE ORAL TY21A (VIVOTIF)	2	3150	63
RABIES (RABIPUR)	2	710	281
DTAP + IPV (INFANRIX TETRA)	2	914	218
DTAP + IPV (UNKNOWN)	2	1281	156
RUBELLA (MERUVAX II)	1	845	118
DTP (TRI-IMMUNOL)	1	8137	12
TYPHOID VI POLYSACCHARIDE (ACETONE INACTIVATED DRIED)	1	167	598
HIB (PROHIBIT)	1	1472	67
MEASLES + MUMPS + RUBELLA (MMR I)	1	493	202
ADENOVIRUS (TYPE 7, NO BRAND NAME)	1	5	20000
RABIES (NO BRAND NAME)	1	870	114
DTP + HIB (DTP + ACTHIB)	1	107	934
JAPANESE ENCEPHALITIS (JE-VAX)	1	350	285
TETANUS DIPHTHERIA (NO BRAND NAME)	1	2380	42
DTAP + IPV (KINRIX)	1	9558	10
INFLUENZA (SEASONAL) (FLUMIST QUADRIVALENT)	1	3764	26
TD ADSORBED (TDVAX)	1	1181	84
VARICELLA (NO BRAND NAME)	1	2951	33
DTAP + HEPB + IPV (PEDIARIX)	1	12274	8
INFLUENZA (SEASONAL) (FLUBLOK QUADRIVALENT)	1	3068	32
MENINGOCOCCAL B (TRUMENBA)	1	3586	27
INFLUENZA (SEASONAL) (FLUCELVAX QUADRIVALENT)	1	7019	14
HEP A + HEP B (NO BRAND NAME)	1	193	518
INFLUENZA (SEASONAL) (FLUAD QUADRIVALENT)	1	3281	30
HEP B (HEPLISAV-B)	1	1158	86
SMALLPOX + MONKEYPOX (JYNNEOS)	1	1896	52
JAPANESE ENCEPHALITIS (J-VAX)	1	216	462
DTP + HIB (NO BRAND NAME)	1	329	303
MEASLES (ATTENUVAX)	1	626	159
MENINGOCOCCAL CONJUGATE (NO BRAND NAME)	1	431	232
HEP B (GENHEVAC B)	1	146	684
TD ADSORBED (TD-RIX)	1	78	1282
MEASLES (NO BRAND NAME)	1	190	526
MUMPS (NO BRAND NAME)	1	73	1369
ROTAVIRUS (NO BRAND NAME)	1	2415	41
DTAP + IPV + HIB (INFANRIX QUINTA)	1	1417	70
INFLUENZA (H1N1) (H1N1 (MONOVALENT) (CSL))	1	502	199
INFLUENZA (H1N1) (H1N1 (MONOVALENT) (GSK))	1	193	518
TDAP (NO BRAND NAME)	1	3117	32
DT + IPV (NO BRAND NAME)	1	436	229
YELLOW FEVER (NO BRAND NAME)	1	592	168
INFLUENZA (SEASONAL) (FLUMIST)	1	6445	15
INFLUENZA (SEASONAL) (FLUENZ TETRA)	1	752	132
INFLUENZA (SEASONAL) (FLUVAX)	1	135	740
ZOSTER (NO BRAND NAME)	1	9318	10
TETANUS TOXOID (TEVAX)	1	40	2500
YELLOW FEVER (STAMARIL)	1	309	323
INFLUENZA (SEASONAL) (QIV DRESDEN)	1	469	213
HPV (NO BRAND NAME)	1	2862	34
VARICELLA (VARILRIX)	1	387	258
Age report:
Age	MMR	HEP	FLUX	RUB	DT	PPV	FLU3	DTP	OPV	HIBV	RAB	TD	YF	DTAP	TTOX	TYP	VARCEL	DTPHIB	HEPA	IPV	LYME	HBHEPB	ANTH	MEN	ADEN	PNC	JEV	SMALL	HEPAB	UNK	TDAP	HPV4	RV5	VARZOS	FLU(H1N1)	FLUX(H1N1)	FLUN(H1N1)	MNQ	PNC13	DTAPIPV	MMRV	FLUN4	FLU4	DTAPIPVHIB	RV1	DTAPHEPBIP	FLUR4	HPV9	MENB
-1	8	19	18	1	0	10	11	2	2	1	1	2	1	0	2	2	3	1	13	1	0	0	0	1	0	1	0	0	4	9	2	8	2	18	0	0	0	2	8	0	0	0	5	0	1	0	0	0	1
0	1	14	1	0	0	0	1	5	6	24	0	0	0	18	0	0	1	4	1	16	0	2	0	0	0	16	0	0	0	0	0	0	5	0	0	0	0	0	19	2	0	0	0	4	10	1	0	0	3
1	36	5	0	0	1	0	0	6	7	13	0	0	0	8	0	0	12	3	5	4	0	1	0	1	0	2	0	0	0	0	0	0	0	0	2	0	0	0	3	0	2	0	0	1	0	0	0	0	0
2	2	3	0	0	0	0	0	3	4	4	0	0	0	4	0	0	2	0	1	1	0	1	0	0	0	1	0	0	0	0	0	0	0	0	0	0	0	0	2	0	0	0	0	0	0	0	0	0	1
3	1	3	0	0	0	0	0	0	1	1	0	0	0	0	0	0	4	1	0	0	0	0	0	0	0	1	0	0	0	0	0	0	0	0	0	0	0	0	0	1	0	0	0	0	0	0	0	0	0
4	8	2	0	0	0	0	0	2	4	1	0	0	0	5	0	0	3	0	0	1	0	0	0	0	0	0	0	0	0	0	0	0	0	0	0	0	0	0	0	1	0	0	0	0	0	0	0	0	0
5	5	2	0	0	1	0	1	0	2	0	0	0	0	6	0	0	3	0	0	0	0	0	0	0	0	0	0	0	0	0	0	0	0	0	0	0	1	0	0	0	0	0	0	0	0	0	0	0	0
6	1	2	0	0	0	0	0	0	0	0	0	0	0	0	0	0	1	0	0	0	0	0	0	0	0	0	0	0	0	0	0	0	0	0	0	0	0	0	0	0	1	0	2	0	0	0	0	0	1
7	1	5	0	0	0	0	0	0	0	1	0	1	0	1	0	0	2	0	0	1	0	0	0	0	0	0	0	0	0	0	0	0	0	0	1	0	0	0	0	0	0	0	0	0	0	0	0	0	0
8	1	1	0	0	0	0	1	0	0	0	0	0	0	0	0	0	0	0	0	0	0	0	0	0	0	0	0	0	0	0	0	1	0	0	0	0	0	0	0	0	0	1	0	0	0	0	0	0	0
9	0	1	0	0	0	0	1	0	0	0	0	0	0	0	0	0	0	0	1	0	0	0	0	0	0	0	0	0	0	0	0	0	0	0	0	0	0	0	0	0	0	0	0	0	0	0	0	0	0
10	0	0	0	0	0	0	0	0	0	0	0	0	0	0	0	0	0	0	0	0	0	0	0	0	0	0	0	0	0	0	0	0	0	0	0	0	0	0	0	0	0	0	0	0	0	0	0	0	0
11	0	2	0	0	0	0	0	0	0	0	0	0	0	0	0	0	0	0	0	0	0	0	0	0	0	0	0	0	0	0	0	2	0	0	0	0	0	0	0	0	0	0	0	0	0	0	0	0	0
12	1	8	0	0	1	0	0	0	0	0	0	0	0	0	0	0	1	0	0	0	0	0	0	1	0	1	0	0	0	0	2	4	0	0	0	0	0	1	0	0	0	0	0	0	0	0	0	0	0
13	1	2	0	0	0	0	0	0	0	0	0	0	0	0	0	0	1	0	0	0	0	0	0	0	0	0	0	0	0	0	0	4	0	0	0	0	0	0	0	1	0	0	1	0	0	0	0	0	0
14	0	2	0	0	0	0	2	0	0	0	0	0	0	0	0	0	0	0	0	0	0	0	0	0	0	0	0	0	0	0	0	1	0	0	0	0	0	0	0	0	0	0	0	0	0	0	0	0	0
15	1	2	0	0	0	0	1	0	0	0	0	0	0	0	0	0	0	0	0	0	0	0	0	0	0	0	0	0	0	0	0	4	0	0	0	0	0	0	0	0	0	0	0	0	0	0	0	1	0
16	0	3	0	0	0	0	0	0	0	0	1	0	0	0	0	0	0	0	0	0	0	0	0	1	0	0	0	0	1	0	0	1	0	0	0	0	0	1	0	0	0	1	0	0	0	0	0	0	1
17	2	4	0	0	0	1	0	0	1	0	0	0	0	0	0	0	0	0	0	0	0	0	0	2	1	0	0	0	0	0	0	4	0	0	0	0	0	0	0	0	0	0	0	0	0	0	0	1	0
18	0	7	0	0	0	0	0	0	0	0	0	0	0	0	0	1	0	0	3	0	0	0	0	2	0	0	0	0	1	0	0	4	0	0	0	0	0	1	0	0	0	0	1	0	0	0	0	1	0
19	1	1	0	0	0	0	0	0	0	0	0	1	0	0	0	1	0	0	1	1	0	0	0	1	0	0	0	0	0	0	0	1	0	0	0	0	0	0	0	0	0	0	0	0	0	0	0	0	0
20	1	6	0	0	0	0	0	0	0	0	1	0	0	0	0	0	0	0	0	0	0	0	0	1	0	0	0	0	0	0	0	1	0	0	0	0	0	0	0	0	0	0	0	0	0	0	0	0	0
21	0	3	0	0	0	0	0	0	0	0	0	0	0	0	0	0	0	0	0	0	0	0	1	0	0	0	0	1	1	0	0	2	0	0	0	0	0	1	0	0	0	0	0	0	0	0	0	0	0
22	1	3	0	1	0	0	0	0	0	0	0	2	0	0	0	0	0	0	1	0	0	0	0	0	0	0	0	0	0	0	0	1	0	0	0	1	0	0	0	0	0	0	0	0	0	0	0	0	0
23	0	2	0	0	0	0	1	0	0	0	0	0	0	0	0	0	0	0	0	0	0	0	0	0	0	0	0	0	0	0	0	1	0	0	0	0	0	0	0	0	0	0	0	0	0	0	0	0	0
24	0	1	0	0	0	0	0	0	0	0	1	0	0	0	0	0	0	0	1	0	0	0	0	0	0	0	0	1	1	0	0	0	0	0	0	0	0	0	0	0	0	0	0	0	0	0	0	0	0
25	0	4	2	0	0	0	1	0	0	0	0	0	0	0	0	1	0	0	0	0	0	0	1	0	0	0	0	0	2	0	1	2	0	0	0	0	0	0	0	0	0	0	0	0	0	0	0	0	0
26	0	7	0	0	0	0	0	0	0	0	0	0	0	0	0	0	1	0	1	0	1	0	0	0	0	0	0	0	0	0	0	0	0	0	0	0	0	0	0	0	0	0	0	0	0	0	0	1	0
27	0	4	0	0	0	0	1	0	0	0	0	0	0	0	1	0	0	0	0	1	0	0	2	0	0	0	0	0	0	0	0	2	0	0	0	0	0	0	0	0	0	0	0	0	0	0	0	0	0
28	1	4	0	0	0	0	0	0	0	0	0	0	1	0	0	0	0	0	0	0	0	0	0	0	0	0	0	0	0	0	0	0	0	0	0	0	0	0	0	0	0	0	0	0	0	0	0	0	0
29	1	4	1	0	0	0	0	0	0	0	0	1	0	0	0	0	1	0	0	0	0	0	0	0	0	0	0	1	0	0	0	0	0	0	0	0	0	0	0	0	0	0	0	0	0	0	0	0	0
30	0	1	0	0	0	0	2	0	0	0	0	0	0	0	0	0	0	0	0	0	0	0	1	0	0	0	0	1	0	0	0	0	0	0	0	0	0	0	0	0	0	0	0	0	0	0	0	0	0
31	0	0	0	0	0	0	1	0	0	0	0	0	0	0	0	0	1	0	0	0	0	0	1	0	0	0	0	0	0	0	0	0	0	0	0	0	0	0	0	0	0	0	0	0	0	0	0	0	0
32	0	3	0	0	0	0	1	1	0	0	0	0	0	0	0	0	0	0	0	0	1	0	0	0	0	0	0	1	1	0	0	0	0	0	0	0	0	0	0	0	0	0	0	0	0	0	0	0	0
33	0	3	1	0	0	0	0	0	0	0	0	0	0	0	0	0	0	0	0	0	0	0	0	0	0	0	0	0	0	0	0	1	0	0	0	0	0	0	0	0	0	0	0	0	0	0	0	0	0
34	0	0	0	0	0	0	1	0	0	0	0	0	0	0	0	0	0	0	0	1	1	0	1	0	0	0	0	0	1	0	0	0	0	0	0	0	0	0	0	0	0	0	0	0	0	0	0	0	0
35	0	3	0	0	0	0	0	0	0	0	0	0	0	1	0	0	0	0	0	0	0	0	1	0	0	0	0	0	0	0	0	0	0	0	0	0	0	0	0	0	0	0	0	0	0	0	0	0	0
36	1	2	0	1	0	0	0	0	0	0	0	0	0	0	0	0	0	0	0	0	0	0	0	0	0	0	0	0	0	0	1	0	0	0	0	0	0	0	0	0	0	0	1	0	0	0	0	0	0
37	0	5	1	0	0	0	2	0	0	0	0	0	0	0	0	1	0	0	0	0	0	0	1	0	0	0	0	0	0	0	0	0	0	0	0	0	0	0	0	0	0	0	0	0	0	0	0	0	0
38	0	3	0	0	0	0	2	0	0	0	0	1	0	0	0	0	1	0	0	0	1	0	0	0	0	0	0	0	1	1	1	0	0	0	0	0	0	0	0	0	0	0	0	0	0	0	0	0	0
39	0	2	1	0	0	0	1	0	0	0	0	0	0	0	0	0	0	0	0	0	0	0	0	0	0	0	0	0	1	0	0	0	0	0	0	0	0	0	0	0	0	0	0	0	0	0	0	0	0
40	1	8	1	0	0	1	0	0	0	0	0	1	1	0	0	1	0	0	3	1	0	0	1	0	0	0	0	1	0	1	2	0	0	0	0	0	0	0	0	0	0	0	0	0	0	0	0	0	0
41	0	2	0	0	0	1	1	0	0	0	1	1	0	0	0	1	0	0	0	1	0	0	0	0	0	0	0	0	2	1	1	0	0	0	0	0	0	0	0	0	0	0	0	0	0	0	0	0	0
42	0	2	0	0	0	0	0	0	0	0	1	0	0	0	0	0	0	0	0	0	0	0	0	0	0	0	1	0	2	0	0	0	0	0	0	0	0	0	0	0	0	0	1	0	0	0	0	0	0
43	0	1	0	0	0	0	0	0	0	0	0	0	0	0	0	0	0	0	0	0	0	0	0	0	0	0	0	0	0	0	0	0	0	0	0	0	0	0	0	0	0	0	0	0	0	0	0	0	0
44	0	2	1	0	0	1	0	0	0	0	2	0	0	0	2	1	0	0	0	1	0	0	0	0	0	0	0	0	0	0	0	0	0	0	0	0	1	0	0	0	0	0	0	0	0	0	0	0	0
45	0	7	1	0	0	0	1	0	0	0	0	0	0	0	0	0	1	0	1	0	0	0	1	0	0	0	0	0	0	0	0	0	0	0	0	0	0	0	0	0	0	0	0	0	0	0	0	0	0
46	0	3	2	0	0	0	2	0	0	0	0	0	0	0	1	0	0	0	0	1	0	0	0	0	0	1	0	0	1	0	1	0	0	0	1	0	0	0	0	0	0	0	0	0	0	0	0	0	0
47	0	2	2	0	0	0	3	0	0	0	0	0	0	0	0	0	0	0	0	0	0	0	0	0	0	0	0	0	0	0	0	0	0	0	0	0	0	0	0	0	0	0	0	0	0	0	0	0	0
48	1	2	0	0	0	2	3	0	0	0	0	0	0	0	0	0	0	0	0	0	0	0	0	0	0	0	0	0	0	0	0	0	0	0	0	0	0	0	0	0	0	0	1	0	0	0	0	0	0
49	0	1	0	0	0	0	1	0	0	0	0	0	0	0	0	0	0	0	0	0	0	0	0	0	0	0	0	0	1	0	1	0	0	0	0	0	0	0	0	0	0	0	0	0	0	0	1	0	0
50	0	6	1	0	0	0	3	0	0	0	0	0	0	0	0	0	0	0	0	0	0	0	0	0	0	0	0	0	0	0	0	0	0	0	0	0	0	0	0	0	0	0	0	0	0	0	0	0	0
51	1	2	0	0	0	0	1	0	0	0	0	1	0	0	0	1	0	0	3	0	0	0	0	0	0	0	0	0	1	0	2	0	0	0	0	0	0	0	0	0	0	0	1	0	0	0	0	0	0
52	0	4	2	0	1	0	2	0	1	0	0	0	0	0	0	0	0	0	1	0	0	0	0	0	0	0	0	0	0	0	1	0	0	1	0	0	0	0	0	0	0	0	0	0	0	0	0	0	0
53	0	1	2	0	0	0	5	0	0	0	0	0	0	1	0	1	0	0	0	0	0	0	1	0	0	0	0	0	0	0	1	0	0	0	1	0	0	0	0	0	0	0	0	0	0	0	0	0	0
54	0	2	3	0	0	1	1	0	0	0	0	0	0	0	0	0	0	0	0	0	0	0	0	0	0	0	0	0	0	0	0	0	0	0	0	0	0	0	0	0	0	0	0	0	0	0	0	0	0
55	1	0	1	0	0	1	1	0	0	0	0	0	1	0	0	1	0	0	1	0	1	0	0	1	0	0	0	0	0	1	0	0	0	0	0	0	0	0	0	0	0	0	0	0	0	0	0	0	0
56	0	1	0	0	0	0	1	0	0	0	0	1	0	0	0	0	0	0	0	1	0	0	0	0	0	0	0	0	1	1	0	0	0	2	0	0	0	0	0	0	0	0	0	0	0	0	0	0	0
57	0	0	2	0	0	1	2	0	0	0	0	0	0	0	0	0	0	0	0	0	0	0	0	0	0	0	0	0	0	0	0	0	0	0	0	0	0	0	0	0	0	0	0	0	0	0	0	0	0
58	0	2	1	0	0	1	1	0	0	0	0	0	0	0	0	0	0	0	0	0	0	0	0	0	0	0	0	0	0	0	0	0	0	1	1	0	0	0	0	0	0	0	0	0	0	0	0	0	0
59	0	0	0	0	0	0	0	0	0	0	0	0	0	0	0	0	0	0	0	0	2	0	0	0	0	0	0	0	0	1	0	0	0	0	0	0	0	0	0	0	0	0	0	0	0	0	0	0	0
60	0	2	0	0	0	1	3	0	0	0	0	0	0	0	0	0	0	0	0	0	0	0	0	0	0	0	0	0	0	0	0	0	0	0	0	1	0	0	0	0	0	0	0	0	0	0	0	0	0
61	0	1	0	0	0	1	3	0	0	0	0	1	0	0	0	1	0	0	0	0	0	0	1	0	0	0	0	0	1	1	0	0	0	1	0	0	0	0	0	0	0	0	0	0	0	0	0	0	0
62	0	1	0	0	0	0	0	0	0	0	0	0	0	0	0	0	0	0	0	0	1	0	0	0	0	0	0	0	0	0	0	0	0	3	0	0	0	0	0	0	0	0	0	0	0	0	0	0	0
63	0	1	1	0	0	1	2	0	0	0	0	0	0	1	0	1	0	0	0	0	0	0	0	1	0	0	1	0	0	0	0	0	0	0	0	0	0	0	0	0	0	0	0	0	0	0	0	0	0
64	0	3	1	0	0	0	4	0	0	0	0	0	0	0	0	0	0	0	0	0	1	0	0	0	0	0	0	0	0	0	0	0	0	1	0	0	0	0	1	0	0	0	1	0	0	0	0	0	0
65	0	0	1	0	0	1	1	0	0	0	0	1	0	0	0	0	0	0	2	0	0	0	0	0	0	1	0	0	0	1	0	0	0	0	0	0	0	0	2	0	0	0	2	0	0	0	0	0	0
66	0	2	0	0	0	5	2	0	0	0	0	0	0	0	1	0	0	0	0	0	0	0	0	0	0	0	0	0	0	0	0	0	0	1	0	0	0	0	0	0	0	0	0	0	0	0	0	0	0
67	0	2	2	0	0	0	2	0	0	0	0	0	0	0	0	2	0	0	2	0	0	0	0	0	0	0	0	0	0	0	0	0	0	2	0	0	0	0	1	0	0	0	0	0	0	0	0	0	0
68	0	0	3	0	0	0	3	0	0	0	0	0	0	0	0	0	0	1	0	0	0	0	0	0	0	0	0	0	0	1	0	0	0	0	0	0	0	0	0	0	0	0	0	0	0	0	0	0	0
69	0	2	0	0	0	0	1	0	0	0	0	1	0	0	0	0	0	0	0	0	0	0	0	0	0	0	0	0	0	0	1	0	0	0	0	0	0	0	0	0	0	0	0	0	0	0	0	0	0
70	0	0	2	0	0	0	1	0	0	0	0	0	0	0	0	0	0	0	0	0	0	0	0	0	0	0	0	0	0	1	0	0	0	0	0	0	0	0	1	0	0	0	0	0	0	0	0	0	0
71	0	0	3	0	0	0	1	0	0	0	0	0	0	0	0	0	0	0	0	0	0	0	0	0	0	0	0	0	0	1	0	0	0	1	0	0	0	0	0	0	0	0	0	0	0	0	0	0	0
72	0	0	2	0	0	2	1	0	0	0	0	0	0	0	0	0	0	0	0	0	0	0	0	0	0	0	0	0	0	2	1	0	0	2	0	0	0	0	0	0	0	0	1	0	0	0	0	0	0
73	0	0	0	0	0	0	2	0	0	0	0	0	0	0	0	0	0	0	0	0	1	0	0	0	0	0	0	0	0	0	0	0	0	0	0	0	0	0	0	0	0	0	1	0	0	0	0	0	0
74	0	1	0	0	0	0	0	0	0	0	0	0	0	0	0	0	0	0	0	0	0	0	0	0	0	0	0	0	0	0	0	0	0	0	0	0	0	0	0	0	0	0	1	0	0	0	0	0	0
75	0	0	0	0	0	1	1	0	0	0	0	0	0	0	0	0	0	0	0	0	0	0	0	0	0	0	0	0	0	0	0	0	0	0	0	0	0	0	0	0	0	0	1	0	0	0	0	0	0
76	0	0	2	0	0	3	1	1	0	0	0	0	0	0	0	0	0	0	1	0	0	0	0	0	0	0	0	0	0	0	0	0	0	1	0	0	0	0	0	0	0	0	0	0	0	0	0	0	0
77	0	0	2	0	0	2	1	1	0	0	0	0	0	0	0	0	0	0	0	0	0	0	0	0	0	0	0	0	0	0	0	0	0	0	0	0	0	0	0	0	0	0	1	0	0	0	0	0	0
78	0	0	0	0	0	0	2	0	0	0	0	0	0	0	0	0	0	0	0	0	0	0	0	0	0	0	0	0	0	1	0	0	0	1	0	0	0	0	0	0	0	0	1	0	0	0	0	0	0
79	0	1	1	0	0	0	3	0	0	0	0	0	0	0	0	0	0	0	0	0	0	0	0	0	0	0	0	0	0	0	0	0	0	1	0	0	0	0	0	0	0	0	1	0	0	0	0	0	0
80	0	0	1	0	0	0	1	0	0	0	0	0	0	0	0	0	0	0	0	0	0	0	0	0	0	0	0	0	0	0	0	0	0	1	0	0	0	0	0	0	0	0	0	0	0	0	0	0	0
81	0	0	0	0	0	0	1	0	0	0	0	0	0	0	0	0	0	0	0	0	0	0	0	0	0	0	0	0	0	0	0	0	0	0	0	0	0	0	0	0	0	0	1	0	0	0	0	0	0
82	0	0	1	0	0	0	1	0	0	0	0	0	0	0	0	0	0	0	0	0	0	0	0	0	0	0	0	0	0	0	0	0	0	0	0	0	0	0	0	0	0	0	0	0	0	0	0	0	0
83	0	0	1	0	0	0	0	0	0	0	0	0	0	0	0	0	0	0	0	0	0	0	0	0	0	0	0	0	0	0	0	0	0	0	0	0	0	0	0	0	0	0	0	0	0	0	0	0	0
84	0	0	1	0	0	0	1	0	0	0	0	0	0	0	0	0	0	0	0	0	0	0	0	0	0	0	0	0	0	0	0	0	0	0	0	0	0	0	0	0	0	0	0	0	0	0	0	0	0
85	0	0	0	0	0	0	0	0	0	0	0	0	0	0	0	0	0	0	0	0	0	0	0	0	0	0	0	0	0	0	0	0	0	0	0	0	0	0	0	0	0	0	0	0	0	0	0	0	0
86	0	0	0	0	0	0	2	0	0	0	0	0	0	0	0	0	0	0	0	0	0	0	0	0	0	0	0	0	0	0	0	0	0	3	0	0	0	0	0	0	0	0	0	0	0	0	0	0	0
87	0	0	0	0	0	0	0	0	0	0	0	0	0	0	0	0	0	0	0	0	0	0	0	0	0	0	0	0	0	0	0	0	0	0	0	0	0	0	0	0	0	0	0	0	0	0	0	0	0
88	0	0	0	0	0	0	0	0	0	0	0	0	0	0	0	0	0	0	0	0	0	0	0	0	0	0	0	0	0	0	0	0	0	0	0	0	0	0	0	0	0	0	0	0	0	0	0	0	0
89	0	0	2	0	0	2	2	0	0	0	0	0	0	0	0	0	0	0	0	0	0	0	0	0	0	0	0	0	0	0	0	0	0	0	0	0	0	0	0	0	0	0	0	0	0	0	0	0	0
90	0	0	1	0	0	0	0	0	0	0	0	0	0	0	0	0	0	0	0	0	0	0	0	0	0	0	0	0	0	0	0	0	0	0	0	0	0	0	0	0	0	0	0	0	0	0	0	0	0
91	0	0	0	0	0	0	0	0	0	0	0	0	0	0	0	0	0	0	0	0	0	0	0	0	0	0	0	0	0	0	0	0	0	0	0	0	0	0	0	0	0	0	0	0	0	0	0	0	0
92	0	0	0	0	0	0	0	0	0	0	0	0	0	0	0	0	0	0	0	0	0	0	0	0	0	0	0	0	0	0	0	0	0	0	0	0	0	0	0	0	0	0	0	0	0	0	0	0	0
93	0	0	0	0	0	0	1	0	0	0	0	0	0	0	0	0	0	0	0	0	0	0	0	0	0	0	0	0	0	0	0	0	0	0	0	0	0	0	0	0	0	0	0	0	0	0	0	0	0
94	0	0	0	0	0	0	0	0	0	0	0	0	0	0	0	0	0	0	0	0	0	0	0	0	0	0	0	0	0	0	0	0	0	0	0	0	0	0	0	0	0	0	0	0	0	0	0	0	0
95	0	0	0	0	0	0	0	0	0	0	0	0	0	0	0	0	0	0	0	0	0	0	0	0	0	0	0	0	0	0	0	0	0	0	0	0	0	0	0	0	0	0	0	0	0	0	0	0	0
96	0	0	0	0	0	0	0	0	0	0	0	0	0	0	0	0	0	0	0	0	0	0	0	0	0	0	0	0	0	0	0	0	0	0	0	0	0	0	0	0	0	0	0	0	0	0	0	0	0
97	0	0	0	0	0	0	0	0	0	0	0	0	0	0	0	0	0	0	0	0	0	0	0	0	0	0	0	0	0	0	0	0	0	0	0	0	0	0	0	0	0	0	0	0	0	0	0	0	0
98	0	0	0	0	0	0	0	0	0	0	0	0	0	0	0	0	0	0	0	0	0	0	0	0	0	0	0	0	0	0	0	0	0	0	0	0	0	0	0	0	0	0	0	0	0	0	0	0	0
99	0	0	0	0	0	0	0	0	0	0	0	0	0	0	0	0	0	0	0	0	0	0	0	0	0	0	0	0	0	0	0	0	0	0	0	0	0	0	0	0	0	0	0	0	0	0	0	0	0
100	0	0	0	0	0	0	0	0	0	0	0	0	0	0	0	0	0	0	0	0	0	0	0	0	0	0	0	0	0	0	0	0	0	0	0	0	0	0	0	0	0	0	0	0	0	0	0	0	0
101	0	0	0	0	0	0	0	0	0	0	0	0	0	0	0	0	0	0	0	0	0	0	0	0	0	0	0	0	0	0	0	0	0	0	0	0	0	0	0	0	0	0	0	0	0	0	0	0	0
102	0	0	0	0	0	0	0	0	0	0	0	0	0	0	0	0	0	0	0	0	0	0	0	0	0	0	0	0	0	0	0	0	0	0	0	0	0	0	0	0	0	0	0	0	0	0	0	0	0
103	0	0	0	0	0	0	0	0	0	0	0	0	0	0	0	0	0	0	0	0	0	0	0	0	0	0	0	0	0	0	0	0	0	0	0	0	0	0	0	0	0	0	0	0	0	0	0	0	0
104	0	0	0	0	0	0	0	0	0	0	0	0	0	0	0	0	0	0	0	0	0	0	0	0	0	0	0	0	0	0	0	0	0	0	0	0	0	0	0	0	0	0	0	0	0	0	0	0	0
105	0	0	0	0	0	0	0	0	0	0	0	0	0	0	0	0	0	0	0	0	0	0	0	0	0	0	0	0	0	0	0	0	0	0	0	0	0	0	0	0	0	0	0	0	0	0	0	0	0
106	0	0	0	0	0	0	0	0	0	0	0	0	0	0	0	0	0	0	0	0	0	0	0	0	0	0	0	0	0	0	0	0	0	0	0	0	0	0	0	0	0	0	0	0	0	0	0	0	0
107	0	0	0	0	0	0	0	0	0	0	0	0	0	0	0	0	0	0	0	0	0	0	0	0	0	0	0	0	0	0	0	0	0	0	0	0	0	0	0	0	0	0	0	0	0	0	0	0	0
108	0	0	0	0	0	0	0	0	0	0	0	0	0	0	0	0	0	0	0	0	0	0	0	0	0	0	0	0	0	0	0	0	0	0	0	0	0	0	0	0	0	0	0	0	0	0	0	0	0
109	0	0	0	0	0	0	0	0	0	0	0	0	0	0	0	0	0	0	0	0	0	0	0	0	0	0	0	0	0	0	0	0	0	0	0	0	0	0	0	0	0	0	0	0	0	0	0	0	0
110	0	0	0	0	0	0	0	0	0	0	0	0	0	0	0	0	0	0	0	0	0	0	0	0	0	0	0	0	0	0	0	0	0	0	0	0	0	0	0	0	0	0	0	0	0	0	0	0	0
111	0	0	0	0	0	0	0	0	0	0	0	0	0	0	0	0	0	0	0	0	0	0	0	0	0	0	0	0	0	0	0	0	0	0	0	0	0	0	0	0	0	0	0	0	0	0	0	0	0
112	0	0	0	0	0	0	0	0	0	0	0	0	0	0	0	0	0	0	0	0	0	0	0	0	0	0	0	0	0	0	0	0	0	0	0	0	0	0	0	0	0	0	0	0	0	0	0	0	0
113	0	0	0	0	0	0	0	0	0	0	0	0	0	0	0	0	0	0	0	0	0	0	0	0	0	0	0	0	0	0	0	0	0	0	0	0	0	0	0	0	0	0	0	0	0	0	0	0	0
114	0	0	0	0	0	0	0	0	0	0	0	0	0	0	0	0	0	0	0	0	0	0	0	0	0	0	0	0	0	0	0	0	0	0	0	0	0	0	0	0	0	0	0	0	0	0	0	0	0
115	0	0	0	0	0	0	0	0	0	0	0	0	0	0	0	0	0	0	0	0	0	0	0	0	0	0	0	0	0	0	0	0	0	0	0	0	0	0	0	0	0	0	0	0	0	0	0	0	0
116	0	0	0	0	0	0	0	0	0	0	0	0	0	0	0	0	0	0	0	0	0	0	0	0	0	0	0	0	0	0	0	0	0	0	0	0	0	0	0	0	0	0	0	0	0	0	0	0	0
117	0	0	0	0	0	0	0	0	0	0	0	0	0	0	0	0	0	0	0	0	0	0	0	0	0	0	0	0	0	0	0	0	0	0	0	0	0	0	0	0	0	0	0	0	0	0	0	0	0
118	0	0	0	0	0	0	0	0	0	0	0	0	0	0	0	0	0	0	0	0	0	0	0	0	0	0	0	0	0	0	0	0	0	0	0	0	0	0	0	0	0	0	0	0	0	0	0	0	0
119	0	0	0	0	0	0	0	0	0	0	0	0	0	0	0	0	0	0	0	0	0	0	0	0	0	0	0	0	0	0	0	0	0	0	0	0	0	0	0	0	0	0	0	0	0	0	0	0	0
120	0	0	0	0	0	0	0	0	0	0	0	0	0	0	0	0	0	0	0	0	0	0	0	0	0	0	0	0	0	0	0	0	0	0	0	0	0	0	0	0	0	0	0	0	0	0	0	0	0
Age report: count|total|freq/100K
Age	MMR	HEP	FLUX	RUB	DT	PPV	FLU3	DTP	OPV	HIBV	RAB	TD	YF	DTAP	TTOX	TYP	VARCEL	DTPHIB	HEPA	IPV	LYME	HBHEPB	ANTH	MEN	ADEN	PNC	JEV	SMALL	HEPAB	UNK	TDAP	HPV4	RV5	VARZOS	FLU(H1N1)	FLUX(H1N1)	FLUN(H1N1)	MNQ	PNC13	DTAPIPV	MMRV	FLUN4	FLU4	DTAPIPVHIB	RV1	DTAPHEPBIP	FLUR4	HPV9	MENB
-1	8|11940|67	19|16277|116	18|11019|163	1|186|537	0|0|0	10|13840|72	11|7754|141	2|1794|111	2|670|298	1|6212|16	1|1341|74	2|1406|142	1|559|178	0|0|0	2|769|260	2|2167|92	3|16090|18	1|234|427	13|6815|190	1|2473|40	0|0|0	0|0|0	0|0|0	1|1142|87	0|0|0	1|1693|59	0|0|0	0|0|0	4|1364|293	9|8220|109	2|3451|57	8|12921|61	2|8093|24	18|39337|45	0|0|0	0|0|0	0|0|0	2|2601|76	8|7003|114	0|0|0	0|0|0	0|0|0	5|3610|138	0|0|0	1|2769|36	0|0|0	0|0|0	0|0|0	1|4032|24
0	1|978|102	14|14617|95	1|452|221	0|0|0	0|0|0	0|0|0	1|1860|53	5|13133|38	6|12796|46	24|31979|75	0|0|0	0|0|0	0|0|0	18|14495|124	0|0|0	0|0|0	1|777|128	4|4356|91	1|776|128	16|13315|120	0|0|0	2|3017|66	0|0|0	0|0|0	0|0|0	16|15682|102	0|0|0	0|0|0	0|0|0	0|0|0	0|0|0	0|0|0	5|16540|30	0|0|0	0|0|0	0|0|0	0|0|0	0|0|0	19|14578|130	2|1260|158	0|0|0	0|0|0	0|0|0	4|8134|49	10|7721|129	1|9552|10	0|0|0	0|0|0	3|1687|177
1	36|30890|116	5|2884|173	0|0|0	0|0|0	1|244|409	0|0|0	0|0|0	6|4351|137	7|4733|147	13|17022|76	0|0|0	0|0|0	0|0|0	8|13938|57	0|0|0	0|0|0	12|25025|47	3|1386|216	5|9714|51	4|4398|90	0|0|0	1|1887|52	0|0|0	1|521|191	0|0|0	2|8068|24	0|0|0	0|0|0	0|0|0	0|0|0	0|0|0	0|0|0	0|0|0	0|0|0	2|421|475	0|0|0	0|0|0	0|0|0	3|6421|46	0|0|0	2|3852|51	0|0|0	0|0|0	1|1922|52	0|0|0	0|0|0	0|0|0	0|0|0	0|0|0
2	2|2208|90	3|802|374	0|0|0	0|0|0	0|0|0	0|0|0	0|0|0	3|761|394	4|726|550	4|1858|215	0|0|0	0|0|0	0|0|0	4|2557|156	0|0|0	0|0|0	2|2606|76	0|0|0	1|2306|43	1|809|123	0|0|0	1|170|588	0|0|0	0|0|0	0|0|0	1|1023|97	0|0|0	0|0|0	0|0|0	0|0|0	0|0|0	0|0|0	0|0|0	0|0|0	0|0|0	0|0|0	0|0|0	0|0|0	2|844|236	0|0|0	0|0|0	0|0|0	0|0|0	0|0|0	0|0|0	0|0|0	0|0|0	0|0|0	1|252|396
3	1|1428|70	3|587|511	0|0|0	0|0|0	0|0|0	0|0|0	0|0|0	0|0|0	1|385|259	1|956|104	0|0|0	0|0|0	0|0|0	0|0|0	0|0|0	0|0|0	4|2125|188	1|56|1785	0|0|0	0|0|0	0|0|0	0|0|0	0|0|0	0|0|0	0|0|0	1|612|163	0|0|0	0|0|0	0|0|0	0|0|0	0|0|0	0|0|0	0|0|0	0|0|0	0|0|0	0|0|0	0|0|0	0|0|0	0|0|0	1|340|294	0|0|0	0|0|0	0|0|0	0|0|0	0|0|0	0|0|0	0|0|0	0|0|0	0|0|0
4	8|14037|56	2|812|246	0|0|0	0|0|0	0|0|0	0|0|0	0|0|0	2|1329|150	4|2102|190	1|841|118	0|0|0	0|0|0	0|0|0	5|13054|38	0|0|0	0|0|0	3|7828|38	0|0|0	0|0|0	1|10572|9	0|0|0	0|0|0	0|0|0	0|0|0	0|0|0	0|0|0	0|0|0	0|0|0	0|0|0	0|0|0	0|0|0	0|0|0	0|0|0	0|0|0	0|0|0	0|0|0	0|0|0	0|0|0	0|0|0	1|6200|16	0|0|0	0|0|0	0|0|0	0|0|0	0|0|0	0|0|0	0|0|0	0|0|0	0|0|0
5	5|9507|52	2|948|210	0|0|0	0|0|0	1|178|561	0|0|0	1|753|132	0|0|0	2|2448|81	0|0|0	0|0|0	0|0|0	0|0|0	6|9546|62	0|0|0	0|0|0	3|4693|63	0|0|0	0|0|0	0|0|0	0|0|0	0|0|0	0|0|0	0|0|0	0|0|0	0|0|0	0|0|0	0|0|0	0|0|0	0|0|0	0|0|0	0|0|0	0|0|0	0|0|0	0|0|0	0|0|0	1|169|591	0|0|0	0|0|0	0|0|0	0|0|0	0|0|0	0|0|0	0|0|0	0|0|0	0|0|0	0|0|0	0|0|0	0|0|0
6	1|1424|70	2|505|396	0|0|0	0|0|0	0|0|0	0|0|0	0|0|0	0|0|0	0|0|0	0|0|0	0|0|0	0|0|0	0|0|0	0|0|0	0|0|0	0|0|0	1|1770|56	0|0|0	0|0|0	0|0|0	0|0|0	0|0|0	0|0|0	0|0|0	0|0|0	0|0|0	0|0|0	0|0|0	0|0|0	0|0|0	0|0|0	0|0|0	0|0|0	0|0|0	0|0|0	0|0|0	0|0|0	0|0|0	0|0|0	0|0|0	1|247|404	0|0|0	2|542|369	0|0|0	0|0|0	0|0|0	0|0|0	0|0|0	1|61|1639
7	1|524|190	5|385|1298	0|0|0	0|0|0	0|0|0	0|0|0	0|0|0	0|0|0	0|0|0	1|52|1923	0|0|0	1|100|1000	0|0|0	1|338|295	0|0|0	0|0|0	2|1388|144	0|0|0	0|0|0	1|303|330	0|0|0	0|0|0	0|0|0	0|0|0	0|0|0	0|0|0	0|0|0	0|0|0	0|0|0	0|0|0	0|0|0	0|0|0	0|0|0	0|0|0	1|162|617	0|0|0	0|0|0	0|0|0	0|0|0	0|0|0	0|0|0	0|0|0	0|0|0	0|0|0	0|0|0	0|0|0	0|0|0	0|0|0	0|0|0
8	1|430|232	1|400|250	0|0|0	0|0|0	0|0|0	0|0|0	1|475|210	0|0|0	0|0|0	0|0|0	0|0|0	0|0|0	0|0|0	0|0|0	0|0|0	0|0|0	0|0|0	0|0|0	0|0|0	0|0|0	0|0|0	0|0|0	0|0|0	0|0|0	0|0|0	0|0|0	0|0|0	0|0|0	0|0|0	0|0|0	0|0|0	1|39|2564	0|0|0	0|0|0	0|0|0	0|0|0	0|0|0	0|0|0	0|0|0	0|0|0	0|0|0	1|137|729	0|0|0	0|0|0	0|0|0	0|0|0	0|0|0	0|0|0	0|0|0
9	0|0|0	1|508|196	0|0|0	0|0|0	0|0|0	0|0|0	1|512|195	0|0|0	0|0|0	0|0|0	0|0|0	0|0|0	0|0|0	0|0|0	0|0|0	0|0|0	0|0|0	0|0|0	1|540|185	0|0|0	0|0|0	0|0|0	0|0|0	0|0|0	0|0|0	0|0|0	0|0|0	0|0|0	0|0|0	0|0|0	0|0|0	0|0|0	0|0|0	0|0|0	0|0|0	0|0|0	0|0|0	0|0|0	0|0|0	0|0|0	0|0|0	0|0|0	0|0|0	0|0|0	0|0|0	0|0|0	0|0|0	0|0|0	0|0|0
10	0|0|0	0|0|0	0|0|0	0|0|0	0|0|0	0|0|0	0|0|0	0|0|0	0|0|0	0|0|0	0|0|0	0|0|0	0|0|0	0|0|0	0|0|0	0|0|0	0|0|0	0|0|0	0|0|0	0|0|0	0|0|0	0|0|0	0|0|0	0|0|0	0|0|0	0|0|0	0|0|0	0|0|0	0|0|0	0|0|0	0|0|0	0|0|0	0|0|0	0|0|0	0|0|0	0|0|0	0|0|0	0|0|0	0|0|0	0|0|0	0|0|0	0|0|0	0|0|0	0|0|0	0|0|0	0|0|0	0|0|0	0|0|0	0|0|0
11	0|0|0	2|1373|145	0|0|0	0|0|0	0|0|0	0|0|0	0|0|0	0|0|0	0|0|0	0|0|0	0|0|0	0|0|0	0|0|0	0|0|0	0|0|0	0|0|0	0|0|0	0|0|0	0|0|0	0|0|0	0|0|0	0|0|0	0|0|0	0|0|0	0|0|0	0|0|0	0|0|0	0|0|0	0|0|0	0|0|0	0|0|0	2|3056|65	0|0|0	0|0|0	0|0|0	0|0|0	0|0|0	0|0|0	0|0|0	0|0|0	0|0|0	0|0|0	0|0|0	0|0|0	0|0|0	0|0|0	0|0|0	0|0|0	0|0|0
12	1|916|109	8|1447|552	0|0|0	0|0|0	1|60|1666	0|0|0	0|0|0	0|0|0	0|0|0	0|0|0	0|0|0	0|0|0	0|0|0	0|0|0	0|0|0	0|0|0	1|1764|56	0|0|0	0|0|0	0|0|0	0|0|0	0|0|0	0|0|0	1|189|529	0|0|0	1|19|5263	0|0|0	0|0|0	0|0|0	0|0|0	2|3124|64	4|3446|116	0|0|0	0|0|0	0|0|0	0|0|0	0|0|0	1|3253|30	0|0|0	0|0|0	0|0|0	0|0|0	0|0|0	0|0|0	0|0|0	0|0|0	0|0|0	0|0|0	0|0|0
13	1|453|220	2|897|222	0|0|0	0|0|0	0|0|0	0|0|0	0|0|0	0|0|0	0|0|0	0|0|0	0|0|0	0|0|0	0|0|0	0|0|0	0|0|0	0|0|0	1|1191|83	0|0|0	0|0|0	0|0|0	0|0|0	0|0|0	0|0|0	0|0|0	0|0|0	0|0|0	0|0|0	0|0|0	0|0|0	0|0|0	0|0|0	4|3152|126	0|0|0	0|0|0	0|0|0	0|0|0	0|0|0	0|0|0	0|0|0	1|24|4166	0|0|0	0|0|0	1|426|234	0|0|0	0|0|0	0|0|0	0|0|0	0|0|0	0|0|0
14	0|0|0	2|749|267	0|0|0	0|0|0	0|0|0	0|0|0	2|430|465	0|0|0	0|0|0	0|0|0	0|0|0	0|0|0	0|0|0	0|0|0	0|0|0	0|0|0	0|0|0	0|0|0	0|0|0	0|0|0	0|0|0	0|0|0	0|0|0	0|0|0	0|0|0	0|0|0	0|0|0	0|0|0	0|0|0	0|0|0	0|0|0	1|3132|31	0|0|0	0|0|0	0|0|0	0|0|0	0|0|0	0|0|0	0|0|0	0|0|0	0|0|0	0|0|0	0|0|0	0|0|0	0|0|0	0|0|0	0|0|0	0|0|0	0|0|0
15	1|471|212	2|776|257	0|0|0	0|0|0	0|0|0	0|0|0	1|419|238	0|0|0	0|0|0	0|0|0	0|0|0	0|0|0	0|0|0	0|0|0	0|0|0	0|0|0	0|0|0	0|0|0	0|0|0	0|0|0	0|0|0	0|0|0	0|0|0	0|0|0	0|0|0	0|0|0	0|0|0	0|0|0	0|0|0	0|0|0	0|0|0	4|3208|124	0|0|0	0|0|0	0|0|0	0|0|0	0|0|0	0|0|0	0|0|0	0|0|0	0|0|0	0|0|0	0|0|0	0|0|0	0|0|0	0|0|0	0|0|0	1|811|123	0|0|0
16	0|0|0	3|763|393	0|0|0	0|0|0	0|0|0	0|0|0	0|0|0	0|0|0	0|0|0	0|0|0	1|56|1785	0|0|0	0|0|0	0|0|0	0|0|0	0|0|0	0|0|0	0|0|0	0|0|0	0|0|0	0|0|0	0|0|0	0|0|0	1|158|632	0|0|0	0|0|0	0|0|0	0|0|0	1|42|2380	0|0|0	0|0|0	1|3062|32	0|0|0	0|0|0	0|0|0	0|0|0	0|0|0	1|3057|32	0|0|0	0|0|0	0|0|0	1|58|1724	0|0|0	0|0|0	0|0|0	0|0|0	0|0|0	0|0|0	1|1619|61
17	2|563|355	4|892|448	0|0|0	0|0|0	0|0|0	1|137|729	0|0|0	0|0|0	1|25|4000	0|0|0	0|0|0	0|0|0	0|0|0	0|0|0	0|0|0	0|0|0	0|0|0	0|0|0	0|0|0	0|0|0	0|0|0	0|0|0	0|0|0	2|186|1075	1|1|100000	0|0|0	0|0|0	0|0|0	0|0|0	0|0|0	0|0|0	4|2843|140	0|0|0	0|0|0	0|0|0	0|0|0	0|0|0	0|0|0	0|0|0	0|0|0	0|0|0	0|0|0	0|0|0	0|0|0	0|0|0	0|0|0	0|0|0	1|921|108	0|0|0
18	0|0|0	7|979|715	0|0|0	0|0|0	0|0|0	0|0|0	0|0|0	0|0|0	0|0|0	0|0|0	0|0|0	0|0|0	0|0|0	0|0|0	0|0|0	1|191|523	0|0|0	0|0|0	3|930|322	0|0|0	0|0|0	0|0|0	0|0|0	2|410|487	0|0|0	0|0|0	0|0|0	0|0|0	1|114|877	0|0|0	0|0|0	4|2321|172	0|0|0	0|0|0	0|0|0	0|0|0	0|0|0	1|2380|42	0|0|0	0|0|0	0|0|0	0|0|0	1|343|291	0|0|0	0|0|0	0|0|0	0|0|0	1|607|164	0|0|0
19	1|349|286	1|767|130	0|0|0	0|0|0	0|0|0	0|0|0	0|0|0	0|0|0	0|0|0	0|0|0	0|0|0	1|210|476	0|0|0	0|0|0	0|0|0	1|286|349	0|0|0	0|0|0	1|527|189	1|89|1123	0|0|0	0|0|0	0|0|0	1|144|694	0|0|0	0|0|0	0|0|0	0|0|0	0|0|0	0|0|0	0|0|0	1|1263|79	0|0|0	0|0|0	0|0|0	0|0|0	0|0|0	0|0|0	0|0|0	0|0|0	0|0|0	0|0|0	0|0|0	0|0|0	0|0|0	0|0|0	0|0|0	0|0|0	0|0|0
20	1|309|323	6|727|825	0|0|0	0|0|0	0|0|0	0|0|0	0|0|0	0|0|0	0|0|0	0|0|0	1|136|735	0|0|0	0|0|0	0|0|0	0|0|0	0|0|0	0|0|0	0|0|0	0|0|0	0|0|0	0|0|0	0|0|0	0|0|0	1|85|1176	0|0|0	0|0|0	0|0|0	0|0|0	0|0|0	0|0|0	0|0|0	1|1192|83	0|0|0	0|0|0	0|0|0	0|0|0	0|0|0	0|0|0	0|0|0	0|0|0	0|0|0	0|0|0	0|0|0	0|0|0	0|0|0	0|0|0	0|0|0	0|0|0	0|0|0
21	0|0|0	3|659|455	0|0|0	0|0|0	0|0|0	0|0|0	0|0|0	0|0|0	0|0|0	0|0|0	0|0|0	0|0|0	0|0|0	0|0|0	0|0|0	0|0|0	0|0|0	0|0|0	0|0|0	0|0|0	0|0|0	0|0|0	1|411|243	0|0|0	0|0|0	0|0|0	0|0|0	1|390|256	1|104|961	0|0|0	0|0|0	2|953|209	0|0|0	0|0|0	0|0|0	0|0|0	0|0|0	1|196|510	0|0|0	0|0|0	0|0|0	0|0|0	0|0|0	0|0|0	0|0|0	0|0|0	0|0|0	0|0|0	0|0|0
22	1|288|347	3|734|408	0|0|0	1|12|8333	0|0|0	0|0|0	0|0|0	0|0|0	0|0|0	0|0|0	0|0|0	2|198|1010	0|0|0	0|0|0	0|0|0	0|0|0	0|0|0	0|0|0	1|245|408	0|0|0	0|0|0	0|0|0	0|0|0	0|0|0	0|0|0	0|0|0	0|0|0	0|0|0	0|0|0	0|0|0	0|0|0	1|878|113	0|0|0	0|0|0	0|0|0	1|25|4000	0|0|0	0|0|0	0|0|0	0|0|0	0|0|0	0|0|0	0|0|0	0|0|0	0|0|0	0|0|0	0|0|0	0|0|0	0|0|0
23	0|0|0	2|708|282	0|0|0	0|0|0	0|0|0	0|0|0	1|608|164	0|0|0	0|0|0	0|0|0	0|0|0	0|0|0	0|0|0	0|0|0	0|0|0	0|0|0	0|0|0	0|0|0	0|0|0	0|0|0	0|0|0	0|0|0	0|0|0	0|0|0	0|0|0	0|0|0	0|0|0	0|0|0	0|0|0	0|0|0	0|0|0	1|915|109	0|0|0	0|0|0	0|0|0	0|0|0	0|0|0	0|0|0	0|0|0	0|0|0	0|0|0	0|0|0	0|0|0	0|0|0	0|0|0	0|0|0	0|0|0	0|0|0	0|0|0
24	0|0|0	1|661|151	0|0|0	0|0|0	0|0|0	0|0|0	0|0|0	0|0|0	0|0|0	0|0|0	1|161|621	0|0|0	0|0|0	0|0|0	0|0|0	0|0|0	0|0|0	0|0|0	1|227|440	0|0|0	0|0|0	0|0|0	0|0|0	0|0|0	0|0|0	0|0|0	0|0|0	1|311|321	1|90|1111	0|0|0	0|0|0	0|0|0	0|0|0	0|0|0	0|0|0	0|0|0	0|0|0	0|0|0	0|0|0	0|0|0	0|0|0	0|0|0	0|0|0	0|0|0	0|0|0	0|0|0	0|0|0	0|0|0	0|0|0
25	0|0|0	4|731|547	2|208|961	0|0|0	0|0|0	0|0|0	1|643|155	0|0|0	0|0|0	0|0|0	0|0|0	0|0|0	0|0|0	0|0|0	0|0|0	1|225|444	0|0|0	0|0|0	0|0|0	0|0|0	0|0|0	0|0|0	1|399|250	0|0|0	0|0|0	0|0|0	0|0|0	0|0|0	2|95|2105	0|0|0	1|471|212	2|911|219	0|0|0	0|0|0	0|0|0	0|0|0	0|0|0	0|0|0	0|0|0	0|0|0	0|0|0	0|0|0	0|0|0	0|0|0	0|0|0	0|0|0	0|0|0	0|0|0	0|0|0
26	0|0|0	7|673|1040	0|0|0	0|0|0	0|0|0	0|0|0	0|0|0	0|0|0	0|0|0	0|0|0	0|0|0	0|0|0	0|0|0	0|0|0	0|0|0	0|0|0	1|343|291	0|0|0	1|241|414	0|0|0	1|9|11111	0|0|0	0|0|0	0|0|0	0|0|0	0|0|0	0|0|0	0|0|0	0|0|0	0|0|0	0|0|0	0|0|0	0|0|0	0|0|0	0|0|0	0|0|0	0|0|0	0|0|0	0|0|0	0|0|0	0|0|0	0|0|0	0|0|0	0|0|0	0|0|0	0|0|0	0|0|0	1|170|588	0|0|0
27	0|0|0	4|678|589	0|0|0	0|0|0	0|0|0	0|0|0	1|699|143	0|0|0	0|0|0	0|0|0	0|0|0	0|0|0	0|0|0	0|0|0	1|47|2127	0|0|0	0|0|0	0|0|0	0|0|0	1|52|1923	0|0|0	0|0|0	2|336|595	0|0|0	0|0|0	0|0|0	0|0|0	0|0|0	0|0|0	0|0|0	0|0|0	2|275|727	0|0|0	0|0|0	0|0|0	0|0|0	0|0|0	0|0|0	0|0|0	0|0|0	0|0|0	0|0|0	0|0|0	0|0|0	0|0|0	0|0|0	0|0|0	0|0|0	0|0|0
28	1|354|282	4|747|535	0|0|0	0|0|0	0|0|0	0|0|0	0|0|0	0|0|0	0|0|0	0|0|0	0|0|0	0|0|0	1|93|1075	0|0|0	0|0|0	0|0|0	0|0|0	0|0|0	0|0|0	0|0|0	0|0|0	0|0|0	0|0|0	0|0|0	0|0|0	0|0|0	0|0|0	0|0|0	0|0|0	0|0|0	0|0|0	0|0|0	0|0|0	0|0|0	0|0|0	0|0|0	0|0|0	0|0|0	0|0|0	0|0|0	0|0|0	0|0|0	0|0|0	0|0|0	0|0|0	0|0|0	0|0|0	0|0|0	0|0|0
29	1|361|277	4|650|615	1|242|413	0|0|0	0|0|0	0|0|0	0|0|0	0|0|0	0|0|0	0|0|0	0|0|0	1|286|349	0|0|0	0|0|0	0|0|0	0|0|0	1|377|265	0|0|0	0|0|0	0|0|0	0|0|0	0|0|0	0|0|0	0|0|0	0|0|0	0|0|0	0|0|0	1|181|552	0|0|0	0|0|0	0|0|0	0|0|0	0|0|0	0|0|0	0|0|0	0|0|0	0|0|0	0|0|0	0|0|0	0|0|0	0|0|0	0|0|0	0|0|0	0|0|0	0|0|0	0|0|0	0|0|0	0|0|0	0|0|0
30	0|0|0	1|863|115	0|0|0	0|0|0	0|0|0	0|0|0	2|824|242	0|0|0	0|0|0	0|0|0	0|0|0	0|0|0	0|0|0	0|0|0	0|0|0	0|0|0	0|0|0	0|0|0	0|0|0	0|0|0	0|0|0	0|0|0	1|322|310	0|0|0	0|0|0	0|0|0	0|0|0	1|152|657	0|0|0	0|0|0	0|0|0	0|0|0	0|0|0	0|0|0	0|0|0	0|0|0	0|0|0	0|0|0	0|0|0	0|0|0	0|0|0	0|0|0	0|0|0	0|0|0	0|0|0	0|0|0	0|0|0	0|0|0	0|0|0
31	0|0|0	0|0|0	0|0|0	0|0|0	0|0|0	0|0|0	1|896|111	0|0|0	0|0|0	0|0|0	0|0|0	0|0|0	0|0|0	0|0|0	0|0|0	0|0|0	1|358|279	0|0|0	0|0|0	0|0|0	0|0|0	0|0|0	1|283|353	0|0|0	0|0|0	0|0|0	0|0|0	0|0|0	0|0|0	0|0|0	0|0|0	0|0|0	0|0|0	0|0|0	0|0|0	0|0|0	0|0|0	0|0|0	0|0|0	0|0|0	0|0|0	0|0|0	0|0|0	0|0|0	0|0|0	0|0|0	0|0|0	0|0|0	0|0|0
32	0|0|0	3|769|390	0|0|0	0|0|0	0|0|0	0|0|0	1|793|126	1|17|5882	0|0|0	0|0|0	0|0|0	0|0|0	0|0|0	0|0|0	0|0|0	0|0|0	0|0|0	0|0|0	0|0|0	0|0|0	1|21|4761	0|0|0	0|0|0	0|0|0	0|0|0	0|0|0	0|0|0	1|143|699	1|89|1123	0|0|0	0|0|0	0|0|0	0|0|0	0|0|0	0|0|0	0|0|0	0|0|0	0|0|0	0|0|0	0|0|0	0|0|0	0|0|0	0|0|0	0|0|0	0|0|0	0|0|0	0|0|0	0|0|0	0|0|0
33	0|0|0	3|723|414	1|291|343	0|0|0	0|0|0	0|0|0	0|0|0	0|0|0	0|0|0	0|0|0	0|0|0	0|0|0	0|0|0	0|0|0	0|0|0	0|0|0	0|0|0	0|0|0	0|0|0	0|0|0	0|0|0	0|0|0	0|0|0	0|0|0	0|0|0	0|0|0	0|0|0	0|0|0	0|0|0	0|0|0	0|0|0	1|69|1449	0|0|0	0|0|0	0|0|0	0|0|0	0|0|0	0|0|0	0|0|0	0|0|0	0|0|0	0|0|0	0|0|0	0|0|0	0|0|0	0|0|0	0|0|0	0|0|0	0|0|0
34	0|0|0	0|0|0	0|0|0	0|0|0	0|0|0	0|0|0	1|856|116	0|0|0	0|0|0	0|0|0	0|0|0	0|0|0	0|0|0	0|0|0	0|0|0	0|0|0	0|0|0	0|0|0	0|0|0	1|46|2173	1|25|4000	0|0|0	1|304|328	0|0|0	0|0|0	0|0|0	0|0|0	0|0|0	1|95|1052	0|0|0	0|0|0	0|0|0	0|0|0	0|0|0	0|0|0	0|0|0	0|0|0	0|0|0	0|0|0	0|0|0	0|0|0	0|0|0	0|0|0	0|0|0	0|0|0	0|0|0	0|0|0	0|0|0	0|0|0
35	0|0|0	3|862|348	0|0|0	0|0|0	0|0|0	0|0|0	0|0|0	0|0|0	0|0|0	0|0|0	0|0|0	0|0|0	0|0|0	1|65|1538	0|0|0	0|0|0	0|0|0	0|0|0	0|0|0	0|0|0	0|0|0	0|0|0	1|288|347	0|0|0	0|0|0	0|0|0	0|0|0	0|0|0	0|0|0	0|0|0	0|0|0	0|0|0	0|0|0	0|0|0	0|0|0	0|0|0	0|0|0	0|0|0	0|0|0	0|0|0	0|0|0	0|0|0	0|0|0	0|0|0	0|0|0	0|0|0	0|0|0	0|0|0	0|0|0
36	1|311|321	2|819|244	0|0|0	1|18|5555	0|0|0	0|0|0	0|0|0	0|0|0	0|0|0	0|0|0	0|0|0	0|0|0	0|0|0	0|0|0	0|0|0	0|0|0	0|0|0	0|0|0	0|0|0	0|0|0	0|0|0	0|0|0	0|0|0	0|0|0	0|0|0	0|0|0	0|0|0	0|0|0	0|0|0	0|0|0	1|507|197	0|0|0	0|0|0	0|0|0	0|0|0	0|0|0	0|0|0	0|0|0	0|0|0	0|0|0	0|0|0	0|0|0	1|468|213	0|0|0	0|0|0	0|0|0	0|0|0	0|0|0	0|0|0
37	0|0|0	5|796|628	1|296|337	0|0|0	0|0|0	0|0|0	2|913|219	0|0|0	0|0|0	0|0|0	0|0|0	0|0|0	0|0|0	0|0|0	0|0|0	1|138|724	0|0|0	0|0|0	0|0|0	0|0|0	0|0|0	0|0|0	1|269|371	0|0|0	0|0|0	0|0|0	0|0|0	0|0|0	0|0|0	0|0|0	0|0|0	0|0|0	0|0|0	0|0|0	0|0|0	0|0|0	0|0|0	0|0|0	0|0|0	0|0|0	0|0|0	0|0|0	0|0|0	0|0|0	0|0|0	0|0|0	0|0|0	0|0|0	0|0|0
38	0|0|0	3|770|389	0|0|0	0|0|0	0|0|0	0|0|0	2|952|210	0|0|0	0|0|0	0|0|0	0|0|0	1|333|300	0|0|0	0|0|0	0|0|0	0|0|0	1|184|543	0|0|0	0|0|0	0|0|0	1|45|2222	0|0|0	0|0|0	0|0|0	0|0|0	0|0|0	0|0|0	0|0|0	1|93|1075	1|284|352	1|462|216	0|0|0	0|0|0	0|0|0	0|0|0	0|0|0	0|0|0	0|0|0	0|0|0	0|0|0	0|0|0	0|0|0	0|0|0	0|0|0	0|0|0	0|0|0	0|0|0	0|0|0	0|0|0
39	0|0|0	2|736|271	1|263|380	0|0|0	0|0|0	0|0|0	1|1014|98	0|0|0	0|0|0	0|0|0	0|0|0	0|0|0	0|0|0	0|0|0	0|0|0	0|0|0	0|0|0	0|0|0	0|0|0	0|0|0	0|0|0	0|0|0	0|0|0	0|0|0	0|0|0	0|0|0	0|0|0	0|0|0	1|83|1204	0|0|0	0|0|0	0|0|0	0|0|0	0|0|0	0|0|0	0|0|0	0|0|0	0|0|0	0|0|0	0|0|0	0|0|0	0|0|0	0|0|0	0|0|0	0|0|0	0|0|0	0|0|0	0|0|0	0|0|0
40	1|284|352	8|857|933	1|271|369	0|0|0	0|0|0	1|382|261	0|0|0	0|0|0	0|0|0	0|0|0	0|0|0	1|301|332	1|52|1923	0|0|0	0|0|0	1|111|900	0|0|0	0|0|0	3|176|1704	1|41|2439	0|0|0	0|0|0	1|223|448	0|0|0	0|0|0	0|0|0	0|0|0	1|55|1818	0|0|0	1|258|387	2|484|413	0|0|0	0|0|0	0|0|0	0|0|0	0|0|0	0|0|0	0|0|0	0|0|0	0|0|0	0|0|0	0|0|0	0|0|0	0|0|0	0|0|0	0|0|0	0|0|0	0|0|0	0|0|0
41	0|0|0	2|694|288	0|0|0	0|0|0	0|0|0	1|414|241	1|1001|99	0|0|0	0|0|0	0|0|0	1|68|1470	1|263|380	0|0|0	0|0|0	0|0|0	1|133|751	0|0|0	0|0|0	0|0|0	1|35|2857	0|0|0	0|0|0	0|0|0	0|0|0	0|0|0	0|0|0	0|0|0	0|0|0	2|74|2702	1|262|381	1|483|207	0|0|0	0|0|0	0|0|0	0|0|0	0|0|0	0|0|0	0|0|0	0|0|0	0|0|0	0|0|0	0|0|0	0|0|0	0|0|0	0|0|0	0|0|0	0|0|0	0|0|0	0|0|0
42	0|0|0	2|709|282	0|0|0	0|0|0	0|0|0	0|0|0	0|0|0	0|0|0	0|0|0	0|0|0	1|96|1041	0|0|0	0|0|0	0|0|0	0|0|0	0|0|0	0|0|0	0|0|0	0|0|0	0|0|0	0|0|0	0|0|0	0|0|0	0|0|0	0|0|0	0|0|0	1|6|16666	0|0|0	2|117|1709	0|0|0	0|0|0	0|0|0	0|0|0	0|0|0	0|0|0	0|0|0	0|0|0	0|0|0	0|0|0	0|0|0	0|0|0	0|0|0	1|449|222	0|0|0	0|0|0	0|0|0	0|0|0	0|0|0	0|0|0
43	0|0|0	1|705|141	0|0|0	0|0|0	0|0|0	0|0|0	0|0|0	0|0|0	0|0|0	0|0|0	0|0|0	0|0|0	0|0|0	0|0|0	0|0|0	0|0|0	0|0|0	0|0|0	0|0|0	0|0|0	0|0|0	0|0|0	0|0|0	0|0|0	0|0|0	0|0|0	0|0|0	0|0|0	0|0|0	0|0|0	0|0|0	0|0|0	0|0|0	0|0|0	0|0|0	0|0|0	0|0|0	0|0|0	0|0|0	0|0|0	0|0|0	0|0|0	0|0|0	0|0|0	0|0|0	0|0|0	0|0|0	0|0|0	0|0|0
44	0|0|0	2|665|300	1|344|290	0|0|0	0|0|0	1|460|217	0|0|0	0|0|0	0|0|0	0|0|0	2|83|2409	0|0|0	0|0|0	0|0|0	2|68|2941	1|132|757	0|0|0	0|0|0	0|0|0	1|55|1818	0|0|0	0|0|0	0|0|0	0|0|0	0|0|0	0|0|0	0|0|0	0|0|0	0|0|0	0|0|0	0|0|0	0|0|0	0|0|0	0|0|0	0|0|0	0|0|0	1|21|4761	0|0|0	0|0|0	0|0|0	0|0|0	0|0|0	0|0|0	0|0|0	0|0|0	0|0|0	0|0|0	0|0|0	0|0|0
45	0|0|0	7|700|1000	1|290|344	0|0|0	0|0|0	0|0|0	1|1127|88	0|0|0	0|0|0	0|0|0	0|0|0	0|0|0	0|0|0	0|0|0	0|0|0	0|0|0	1|108|925	0|0|0	1|152|657	0|0|0	0|0|0	0|0|0	1|133|751	0|0|0	0|0|0	0|0|0	0|0|0	0|0|0	0|0|0	0|0|0	0|0|0	0|0|0	0|0|0	0|0|0	0|0|0	0|0|0	0|0|0	0|0|0	0|0|0	0|0|0	0|0|0	0|0|0	0|0|0	0|0|0	0|0|0	0|0|0	0|0|0	0|0|0	0|0|0
46	0|0|0	3|606|495	2|321|623	0|0|0	0|0|0	0|0|0	2|1169|171	0|0|0	0|0|0	0|0|0	0|0|0	0|0|0	0|0|0	0|0|0	1|52|1923	0|0|0	0|0|0	0|0|0	0|0|0	1|32|3125	0|0|0	0|0|0	0|0|0	0|0|0	0|0|0	1|3|33333	0|0|0	0|0|0	1|80|1250	0|0|0	1|455|219	0|0|0	0|0|0	0|0|0	1|114|877	0|0|0	0|0|0	0|0|0	0|0|0	0|0|0	0|0|0	0|0|0	0|0|0	0|0|0	0|0|0	0|0|0	0|0|0	0|0|0	0|0|0
47	0|0|0	2|530|377	2|314|636	0|0|0	0|0|0	0|0|0	3|1167|257	0|0|0	0|0|0	0|0|0	0|0|0	0|0|0	0|0|0	0|0|0	0|0|0	0|0|0	0|0|0	0|0|0	0|0|0	0|0|0	0|0|0	0|0|0	0|0|0	0|0|0	0|0|0	0|0|0	0|0|0	0|0|0	0|0|0	0|0|0	0|0|0	0|0|0	0|0|0	0|0|0	0|0|0	0|0|0	0|0|0	0|0|0	0|0|0	0|0|0	0|0|0	0|0|0	0|0|0	0|0|0	0|0|0	0|0|0	0|0|0	0|0|0	0|0|0
48	1|181|552	2|516|387	0|0|0	0|0|0	0|0|0	2|537|372	3|1248|240	0|0|0	0|0|0	0|0|0	0|0|0	0|0|0	0|0|0	0|0|0	0|0|0	0|0|0	0|0|0	0|0|0	0|0|0	0|0|0	0|0|0	0|0|0	0|0|0	0|0|0	0|0|0	0|0|0	0|0|0	0|0|0	0|0|0	0|0|0	0|0|0	0|0|0	0|0|0	0|0|0	0|0|0	0|0|0	0|0|0	0|0|0	0|0|0	0|0|0	0|0|0	0|0|0	1|456|219	0|0|0	0|0|0	0|0|0	0|0|0	0|0|0	0|0|0
49	0|0|0	1|484|206	0|0|0	0|0|0	0|0|0	0|0|0	1|1224|81	0|0|0	0|0|0	0|0|0	0|0|0	0|0|0	0|0|0	0|0|0	0|0|0	0|0|0	0|0|0	0|0|0	0|0|0	0|0|0	0|0|0	0|0|0	0|0|0	0|0|0	0|0|0	0|0|0	0|0|0	0|0|0	1|74|1351	0|0|0	1|443|225	0|0|0	0|0|0	0|0|0	0|0|0	0|0|0	0|0|0	0|0|0	0|0|0	0|0|0	0|0|0	0|0|0	0|0|0	0|0|0	0|0|0	0|0|0	1|35|2857	0|0|0	0|0|0
50	0|0|0	6|588|1020	1|339|294	0|0|0	0|0|0	0|0|0	3|1295|231	0|0|0	0|0|0	0|0|0	0|0|0	0|0|0	0|0|0	0|0|0	0|0|0	0|0|0	0|0|0	0|0|0	0|0|0	0|0|0	0|0|0	0|0|0	0|0|0	0|0|0	0|0|0	0|0|0	0|0|0	0|0|0	0|0|0	0|0|0	0|0|0	0|0|0	0|0|0	0|0|0	0|0|0	0|0|0	0|0|0	0|0|0	0|0|0	0|0|0	0|0|0	0|0|0	0|0|0	0|0|0	0|0|0	0|0|0	0|0|0	0|0|0	0|0|0
51	1|151|662	2|436|458	0|0|0	0|0|0	0|0|0	0|0|0	1|1271|78	0|0|0	0|0|0	0|0|0	0|0|0	1|239|418	0|0|0	0|0|0	0|0|0	1|102|980	0|0|0	0|0|0	3|143|2097	0|0|0	0|0|0	0|0|0	0|0|0	0|0|0	0|0|0	0|0|0	0|0|0	0|0|0	1|103|970	0|0|0	2|504|396	0|0|0	0|0|0	0|0|0	0|0|0	0|0|0	0|0|0	0|0|0	0|0|0	0|0|0	0|0|0	0|0|0	1|594|168	0|0|0	0|0|0	0|0|0	0|0|0	0|0|0	0|0|0
52	0|0|0	4|433|923	2|422|473	0|0|0	1|22|4545	0|0|0	2|1306|153	0|0|0	1|4|25000	0|0|0	0|0|0	0|0|0	0|0|0	0|0|0	0|0|0	0|0|0	0|0|0	0|0|0	1|139|719	0|0|0	0|0|0	0|0|0	0|0|0	0|0|0	0|0|0	0|0|0	0|0|0	0|0|0	0|0|0	0|0|0	1|531|188	0|0|0	0|0|0	1|1591|62	0|0|0	0|0|0	0|0|0	0|0|0	0|0|0	0|0|0	0|0|0	0|0|0	0|0|0	0|0|0	0|0|0	0|0|0	0|0|0	0|0|0	0|0|0
53	0|0|0	1|408|245	2|347|576	0|0|0	0|0|0	0|0|0	5|1272|393	0|0|0	0|0|0	0|0|0	0|0|0	0|0|0	0|0|0	1|45|2222	0|0|0	1|79|1265	0|0|0	0|0|0	0|0|0	0|0|0	0|0|0	0|0|0	1|61|1639	0|0|0	0|0|0	0|0|0	0|0|0	0|0|0	0|0|0	0|0|0	1|471|212	0|0|0	0|0|0	0|0|0	1|118|847	0|0|0	0|0|0	0|0|0	0|0|0	0|0|0	0|0|0	0|0|0	0|0|0	0|0|0	0|0|0	0|0|0	0|0|0	0|0|0	0|0|0
54	0|0|0	2|335|597	3|423|709	0|0|0	0|0|0	1|713|140	1|1349|74	0|0|0	0|0|0	0|0|0	0|0|0	0|0|0	0|0|0	0|0|0	0|0|0	0|0|0	0|0|0	0|0|0	0|0|0	0|0|0	0|0|0	0|0|0	0|0|0	0|0|0	0|0|0	0|0|0	0|0|0	0|0|0	0|0|0	0|0|0	0|0|0	0|0|0	0|0|0	0|0|0	0|0|0	0|0|0	0|0|0	0|0|0	0|0|0	0|0|0	0|0|0	0|0|0	0|0|0	0|0|0	0|0|0	0|0|0	0|0|0	0|0|0	0|0|0
55	1|100|1000	0|0|0	1|394|253	0|0|0	0|0|0	1|777|128	1|1309|76	0|0|0	0|0|0	0|0|0	0|0|0	0|0|0	1|41|2439	0|0|0	0|0|0	1|79|1265	0|0|0	0|0|0	1|134|746	0|0|0	1|66|1515	0|0|0	0|0|0	1|14|7142	0|0|0	0|0|0	0|0|0	0|0|0	0|0|0	1|363|275	0|0|0	0|0|0	0|0|0	0|0|0	0|0|0	0|0|0	0|0|0	0|0|0	0|0|0	0|0|0	0|0|0	0|0|0	0|0|0	0|0|0	0|0|0	0|0|0	0|0|0	0|0|0	0|0|0
56	0|0|0	1|294|340	0|0|0	0|0|0	0|0|0	0|0|0	1|1276|78	0|0|0	0|0|0	0|0|0	0|0|0	1|198|505	0|0|0	0|0|0	0|0|0	0|0|0	0|0|0	0|0|0	0|0|0	1|34|2941	0|0|0	0|0|0	0|0|0	0|0|0	0|0|0	0|0|0	0|0|0	0|0|0	1|91|1098	1|342|292	0|0|0	0|0|0	0|0|0	2|1948|102	0|0|0	0|0|0	0|0|0	0|0|0	0|0|0	0|0|0	0|0|0	0|0|0	0|0|0	0|0|0	0|0|0	0|0|0	0|0|0	0|0|0	0|0|0
57	0|0|0	0|0|0	2|392|510	0|0|0	0|0|0	1|732|136	2|1266|157	0|0|0	0|0|0	0|0|0	0|0|0	0|0|0	0|0|0	0|0|0	0|0|0	0|0|0	0|0|0	0|0|0	0|0|0	0|0|0	0|0|0	0|0|0	0|0|0	0|0|0	0|0|0	0|0|0	0|0|0	0|0|0	0|0|0	0|0|0	0|0|0	0|0|0	0|0|0	0|0|0	0|0|0	0|0|0	0|0|0	0|0|0	0|0|0	0|0|0	0|0|0	0|0|0	0|0|0	0|0|0	0|0|0	0|0|0	0|0|0	0|0|0	0|0|0
58	0|0|0	2|265|754	1|359|278	0|0|0	0|0|0	1|765|130	1|1261|79	0|0|0	0|0|0	0|0|0	0|0|0	0|0|0	0|0|0	0|0|0	0|0|0	0|0|0	0|0|0	0|0|0	0|0|0	0|0|0	0|0|0	0|0|0	0|0|0	0|0|0	0|0|0	0|0|0	0|0|0	0|0|0	0|0|0	0|0|0	0|0|0	0|0|0	0|0|0	1|2070|48	1|91|1098	0|0|0	0|0|0	0|0|0	0|0|0	0|0|0	0|0|0	0|0|0	0|0|0	0|0|0	0|0|0	0|0|0	0|0|0	0|0|0	0|0|0
59	0|0|0	0|0|0	0|0|0	0|0|0	0|0|0	0|0|0	0|0|0	0|0|0	0|0|0	0|0|0	0|0|0	0|0|0	0|0|0	0|0|0	0|0|0	0|0|0	0|0|0	0|0|0	0|0|0	0|0|0	2|42|4761	0|0|0	0|0|0	0|0|0	0|0|0	0|0|0	0|0|0	0|0|0	0|0|0	1|370|270	0|0|0	0|0|0	0|0|0	0|0|0	0|0|0	0|0|0	0|0|0	0|0|0	0|0|0	0|0|0	0|0|0	0|0|0	0|0|0	0|0|0	0|0|0	0|0|0	0|0|0	0|0|0	0|0|0
60	0|0|0	2|224|892	0|0|0	0|0|0	0|0|0	1|1008|99	3|1345|223	0|0|0	0|0|0	0|0|0	0|0|0	0|0|0	0|0|0	0|0|0	0|0|0	0|0|0	0|0|0	0|0|0	0|0|0	0|0|0	0|0|0	0|0|0	0|0|0	0|0|0	0|0|0	0|0|0	0|0|0	0|0|0	0|0|0	0|0|0	0|0|0	0|0|0	0|0|0	0|0|0	0|0|0	1|31|3225	0|0|0	0|0|0	0|0|0	0|0|0	0|0|0	0|0|0	0|0|0	0|0|0	0|0|0	0|0|0	0|0|0	0|0|0	0|0|0
61	0|0|0	1|179|558	0|0|0	0|0|0	0|0|0	1|896|111	3|1222|245	0|0|0	0|0|0	0|0|0	0|0|0	1|148|675	0|0|0	0|0|0	0|0|0	1|55|1818	0|0|0	0|0|0	0|0|0	0|0|0	0|0|0	0|0|0	1|4|25000	0|0|0	0|0|0	0|0|0	0|0|0	0|0|0	1|56|1785	1|377|265	0|0|0	0|0|0	0|0|0	1|3855|25	0|0|0	0|0|0	0|0|0	0|0|0	0|0|0	0|0|0	0|0|0	0|0|0	0|0|0	0|0|0	0|0|0	0|0|0	0|0|0	0|0|0	0|0|0
62	0|0|0	1|159|628	0|0|0	0|0|0	0|0|0	0|0|0	0|0|0	0|0|0	0|0|0	0|0|0	0|0|0	0|0|0	0|0|0	0|0|0	0|0|0	0|0|0	0|0|0	0|0|0	0|0|0	0|0|0	1|45|2222	0|0|0	0|0|0	0|0|0	0|0|0	0|0|0	0|0|0	0|0|0	0|0|0	0|0|0	0|0|0	0|0|0	0|0|0	3|3550|84	0|0|0	0|0|0	0|0|0	0|0|0	0|0|0	0|0|0	0|0|0	0|0|0	0|0|0	0|0|0	0|0|0	0|0|0	0|0|0	0|0|0	0|0|0
63	0|0|0	1|112|892	1|357|280	0|0|0	0|0|0	1|933|107	2|1170|170	0|0|0	0|0|0	0|0|0	0|0|0	0|0|0	0|0|0	1|20|5000	0|0|0	1|69|1449	0|0|0	0|0|0	0|0|0	0|0|0	0|0|0	0|0|0	0|0|0	1|11|9090	0|0|0	0|0|0	1|4|25000	0|0|0	0|0|0	0|0|0	0|0|0	0|0|0	0|0|0	0|0|0	0|0|0	0|0|0	0|0|0	0|0|0	0|0|0	0|0|0	0|0|0	0|0|0	0|0|0	0|0|0	0|0|0	0|0|0	0|0|0	0|0|0	0|0|0
64	0|0|0	3|105|2857	1|384|260	0|0|0	0|0|0	0|0|0	4|1119|357	0|0|0	0|0|0	0|0|0	0|0|0	0|0|0	0|0|0	0|0|0	0|0|0	0|0|0	0|0|0	0|0|0	0|0|0	0|0|0	1|30|3333	0|0|0	0|0|0	0|0|0	0|0|0	0|0|0	0|0|0	0|0|0	0|0|0	0|0|0	0|0|0	0|0|0	0|0|0	1|3164|31	0|0|0	0|0|0	0|0|0	0|0|0	1|157|636	0|0|0	0|0|0	0|0|0	1|799|125	0|0|0	0|0|0	0|0|0	0|0|0	0|0|0	0|0|0
65	0|0|0	0|0|0	1|516|193	0|0|0	0|0|0	1|3208|31	1|2543|39	0|0|0	0|0|0	0|0|0	0|0|0	1|211|473	0|0|0	0|0|0	0|0|0	0|0|0	0|0|0	0|0|0	2|91|2197	0|0|0	0|0|0	0|0|0	0|0|0	0|0|0	0|0|0	1|32|3125	0|0|0	0|0|0	0|0|0	1|438|228	0|0|0	0|0|0	0|0|0	0|0|0	0|0|0	0|0|0	0|0|0	0|0|0	2|1477|135	0|0|0	0|0|0	0|0|0	2|769|260	0|0|0	0|0|0	0|0|0	0|0|0	0|0|0	0|0|0
66	0|0|0	2|88|2272	0|0|0	0|0|0	0|0|0	5|3613|138	2|2392|83	0|0|0	0|0|0	0|0|0	0|0|0	0|0|0	0|0|0	0|0|0	1|38|2631	0|0|0	0|0|0	0|0|0	0|0|0	0|0|0	0|0|0	0|0|0	0|0|0	0|0|0	0|0|0	0|0|0	0|0|0	0|0|0	0|0|0	0|0|0	0|0|0	0|0|0	0|0|0	1|3294|30	0|0|0	0|0|0	0|0|0	0|0|0	0|0|0	0|0|0	0|0|0	0|0|0	0|0|0	0|0|0	0|0|0	0|0|0	0|0|0	0|0|0	0|0|0
67	0|0|0	2|75|2666	2|436|458	0|0|0	0|0|0	0|0|0	2|2126|94	0|0|0	0|0|0	0|0|0	0|0|0	0|0|0	0|0|0	0|0|0	0|0|0	2|42|4761	0|0|0	0|0|0	2|61|3278	0|0|0	0|0|0	0|0|0	0|0|0	0|0|0	0|0|0	0|0|0	0|0|0	0|0|0	0|0|0	0|0|0	0|0|0	0|0|0	0|0|0	2|3152|63	0|0|0	0|0|0	0|0|0	0|0|0	1|566|176	0|0|0	0|0|0	0|0|0	0|0|0	0|0|0	0|0|0	0|0|0	0|0|0	0|0|0	0|0|0
68	0|0|0	0|0|0	3|400|750	0|0|0	0|0|0	0|0|0	3|2019|148	0|0|0	0|0|0	0|0|0	0|0|0	0|0|0	0|0|0	0|0|0	0|0|0	0|0|0	0|0|0	1|1|100000	0|0|0	0|0|0	0|0|0	0|0|0	0|0|0	0|0|0	0|0|0	0|0|0	0|0|0	0|0|0	0|0|0	1|379|263	0|0|0	0|0|0	0|0|0	0|0|0	0|0|0	0|0|0	0|0|0	0|0|0	0|0|0	0|0|0	0|0|0	0|0|0	0|0|0	0|0|0	0|0|0	0|0|0	0|0|0	0|0|0	0|0|0
[truncated: 2,607 more rows]
[truncated: 18 more columns]

## Sheet: kd-mis
['Multisystem inflammatory syndrome', 'Multisystem inflammatory syndrome in adults', 'Multisystem inflammatory syndrome in children', "Kawasaki's disease"]
Vaccine code report
[truncated: 2,488 more rows]
[truncated: 15 more columns]

## Sheet: KD-MIS2
['Multisystem inflammatory syndrome'	'Multisystem inflammatory syndrome in adults'	'Multisystem inflammatory syndrome in children'	"Kawasaki's disease"]
[truncated: 2,516 more rows]
[truncated: 13 more columns]
